# Supplementary material for: Rh-catalyzed regiodivergent hydrosilylation of acyl aminocyclopropanes controlled by monophosphine ligands
Source: Royal Society of Chemistry journal article supplement (doi:10.1039/c7sc00071e), 2017-01-01

Supplementary Information

---

## **Rh-Catalyzed Regiodivergent Hydrosilylation of Acyl aminocyclopropanes Controlled by Monophosphine Ligands**

Hiroki Kondo,<sup>1</sup> Kenichiro Itami,<sup>1,2</sup> and Junichiro Yamaguchi\*<sup>3</sup>

<sup>1</sup> *Department of Chemistry, Graduate School of Science and Institute of Transformative Bio-Molecules (WPI-ITbM),  
Nagoya University, Chikusa, Nagoya 464-8602, Japan*

<sup>2</sup> *JST, ERATO, Itami Molecular Nanocarbon Project, Nagoya University, Chikusa, Nagoya 464-8602, Japan*

<sup>3</sup> *Department of Applied Chemistry, Waseda University, 3-4-1 Ohkubo, Shinjuku, Tokyo 169-8555, Japan.*

E-mail: junyamaguchi@waseda.jp

---

### **Table of Contents**

|                                                                                                            |          |
|------------------------------------------------------------------------------------------------------------|----------|
| 1. General                                                                                                 | S2       |
| 2. Preparation of Substituted Aminocyclopropanes                                                           | S3-S9    |
| 3. General Procedure for Hydrosilylation with [Rh(cod)Cl] <sub>2</sub> /P(1-nap) <sub>3</sub>              | S10-S19  |
| 4. General Procedure for Hydrosilylation with [Rh(cod)Cl] <sub>2</sub> /PCy <sub>3</sub> ·HBF <sub>4</sub> | S20-S22  |
| 5. Synthetic Applications                                                                                  | S23-S24  |
| 6. Mechanistic Considerations                                                                              | S25-S29  |
| 7. Proposed Reaction Mechanism                                                                             | S30      |
| 8. Effect of Reaction Parameters                                                                           | S31      |
| 9. Discovery of Rh-catalyzed Hydrosilylation                                                               | S32      |
| 10. <sup>1</sup> H and <sup>13</sup> C NMR Spectra                                                         | S33-S134 |

## 1. General

Unless otherwise noted, all reactants or reagents including dry solvents were obtained from commercial suppliers and used as received. 1,4-Bis(diphenylphosphino)butane (dppb), 1,1,1,3,5,5,5-heptamethyltrisiloxane (**2a**) and dimethyl(phenyl)silane (**2e**) were obtained from TCI Chemical. Triphenylphosphine, tricyclohexylphosphonium tetrafluoroborate (PCy<sub>3</sub>·HBF<sub>4</sub>) and *tert*-butyldimethylsilane (**2b**) were obtained from Wako Chemicals. 1,10-Phenanthroline (phen), dicyclohexylphenylphosphine (PCy<sub>2</sub>Ph), tri(naphthalen-1-yl)phosphine (P(1-nap)<sub>3</sub>), tripropylsilane (**2c**), diethylmethylsilane (**2d**) and [Rh(cod)OMe]<sub>2</sub> were obtained from Sigma-Aldrich. [Rh(cod)Cl]<sub>2</sub> was prepared by according to a procedure reported in the literature.<sup>[1]</sup> Unless otherwise noted, all reactions were performed with dry solvents under an atmosphere of nitrogen in dried glassware using standard vacuum-line techniques. All hydrosilylation reactions were performed in 20-mL glass vessel tubes equipped with a J. Young® O-ring tap and heated in an 8-well reaction block (heater + magnetic stirrer). All work-up and purification procedures were carried out with reagent-grade solvents in air.

Analytical thin-layer chromatography (TLC) was performed using E. Merck silica gel 60 F<sub>254</sub> precoated plates (0.25 mm). The developed chromatogram was analyzed by UV lamp (254 nm) or a phosphomolybdic acid/sulfuric acid solution. Flash column chromatography was performed with E. Merck silica gel 60 (230–400 mesh) or Biotage Isolera® equipped with Biotage SNAP Cartridge KP-Sil columns using hexane/ethyl acetate as eluent. Medium-pressure liquid chromatography (MPLC) was performed using Yamazen W-prep 2XY. Preparative thin-layer chromatography (PTLC) was performed using Wakogel B5-F silica coated plates (0.75 mm) prepared in our laboratory. Preparative gel permeation chromatography (GPC) was performed with a JAI LC-9204 instrument equipped with JAIGEL-1H/JAIGEL-2H columns using chloroform as eluent. LCMS analysis was conducted on an Agilent 6100 instrument equipped with Poroshell 120 EC-C18 column (2.1x100 mm, 2.7 μm) using acetonitrile/5 mM HCOONH<sub>4</sub> in water as eluent. High-resolution mass spectra (HRMS) were obtained from Thermo Fisher Scientific Exactive (ESI and DART). Nuclear magnetic resonance (NMR) spectra were recorded on a JEOL JNM-ECA-600 spectrometer (<sup>1</sup>H 600 MHz, <sup>13</sup>C 151 MHz), a JEOL JNM-ECA-500 spectrometer (<sup>1</sup>H 500 MHz, <sup>13</sup>C 126 MHz) and a JEOL JNM-ECA-400 spectrometer (<sup>1</sup>H 400 MHz, <sup>13</sup>C 101 MHz). Chemical shifts for <sup>1</sup>H NMR are expressed in parts per million (ppm) relative to tetramethylsilane (δ 0.00 ppm) or residual peak of DMSO (δ 2.50 ppm) or CH<sub>2</sub>Cl<sub>2</sub> (δ 5.32 ppm). Chemical shifts for <sup>13</sup>C NMR are expressed in ppm relative to CDCl<sub>3</sub> (δ 77.0 ppm) or DMSO (δ 39.5 ppm) or CD<sub>2</sub>Cl<sub>2</sub> (δ 53.84 ppm). Data are reported as follows: chemical shift, multiplicity (s = singlet, d = doublet, dd = doublet of doublets, t = triplet, dt = doublet of triplets, td = triplet of doublets, q = quartet, quin = quintet, sext = sextet, m = multiplet, brs = broad singlet), coupling constant (Hz), and integration.

<sup>[1]</sup> Uson, R.; Oro, L. A.; Cabeza, J. A.; Bryndza, H. E.; Stepro, M. P. *Inorg. Synth.* **1985**, 23, 126.

## 2. Preparation of Substituted Aminocyclopropanes

*Note:* *N*-Cyclopropylpivalamide (**1A**),<sup>[2]</sup> *N*-cyclopropylcyclohexanecarboxamide (**1C**),<sup>[2]</sup> *N*-cyclopropylisobutyramide (**1D**),<sup>[2]</sup> *tert*-butyl cyclopropylcarbamate (**1G**),<sup>[2]</sup> *N*-cyclopropyl-4-methylbenzamide (**1I**),<sup>[3]</sup> and *N*-cyclopropyl-4-methoxybenzamide (**1J**)<sup>[4]</sup> were synthesized according to procedures reported in the literature.

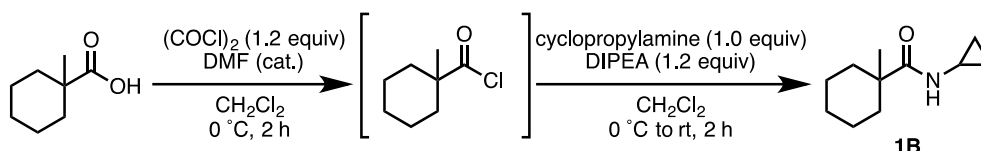

***N*-Cyclopropyl-1-methylcyclohexane-1-carboxamide (1B):** To a solution of 1-methylcyclohexane-1-carboxylic acid (1.1 g, 9.5 mmol) and *N,N*-dimethylformamide (DMF: 0.1 mL) in dichloromethane (50 mL) was slowly added (COCl)<sub>2</sub> (0.97 mL, 11.4 mmol) at 0 °C. The reaction mixture was stirred at 0 °C for 2 h. The reaction mixture was evaporated. The crude acid chloride and *N,N*-diisopropylethylamine (DIPEA: 2.0 mL, 11.4 mmol) were dissolved in dichloromethane (50 mL). To this solution was slowly added cyclopropylamine (1.5 mL, 9.5 mmol) at 0 °C. The reaction mixture was stirred at room temperature for 2 h. The mixture was extracted with dichloromethane and the combined organic layers were washed with brine, dried over Na<sub>2</sub>SO<sub>4</sub>, filtered and concentrated *in vacuo*. The residue was purified by Isolera® (hexane/ethyl acetate = 2:1 to 0:1). The obtained solid was washed with hexane to afford **1B** (1.5 g, 87%) as a orange solid. <sup>1</sup>H NMR (600 MHz, CDCl<sub>3</sub>) δ 5.70 (brs, 1H), 2.74–2.68 (m, 1H), 1.89–1.81 (m, 2H), 1.57–1.50 (m, 2H), 1.49–1.37 (m, 3H), 1.36–1.27 (m, 3H), 1.11 (s, 3H), 0.80–0.74 (m, 2H), 0.47–0.42 (m, 2H); <sup>13</sup>C NMR (151 MHz, CDCl<sub>3</sub>) δ 179.1, 42.4, 35.6, 26.2, 25.8, 22.8, 22.7, 6.7; HRMS (ESI) *m/z* calcd for C<sub>11</sub>H<sub>19</sub>NNaO [M+Na]<sup>+</sup>: 204.1359, found 204.1364.

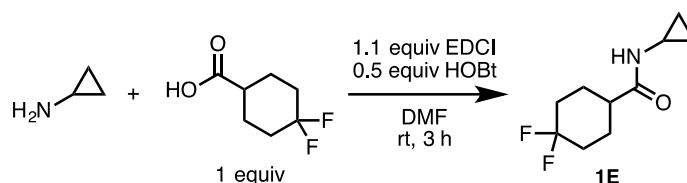

***N*-Cyclopropyl-4,4-difluorocyclohexane-1-carboxamide (1E):** To a round-bottom flask was added 4,4-difluorocyclohexane-1-carboxylic acid (443 mg, 2.7 mmol), 1-ethyl-3-(3-dimethylaminopropyl)carbodiimide (EDCI: 569 mg, 3.0 mmol, 1.1 equiv), 1-hydroxybenzotriazole

<sup>[2]</sup> Miyamura, S.; Araki, M.; Suzuki, T.; Yamaguchi, J.; Itami, K. *Angew. Chem., Int. Ed.* **2015**, *54*, 846.

<sup>[3]</sup> Zheng, Y.; Liu, B.; Gou, Z.; Li, Y.; Zhang, X.; Wang, Y.; Yu, S.; Li, Y.; Sun, D. *Bioorg. Med. Chem. Lett.* **2015**, *25*, 791.

<sup>[4]</sup> Baburajan, P.; Elango, K. P. *Tetrahedron Lett.* **2014**, *55*, 1006.

(HOBt: 182 mg, 1.4 mmol, 0.5 equiv) and DMF (10 mL). Cyclopropylamine (0.19 mL, 2.7 mmol) was added to the mixture. After stirring for 3 h at room temperature, saturated aqueous NaHCO<sub>3</sub> was added to the mixture and the mixture was extracted with ethyl acetate. The organic layers were washed with brine, dried over Na<sub>2</sub>SO<sub>4</sub> and concentrated *in vacuo*. The residue was purified by Isolera<sup>®</sup> (hexane/ethyl acetate = 1:1 to 0:1). The obtained solid was crystallized from hexane to afford **1E** (372 mg, 68%) as a white solid. <sup>1</sup>H NMR (600 MHz, CDCl<sub>3</sub>) δ 5.54 (brs, 1H), 2.74–2.69 (m, 1H), 2.21–2.07 (m, 3H), 1.94–1.87 (m, 2H), 1.85–1.66 (m, 4H), 0.81–0.76 (m, 2H), 0.49–0.45 (m, 2H); <sup>13</sup>C NMR (126 MHz, CDCl<sub>3</sub>) δ 175.3, 122.6 (t, *J* = 239.6 Hz), 42.6, 32.8 (t, *J* = 23.9 Hz), 25.8 (t, *J* = 9.5 Hz), 22.6, 6.7; HRMS (ESI) *m/z* calcd for C<sub>10</sub>H<sub>15</sub>F<sub>2</sub>NNaO [M+Na]<sup>+</sup>: 226.1014, found 226.1014.

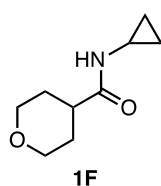

**N-Cyclopropyltetrahydro-2H-pyran-4-carboxamide (1F):** The synthetic procedure of **1F** is the same as that of **1E**. 6.0 mmol scale. Purification by Isolera<sup>®</sup> (hexane/ethyl acetate = 1:1 to 0:1); the obtained solid was crystallized from hexane and ethyl acetate to afford **1F** (437 mg, 43%) as a white solid. <sup>1</sup>H NMR (600 MHz, CDCl<sub>3</sub>) δ 5.55 (brs, 1H), 4.03–3.98 (m, 2H), 3.39 (td, *J* = 11.4, 2.4 Hz, 2H), 2.74–2.69 (m, 1H), 2.30–2.23 (m, 1H), 1.82–1.70 (m, 4H), 0.81–0.75 (m, 2H), 0.50–0.45 (m, 2H); <sup>13</sup>C NMR (126 MHz, CDCl<sub>3</sub>) δ 175.6, 67.2, 42.0, 29.2, 22.6, 6.7; HRMS (ESI) *m/z* calcd for C<sub>9</sub>H<sub>15</sub>NNaO<sub>2</sub> [M+Na]<sup>+</sup>: 192.0995, found 192.0996.

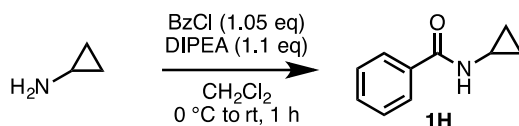

**N-Cyclopropylbenzamide (1H)**<sup>[5]</sup>: To a solution of cyclopropylamine (0.49 mL, 7.0 mmol) and *N,N*-diisopropylethylamine (DIPEA: 1.3 mL, 7.7 mmol, 1.1 equiv) in dichloromethane (10 mL) was slowly added a solution of benzoyl chloride (BzCl: 0.85 mL, 7.4 mmol, 1.05 equiv) in dichloromethane (5 mL) at 0 °C. The reaction mixture was stirred at room temperature for 1 h. To the reaction mixture was added saturated aqueous NaHCO<sub>3</sub>, which was then extracted with dichloromethane. The combined organic layers were washed with brine, dried over Na<sub>2</sub>SO<sub>4</sub>, filtered and concentrated *in vacuo*. The residue was purified by MPLC (hexane/ethyl acetate = 5:1 to 2:1). The obtained solid was crystallized from hexane and ethyl acetate to give **1H** (1.1 g, 97%) as a white solid. <sup>1</sup>H NMR (600 MHz, CDCl<sub>3</sub>) δ 7.73 (dd, *J* = 7.8,

<sup>[5]</sup> Lin, J.-P.; Long, Y.-Q. *Chem. Commun.* **2013**, 49, 5313.

1.8 Hz, 2H), 7.51–7.47 (m, 1H), 7.42 (t,  $J = 1.8$  Hz, 2H), 6.23 (brs, 1H), 2.94–2.89 (m, 1H), 0.91–0.84 (m, 2H), 0.65–0.60 (m, 2H);  $^{13}\text{C}$  NMR (126 MHz,  $\text{CDCl}_3$ )  $\delta$  168.9, 134.4, 131.4, 128.5, 126.8, 23.1, 6.8; HRMS (ESI)  $m/z$  calcd for  $\text{C}_{10}\text{H}_{11}\text{NNaO}$   $[\text{M}+\text{Na}]^+$ : 184.0733, found 184.0734.

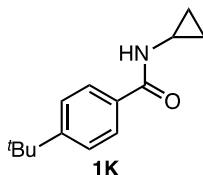

**4-(*tert*-Butyl)-*N*-cyclopropylbenzamide (1K):** The synthetic procedure of **1K** is the same as that of **1H**. 4.0 mmol scale. Purification by MPLC (hexane/ethyl acetate = 2:1); the obtained solid was crystallized from hexane and ethyl acetate to afford **1K** (720 mg, 83%) as a white solid.  $^1\text{H}$  NMR (600 MHz,  $\text{CDCl}_3$ )  $\delta$  7.67 (d,  $J = 8.4$  Hz, 2H), 7.42 (d,  $J = 8.4$  Hz, 2H), 6.22 (brs, 1H), 2.92–2.87 (m, 1H), 1.32 (s, 9H), 0.90–0.83 (m, 2H), 0.64–0.58 (m, 2H);  $^{13}\text{C}$  NMR (151 MHz,  $\text{CDCl}_3$ )  $\delta$  168.7, 154.9, 131.6, 126.6, 125.4, 34.9, 31.1, 23.0, 6.8; HRMS (ESI)  $m/z$  calcd for  $\text{C}_{14}\text{H}_{19}\text{NNaO}$   $[\text{M}+\text{Na}]^+$ : 240.1359, found 240.1357.

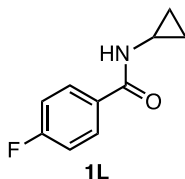

***N*-Cyclopropyl-4-fluorobenzamide (1L):** The synthetic procedure of **1L** is the same as that of **1H**. 21.3 mmol scale. Purification by MPLC (hexane/ethyl acetate = 3:1 to 1:1); the obtained solid was crystallized from hexane and ethyl acetate to afford **1L** (2.1 g, 55%) as a white solid.  $^1\text{H}$  NMR (600 MHz,  $\text{CDCl}_3$ )  $\delta$  7.78–7.72 (m, 2H), 7.12–7.06 (m, 2H), 6.20 (brs, 1H), 2.92–2.86 (m, 1H), 0.92–0.83 (m, 2H), 0.66–0.58 (m, 2H);  $^{13}\text{C}$  NMR (151 MHz,  $\text{CDCl}_3$ )  $\delta$  167.8, 164.7 (d,  $J_{\text{FC}} = 250.2$  Hz), 130.6 (d,  $J_{\text{FC}} = 2.9$  Hz), 129.1 (d,  $J_{\text{FC}} = 8.6$  Hz), 115.5 (d,  $J_{\text{FC}} = 21.6$  Hz), 23.2, 6.7; HRMS (ESI)  $m/z$  calcd for  $\text{C}_{10}\text{H}_9\text{FNNaO}$   $[\text{M}+\text{Na}]^+$ : 202.0639, found 202.0639.

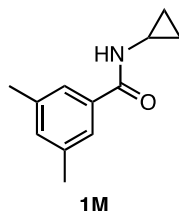

***N*-Cyclopropyl-3,5-dimethylbenzamide (1M):** The synthetic procedure of **1M** is the same as that of **1H**. 3.5 mmol scale. Purification by MPLC (hexane/ethyl acetate = 3:1 to 1:1); the obtained solid was

crystallized from hexane and ethyl acetate to afford **1M** (250 mg, 38%) as a white solid.  $^1\text{H}$  NMR (600 MHz,  $\text{CDCl}_3$ )  $\delta$  7.33 (s, 2H), 7.11 (s, 1H), 6.15 (brs, 1H), 2.92–2.87 (m, 1H), 2.34 (s, 6H), 0.90–0.84 (m, 2H), 0.63–0.58 (m, 2H);  $^{13}\text{C}$  NMR (126 MHz,  $\text{CDCl}_3$ )  $\delta$  169.2, 138.2, 134.4, 133.0, 124.6, 23.0, 21.2, 6.8; HRMS (ESI)  $m/z$  calcd for  $\text{C}_{12}\text{H}_{15}\text{NNaO}$   $[\text{M}+\text{Na}]^+$ : 212.1046, found 212.1045.

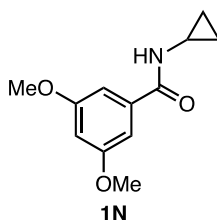

**N-Cyclopropyl-3,5-dimethoxybenzamide (1N):** The synthetic procedure of **1N** is the same as that of **1B**. 21.3 mmol scale. Purification by MPLC (hexane/ethyl acetate = 3:1 to 1:1); the obtained solid was crystallized from hexane and ethyl acetate to afford **1N** (932 mg, 21%) as a white solid.  $^1\text{H}$  NMR (600 MHz,  $\text{CDCl}_3$ )  $\delta$  6.85 (d,  $J$  = 1.8 Hz, 2H), 6.56 (dd,  $J$  = 1.8 Hz, 1H), 6.17 (brs, 1H), 3.82 (s, 6H), 2.92–2.86 (m, 1H), 0.90–0.83 (m, 2H), 0.64–0.57 (m, 2H);  $^{13}\text{C}$  NMR (151 MHz,  $\text{CDCl}_3$ )  $\delta$  168.7, 160.8, 136.6, 104.8, 103.5, 55.5, 23.1, 6.7; HRMS (ESI)  $m/z$  calcd for  $\text{C}_{12}\text{H}_{15}\text{NNaO}_3$   $[\text{M}+\text{Na}]^+$ : 244.0944, found 244.0942.

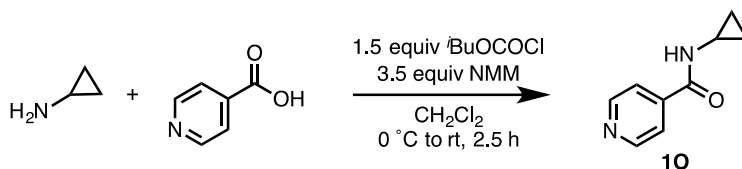

**N-Cyclopropylisonicotinamide (10):** To a mixture of isonicotinic acid (739 mg, 6.0 mmol) and 4-methylmorpholine (NMM: 1.3 mL, 12.0 mmol) in dichloromethane (15 mL) was slowly added isobutyl chloroformate (1.2 mL, 9.0 mmol) at 0 °C, and this mixture was stirred at the same temperature for 30 min. Cyclopropylamine (0.63 mL, 9.0 mmol) in dichloromethane (10 mL) and 4-methylmorpholine (NMM: 1.0 mL, 9.0 mmol) was slowly added at 0 °C. The reaction mixture was stirred at room temperature for 2 h. The reaction was quenched by adding saturated aqueous  $\text{NaHCO}_3$ , which was then extracted with dichloromethane. The combined organic layers were washed with brine, dried over  $\text{Na}_2\text{SO}_4$ , filtered and concentrated *in vacuo*. The residue was purified by Isolera<sup>®</sup> (hexane/ethyl acetate = 1:1 to 0:1). The obtained solid was washed by hexane to give **10** (772 mg, 79%) as a white solid.  $^1\text{H}$  NMR (600 MHz,  $\text{CDCl}_3$ )  $\delta$  8.73 (dd,  $J$  = 4.2, 1.8 Hz, 2H), 7.57 (dd,  $J$  = 4.2, 1.8 Hz, 2H), 6.30 (brs, 1H), 2.95–2.90 (m, 1H), 0.95–0.87 (m, 2H), 0.68–0.62 (m, 2H);  $^{13}\text{C}$  NMR (126 MHz,  $\text{CDCl}_3$ )  $\delta$  167.0, 150.4, 141.4, 120.8, 23.2, 6.6; HRMS (ESI)  $m/z$  calcd for  $\text{C}_9\text{H}_{10}\text{N}_2\text{NaO}$   $[\text{M}+\text{Na}]^+$ : 185.0685, found 185.0687.

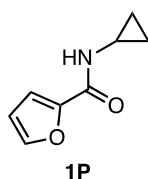

***N*-Cyclopropylfuran-2-carboxamide (1P):** The synthetic procedure of **1P** is the same as that of **1H**. 20.0 mmol scale. Purification by MPLC (hexane/ethyl acetate = 3:1 to 1:1); the obtained solid was crystallized from hexane and ethyl acetate to afford **1P** (1.7 g, 57%) as a white solid. <sup>1</sup>H NMR (600 MHz, CDCl<sub>3</sub>) δ 7.40 (s, 1H), 7.11 (d, *J* = 3.6 Hz, 1H), 6.49 (dd, *J* = 3.6, 1.2 Hz, 1H), 6.41 (brs, 1H), 2.89–2.84 (m, 1H), 0.89–0.82 (m, 2H), 0.66–0.59 (m, 2H); <sup>13</sup>C NMR (151 MHz, CDCl<sub>3</sub>) δ 159.6, 148.0, 143.7, 114.0, 112.1, 22.2, 6.7; HRMS (ESI) *m/z* calcd for C<sub>8</sub>H<sub>9</sub>NNaO<sub>2</sub> [M+Na]<sup>+</sup>: 174.0525, found 174.0521.

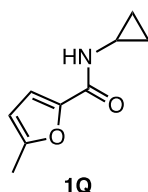

***N*-Cyclopropyl-5-methylfuran-2-carboxamide (1Q):** The synthetic procedure of **1Q** is the same as that of **1E**. 5.0 mmol scale. Purification by Isolera<sup>®</sup> (hexane/ethyl acetate = 1:1 to 0:1); the obtained solid was crystallized from hexane and ethyl acetate to afford **1Q** (538 mg, 65%) as a white solid. <sup>1</sup>H NMR (600 MHz, CDCl<sub>3</sub>) δ 7.00 (d, *J* = 3.6 Hz, 1H), 6.33 (brs, 1H), 6.08 (d, *J* = 3.6 Hz, 1H), 2.88–2.83 (m, 1H), 2.32 (s, 3H), 0.87–0.81 (m, 2H), 0.64–0.59 (m, 2H); <sup>13</sup>C NMR (126 MHz, CDCl<sub>3</sub>) δ 159.7, 154.2, 146.4, 115.3, 108.5, 22.2, 13.8, 6.7; HRMS (ESI) *m/z* calcd for C<sub>9</sub>H<sub>11</sub>NNaO<sub>2</sub> [M+Na]<sup>+</sup>: 188.0682, found 188.0682.

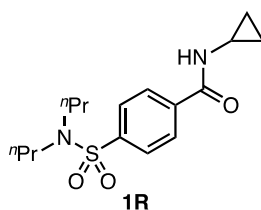

***N*-Cyclopropyl-4-(*N,N*-dipropylsulfamoyl)benzamide (1R):** The synthetic procedure of **1R** is the same as that of **1E**. 2.5 mmol scale. Purification by Isolera<sup>®</sup> (hexane/ethyl acetate = 1:1 to 0:1); the obtained solid was crystallized from hexane to afford **1R** (561 mg, 69%) as a white solid. <sup>1</sup>H NMR (600 MHz, CDCl<sub>3</sub>) δ 7.83 (s, 4H), 6.34 (brs, 1H), 3.08 (t, *J* = 7.8 Hz, 4H), 2.95–2.90 (m, 1H), 1.54 (sext, *J* = 7.8 Hz, 4H), 0.93–0.88 (m, 2H), 0.87 (t, *J* = 7.8 Hz, 6H), 0.68–0.63 (m, 2H); <sup>13</sup>C NMR (151 MHz, CDCl<sub>3</sub>) δ 167.7, 142.5, 138.1, 127.7, 127.0, 49.9, 23.3, 21.8, 11.1, 6.5; HRMS (ESI) *m/z* calcd for C<sub>16</sub>H<sub>24</sub>N<sub>2</sub>NaO<sub>3</sub>S [M+Na]<sup>+</sup>: 347.1400, found 347.1396.

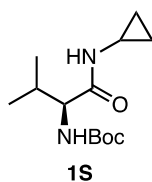

**tert-Butyl (S)-(1-(cyclopropylamino)-3-methyl-1-oxobutan-2-yl)carbamate (1S):** The synthetic procedure of **1S** is the same as that of **1E**. 4.0 mmol scale. Purification by Isolera® (hexane/ethyl acetate = 2:1 to 0:1); the obtained solid was crystallized from hexane and ethyl acetate to afford **1S** (715 mg, 72%) as a white solid. <sup>1</sup>H NMR (600 MHz, 90 °C, DMSO-*d*<sub>6</sub>) δ 7.62 (brs, 1H), 6.08 (brs, 1H), 3.72–3.68 (m, 1H), 2.67–2.61 (m, 1H), 1.93–1.86 (m, 1H), 1.40 (s, 9H), 0.85 (d, *J* = 6.8 Hz, 3H), 0.83 (d, *J* = 6.9 Hz, 3H), 0.65–0.59 (m, 2H), 0.46–0.37 (m, 2H); <sup>13</sup>C NMR (151 MHz, 90 °C, DMSO-*d*<sub>6</sub>) δ 171.8, 154.8, 77.7, 59.4, 30.2, 27.7, 21.7, 18.6, 17.6, 5.1, 5.0; HRMS (ESI) *m/z* calcd for C<sub>13</sub>H<sub>24</sub>N<sub>2</sub>NaO<sub>3</sub> [M+Na]<sup>+</sup>: 279.1679, found 279.1675.

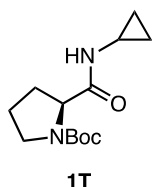

**tert-Butyl (S)-2-(cyclopropylcarbamoyl)pyrrolidine-1-carboxylate (1T):** The synthetic procedure of **1T** is the same as that of **1E**. 5.0 mmol scale. Purification by Isolera® (hexane/ethyl acetate = 2:1 to 0:1); the obtained solid was crystallized from hexane and ethyl acetate to afford **1T** (715 mg, 72%) as a white solid. <sup>1</sup>H NMR (500 MHz, 90 °C, DMSO-*d*<sub>6</sub>) δ 7.53 (brs, 1H), 4.01–3.95 (m, 1H), 3.40–3.34 (m, 1H), 3.33–3.27 (m, 1H), 2.66–2.60 (m, 1H), 2.09–2.01 (m, 1H), 1.87–1.70 (m, 3H), 1.38 (s, 9H), 0.65–0.58 (m, 2H), 0.47–0.38 (m, 2H); <sup>13</sup>C NMR (126 MHz, 90 °C, DMSO-*d*<sub>6</sub>) δ 172.8, 153.1, 78.0, 59.3, 46.1, 30.0, 27.7, 22.9, 21.8, 5.0; HRMS (ESI) *m/z* calcd for C<sub>13</sub>H<sub>22</sub>N<sub>2</sub>NaO<sub>3</sub> [M+Na]<sup>+</sup>: 277.1523, found 277.1518.

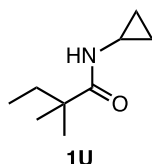

**N-Cyclopropyl-2,2-dimethylbutanamide (1U):** The synthetic procedure of **1U** is the same as that of **1B**. 9.5 mmol scale. Purification by MPLC (hexane/ethyl acetate = 3:2 to 0:1) to afford **1T** (1.0 g, 86%) as a yellow oil. <sup>1</sup>H NMR (500 MHz, CDCl<sub>3</sub>) δ 5.68 (brs, 1H), 2.73–2.67 (m, 1H), 1.52 (q, *J* = 7.5 Hz, 2H), 1.12 (s, 6H), 0.82 (t, *J* = 7.5 Hz, 3H), 0.79–0.74 (m, 2H), 0.47–0.42 (m, 2H); <sup>13</sup>C NMR (126 MHz,



CDCl<sub>3</sub>)  $\delta$  179.1, 42.1, 33.8, 24.8, 22.6, 9.1, 6.6; HRMS (ESI)  $m/z$  calcd for C<sub>9</sub>H<sub>17</sub>NNaO [M+Na]<sup>+</sup>: 178.1202, found 178.1204.

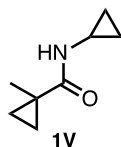

**N-Cyclopropyl-1-methylcyclopropane-1-carboxamide (1V):** The synthetic procedure of **1V** is the same as that of **1B**. 6.2 mmol scale. Purification by Isolera<sup>®</sup> (hexane/ethyl acetate = 2:1 to 0:1); the obtained solid was crystallized from hexane to afford **1V** (289 mg, 34%) as a white solid. <sup>1</sup>H NMR (600 MHz, CDCl<sub>3</sub>)  $\delta$  5.83 (brs, 1H), 2.74–2.68 (m, 1H), 1.27 (s, 3H), 1.21–1.17 (m, 2H), 0.79–0.74 (m, 2H), 0.56–0.53 (m, 2H), 0.51–0.47 (m, 2H); <sup>13</sup>C NMR (151 MHz, CDCl<sub>3</sub>)  $\delta$  176.2, 23.0, 19.7, 18.9, 16.0, 6.6; HRMS (ESI)  $m/z$  calcd for C<sub>8</sub>H<sub>13</sub>NNaO [M+Na]<sup>+</sup>: 162.0889, found 162.0886.

### 3. General Procedure for the Hydrosilylation of Aminocyclopropanes with [Rh(cod)Cl]<sub>2</sub>/P(1-nap)<sub>3</sub> Catalyst

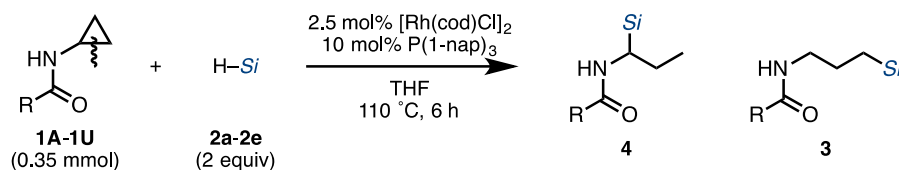

A 20 mL glass vessel tube equipped with a J. Young® O-ring tap containing a magnetic stirring bar was dried with a heat gun under reduced pressure and filled with nitrogen after cooling to room temperature. To this vessel was added aminocyclopropane (0.35 mmol), [Rh(cod)Cl]<sub>2</sub> (4.3 mg, 8.8 μmol, 2.5 mol%), and (P(1-nap)<sub>3</sub>) (14.4 mg, 0.035 mmol, 10 mol%), after which it was introduced inside an argon atmosphere glovebox. In the glovebox, silane (0.70 mmol, 2 equiv) and THF (2.0 mL) were added to the vessel. After the vessel was sealed with the O-ring tap, the vessel was taken out of the glovebox. The mixture was heated at 110 °C for 6 h in an 8-well reaction block with stirring. After cooling the reaction mixture to room temperature, the mixture was concentrated *in vacuo*. The residue was purified by Isolera® to afford aminosilane **4**. The branch/linear (**4/3**) ratio was determined by <sup>1</sup>H NMR analysis of the crude product.

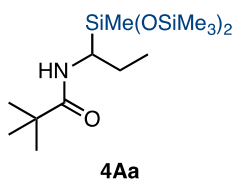

**N-(1-(1,1,1,3,5,5,5-Heptamethyltrisiloxan-3-yl)propyl)pivalamide (4Aa):** Purification by Isolera® (hexane/ethyl acetate = 1:0 to 5:1) afforded **4Aa** as a yellow oil (103.4 mg, 81%, branch/linear = 90:10). <sup>1</sup>H NMR (600 MHz, CDCl<sub>3</sub>) δ 5.45 (d, *J* = 8.4 Hz, 1H), 3.32 (td, *J* = 9.6, 4.8 Hz, 1H), 1.68–1.60 (m, 1H), 1.39–1.30 (m, 1H), 1.20 (s, 9H), 0.90 (t, *J* = 7.8 Hz, 3H), 0.12 (s, 9H), 0.11 (s, 9H), 0.052 (s, 3H); <sup>13</sup>C NMR (151 MHz, CDCl<sub>3</sub>) δ 177.9, 40.9, 38.7, 27.7, 23.6, 11.4, 1.81, 1.79, -1.6; HRMS (DART) *m/z* calcd for C<sub>15</sub>H<sub>38</sub>NO<sub>3</sub>Si<sub>3</sub> [M+H]<sup>+</sup>: 364.2154, found 364.2153.

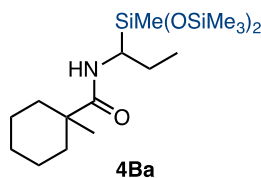

**N-(1-(1,1,1,3,5,5,5-Heptamethyltrisiloxan-3-yl)propyl)-1-methylcyclohexane-1-carboxamide (4Ba):** Purification by Isolera® (hexane/ethyl acetate = 1:0 to 5:1) afforded **4Ba** as a colorless oil (117.3 mg, 83%, branch/linear = 90:10). <sup>1</sup>H NMR (400 MHz, CDCl<sub>3</sub>) δ 5.48 (d, *J* = 10.0 Hz, 1H), 3.36 (td, *J* = 9.6, 4.8 Hz,

1H), 1.97–1.87 (m, 2H), 1.71–1.24 (m, 10H), 1.14 (s, 3H), 0.91 (t,  $J = 7.6$  Hz, 3H), 0.12 (s, 9H), 0.11 (s, 9H), 0.055 (s, 3H);  $^{13}\text{C}$  NMR (151 MHz,  $\text{CDCl}_3$ )  $\delta$  177.0, 42.8, 40.7, 35.9, 35.8, 27.0, 25.9, 23.7, 23.0, 11.6, 1.82, 1.78, -1.5; HRMS (DART)  $m/z$  calcd for  $\text{C}_{18}\text{H}_{42}\text{NO}_3\text{Si}_3$   $[\text{M}+\text{H}]^+$ : 404.2467, found 404.2470.

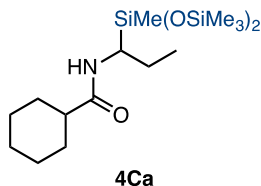

***N*-(1-( $\lambda^1$ -Silyl)propyl)cyclohexanecarboxamide (4Ca):** Purification by Isolera<sup>®</sup> (hexane/ethyl acetate = 1:0 to 5:1) afforded **4Ca** as a white solid (92.6 mg, 68%, branch/linear = 78:22).  $^1\text{H}$  NMR (600 MHz,  $\text{CDCl}_3$ )  $\delta$  5.18 (d,  $J = 9.6$  Hz, 1H), 3.32 (td,  $J = 9.6, 4.8$  Hz, 1H), 2.10–2.03 (m, 1H), 1.91–1.83 (m, 2H), 1.82–1.75 (m, 2H), 1.71–1.58 (m, 2H), 1.48–1.17 (m, 6H), 0.90 (t,  $J = 7.2$  Hz, 3H), 0.114 (s, 9H), 0.111 (s, 9H), 0.049 (s, 3H);  $^{13}\text{C}$  NMR (151 MHz,  $\text{CDCl}_3$ )  $\delta$  175.6, 46.0, 40.9, 30.0, 29.9, 25.8, 23.6, 11.5, 1.80, 1.77, -1.7; HRMS (DART)  $m/z$  calcd for  $\text{C}_{17}\text{H}_{40}\text{NO}_3\text{Si}_3$   $[\text{M}+\text{H}]^+$ : 390.2311, found 390.2311.

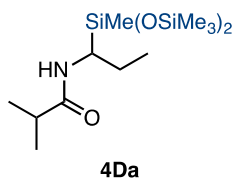

***N*-(1-(1,1,1,3,5,5,5-Heptomethyltrisiloxan-3-yl)propyl)isobutyramide (4Da):** Purification by Isolera<sup>®</sup> (hexane/ethyl acetate = 1:0 to 5:1) afforded **4Da** as a yellow solid (86.5 mg, 71%). The branch/linear ratio couldn't be determined because of the peak overlap.  $^1\text{H}$  NMR (600 MHz,  $\text{CDCl}_3$ )  $\delta$  5.18 (d,  $J = 7.8$  Hz, 1H), 3.32 (td,  $J = 9.6, 4.8$  Hz, 1H), 2.38–2.31 (m, 1H), 1.68–1.59 (m, 1H), 1.39–1.31 (m, 1H), 1.17 (d,  $J = 7.2$  Hz, 3H), 1.16 (d,  $J = 7.2$  Hz, 3H), 0.91 (t,  $J = 7.2$  Hz, 3H), 0.12 (s, 9H), 0.11 (s, 9H), 0.055 (s, 3H);  $^{13}\text{C}$  NMR (151 MHz,  $\text{CDCl}_3$ )  $\delta$  176.4, 40.9, 36.0, 23.6, 19.83, 19.76, 11.5, 1.77, 1.75, -1.7; HRMS (DART)  $m/z$  calcd for  $\text{C}_{14}\text{H}_{36}\text{NO}_3\text{Si}_3$   $[\text{M}+\text{H}]^+$ : 350.1997, found 350.2003.

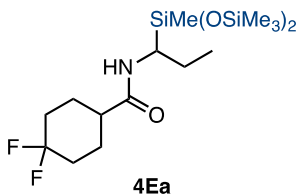

**4,4-Difluoro-*N*-(1-(1,1,1,3,5,5,5-heptomethyltrisiloxan-3-yl)propyl)cyclohexane-1-carboxamide (4Ea):** The reaction was performed using  $[\text{Rh}(\text{cod})\text{OMe}]_2$  (2.1 mg, 4.4  $\mu\text{mol}$ , 1.25 mol%) and P(1-nap)<sub>3</sub> (7.2 mg, 17.5  $\mu\text{mol}$ , 5 mol%). Purification by Isolera<sup>®</sup> (hexane/ethyl acetate = 1:0 to 5:1) afforded **4Ea** as

a white solid (77.3 mg, 52%, branch/linear = 56:44).  $^1\text{H}$  NMR (400 MHz,  $\text{CDCl}_3$ )  $\delta$  5.20 (d,  $J$  = 9.6 Hz, 1H), 3.33 (td,  $J$  = 9.6, 5.2 Hz, 1H), 2.24–2.11 (m, 3H), 1.99–1.55 (m, 7H), 1.42–1.25 (m, 1H), 0.90 (t,  $J$  = 7.2 Hz, 3H), 0.12 (s, 9H), 0.11 (s, 9H), 0.055 (s, 3H);  $^{13}\text{C}$  NMR (101 MHz,  $\text{CDCl}_3$ )  $\delta$  173.5, 122.7 (t,  $J$  = 244.2 Hz), 43.3, 41.2, 32.9 (t,  $J$  = 24.8 Hz), 26.1 (t,  $J$  = 8.6 Hz), 23.6, 11.5, 1.82, 1.79, -1.6; HRMS (DART)  $m/z$  calcd for  $\text{C}_{17}\text{H}_{38}\text{F}_2\text{NO}_3\text{Si}_3$   $[\text{M}+\text{H}]^+$ : 426.2122, found 426.2124.

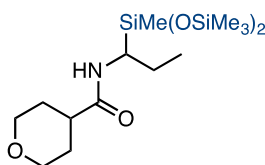

**4Fa**

***N*-(1-(1,1,1,3,5,5,5-Heptamethyltrisiloxan-3-yl)propyl)tetrahydro-2*H*-pyran-4-carboxamide (4Fa):**

The reaction was performed using  $[\text{Rh}(\text{cod})\text{OMe}]_2$  (2.1 mg, 4.4  $\mu\text{mol}$ , 1.25 mol%) and  $\text{P}(1\text{-nap})_3$  (7.2 mg, 17.5  $\mu\text{mol}$ , 5 mol%). Purification by Isolera<sup>®</sup> (hexane/ethyl acetate = 1:0 to 5:1) afforded **4Fa** as a white solid (76.0 mg, 55%). The branch/linear ratio couldn't be determined because of the peak overlap.  $^1\text{H}$  NMR (600 MHz,  $\text{CDCl}_3$ )  $\delta$  5.21 (d,  $J$  = 9.6 Hz, 1H), 4.05–4.00 (m, 2H), 3.43 (td,  $J$  = 11.4, 3.0 Hz, 2H), 3.34 (td,  $J$  = 9.6, 4.8 Hz, 1H), 2.37–2.30 (m, 1H), 1.85–1.72 (m, 4H), 1.68–1.60 (m, 1H), 1.40–1.30 (m, 1H), 0.90 (t,  $J$  = 7.8 Hz, 3H), 0.12 (s, 9H), 0.11 (s, 9H), 0.056 (s, 3H);  $^{13}\text{C}$  NMR (151 MHz,  $\text{CDCl}_3$ )  $\delta$  173.8, 67.4, 42.6, 41.1, 29.6, 23.6, 11.5, 1.84, 1.81, -1.6; HRMS (DART)  $m/z$  calcd for  $\text{C}_{16}\text{H}_{38}\text{NO}_4\text{Si}_3$   $[\text{M}+\text{H}]^+$ : 392.2103, found 392.2101.

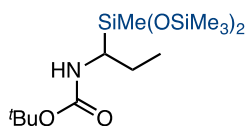

**4Ga**

***tert*-butyl (1-(1,1,1,3,5,5,5-Heptamethyltrisiloxan-3-yl)propyl)carbamate (4Ga):** Purification by Isolera<sup>®</sup> (hexane/ethyl acetate = 1:0 to 5:1) afforded **4Ga** as a colorless oil (92.1 mg, 69%). The branch/linear ratio couldn't be determined because of the peak overlap.  $^1\text{H}$  NMR (600 MHz, 120  $^\circ\text{C}$ ,  $\text{DMSO}-d_6$ )  $\delta$  5.53 (brs, 1H), 2.72 (td,  $J$  = 9.6, 4.8 Hz, 1H), 1.58–1.50 (m, 1H), 1.44–1.35 (m, 10H), 0.90 (t,  $J$  = 7.2 Hz, 3H), 0.13–0.10 (m, 18H), 0.072 (s, 3H);  $^{13}\text{C}$  NMR (151 MHz, 120  $^\circ\text{C}$ ,  $\text{DMSO}-d_6$ )  $\delta$  155.3, 76.8, 42.6, 27.7, 22.7, 10.8, 1.0, -2.5; HRMS (DART)  $m/z$  calcd for  $\text{C}_{15}\text{H}_{38}\text{NO}_4\text{Si}_3$   $[\text{M}+\text{H}]^+$ : 380.2103, found 380.2101.

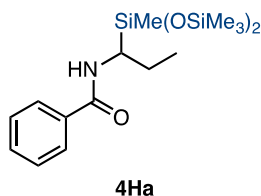

***N*-(1-(1,1,1,3,5,5,5-Heptamethyltrisiloxan-3-yl)propyl)benzamide (4Ha):** Purification by Isolera<sup>®</sup> (hexane/ethyl acetate = 1:0 to 5:1) afforded **4Ha** as a white solid (73.8 mg, 55%). When the reaction was performed using [Rh(cod)OMe]<sub>2</sub> (2.1 mg, 4.4 μmol, 1.25 mol%) and P(1-nap)<sub>3</sub> (7.2 mg, 17.5 μmol, 5 mol%), **4Ha** was obtained in 66% yield (88.9 mg, branch/linear = 78:22). <sup>1</sup>H NMR (600 MHz, CDCl<sub>3</sub>) δ 7.75–7.72 (m, 2H), 7.50–7.46 (m, 1H), 7.45–7.41 (m, 2H), 5.90 (d, *J* = 9.0 Hz, 1H), 3.55 (td, *J* = 9.6, 4.8 Hz, 1H), 1.79–1.71 (m, 1H), 1.52–1.44 (m, 1H), 0.98 (t, *J* = 7.3 Hz, 3H), 0.13 (s, 9H), 0.12 (s, 3H), 0.11 (s, 9H); <sup>13</sup>C NMR (151 MHz, CDCl<sub>3</sub>) δ 167.3, 135.5, 131.0, 128.5, 126.6, 42.0, 23.8, 11.7, 1.8, -1.5; HRMS (DART) *m/z* calcd for C<sub>17</sub>H<sub>34</sub>NO<sub>3</sub>Si<sub>3</sub> [M+H]<sup>+</sup>: 384.1841, found 384.1846.

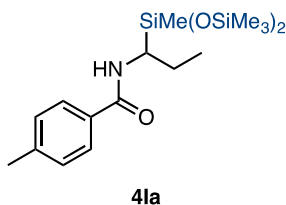

***N*-(1-(1,1,1,3,5,5,5-Heptamethyltrisiloxan-3-yl)propyl)-4-methylbenzamide (4Ia):** The reaction was performed using [Rh(cod)OMe]<sub>2</sub> (2.1 mg, 4.4 μmol, 1.25 mol%) and P(1-nap)<sub>3</sub> (7.2 mg, 17.5 μmol, 5 mol%). Purification by Isolera<sup>®</sup> (hexane/ethyl acetate = 1:0 to 5:1) afforded **4Ia** as a colorless oil (90.8 mg, 65%, branch/linear = 82:18). <sup>1</sup>H NMR (600 MHz, CDCl<sub>3</sub>) δ 7.64 (d, *J* = 8.4 Hz, 2H), 7.23 (d, *J* = 8.4 Hz, 2H), 5.88 (d, *J* = 9.6 Hz, 1H), 3.54 (td, *J* = 9.6, 4.8 Hz, 1H), 2.39 (s, 3H), 1.78–1.69 (m, 1H), 1.52–1.42 (m, 1H), 0.97 (t, *J* = 7.2 Hz, 3H), 0.13 (s, 9H), 0.11 (s, 3H), 0.10 (s, 9H); <sup>13</sup>C NMR (151 MHz, CDCl<sub>3</sub>) δ 167.3, 141.3, 132.6, 129.2, 126.6, 41.9, 23.8, 21.4, 11.7, 1.8, -1.5; HRMS (DART) *m/z* calcd for C<sub>18</sub>H<sub>36</sub>NO<sub>3</sub>Si<sub>3</sub> [M+H]<sup>+</sup>: 398.1997, found 398.1997.

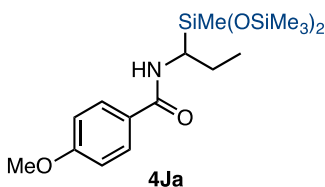

***N*-(1-(1,1,1,3,5,5,5-Heptamethyltrisiloxan-3-yl)propyl)-4-methoxybenzamide (4Ja):** The reaction was performed using [Rh(cod)OMe]<sub>2</sub> (2.1 mg, 4.4 μmol, 1.25 mol%) and P(1-nap)<sub>3</sub> (7.2 mg, 17.5 μmol, 5 mol%). Purification by Isolera<sup>®</sup> (hexane/ethyl acetate = 1:0 to 5:1) afforded **4Ja** as a colorless oil (92.8 mg, 64%, branch/linear = 82:18). <sup>1</sup>H NMR (600 MHz, CDCl<sub>3</sub>) δ 7.71 (d, *J* = 9.0 Hz, 2H), 6.93 (d, *J* = 9.0

Hz, 2H), 5.84 (d,  $J$  = 10.2 Hz, 1H), 3.85 (s, 3H), 3.53 (td,  $J$  = 9.6, 4.8 Hz, 1H), 1.78–1.68 (m, 1H), 1.52–1.43 (m, 1H), 0.97 (t,  $J$  = 7.2 Hz, 3H), 0.13 (s, 9H), 0.110 (s, 3H), 0.105 (s, 9H);  $^{13}\text{C}$  NMR (151 MHz,  $\text{CDCl}_3$ )  $\delta$  166.8, 161.9, 128.3, 127.7, 113.7, 55.4, 41.8, 23.9, 11.7, 1.8, -1.5; HRMS (DART)  $m/z$  calcd for  $\text{C}_{18}\text{H}_{36}\text{NO}_4\text{Si}_3$   $[\text{M}+\text{H}]^+$ : 414.1947, found 414.1950.

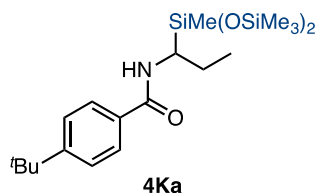

**4-(*tert*-Butyl)-*N*-(1-(1,1,1,3,5,5,5-heptamethyltrisiloxan-3-yl)propyl)benzamide (4Ka):** Purification by Isolera<sup>®</sup> (hexane/ethyl acetate = 1:0 to 5:1) afforded **4Ka** as a colorless oil (99.0 mg, 65%, branch/linear = 82:18). When the reaction was performed using  $[\text{Rh}(\text{cod})\text{OMe}]_2$  (2.1 mg, 4.4  $\mu\text{mol}$ , 1.25 mol%) and  $\text{P}(\text{1-nap})_3$  (7.2 mg, 17.5  $\mu\text{mol}$ , 5 mol%), **4Ha** was obtained in 79% (122.0 mg, branch/linear = 79:21).  $^1\text{H}$  NMR (600 MHz,  $\text{CDCl}_3$ )  $\delta$  7.68 (d,  $J$  = 8.6 Hz, 2H), 7.45 (d,  $J$  = 8.6 Hz, 2H), 5.89 (d,  $J$  = 9.0 Hz, 1H), 3.55 (td,  $J$  = 9.6, 4.8 Hz, 1H), 1.78–1.70 (m, 1H), 1.51–1.43 (m, 1H), 1.34 (s, 9H), 0.97 (t,  $J$  = 7.4 Hz, 3H), 0.14 (s, 9H), 0.12 (s, 9H), 0.11 (s, 3H);  $^{13}\text{C}$  NMR (151 MHz,  $\text{CDCl}_3$ )  $\delta$  167.2, 154.4, 132.5, 126.4, 125.4, 41.8, 34.8, 31.1, 23.8, 11.7, 1.8, -1.6; HRMS (DART)  $m/z$  calcd for  $\text{C}_{21}\text{H}_{42}\text{NO}_3\text{Si}_3$   $[\text{M}+\text{H}]^+$ : 440.2467, found 440.2466.

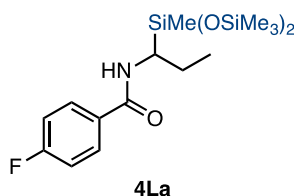

**4-Fluoro-*N*-(1-(1,1,1,3,5,5,5-heptamethyltrisiloxan-3-yl)propyl)benzamide (4La):** Purification by Isolera<sup>®</sup> (hexane/ethyl acetate = 1:0 to 5:1) afforded **4La** as a yellow oil (84.5 mg, 60%, branch/linear = 72:28).  $^1\text{H}$  NMR (600 MHz,  $\text{CDCl}_3$ )  $\delta$  7.76–7.72 (m, 2H), 7.13–7.08 (m, 2H), 5.83 (d,  $J$  = 9.6 Hz, 1H), 3.53 (td,  $J$  = 9.0, 4.8 Hz, 1H), 1.78–1.70 (m, 1H), 1.52–1.43 (m, 1H), 0.98 (t,  $J$  = 7.8 Hz, 3H), 0.15–0.08 (m, 21H);  $^{13}\text{C}$  NMR (151 MHz,  $\text{CDCl}_3$ )  $\delta$  166.3, 164.5 (d,  $J_{\text{FC}}$  = 248.6 Hz), 131.6 (d,  $J_{\text{FC}}$  = 2.9 Hz), 128.8 (d,  $J_{\text{FC}}$  = 8.7 Hz), 115.5 (d,  $J_{\text{FC}}$  = 21.5 Hz), 42.1, 23.8, 11.7, 1.8, -1.5; HRMS (DART)  $m/z$  calcd for  $\text{C}_{17}\text{H}_{33}\text{FNO}_3\text{Si}_3$   $[\text{M}+\text{H}]^+$ : 402.1747, found 402.1745.

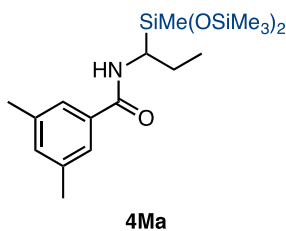

***N*-(1-(1,1,1,3,5,5,5-Heptamethyltrisiloxan-3-yl)propyl)-3,5-dimethylbenzamide (4Ma):** Purification by Isolera<sup>®</sup> (hexane/ethyl acetate = 1:0 to 5:1) afforded **4Ma** as a white solid (113.6 mg, 79%). The branch/linear ratio couldn't be determined because of the peak overlap. <sup>1</sup>H NMR (600 MHz, CDCl<sub>3</sub>) δ 7.34 (s, 2H), 7.11 (s, 1H), 5.89 (d, *J* = 10.2 Hz, 1H), 3.53 (td, *J* = 9.6, 4.8 Hz, 1H), 2.35 (s, 6H), 1.78–1.70 (m, 1H), 1.51–1.43 (m, 1H), 0.97 (t, *J* = 7.8 Hz, 3H), 0.14 (s, 9H), 0.12 (s, 9H), 0.11 (s, 3H); <sup>13</sup>C NMR (151 MHz, CDCl<sub>3</sub>) δ 167.7, 138.2, 135.4, 132.6, 124.4, 41.8, 23.8, 21.2, 11.7, 1.8, -1.5; HRMS (DART) *m/z* calcd for C<sub>19</sub>H<sub>38</sub>NO<sub>3</sub>Si<sub>3</sub> [M+H]<sup>+</sup>: 412.2154, found 412.2152.

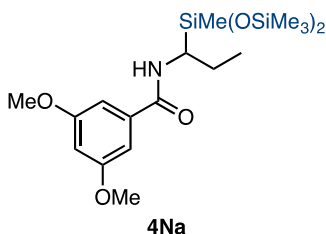

***N*-(1-(1,1,1,3,5,5,5-Heptamethyltrisiloxan-3-yl)propyl)-3,5-dimethoxybenzamide (4Na):** Purification by Isolera<sup>®</sup> (hexane/ethyl acetate = 1:0 to 5:1) afforded **4Na** as a white solid (108.0 mg, 70%, branch/linear = 83:17). <sup>1</sup>H NMR (600 MHz, CDCl<sub>3</sub>) δ 6.87 (d, *J* = 2.4 Hz, 2H), 6.57–6.56 (m, 1H), 5.86 (d, *J* = 9.6 Hz, 1H), 3.83 (s, 6H), 3.52 (td, *J* = 9.6, 4.8 Hz, 1H), 1.78–1.70 (m, 1H), 1.51–1.42 (m, 1H), 0.98 (t, *J* = 7.2 Hz, 3H), 0.14–0.10 (m, 21H); <sup>13</sup>C NMR (151 MHz, CDCl<sub>3</sub>) δ 167.2, 160.9, 137.7, 104.6, 103.2, 55.5, 42.1, 23.8, 11.7, 1.8, -1.6; HRMS (DART) *m/z* calcd for C<sub>19</sub>H<sub>38</sub>NO<sub>5</sub>Si<sub>3</sub> [M+H]<sup>+</sup>: 444.2052, found 444.2052.

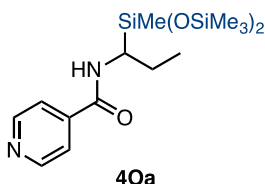

***N*-(1-(1,1,1,3,5,5,5-Heptamethyltrisiloxan-3-yl)propyl)isonicotinamide (4Oa):** The reaction was stirred for 18 h. Purification by Isolera<sup>®</sup> (hexane/ethyl acetate = 1:0 to 5:1) afforded **4Oa** as a yellow oil (72.9 mg, 51%, branch/linear = 80:20). <sup>1</sup>H NMR (600 MHz, CDCl<sub>3</sub>) δ 8.74 (dd, *J* = 4.2, 1.8 Hz, 2H), 7.57 (dd, *J* = 4.2, 1.8 Hz, 2H), 5.95 (d, *J* = 9.6 Hz, 1H), 3.54 (td, *J* = 9.6, 4.8 Hz, 1H), 1.80–1.71 (m, 1H),

1.53–1.44 (m, 1H), 0.98 (t,  $J = 7.2$  Hz, 3H), 0.134 (s, 9H), 0.126 (s, 3H), 0.10 (s, 9H);  $^{13}\text{C}$  NMR (151 MHz,  $\text{CDCl}_3$ )  $\delta$  165.3, 150.6, 142.4, 120.6, 42.5, 23.7, 11.7, 1.8, -1.5; HRMS (DART)  $m/z$  calcd for  $\text{C}_{16}\text{H}_{33}\text{N}_2\text{O}_3\text{Si}_3$   $[\text{M}+\text{H}]^+$ : 385.1793, found 385.1795.

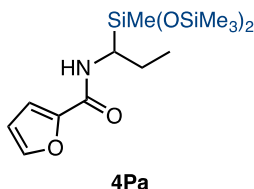

***N*-(1-(1,1,1,3,5,5,5-Heptamethyltrisiloxan-3-yl)propyl)furan-2-carboxamide (4Pa):** The reaction was stirred for 18 h. Purification by Isolera<sup>®</sup> (hexane/ethyl acetate = 1:0 to 5:1) afforded **4Pa** as a colorless oil (86.2 mg, 66%). The branch/linear ratio couldn't be determined because of the peak overlap.  $^1\text{H}$  NMR (600 MHz,  $\text{CDCl}_3$ )  $\delta$  7.42 (s, 1H), 7.07 (d,  $J = 3.6$  Hz, 1H), 6.49 (dd,  $J = 3.6, 1.8$  Hz, 1H), 6.17 (d,  $J = 10.2$  Hz, 1H), 3.48 (td,  $J = 9.6, 4.8$  Hz, 1H), 1.76–1.68 (m, 1H), 1.51–1.42 (m, 1H), 0.97 (t,  $J = 7.2$  Hz, 3H), 0.13 (s, 9H), 0.11 (s, 9H), 0.10 (s, 3H);  $^{13}\text{C}$  NMR (151 MHz,  $\text{CDCl}_3$ )  $\delta$  158.4, 148.5, 143.4, 113.5, 112.0, 41.1, 23.8, 11.7, 1.7, -1.6; HRMS (DART)  $m/z$  calcd for  $\text{C}_{15}\text{H}_{32}\text{NO}_4\text{Si}_3$   $[\text{M}+\text{H}]^+$ : 374.1634, found 374.1635.

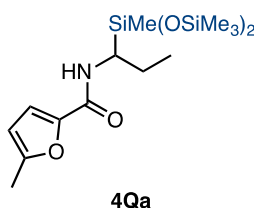

***N*-(1-(1,1,1,3,5,5,5-Heptamethyltrisiloxan-3-yl)propyl)-5-methylfuran-2-carboxamide (4Qa):** Purification by Isolera<sup>®</sup> (hexane/ethyl acetate = 1:0 to 5:1) afforded **4Qa** as a colorless oil (96.5 mg, 71%, branch/linear = 81:19).  $^1\text{H}$  NMR (500 MHz,  $\text{CDCl}_3$ )  $\delta$  6.96 (d,  $J = 3.0$  Hz, 1H), 6.12 (d,  $J = 10.0$  Hz, 1H), 6.08 (d,  $J = 3.0$  Hz, 1H), 3.47 (td,  $J = 9.5, 5.0$  Hz, 1H), 2.33 (s, 3H), 1.77–1.67 (m, 1H), 1.51–1.41 (m, 1H), 0.97 (t,  $J = 7.5$  Hz, 3H), 0.13 (s, 9H), 0.12 (s, 9H), 0.10 (s, 3H);  $^{13}\text{C}$  NMR (151 MHz,  $\text{CDCl}_3$ )  $\delta$  158.6, 153.9, 146.9, 114.6, 108.3, 40.9, 23.8, 13.7, 11.7, 1.7, -1.6; HRMS (DART)  $m/z$  calcd for  $\text{C}_{16}\text{H}_{34}\text{NO}_4\text{Si}_3$   $[\text{M}+\text{H}]^+$ : 388.1790, found 388.1790.

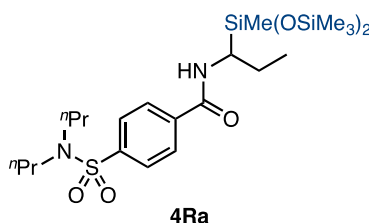



**4-(*N,N*-Dipropylsulfamoyl)-*N*-(1-(1,1,1,3,5,5,5-heptamethyltrisiloxan-3-yl)propyl)benzamide (4Ra):**

Purification by Isolera<sup>®</sup> (hexane/ethyl acetate = 1:0 to 5:1) afforded **4Ra** as a colorless oil (94.8 mg, 50%, branch/linear = 65:35). <sup>1</sup>H NMR (500 MHz, CDCl<sub>3</sub>) δ 7.89–7.81 (m, 4H), 5.91 (d, *J* = 10.0 Hz, 1H), 3.54 (td, *J* = 9.5, 5.0 Hz, 1H), 3.10 (t, *J* = 7.0 Hz, 4H), 1.80–1.71 (m, 1H), 1.60–1.45 (m, 5H), 0.99 (t, *J* = 7.5 Hz, 3H), 0.87 (t, *J* = 7.0 Hz, 6H), 0.14–0.080 (m, 21H); <sup>13</sup>C NMR (151 MHz, CDCl<sub>3</sub>) δ 166.0, 142.6, 138.9, 127.3, 49.9, 42.5, 23.7, 21.9, 11.8, 11.1, 1.8, -1.5; HRMS (DART) *m/z* calcd for C<sub>23</sub>H<sub>47</sub>N<sub>2</sub>O<sub>5</sub>SSi<sub>3</sub> [M+H]<sup>+</sup>: 547.2508, found 547.2507.

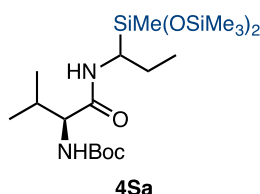

***tert*-Butyl ((2*S*)-1-((1-(1,1,1,3,5,5,5-heptamethyltrisiloxan-3-yl)propyl)amino)-3-methyl-1-oxobutan-2-yl)carbamate (4Sa):**

The reaction was performed using [Rh(cod)OMe]<sub>2</sub> (2.1 mg, 4.4 μmol, 1.25 mol%) and P(1-nap)<sub>3</sub> (7.2 mg, 17.5 μmol, 5 mol%) for 18 h. Purification by Isolera<sup>®</sup> (hexane/ethyl acetate = 1:0 to 5:1) afforded **4Sa** as a white solid (87.0 mg, 52%, mixture of diastereomers). The branch/linear ratio couldn't be determined because of the peak overlap. <sup>1</sup>H NMR (600 MHz, 60 °C, CDCl<sub>3</sub>) δ 5.64–5.53 (m, 1H), 4.95 (brs, 1H), 3.86–3.80 (m, 1H), 3.35–3.28 (m, 1H), 2.20–2.11 (m, 1H), 1.69–1.60 (m, 1H), 1.44–1.43 (m, 9H), 1.41–1.32 (m, 1H), 0.96 (t, *J* = 7.2 Hz, 3H), 0.94–0.88 (m, 6H), 0.13–0.11 (m, 18H), 0.080–0.040 (m, 3H); <sup>13</sup>C NMR (101 MHz, 60 °C, CDCl<sub>3</sub>) δ 171.3, 171.1, 155.8, 155.6, 79.6, 60.5, 41.5, 30.7, 30.6, 28.2, 23.51, 23.47, 19.34, 19.28, 17.9, 17.7, 11.7, 11.5, 1.7, -1.6, -1.8; HRMS (DART) *m/z* calcd for C<sub>20</sub>H<sub>47</sub>N<sub>2</sub>O<sub>5</sub>Si<sub>3</sub> [M+H]<sup>+</sup>: 479.2787, found 479.2786.

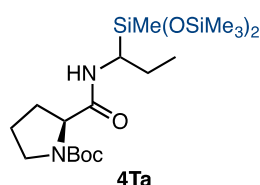

***tert*-Butyl (2*S*)-2-((1-(1,1,1,3,5,5,5-heptamethyltrisiloxan-3-yl)propyl)carbamoyl)pyrrolidine-1-carboxylate (4Ta):**

Purification by Isolera<sup>®</sup> (hexane/ethyl acetate = 1:0 to 5:1) afforded **4Ta** as a colorless oil (43.0 mg, 26%) and Diastereomer-**4Ta** (65.6 mg, 39%). The branch/linear ratio couldn't be determined because of the peak overlap. <sup>1</sup>H NMR (600 MHz, 120 °C, DMSO-*d*<sub>6</sub>) δ 6.72 (d, *J* = 8.4 Hz, 1H), 4.21 (dd, *J* = 8.4, 3.0 Hz, 1H), 3.38–3.32 (m, 2H), 3.09 (td, *J* = 9.0, 4.8 Hz, 1H), 2.07–1.99 (m, 1H), 1.97–1.90 (m, 1H), 1.88–1.76 (m, 2H), 1.63–1.55 (m, 1H), 1.44–1.36 (m, 10H), 0.89 (t, *J* = 7.2 Hz, 3H), 0.124 (s, 9H), 0.116 (s, 9H), 0.056 (s, 3H); <sup>13</sup>C NMR (151 MHz, 120 °C, DMSO-*d*<sub>6</sub>) δ 170.8, 153.5, 78.2,

59.2, 46.0, 41.1, 29.2, 27.6, 22.8, 22.4, 10.9, 1.0, -2.4; HRMS (DART)  $m/z$  calcd for  $C_{20}H_{45}N_2O_5Si_3$   $[M+H]^+$ : 477.2631, found 477.2635. Diastereomer-**4Ta**  $^1H$  NMR (600 MHz, 120 °C, DMSO- $d_6$ )  $\delta$  6.48 (d,  $J$  = 7.8 Hz, 1H), 4.18 (dd,  $J$  = 8.4, 3.0 Hz, 1H), 3.41–3.32 (m, 2H), 3.08 (td,  $J$  = 9.0, 4.8 Hz, 1H), 2.10–2.04 (m, 1H), 1.96–1.91 (m, 1H), 1.84–1.77 (m, 2H), 1.63–1.55 (m, 1H), 1.43–1.36 (m, 10H), 0.89 (t,  $J$  = 7.2 Hz, 3H), 0.122 (s, 9H), 0.117 (s, 9H), 0.059 (s, 3H);  $^{13}C$  NMR (151 MHz, 120 °C, DMSO- $d_6$ )  $\delta$  170.8, 153.5, 78.4, 59.7, 46.1, 41.0, 29.4, 27.6, 22.8, 22.4, 10.9, 1.0, -2.3; HRMS (DART)  $m/z$  calcd for  $C_{20}H_{45}N_2O_5Si_3$   $[M+H]^+$ : 477.2631, found 477.2639.

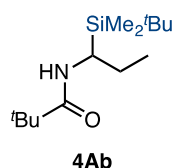

***N*-(1-(*tert*-Butyldimethylsilyl)propyl)pivalamide (4Ab):** Purification by Isolera<sup>®</sup> (hexane/ethyl acetate = 1:0 to 5:1) afforded **4Ab** as a yellow solid (41.1 mg, 46%, branch/linear = 84:16).  $^1H$  NMR (600 MHz,  $CDCl_3$ )  $\delta$  5.32 (d,  $J$  = 8.4 Hz, 1H), 3.65 (td,  $J$  = 10.2, 3.6 Hz, 1H), 1.71–1.63 (m, 1H), 1.41–1.31 (m, 1H), 1.21 (s, 9H), 0.94–0.88 (m, 12 H), 0.013 (s, 6H);  $^{13}C$  NMR (151 MHz,  $CDCl_3$ )  $\delta$  177.3, 38.8, 38.4, 27.7, 26.8, 25.3, 16.9, 11.7, -7.2, -7.8; HRMS (DART)  $m/z$  calcd for  $C_{14}H_{32}NOSi$   $[M+H]^+$ : 258.2248, found 258.2249.

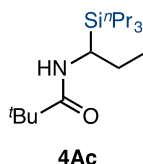

***N*-(1-(Tripropylsilyl)propyl)pivalamide (4Ac):** Purification by Isolera<sup>®</sup> (hexane/ethyl acetate = 1:0 to 5:1) afforded **4Ac** as a white solid (100.8 mg, 96%, branch/linear = 94:6).  $^1H$  NMR (600 MHz,  $CDCl_3$ )  $\delta$  5.27 (d,  $J$  = 10.2 Hz, 1H), 3.58 (td,  $J$  = 10.8, 3.6 Hz, 1H), 1.65–1.58 (m, 1H), 1.43–1.30 (m, 7H), 1.20 (s, 9H), 0.96 (t,  $J$  = 7.2 Hz, 9H), 0.90 (t,  $J$  = 7.2 Hz, 3H), 0.62–0.52 (m, 6H);  $^{13}C$  NMR (151 MHz,  $CDCl_3$ )  $\delta$  177.5, 39.3, 38.8, 27.8, 24.9, 18.7, 17.5, 14.0, 12.0; HRMS (DART)  $m/z$  calcd for  $C_{17}H_{38}NOSi$   $[M+H]^+$ : 300.2717, found 300.2719.

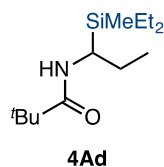

***N*-(1-(Diethyl(methyl)silyl)propyl)pivalamide (4Ad):** Purification by Isolera<sup>®</sup> (hexane/ethyl acetate = 1:0 to 5:1) afforded **4Ad** as a white solid (86.0 mg, 99%, branch/linear = >95:5). <sup>1</sup>H NMR (600 MHz, CDCl<sub>3</sub>) δ 5.27 (d, *J* = 8.4 Hz, 1H), 3.54 (td, *J* = 10.2, 3.6 Hz, 1H), 1.66–1.58 (m, 1H), 1.40–1.30 (m, 1H), 1.20 (s, 9H), 0.98–0.94 (m, 6H), 0.91 (t, *J* = 7.2 Hz, 3H), 0.63–0.50 (m, 4H), -0.023 (s, 3H); <sup>13</sup>C NMR (151 MHz, CDCl<sub>3</sub>) δ 177.6, 39.6, 38.8, 27.8, 24.5, 11.9, 7.42, 7.39, 3.68, 3.66, -7.8; HRMS (DART) *m/z* calcd for C<sub>13</sub>H<sub>30</sub>NOSi [M+H]<sup>+</sup>: 244.2091, found 244.2091.

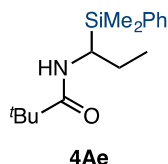

***N*-(1-(Dimethyl(phenyl)silyl)propyl)pivalamide (4Ae):** The reaction was performed using [Rh(cod)Cl]<sub>2</sub> (8.6 mg, 17.5 μmol, 5.0 mol%), and P(1-nap)<sub>3</sub> (28.8 mg, 0.070 mmol, 20 mol%) for 12 h. Purification by Isolera<sup>®</sup> (hexane/ethyl acetate = 1:0 to 5:1) afforded **4Ae** as a white solid (59.7 mg, 61%, branch/linear = 87:13). <sup>1</sup>H NMR (600 MHz, CDCl<sub>3</sub>) δ 7.51 (dd, *J* = 7.2, 2.4 Hz, 2H), 7.40–7.35 (m, 3H), 5.14 (d, *J* = 9.0 Hz, 1H), 3.63 (td, *J* = 10.8, 4.2 Hz, 1H), 1.66–1.59 (m, 1H), 1.33–1.24 (m, 1H), 1.13 (s, 9H), 0.86 (t, *J* = 7.2 Hz, 3H), 0.35 (s, 3H), 0.33 (s, 3H); <sup>13</sup>C NMR (151 MHz, CDCl<sub>3</sub>) δ 177.8, 136.3, 134.0, 129.4, 127.9, 40.7, 38.8, 27.7, 24.3, 11.9, -4.7, -5.0; HRMS (DART) *m/z* calcd for C<sub>16</sub>H<sub>28</sub>NOSi [M+H]<sup>+</sup>: 278.1935, found 278.1934.

#### 4. General Procedure for the Hydrosilylation of Aminocyclopropanes with [Rh(cod)Cl]<sub>2</sub>/PCy<sub>3</sub>·HBF<sub>4</sub> Catalyst

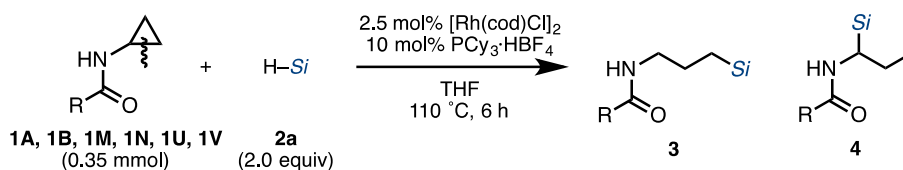

A 20 mL glass vessel tube equipped with a J. Young® O-ring tap containing a magnetic stirring bar was dried with a heatgun under reduced pressure and filled with nitrogen after cooling to room temperature. To this vessel was added aminocyclopropane (0.35 mmol), [Rh(cod)Cl]<sub>2</sub> (4.3 mg, 8.8 μmol, 2.5 mol%), and PCy<sub>3</sub>·HBF<sub>4</sub> (12.9 mg, 0.035 mmol, 10 mol%), after which it was introduced inside an argon atmosphere glovebox. In the glovebox, 1,1,1,3,5,5,5-heptamethyltrisiloxane (2a: 191 μL, 0.70 mmol, 2.0 equiv) and THF (2.0 mL) were added to the vessel. After the vessel was sealed with the O-ring tap, the vessel was taken out of the glovebox. The mixture was heated at 110 °C for 6 h in an 8-well reaction block with stirring. After cooling the reaction mixture to room temperature, the mixture was concentrated *in vacuo*. The residue was purified by Isolera® to afford aminosilane 3. The linear/branch (3/4) ratio was determined by <sup>1</sup>H NMR analysis of the crude product.

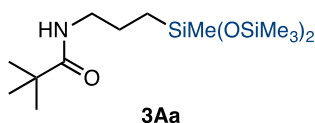

**N-(3-(1,1,1,3,5,5,5-Heptamethyltrisiloxan-3-yl)propyl)pivalamide (3Aa):** Purification by Isolera® (hexane/ethyl acetate = 1:0 to 5:1) afforded 3Aa as a colorless oil (71.1 mg, 56%, linear/branch = 99:1). <sup>1</sup>H NMR (600 MHz, CDCl<sub>3</sub>) δ 5.66 (brs, 1H), 3.22 (q, *J* = 6.6 Hz, 2H), 1.53–1.47 (m, 2H), 1.20 (s, 9H), 0.47–0.43 (m, 2H), 0.089 (s, 18H), 0.018 (s, 3H); <sup>13</sup>C NMR (151 MHz, CDCl<sub>3</sub>) δ 178.2, 42.1, 38.6, 27.6, 23.3, 14.7, 1.8, -0.37; HRMS (ESI) *m/z* calcd for C<sub>15</sub>H<sub>37</sub>NNaO<sub>3</sub>Si<sub>3</sub> [M+Na]<sup>+</sup>: 386.1973, found 386.1972.

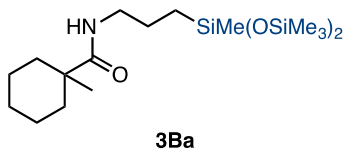

**N-(3-(1,1,1,3,5,5,5-Heptamethyltrisiloxan-3-yl)propyl)-1-methylcyclohexane-1-carboxamide (3Ba):** The reaction was stirred for 12 h. Purification by Isolera® (hexane/ethyl acetate = 1:0 to 5:1) afforded 3Ba as a brown oil (83.3 mg, 59%, linear/branch = 99:1). <sup>1</sup>H NMR (600 MHz, CDCl<sub>3</sub>) δ 5.66 (br, 1H), 3.24 (q, *J* = 6.6 Hz, 2H), 1.93–1.87 (m, 2H), 1.58–1.39 (m, 7H), 1.37–1.30 (m, 3H), 1.14 (s, 3H), 0.47–0.43 (m, 2H), 0.089 (s, 18H), 0.017 (s, 3H); <sup>13</sup>C NMR (151 MHz, CDCl<sub>3</sub>) δ 177.4, 42.6, 42.0, 35.7, 26.5, 25.8,

23.5, 22.9, 14.8, 1.8, -0.36; HRMS (DART)  $m/z$  calcd for  $C_{18}H_{42}NO_3Si_3$   $[M+H]^+$ : 404.2467, found 404.2468.

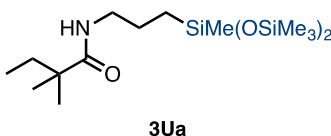

***N*-(3-(1,1,1,3,5,5,5-Heptamethyltrisiloxan-3-yl)propyl)-2,2-dimethylbutanamide (3Ua):** The reaction was stirred for 12 h. Purification by Isolera<sup>®</sup> (hexane/ethyl acetate = 1:0 to 5:1) afforded **3Ua** as a colorless oil (67.2 mg, 51%, linear/branch = 99:1). <sup>1</sup>H NMR (600 MHz, CDCl<sub>3</sub>)  $\delta$  5.62 (brs, 1H), 3.23 (q,  $J$  = 7.2 Hz, 2H), 1.54 (q,  $J$  = 7.2 Hz, 2H), 1.52–1.46 (m, 2H), 1.15 (s, 6H), 0.84 (t,  $J$  = 7.2 Hz, 3H), 0.47–0.42 (m, 2H), 0.088 (s, 18H), 0.016 (s, 3H); <sup>13</sup>C NMR (151 MHz, CDCl<sub>3</sub>)  $\delta$  177.4, 42.3, 42.1, 33.9, 25.0, 23.5, 14.8, 9.2, 1.8, -0.37; HRMS (DART)  $m/z$  calcd for  $C_{16}H_{40}NO_3Si_3$   $[M+H]^+$ : 378.2311, found 378.2310.

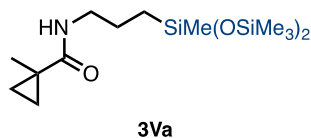

***N*-(3-(1,1,1,3,5,5,5-Heptamethyltrisiloxan-3-yl)propyl)-1-methylcyclopropane-1-carboxamide (3Va):** Purification by Isolera<sup>®</sup> (hexane/ethyl acetate = 1:0 to 5:1) afforded **3Va** as a brown oil (49.2 mg, 39%, linear/branch = 99:1). <sup>1</sup>H NMR (600 MHz, CDCl<sub>3</sub>)  $\delta$  5.77 (brs, 1H), 3.24 (q,  $J$  = 6.6 Hz, 2H), 1.56–1.49 (m, 2H), 1.32 (s, 3H), 1.19 (dd,  $J$  = 6.0, 3.6 Hz, 2H), 0.55 (dd,  $J$  = 6.0, 3.6 Hz, 2H), 0.48–0.44 (m, 2H), 0.094 (s, 18H), 0.023 (s, 3H); <sup>13</sup>C NMR (151 MHz, CDCl<sub>3</sub>)  $\delta$  174.7, 42.5, 23.4, 19.7, 18.9, 15.8, 14.8, 1.8, -0.37; HRMS (DART)  $m/z$  calcd for  $C_{15}H_{36}NO_3Si_3$   $[M+H]^+$ : 362.1997, found 362.1996.

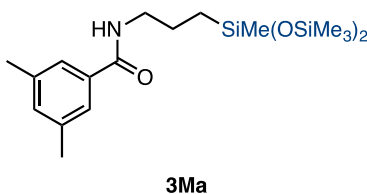

***N*-(3-(1,1,1,3,5,5,5-Heptamethyltrisiloxan-3-yl)propyl)-3,5-dimethylbenzamide (3Ma):** The reaction was stirred for 25 h. Purification by Isolera<sup>®</sup> (hexane/ethyl acetate = 1:0 to 5:1) afforded **3Ma** as a brown oil (59.0 mg, 41%, linear/branch = 99:1). <sup>1</sup>H NMR (600 MHz, CDCl<sub>3</sub>)  $\delta$  7.36 (s, 2H), 7.11 (s, 1H), 6.17 (brs, 1H), 3.42 (q,  $J$  = 6.6 Hz, 2H), 2.35 (s, 6H), 1.66–1.59 (m, 2H), 0.56–0.51 (m, 2H), 0.096 (s, 18H), 0.034 (s, 3H); <sup>13</sup>C NMR (151 MHz, CDCl<sub>3</sub>)  $\delta$  167.8, 138.2, 135.0, 132.8, 124.6, 42.6, 23.4, 21.2, 14.9, 1.8, -0.33; HRMS (DART)  $m/z$  calcd for  $C_{19}H_{38}NO_3Si_3$   $[M+H]^+$ : 412.2154, found 412.2153.

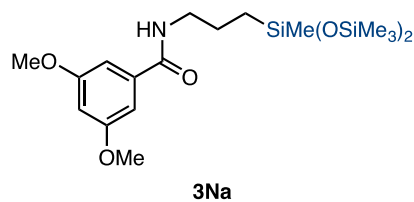

***N*-(3-(1,1,1,3,5,5,5-Heptamethyltrisiloxan-3-yl)propyl)-3,5-dimethoxybenzamide (3Na):** The reaction was stirred for 25 h. Purification by Isolera<sup>®</sup> (hexane/ethyl acetate = 1:0 to 5:1) afforded **3Na** as a colorless oil (63.5 mg, 41%, linear/branch = 99:1). <sup>1</sup>H NMR (600 MHz, CDCl<sub>3</sub>) δ 6.89 (d, *J* = 2.4 Hz, 2H), 6.57 (d, *J* = 2.4 Hz, 1H), 6.15 (brs, 1H), 3.82 (s, 6H), 3.42 (q, *J* = 7.2 Hz, 2H), 1.66–1.59 (m, 2H), 0.54–0.50 (m, 2H), 0.095 (s, 18H), 0.040 (s, 3H); <sup>13</sup>C NMR (151 MHz, CDCl<sub>3</sub>) δ 167.2, 160.8, 137.2, 104.8, 103.3, 55.5, 42.7, 23.4, 14.9, 1.8, -0.32; HRMS (DART) *m/z* calcd for C<sub>19</sub>H<sub>38</sub>NO<sub>5</sub>Si<sub>3</sub> [M+H]<sup>+</sup>: 444.2052, found 444.2054.

## 5. Synthetic Applications

### 5-1. Gram-scale Reaction

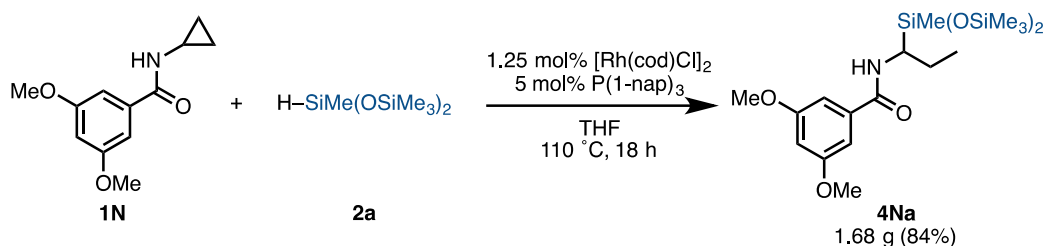

A 100 mL glass vessel tube equipped with a J. Young® O-ring tap containing a magnetic stirring bar was dried with a heatgun under reduced pressure and filled with nitrogen after cooling to room temperature. After adding *N*-cyclopropyl-3,5-dimethoxybenzamide (**1N**: 1.0 g, 4.5 mmol) and tri(naphthalen-1-yl)phosphine (P(1-nap)<sub>3</sub>: 93 mg, 0.23 mmol), the vessel was introduced inside an argon-atmosphere glovebox. In the glovebox, [Rh(cod)Cl]<sub>2</sub> (27.2 mg, 0.056 mmol) and THF (13 mL) were added. After 1,1,1,3,5,5,5-heptamethyltrisiloxane (**2a**: 2.5 mL, 9.0 mmol) and THF (10 mL) were added, the glass vessel was sealed with the O-ring tap and taken out of the glovebox. The mixture was stirred in an oil bath at 110 °C for 18 h, cooled to room temperature and concentrated *in vacuo*. The residue was purified by Isolera® (hexane/ethyl acetate = 9:1 to 5:1) to afford **4Na** (1.68 g, 84%, branch/linear = 88:12) as a white solid.

### 5-2. Tamao Oxidation

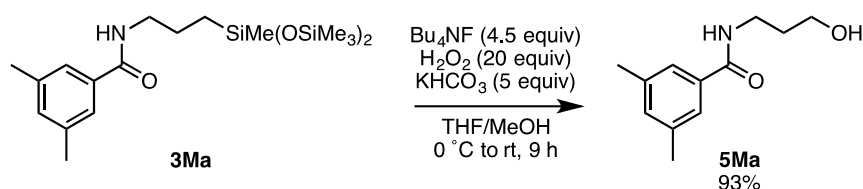

To a screw-cap 10 mL glass vessel containing a magnetic stirring bar was added **3Ma** (30.0 mg, 0.073 mmol). The contents were evacuated, then filled with nitrogen (repeat for a total of 3 times). After THF (1.4 mL) was added, the solution was cooled to 0 °C. To the solution was added tetrabutylammonium fluoride (Bu<sub>4</sub>NF: 1 M in THF, 0.32 mL, 0.32 mmol), which was then stirred at 0 °C for 10 min. MeOH (0.5 mL), KHCO<sub>3</sub> (36.5 mg, 0.37 mmol) and 30% aqueous H<sub>2</sub>O<sub>2</sub> (0.17 mL, 1.5 mmol) were added, and the mixture was stirred at room temperature for 9 h. The reaction was quenched by adding saturated aqueous Na<sub>2</sub>S<sub>2</sub>O<sub>3</sub>. The mixture was extracted with diethyl ether and the combined organic layers were washed with brine and concentrated *in vacuo*. The residue was purified by PTLC (hexane/ethyl acetate = 1:1) to afford **5Ma** (14.0 mg, 93%) as a colorless oil. *N*-(3-Hydroxypropyl)-3,5-dimethylbenzamide (**5Ma**)<sup>[6]</sup>: <sup>1</sup>H NMR (500 MHz, CDCl<sub>3</sub>) δ 7.37 (s, 2H), 7.13 (s, 1H), 6.63 (brs, 1H), 3.70 (q, *J* = 6.0 Hz, 2H),

<sup>[6]</sup> Tachibana, Y. ; Kawasaki, H. ; Kihara, N. ; Takata, T. *J. Org. Chem.* **2006**, *71*, 5093.

3.62 (q,  $J = 6.0$  Hz, 2H), 3.36 (t,  $J = 6.0$  Hz, 1H), 2.34 (s, 6H), 1.78 (quin,  $J = 6.0$  Hz, 2H);  $^{13}\text{C}$  NMR (126 MHz,  $\text{CDCl}_3$ )  $\delta$  169.0, 138.3, 134.1, 133.2, 124.7, 59.4, 36.8, 32.3, 21.2; HRMS (ESI)  $m/z$  calcd for  $\text{C}_{12}\text{H}_{17}\text{NNaO}_2$   $[\text{M}+\text{Na}]^+$ : 230.1151, found 230.1150.



## 6. Mechanistic Considerations

### 6-1. Isolation of reaction intermediates in the Rh-catalyzed hydrosilylation

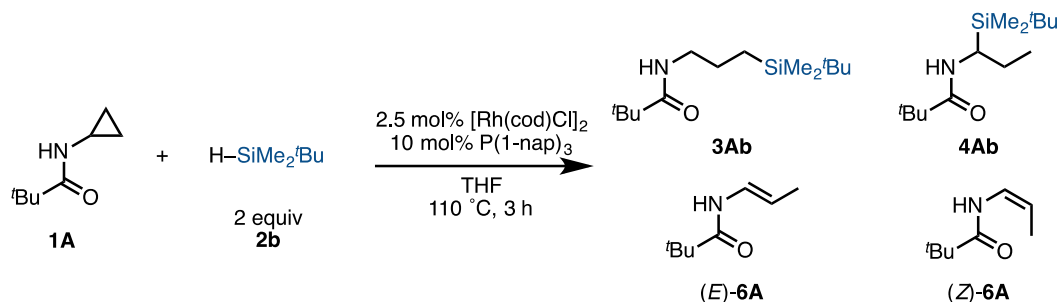

A 20 mL glass vessel tube equipped with a J. Young® O-ring tap containing a magnetic stirring bar was dried with a heatgun under reduced pressure and filled with nitrogen after cooling to room temperature. To this vessel was added *N*-cyclopropylpivalamide (49.4 mg, 0.35 mmol), [Rh(cod)Cl]<sub>2</sub> (4.3 mg, mmol, 8.8 μmol), and P(1-nap)<sub>3</sub> (14.4 mg, mmol, 35.0 μmol), after which it was introduced inside an argon atmosphere glovebox. In the glovebox, *tert*-butyldimethylsilane (0.11 mL, 0.70 mmol) and THF (2.0 mL) were added to the vessel. After the vessel was sealed with the O-ring tap, the vessel was taken out of the glovebox. The mixture was heated at 110 °C for 3 h in an 8-well reaction block with stirring. After cooling the reaction mixture to room temperature, the mixture was concentrated *in vacuo*. The NMR yield was determined by <sup>1</sup>H NMR analysis of the crude product using dibromomethane as an internal standard. NMR yields: **3Ab**: 8%, **4Ab**: 38%, **(E)-6A**: 35%, **(Z)-6A**: 21%

The residue was purified by Isolera® (hexane/ethyl acetate = 1:0 to 5:1) to afford **4Ab** (32.9 mg, 37%, a white solid), **(E)-6A** (16.4 mg, 33%, a white solid) and **(Z)-6A** (8.0 mg, 16%, a white solid).

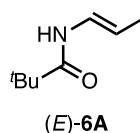

**(E)-N-(Prop-1-en-1-yl)pivalamide ((E)-6A)**<sup>[7]</sup>: <sup>1</sup>H NMR (600 MHz, CDCl<sub>3</sub>) δ 7.06 (brs, 1H), 6.79–6.73 (m, 1H), 5.19–5.12 (m, 1H), 1.68 (dd, *J* = 7.2, 1.2 Hz, 3H), 1.22 (s, 9H); <sup>13</sup>C NMR (151 MHz, CDCl<sub>3</sub>) δ 175.2, 123.6, 107.5, 38.6, 27.4, 14.8; HRMS (ESI) *m/z* calcd for C<sub>8</sub>H<sub>15</sub>NNaO [M+Na]<sup>+</sup>: 164.1046, found 164.1047.

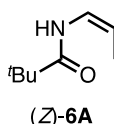

<sup>[7]</sup> Halli, J.; Kramer, P.; Bechthold, M.; Manolikakes, G. *Adv. Synth. Catal.* **2015**, 357, 3321.

**(Z)-N-(Prop-1-en-1-yl)pivalamide ((Z)-6A)**<sup>[7]</sup>: <sup>1</sup>H NMR (600 MHz, CDCl<sub>3</sub>) δ 7.13 (brs, 1H), 6.76–6.70 (m, 1H), 4.85–4.78 (m, 1H), 1.62 (d, *J* = 6.6 Hz, 3H), 1.25 (s, 9H); <sup>13</sup>C NMR (151 MHz, CDCl<sub>3</sub>) δ 175.3, 122.3, 104.9, 38.9, 27.5, 10.7; HRMS (ESI) *m/z* calcd for C<sub>8</sub>H<sub>15</sub>NNaO [M+Na]<sup>+</sup>: 164.1046, found 164.1048.

## 6-2. Hydrosilylation of reaction intermediates (*E*)-6A and (*Z*)-6A

### 6-2-1. Reaction of (*E*)-6A or (*Z*)-6A with [Rh(cod)Cl]<sub>2</sub>/P(1-nap)<sub>3</sub>

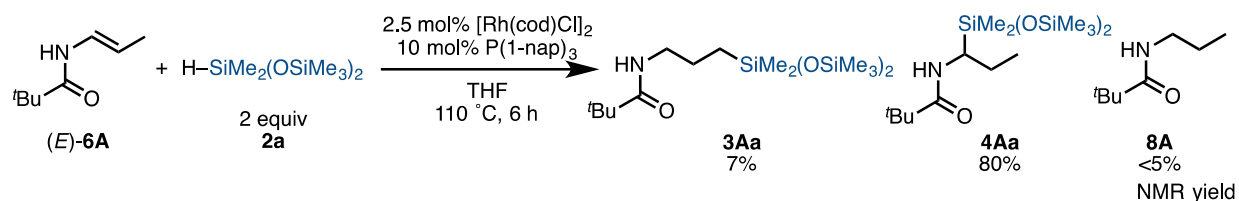

A 20 mL glass vessel tube equipped with a J. Young® O-ring tap containing a magnetic stirring bar was dried with a heatgun under reduced pressure and filled with nitrogen after cooling to room temperature. To this vessel was added (*E*)-N-(prop-1-en-1-yl)pivalamide ((*E*)-6A: 60.0 mg, 0.42 mmol), [Rh(cod)Cl]<sub>2</sub> (5.2 mg, 0.011 mmol), and P(1-nap)<sub>3</sub> (17.5 mg, 0.042 mmol), after which it was introduced inside an argon atmosphere glovebox. In the glovebox, 1,1,1,3,5,5,5-heptamethyltrisiloxane (2a: 0.23 mL, 0.85 mmol) and THF (2.4 mL) were added to the vessel. After the vessel was sealed with the O-ring tap, the reaction vessel was taken out of the glovebox. The mixture was heated at 110 °C for 6 h in an 8-well reaction block with stirring. After cooling the reaction mixture to room temperature, the mixture was concentrated *in vacuo*. The NMR yield was determined by <sup>1</sup>H NMR analysis of the crude product using dibromomethane as an internal standard.

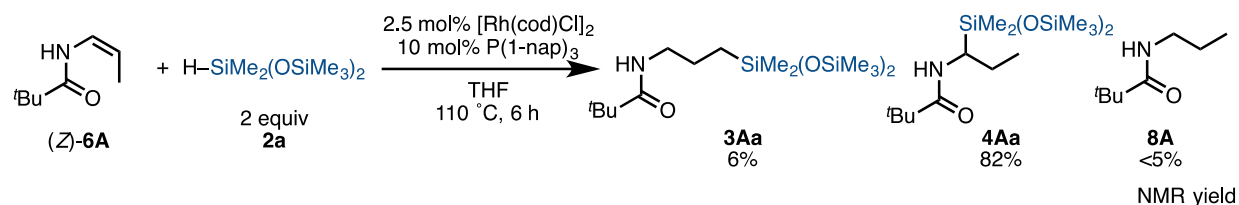

A 20 mL glass vessel tube equipped with a J. Young® O-ring tap containing a magnetic stirring bar was dried with a heatgun under reduced pressure and filled with nitrogen after cooling to room temperature. To this vessel was added (*Z*)-N-(prop-1-en-1-yl)pivalamide ((*Z*)-6A: 50.0 mg, 0.35 mmol), [Rh(cod)Cl]<sub>2</sub> (4.3 mg, 0.089 mmol), and P(1-nap)<sub>3</sub> (14.6 mg, 0.035 mmol), after which it was introduced inside an argon atmosphere glovebox. In the glovebox, 1,1,1,3,5,5,5-heptamethyltrisiloxane (2a: 0.19 mL, 0.71 mmol) and THF (2.0 mL) were added to the vessel. After the vessel was sealed with the O-ring tap, the reaction vessel was taken out of the glovebox. The mixture was heated at 110 °C for 6 h in an 8-well reaction block with stirring. After cooling the reaction mixture to room temperature, the mixture was

concentrated *in vacuo*. The NMR yield was determined by  $^1\text{H}$  NMR analysis of the crude product using dibromomethane as an internal standard.

These results indicated that the hydrosilylated product **4Aa** would be formed through Rh-catalyzed hydrosilylation of enamide **6A**.

### 6-2-2. Reaction of allylamine **7A** with $[\text{Rh}(\text{cod})\text{Cl}]_2/\text{P}(1\text{-nap})_3$

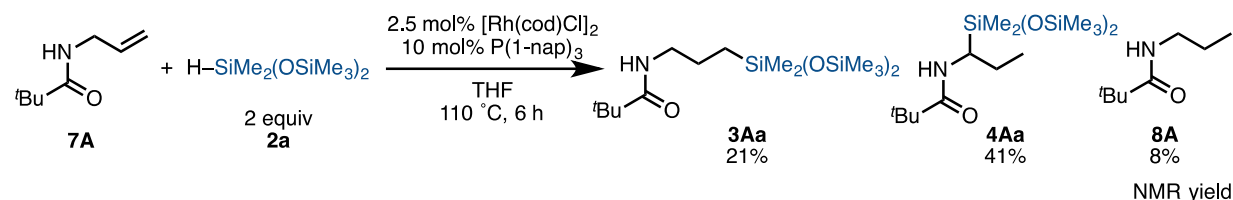

A 20 mL glass vessel tube equipped with a J. Young® O-ring tap containing a magnetic stirring bar was dried with a heatgun under reduced pressure and filled with nitrogen after cooling to room temperature. To this vessel was added *N*-allylpivalamide<sup>[8]</sup> (**7A**: 49.4 mg, 0.35 mmol),  $[\text{Rh}(\text{cod})\text{Cl}]_2$  (4.3 mg, 0.0088 mmol), and  $\text{P}(1\text{-nap})_3$  (14.4 mg, 0.035 mmol), after which it was introduced inside an argon atmosphere glovebox. In the glovebox, 1,1,1,3,5,5,5-heptamethyltrisiloxane (**2a**: 0.19 mL, 0.70 mmol) and THF (2.0 mL) were added to the vessel. After the vessel was sealed with the O-ring tap, the reaction vessel was taken out of the glovebox. The mixture was heated at 110 °C for 6 h in an 8-well reaction block with stirring. After cooling the reaction mixture to room temperature, the mixture was concentrated *in vacuo*. The NMR yield was determined by  $^1\text{H}$  NMR analysis of the crude product using dibromomethane as an internal standard.

The result suggested that the isomerization of allylamine to enamide took place *in situ* in the presence of  $\text{P}(1\text{-nap})_3$ .

### 6-2-3. Reaction of (*E*)-**6A** or (*Z*)-**6A** with $[\text{Rh}(\text{cod})\text{Cl}]_2/\text{PCy}_3\cdot\text{HBF}_4$

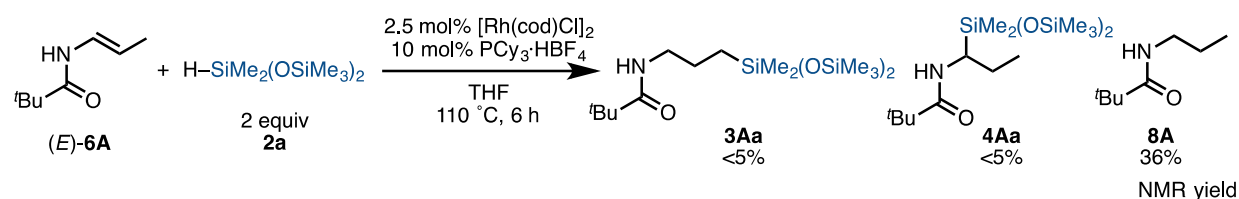

A 20 mL glass vessel tube equipped with a J. Young® O-ring tap containing a magnetic stirring bar was dried with a heatgun under reduced pressure and filled with nitrogen after cooling to room temperature. To this vessel was added (*E*)-*N*-(prop-1-en-1-yl)pivalamide (**(E)-6A**: 70.0 mg, 0.50 mmol),  $[\text{Rh}(\text{cod})\text{Cl}]_2$  (6.1 mg, 0.012 mmol), and  $\text{PCy}_3\cdot\text{HBF}_4$  (18.3 mg, 0.050 mmol), after which it was introduced inside an argon atmosphere glovebox. In the glovebox, 1,1,1,3,5,5,5-heptamethyltrisiloxane (**2a**: 0.27 mL, 0.99

<sup>[8]</sup> Moon, N. G. ; Harned, A. M. *Tetrahedron Lett.* **2013**, 54, 2960.

mmol) and THF (2.8 mL) were added to the vessel. After the vessel was sealed with the O-ring tap, the reaction vessel was taken out of the glovebox. The mixture was heated at 110 °C for 6 h in an 8-well reaction block with stirring. After cooling the reaction mixture to room temperature, the mixture was concentrated *in vacuo*. The NMR yield was determined by <sup>1</sup>H NMR analysis of the crude product using dibromomethane as an internal standard.

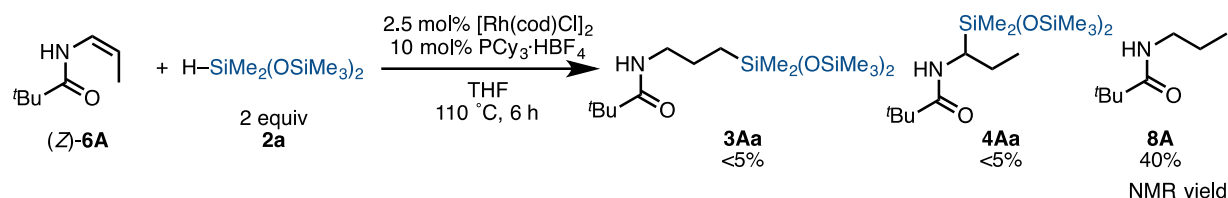

A 20 mL glass vessel tube equipped with a J. Young® O-ring tap containing a magnetic stirring bar was dried with a heatgun under reduced pressure and filled with nitrogen after cooling to room temperature. To this vessel was added (Z)-N-(prop-1-en-1-yl)pivalamide ((Z)-6A: 68.0 mg, 0.48 mmol), [Rh(cod)Cl]<sub>2</sub> (5.9 mg, 0.012 mmol), and PCy<sub>3</sub>·HBF<sub>4</sub> (17.7 mg, 0.048 mmol), after which it was introduced inside an argon atmosphere glovebox. In the glovebox, 1,1,1,3,5,5,5-heptamethyltrisiloxane (2a: 0.26 mL, 0.96 mmol) and THF (2.8 mL) were added to the vessel. After the vessel was sealed with the O-ring tap, the reaction vessel was taken out of the glovebox. The mixture was heated at 110 °C for 6 h in an 8-well reaction block with stirring. After cooling the reaction mixture to room temperature, the mixture was concentrated *in vacuo*. The NMR yield was determined by <sup>1</sup>H NMR analysis of the crude product using dibromomethane as an internal standard.

These results showed that hydrogenated product 8A was formed when PCy<sub>3</sub>·HBF<sub>4</sub> was used as the ligand in the reaction of enamide 6A and that hydrosilylation of enamide 6A was suppressed.

#### 6-2-4. Reaction of allylamine 7A with [Rh(cod)Cl]<sub>2</sub>/PCy<sub>3</sub>·HBF<sub>4</sub>

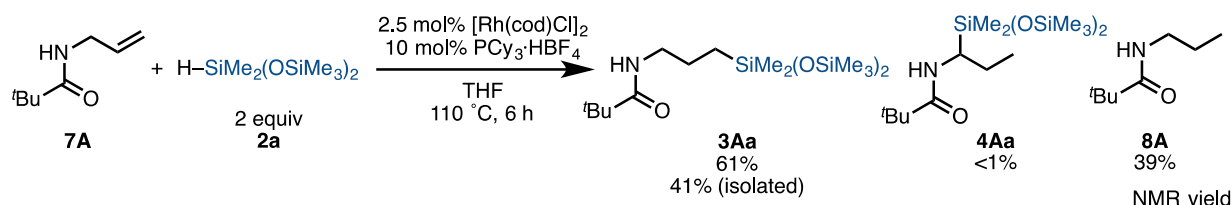

A 20 mL glass vessel tube equipped with a J. Young® O-ring tap containing a magnetic stirring bar was dried with a heatgun under reduced pressure and filled with nitrogen after cooling to room temperature. To this vessel was added N-allylpivalamide<sup>[8]</sup> (7A: 49.4 mg, 0.35 mmol), [Rh(cod)Cl]<sub>2</sub> (4.3 mg, 0.0088

<sup>[8]</sup> Moon, N. G. ; Harned, A. M. *Tetrahedron Lett.* **2013**, 54, 2960.

mmol), and  $\text{PCy}_3 \cdot \text{HBF}_4$  (12.9 mg, 0.035 mmol), after which it was introduced inside an argon atmosphere glovebox. In the glovebox, 1,1,1,3,5,5,5-heptamethyltrisiloxane (**2a**: 0.19 mL, 0.70 mmol) and THF (2.0 mL) were added to the vessel. After the vessel was sealed with the O-ring tap, the reaction vessel was taken out of the glovebox. The mixture was heated at 110 °C for 6 h in an 8-well reaction block with stirring. After cooling the reaction mixture to room temperature, the mixture was concentrated *in vacuo*. The NMR yield was determined by  $^1\text{H}$  NMR analysis of the crude product using dibromomethane as an internal standard. The residue was purified by Isolera<sup>®</sup> (hexane/ethyl acetate = 1:0 to 5:1) to afford **3Aa** (52.7 mg, 41%) as a colorless oil.

This result indicated that the formation of linear product **3** arises from the hydrosilylation of allylamine.

### 6-3. Isomerization of allylamine to enamide under $[\text{Rh}(\text{cod})\text{Cl}]_2/\text{P}(\text{1-nap})_3$ catalytic condition

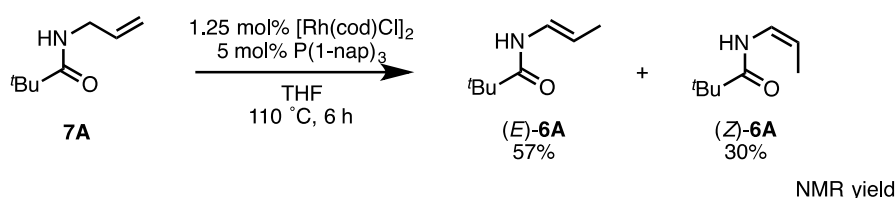

A 20 mL glass vessel tube equipped with a J. Young<sup>®</sup> O-ring tap containing a magnetic stirring bar was dried with a heatgun under reduced pressure and filled with nitrogen after cooling to room temperature. To this vessel was added  $[\text{Rh}(\text{cod})\text{Cl}]_2$  (2.2 mg, 0.0044 mmol),  $\text{P}(\text{1-nap})_3$  (7.2 mg, 0.018 mmol) and THF (2.0 mL), then *N*-allylpivalamide<sup>[8]</sup> (**7A**: 49.4 mg, 0.35 mmol) was added under nitrogen. After the vessel was sealed with the O-ring tap, the mixture was heated at 110 °C for 6 h in an 8-well reaction block with stirring. After cooling the reaction mixture to room temperature, the mixture was concentrated *in vacuo*. The NMR yield was determined by  $^1\text{H}$  NMR analysis of the crude product using dibromomethane as an internal standard.

This result showed that allylamine is isomerized to enamide in the presence of  $[\text{Rh}(\text{cod})\text{Cl}]_2$  and  $\text{P}(\text{1-nap})_3$ . The ligand effect of  $\text{P}(\text{1-nap})_3$  is supposed to control isomerization of allylamine to enamide.

<sup>[8]</sup> Moon, N. G. ; Harned, A. M. *Tetrahedron Lett.* **2013**, 54, 2960.

## 7. Proposed Reaction Mechanism

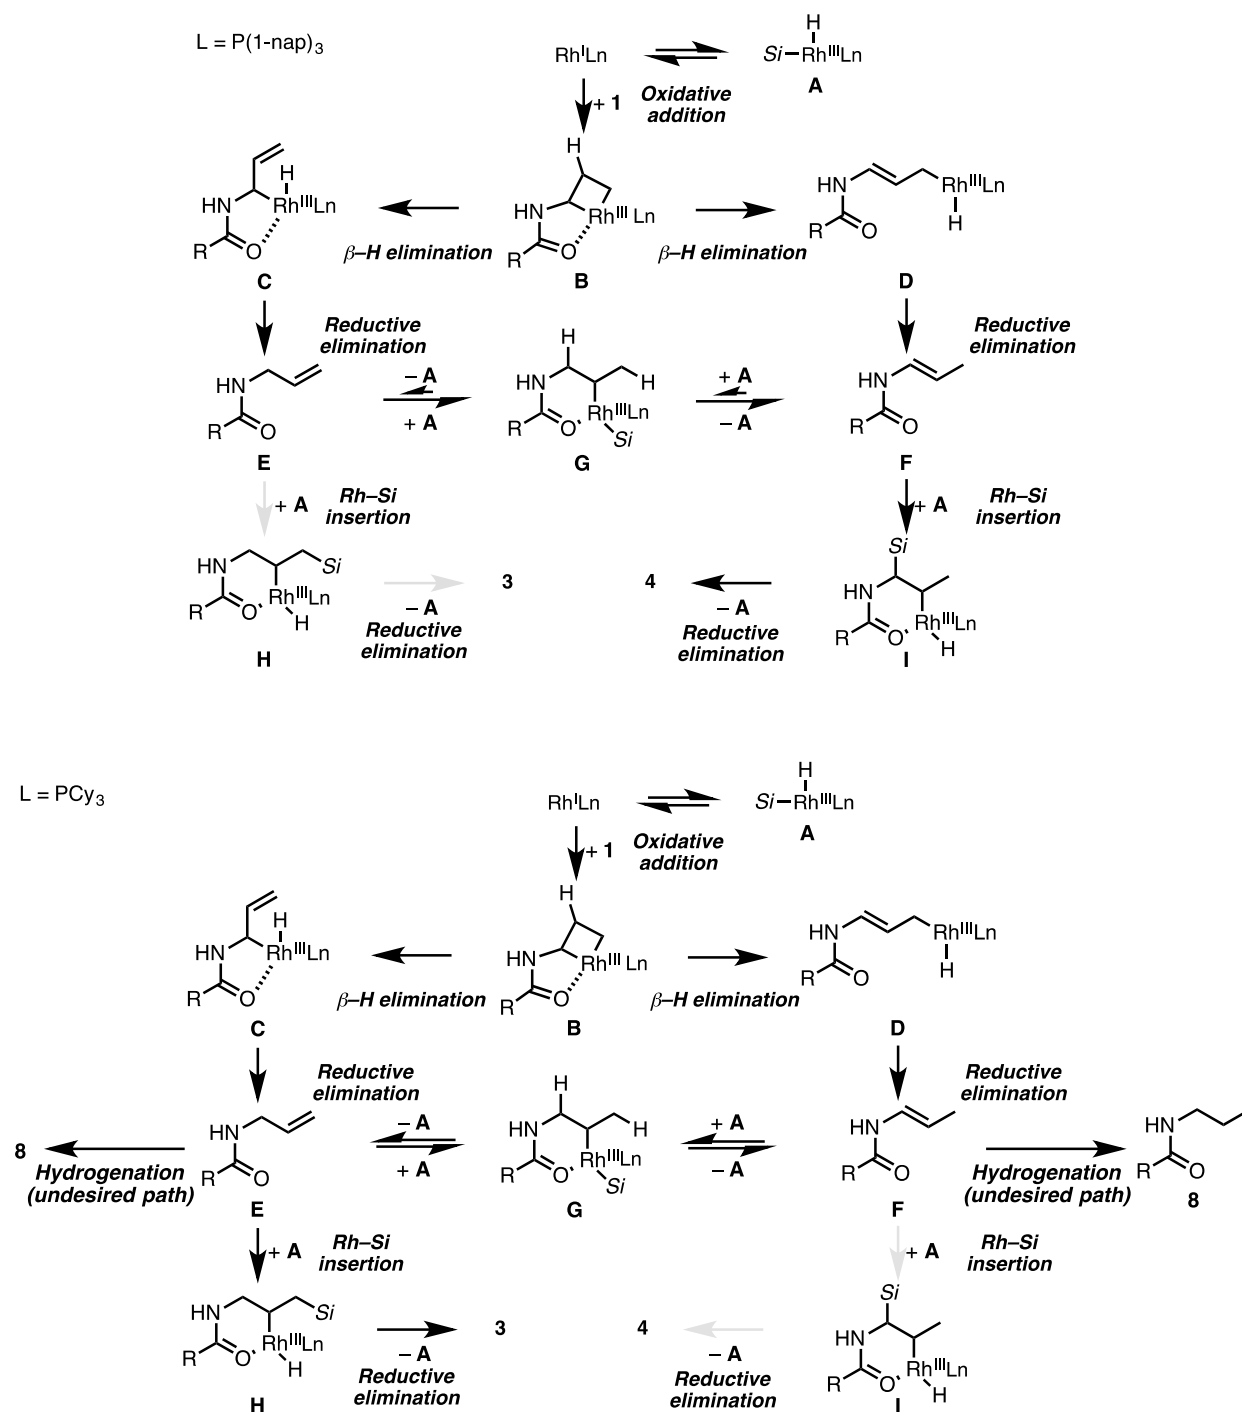

## 8. Effect of Reaction Parameters

[Rh(cod)Cl]<sub>2</sub>/P(1-nap)<sub>3</sub> catalytic system

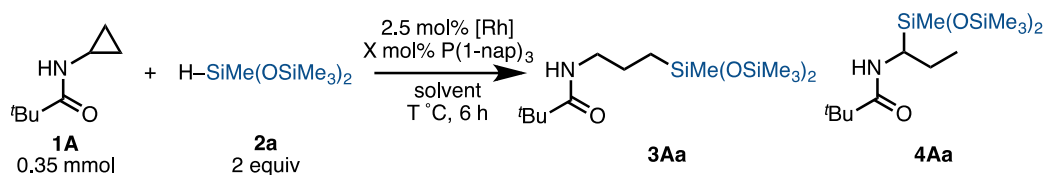

| Entry | [Rh]              | X mol%  | Solvent     | T °C   | NMR yield ( <b>3Aa</b> ) | NMR yield ( <b>4Aa</b> ) |
|-------|-------------------|---------|-------------|--------|--------------------------|--------------------------|
| 1     | $[Rh(cod)Cl]_2$   | 5 mol%  | THF         | 120 °C | 20%                      | 75%                      |
| 2     | $[Rh(cod)Cl]_2$   | 10 mol% | THF         | 120 °C | 9% (4%) <sup>a</sup>     | 82% (81%) <sup>a</sup>   |
| 3     | $[Rh(cod)Cl]_2$   | 15 mol% | THF         | 120 °C | 9%                       | 81%                      |
| 4     | $[Rh(cod)Cl]_2$   | 20 mol% | THF         | 120 °C | 8%                       | 76%                      |
| 5     | $[Rh(cod)Cl]_2$   | 10 mol% | THF         | 110 °C | 10%                      | 80%                      |
| 6     | $[Rh(cod)Cl]_2$   | 10 mol% | THF         | 100 °C | 10%                      | 65%                      |
| 7     | $[Rh(cod)OMe]_2$  | 10 mol% | THF         | 110 °C | 9%                       | 91% (88%) <sup>a</sup>   |
| 8     | $[Rh(PPh_3)_3Cl]$ | 5 mol%  | THF         | 120 °C | 3%                       | 10%                      |
| 9     | $[Rh(cod)Cl]_2$   | 10 mol% | cyclohexane | 120 °C | 14%                      | 80%                      |
| 10    | $[Rh(cod)Cl]_2$   | 10 mol% | toluene     | 120 °C | 14%                      | 75%                      |

NMR yield was determined by <sup>1</sup>H NMR analysis of crude products using dibromomethane as an internal standard.

<sup>a</sup>Isolated yield.

[Rh(cod)Cl]<sub>2</sub>/PCy<sub>3</sub> catalytic system

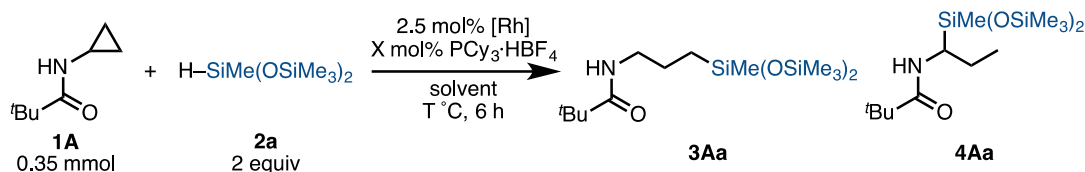

| Entry | [Rh]             | X mol%  | Solvent     | T °C   | NMR yield ( <b>3Aa</b> ) | NMR yield ( <b>4Aa</b> ) |
|-------|------------------|---------|-------------|--------|--------------------------|--------------------------|
| 1     | $[Rh(cod)Cl]_2$  | 5 mol%  | THF         | 120 °C | 54%                      | <1%                      |
| 2     | $[Rh(cod)Cl]_2$  | 10 mol% | THF         | 120 °C | 61% (56%) <sup>a</sup>   | <1%                      |
| 3     | $[Rh(cod)Cl]_2$  | 15 mol% | THF         | 120 °C | 50%                      | <1%                      |
| 4     | $[Rh(cod)Cl]_2$  | 20 mol% | THF         | 120 °C | 42%                      | <1%                      |
| 5     | $[Rh(cod)Cl]_2$  | 5 mol%  | THF         | 110 °C | 60%                      | <1%                      |
| 6     | $[Rh(cod)Cl]_2$  | 5 mol%  | THF         | 100 °C | 57%                      | <1%                      |
| 7     | $[Rh(cod)Cl]_2$  | 10 mol% | THF         | 110 °C | 60%                      | 3%                       |
| 8     | $[Rh(cod)OMe]_2$ | 10 mol% | THF         | 110 °C | 47%                      | 7%                       |
| 9     | $[Rh(cod)Cl]_2$  | 5 mol%  | cyclohexane | 110 °C | 58%                      | 7%                       |
| 10    | $[Rh(cod)Cl]_2$  | 5 mol%  | toluene     | 110 °C | 43%                      | 3%                       |

NMR yield was determined by <sup>1</sup>H NMR analysis of crude products using dibromomethane as an internal standard.

<sup>a</sup>Isolated yield.

In all reactions, the formation of *N*-propylpivalamide was observed.

## 9. Discovery of Rh-catalyzed Hydrosilylation

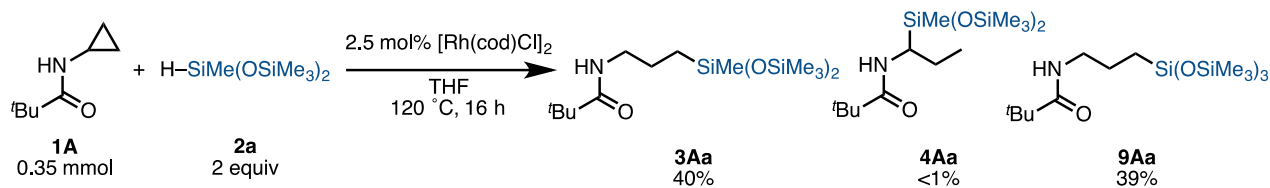

A 20 mL glass vessel tube equipped with a J. Young® O-ring tap containing a magnetic stirring bar was dried with a heatgun under reduced pressure and filled with nitrogen after cooling to room temperature. To this vessel was added *N*-cyclopropylpivalamide (**1A**: 49.5 mg, 0.35 mmol),  $[\text{Rh}(\text{cod})\text{Cl}]_2$  (4.3 mg, 8.8  $\mu\text{mol}$ ), after which it was introduced inside an argon atmosphere glovebox. In the glovebox, 1,1,1,3,5,5,5-heptamethyltrisiloxane (**2a**: 191  $\mu\text{L}$ , 0.70 mmol) and THF (2.0 mL) were added to the vessel. After the vessel was sealed with the O-ring tap, the vessel was taken out of the glovebox. The mixture was heated at 120 °C for 16 h in an 8-well reaction block with stirring. After cooling the reaction mixture to room temperature, the mixture was concentrated *in vacuo*. The residue was purified by Isolera® (hexane/ethyl acetate = 5:1 to 2:1) to afford aminosilane **3Aa** (50.1 mg, 40%, colorless oil) and **9Aa** (61.8 mg, 39%, white solid).

***N*-(3-(1,1,1,5,5,5-Hexamethyl-3-((trimethylsilyl)oxy)trisiloxan-3-yl)propyl)pivalamide (9Aa):**  $^1\text{H}$  NMR (600 MHz,  $\text{CD}_2\text{Cl}_2$ )  $\delta$  5.66 (brs, 1H), 3.17 (q,  $J$  = 6.6 Hz, 2H), 1.54–1.47 (m, 2H), 1.16 (s, 9H), 0.47–0.42 (m, 2H), 0.11 (s, 27H);  $^{13}\text{C}$  NMR (151 MHz,  $\text{CD}_2\text{Cl}_2$ )  $\delta$  178.2, 42.3, 38.8, 27.8, 24.0, 12.0, 1.8; HRMS (ESI)  $m/z$  calcd for  $\text{C}_{17}\text{H}_{43}\text{NNaO}_4\text{Si}_4$   $[\text{M}+\text{Na}]^+$ : 460.2161, found 460.2160.



# 10. $^1\text{H}$ and $^{13}\text{C}$ NMR Spectra

$^1\text{H}$  NMR (600MHz,  $\text{CDCl}_3$ ) of 1B

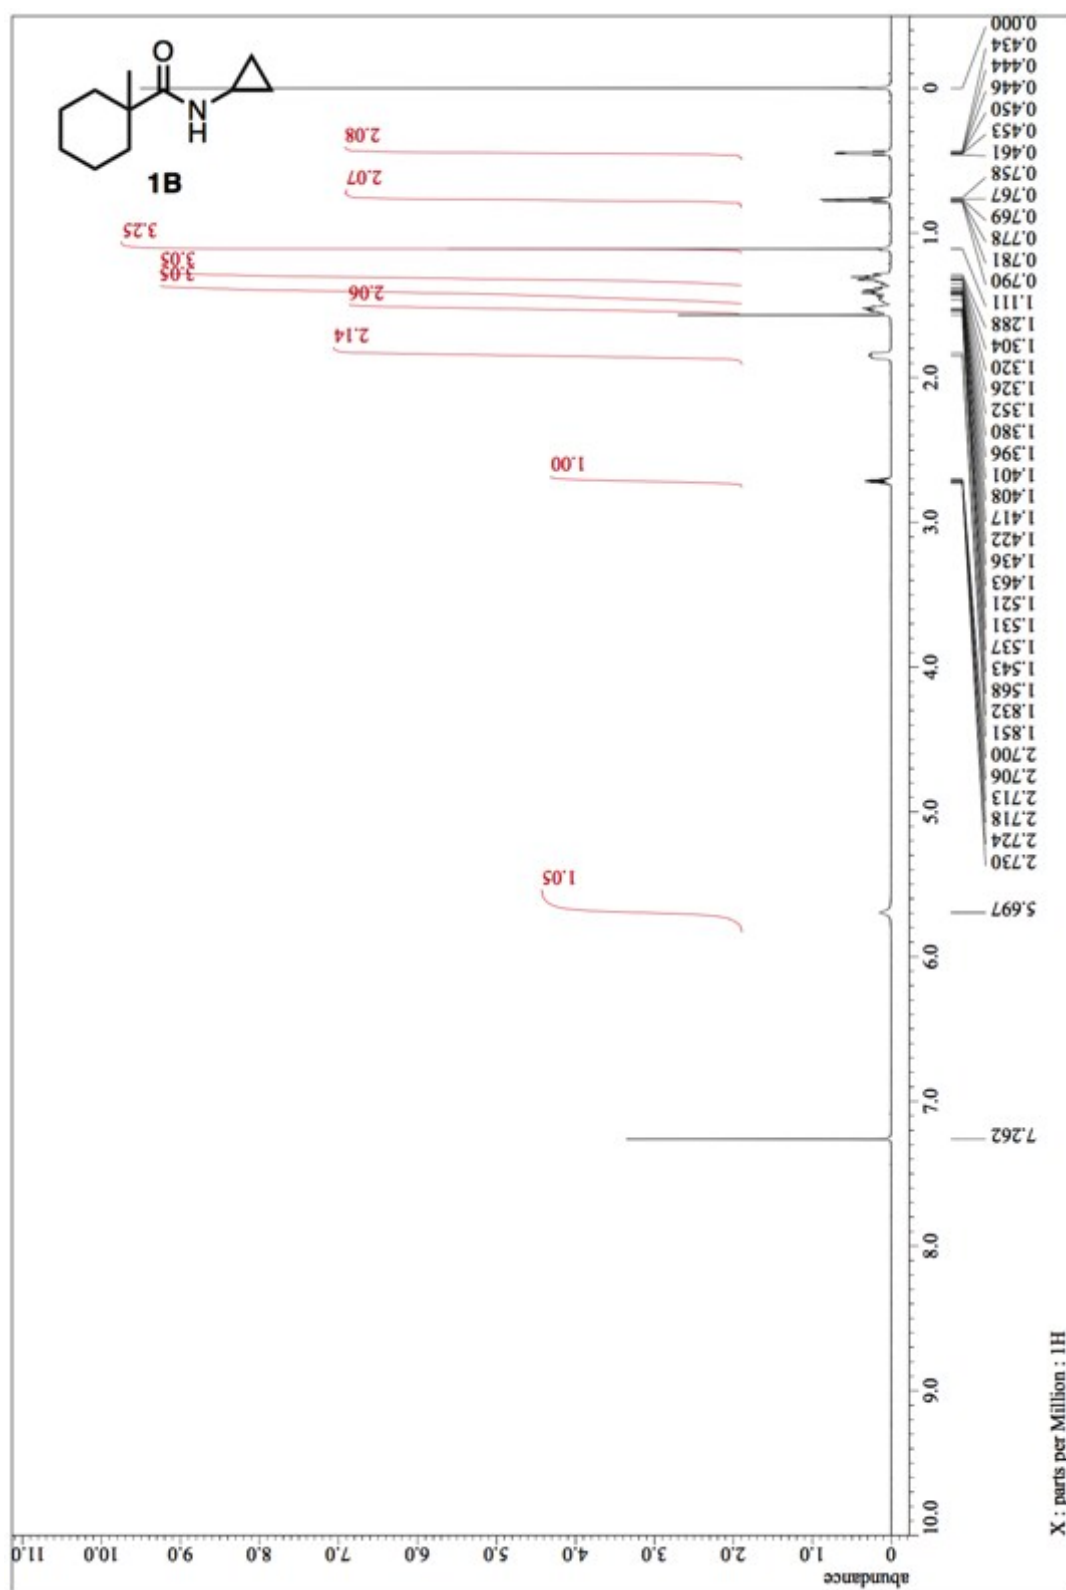

$^{13}\text{C}$  NMR (151MHz,  $\text{CDCl}_3$ ) of **1B**

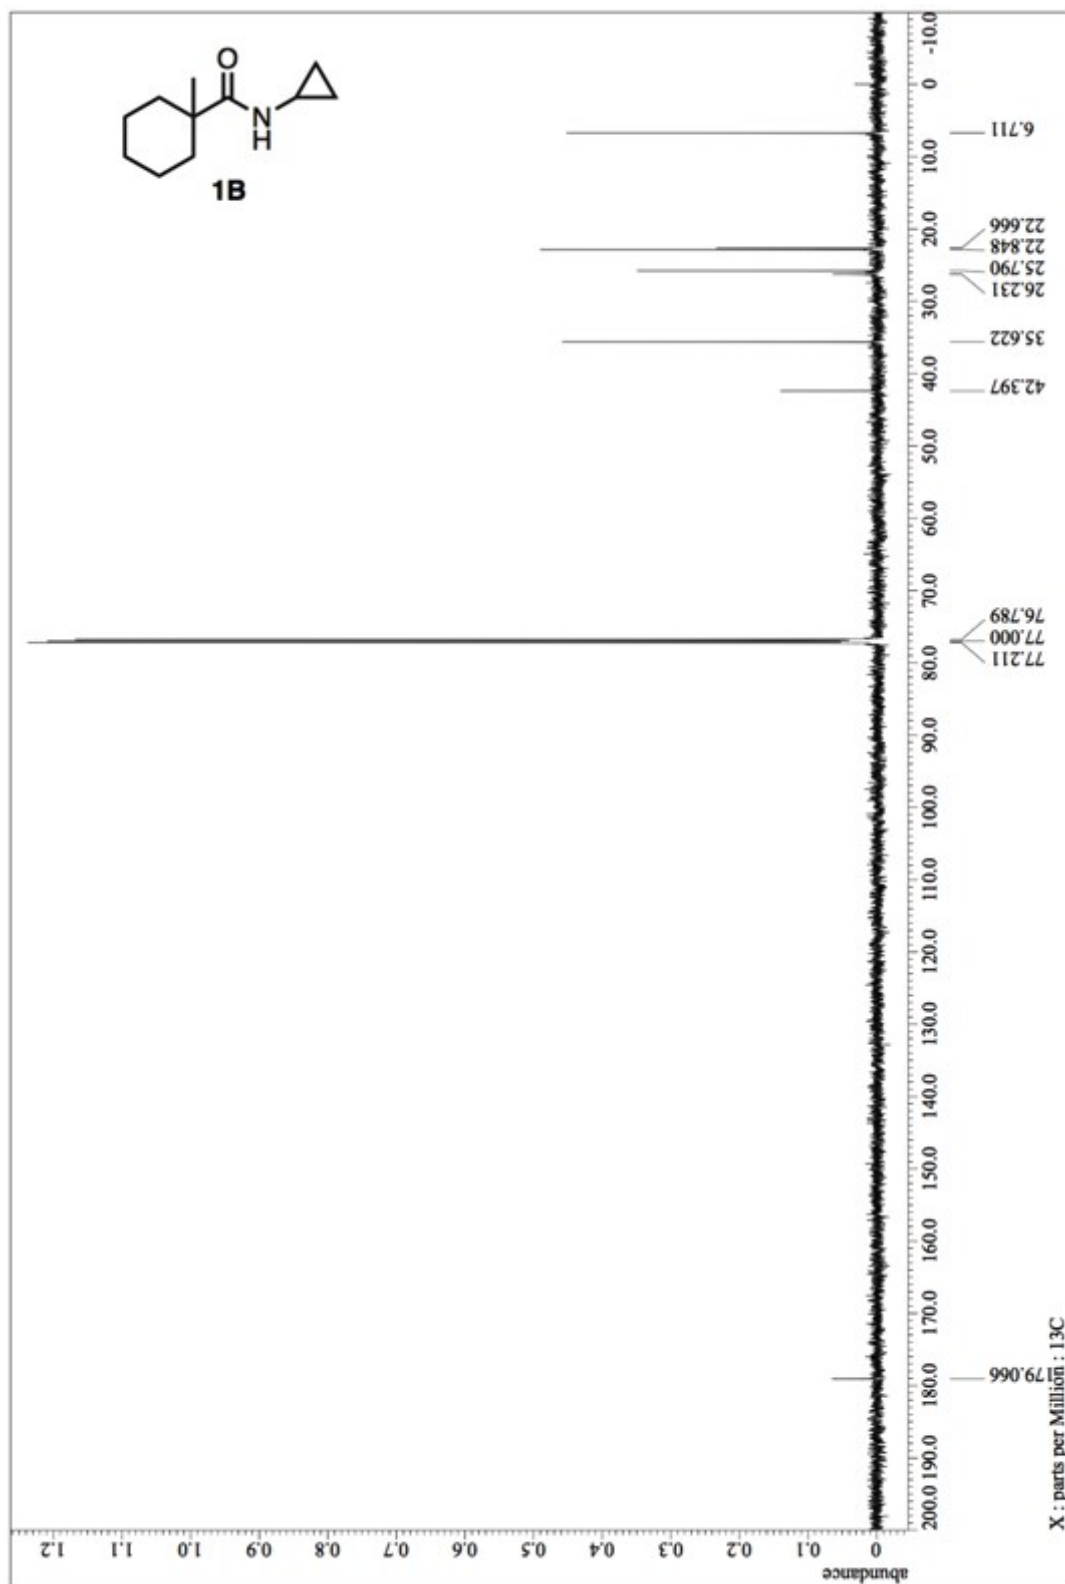

$^1\text{H}$  NMR (600MHz,  $\text{CDCl}_3$ ) of 1E

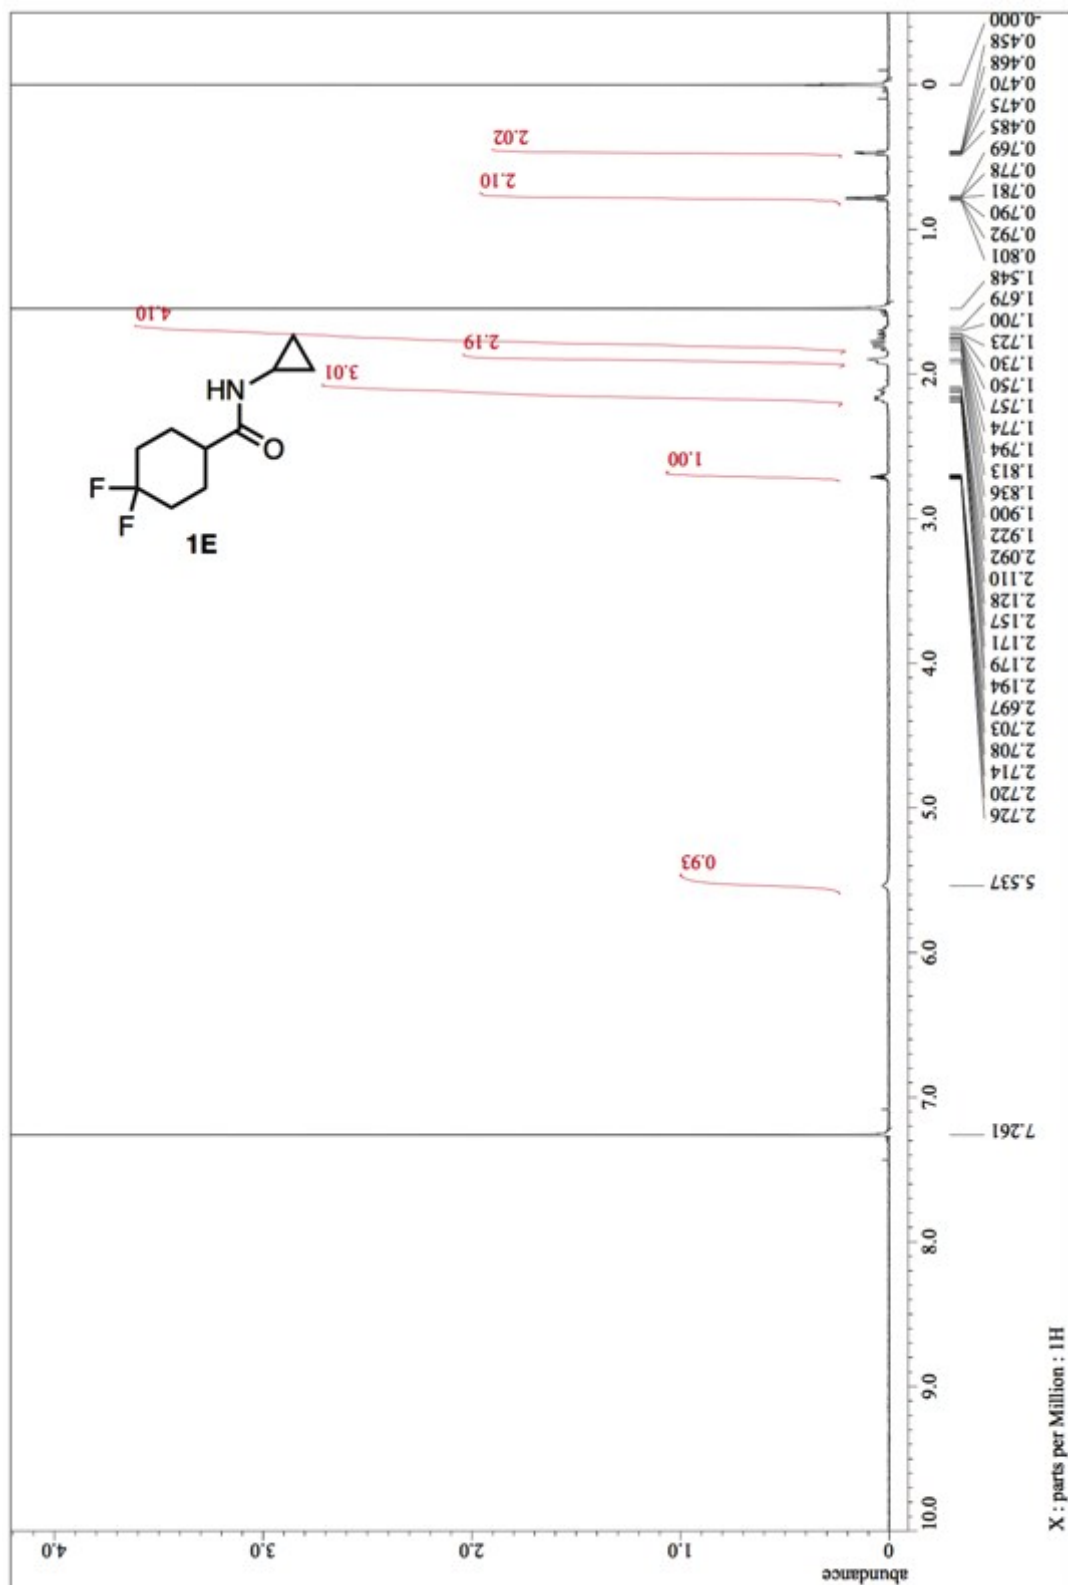

$^{13}\text{C}$  NMR (126MHz,  $\text{CDCl}_3$ ) of **1E**

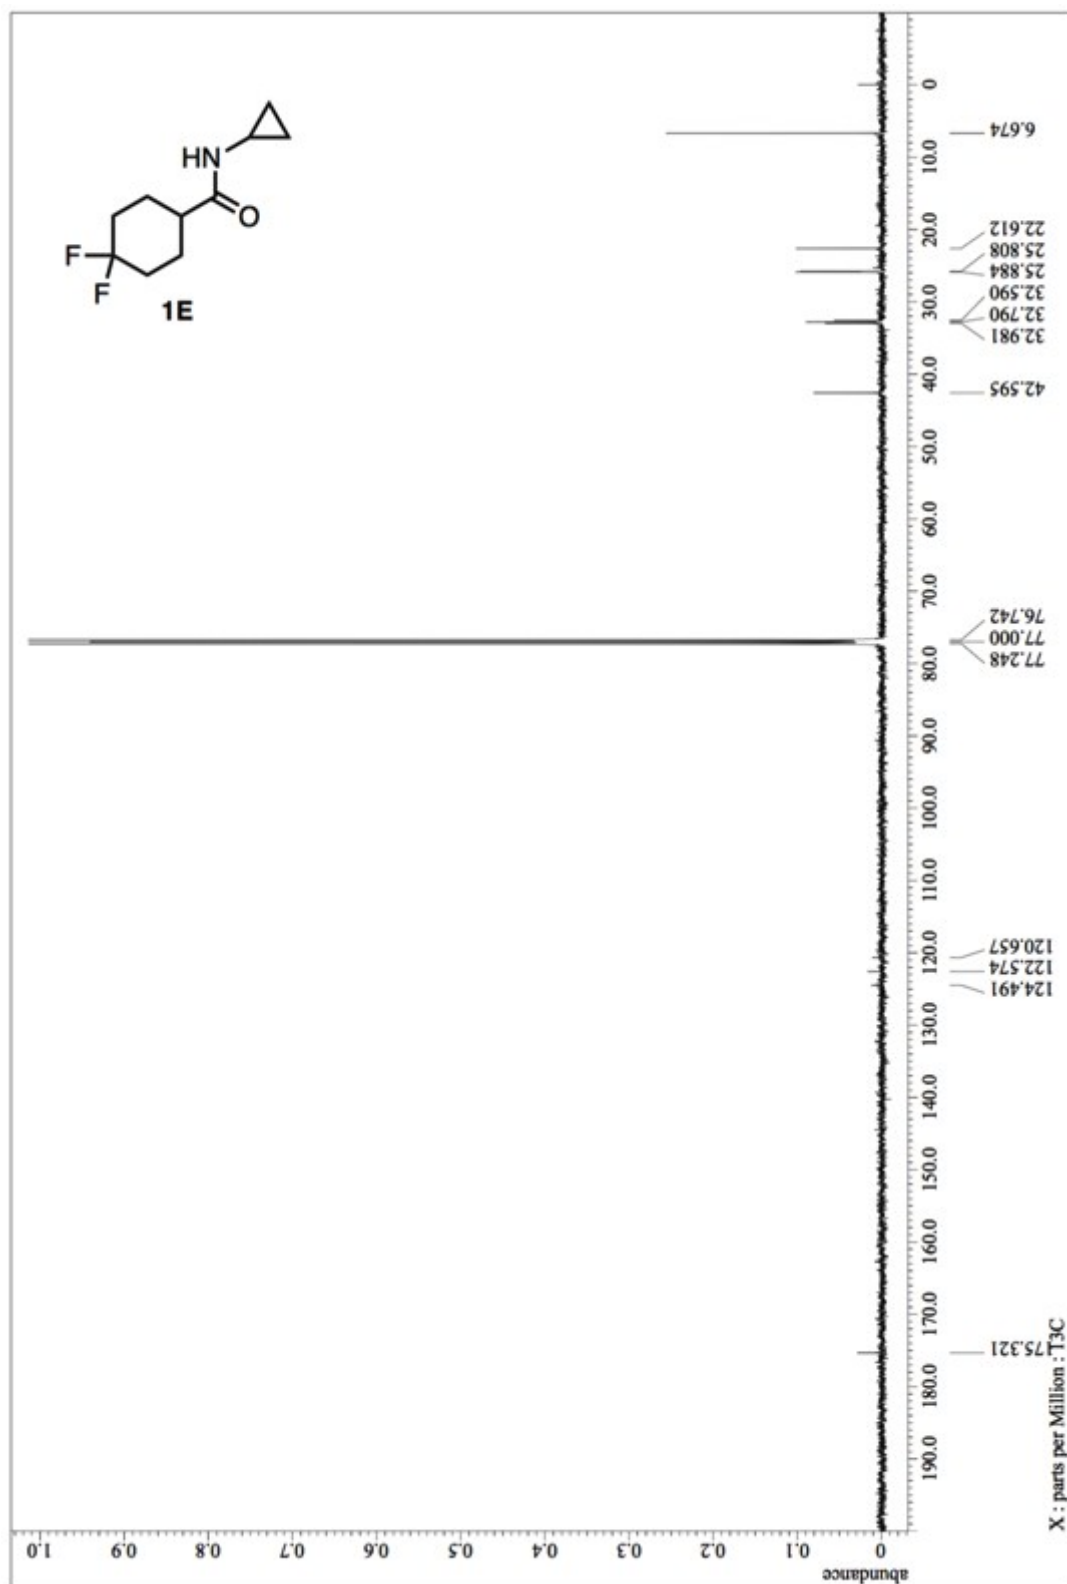

<sup>1</sup>H NMR (600MHz, CDCl<sub>3</sub>) of 1F

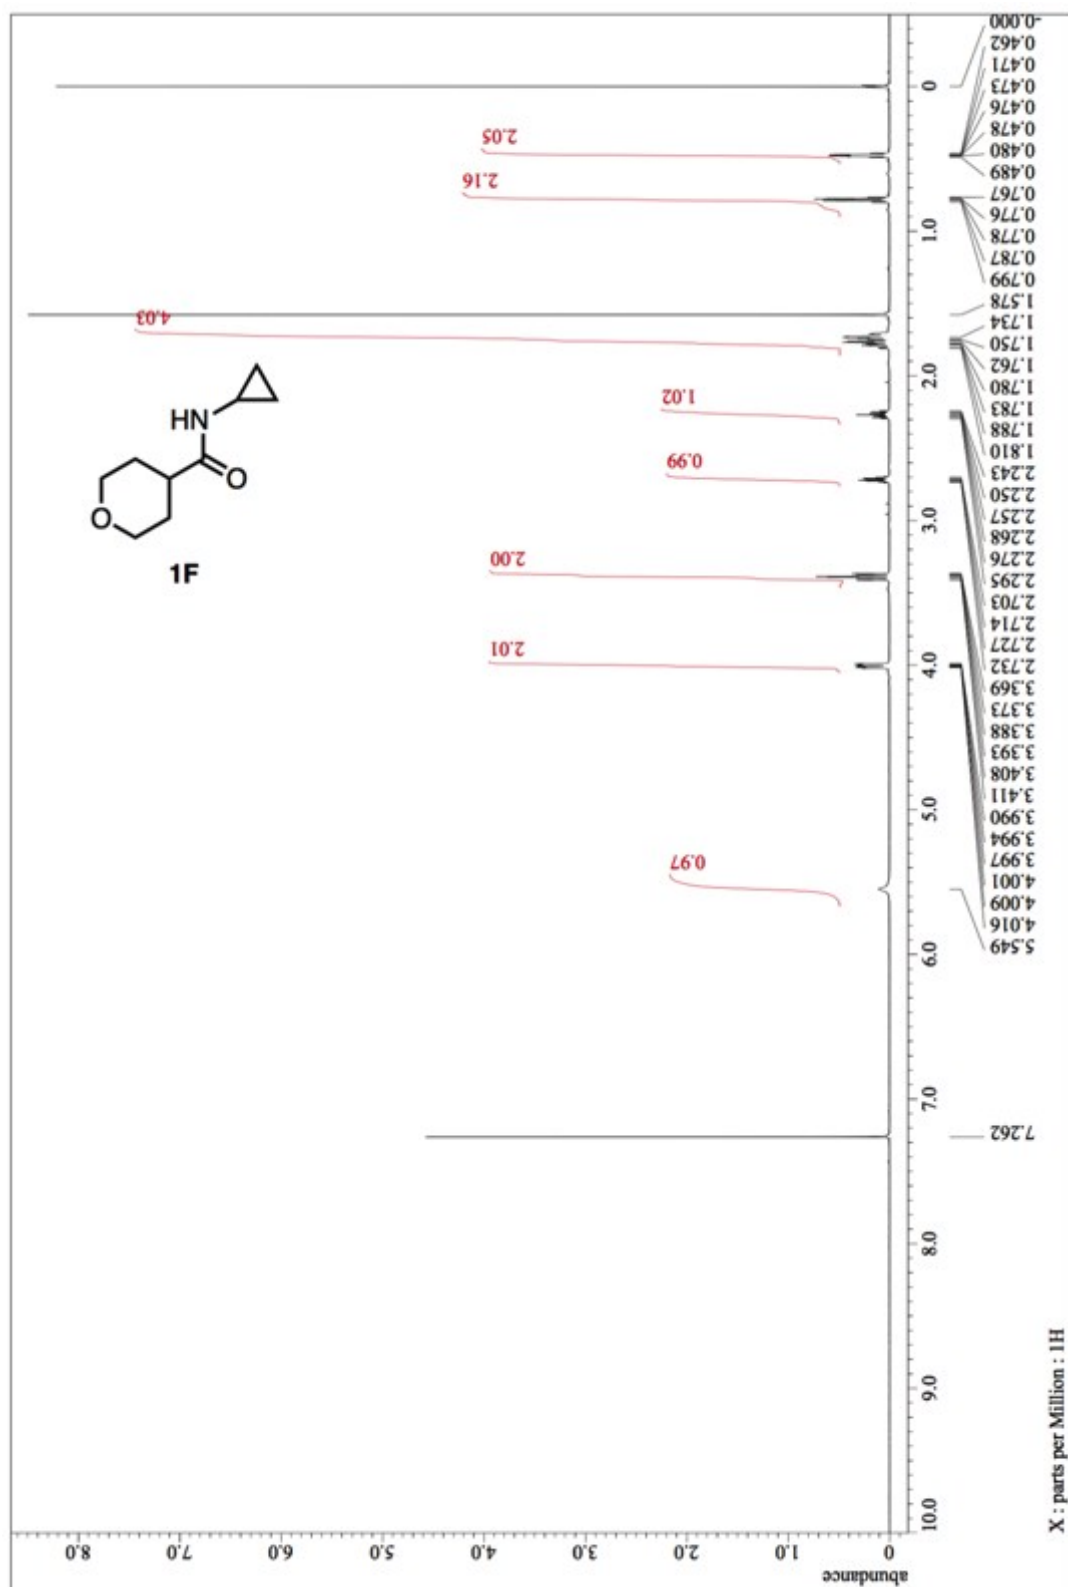

$^{13}\text{C}$  NMR (126MHz,  $\text{CDCl}_3$ ) of **1F**

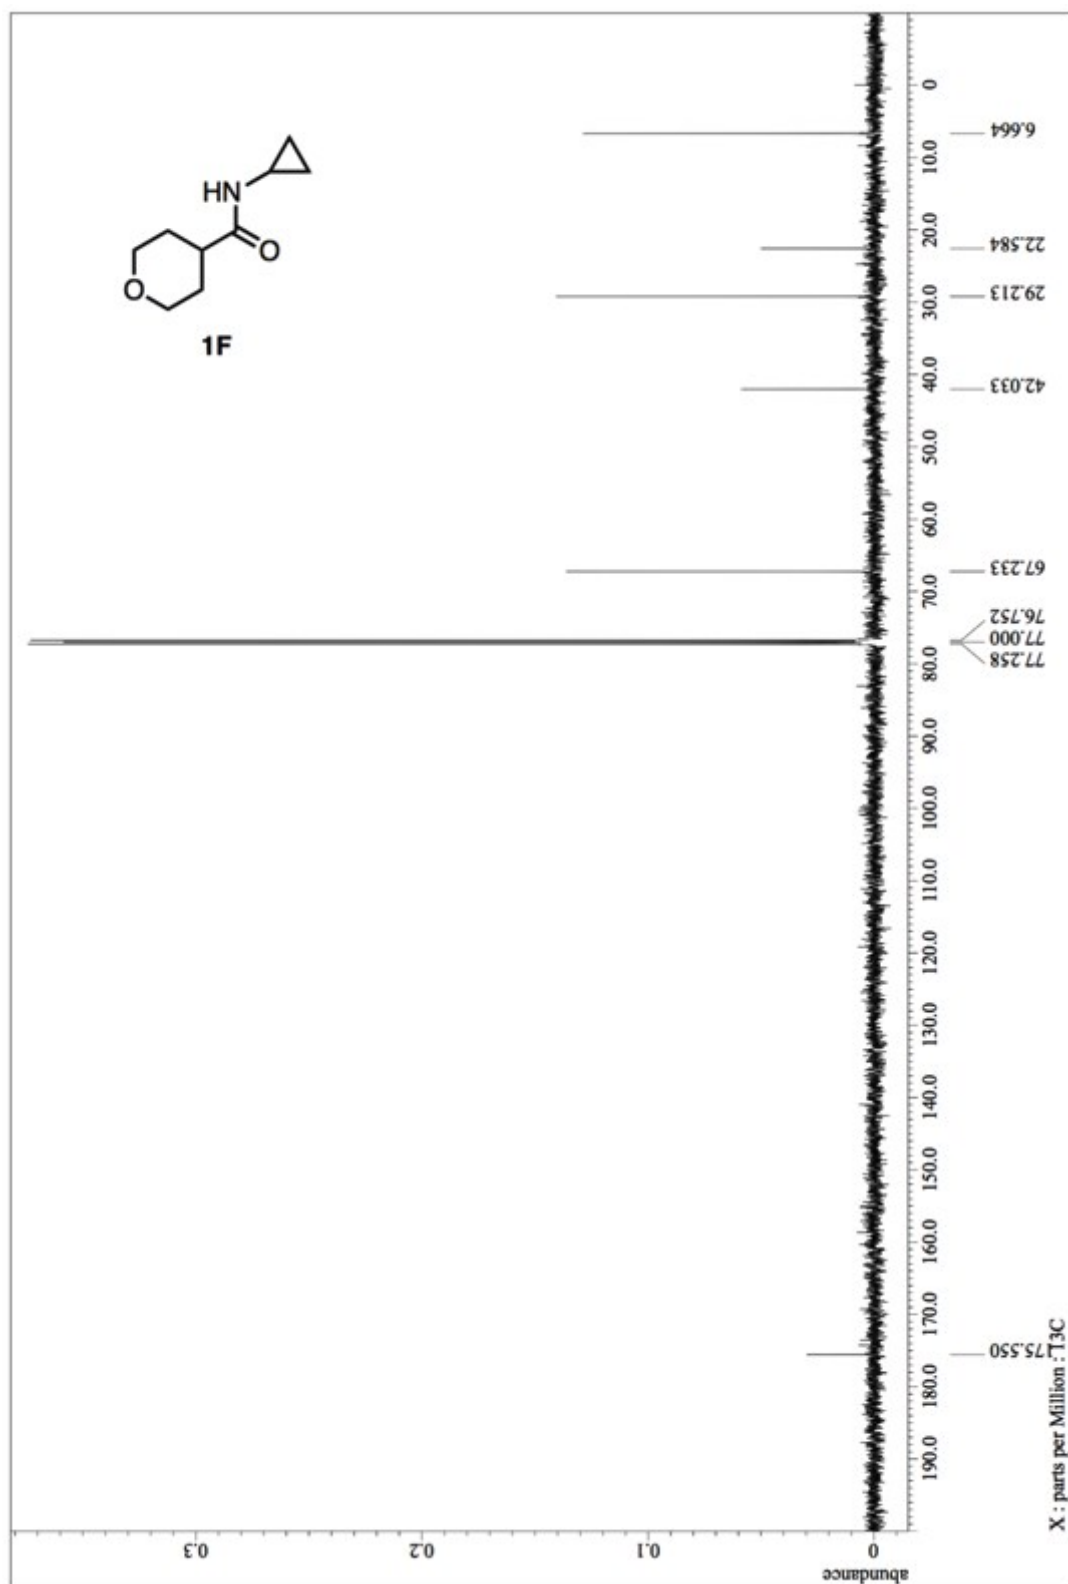

$^1\text{H}$  NMR (600MHz,  $\text{CDCl}_3$ ) of **1H**

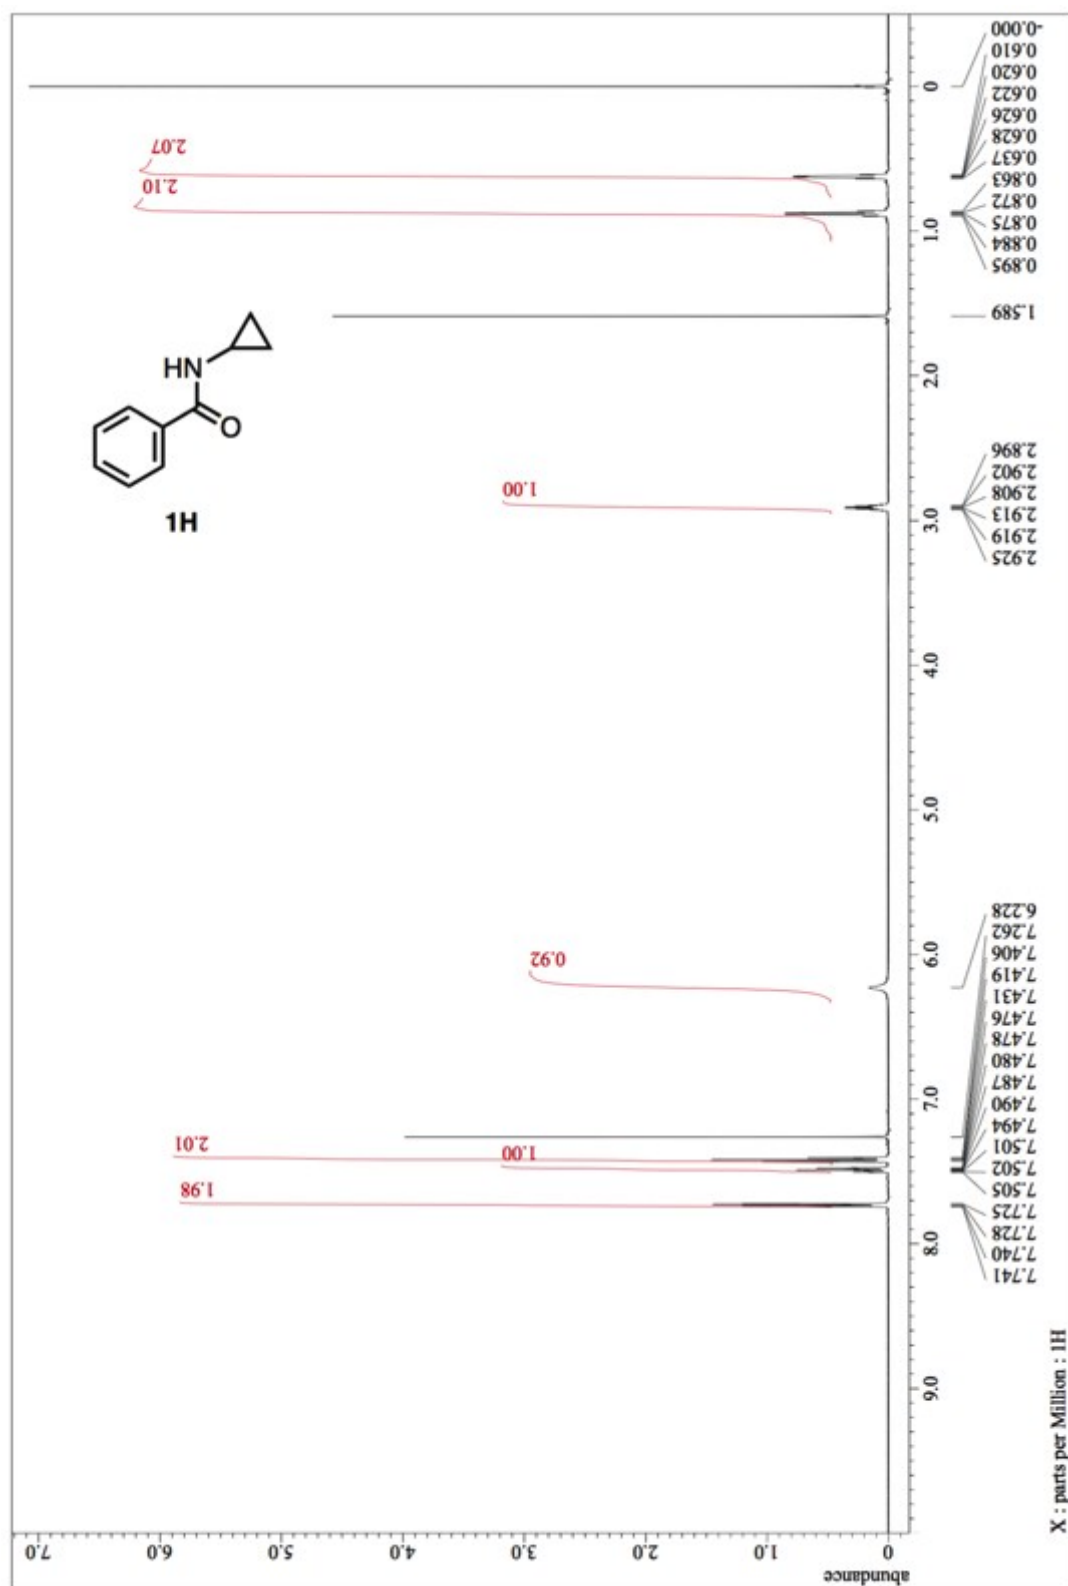

$^{13}\text{C}$  NMR (126MHz,  $\text{CDCl}_3$ ) of **1H**

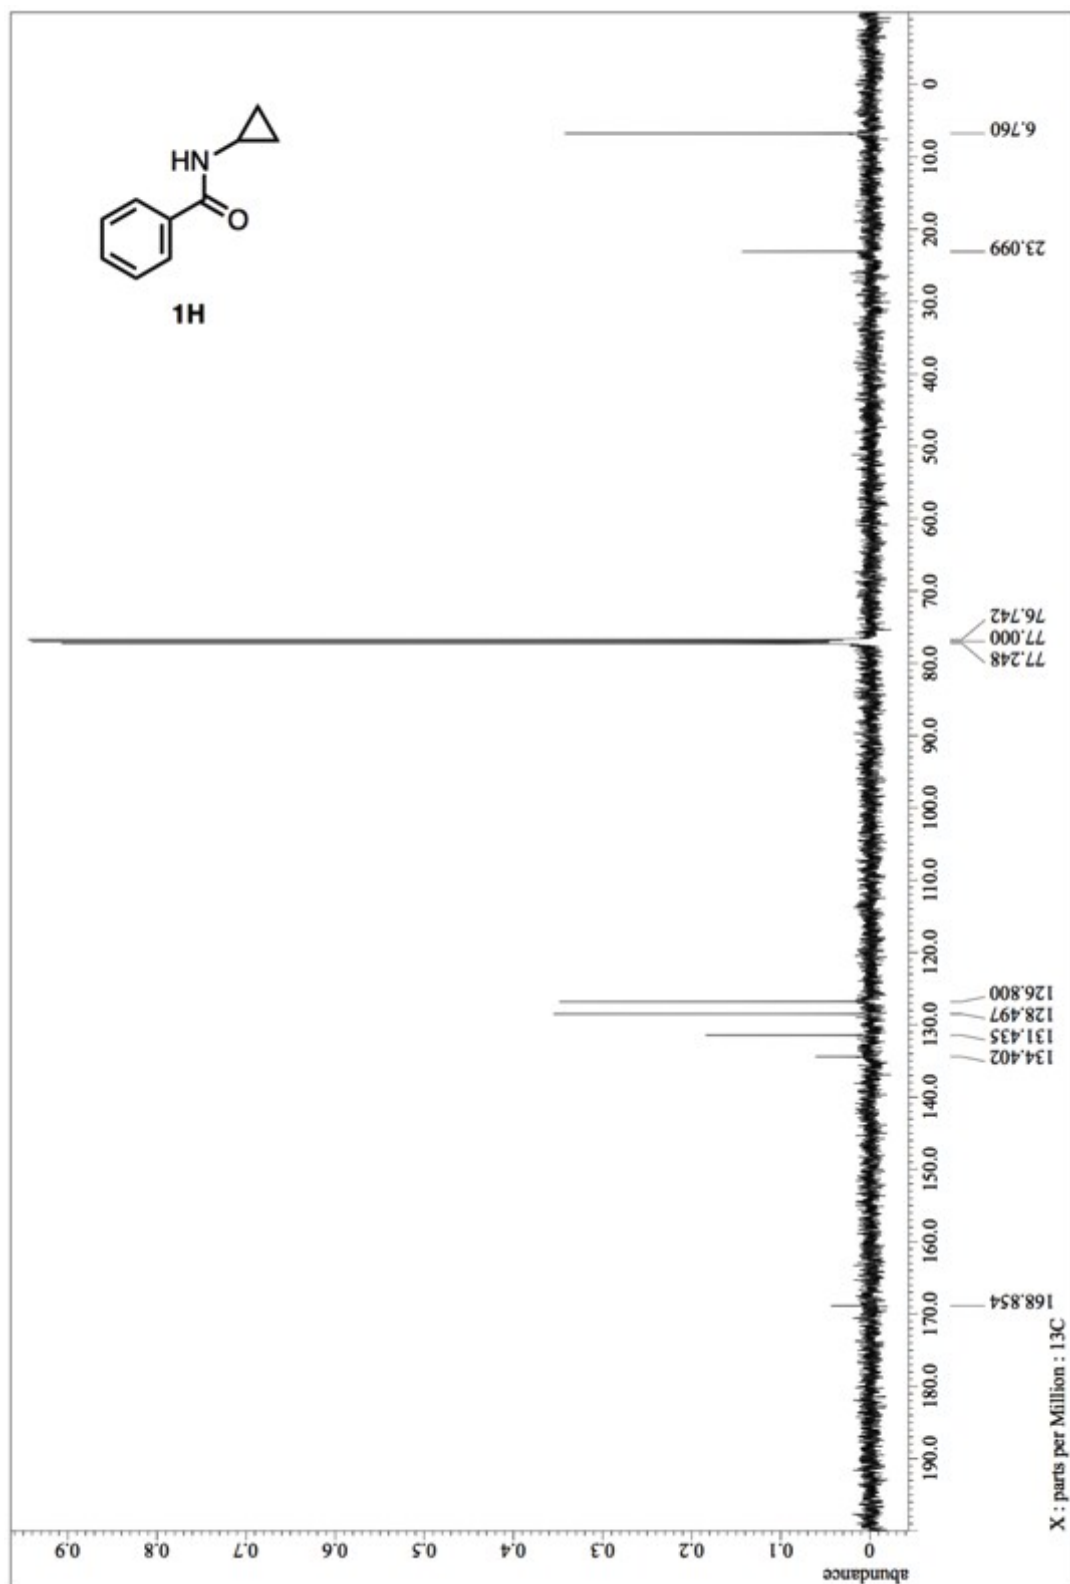



<sup>1</sup>H NMR (600MHz, CDCl<sub>3</sub>) of 1K

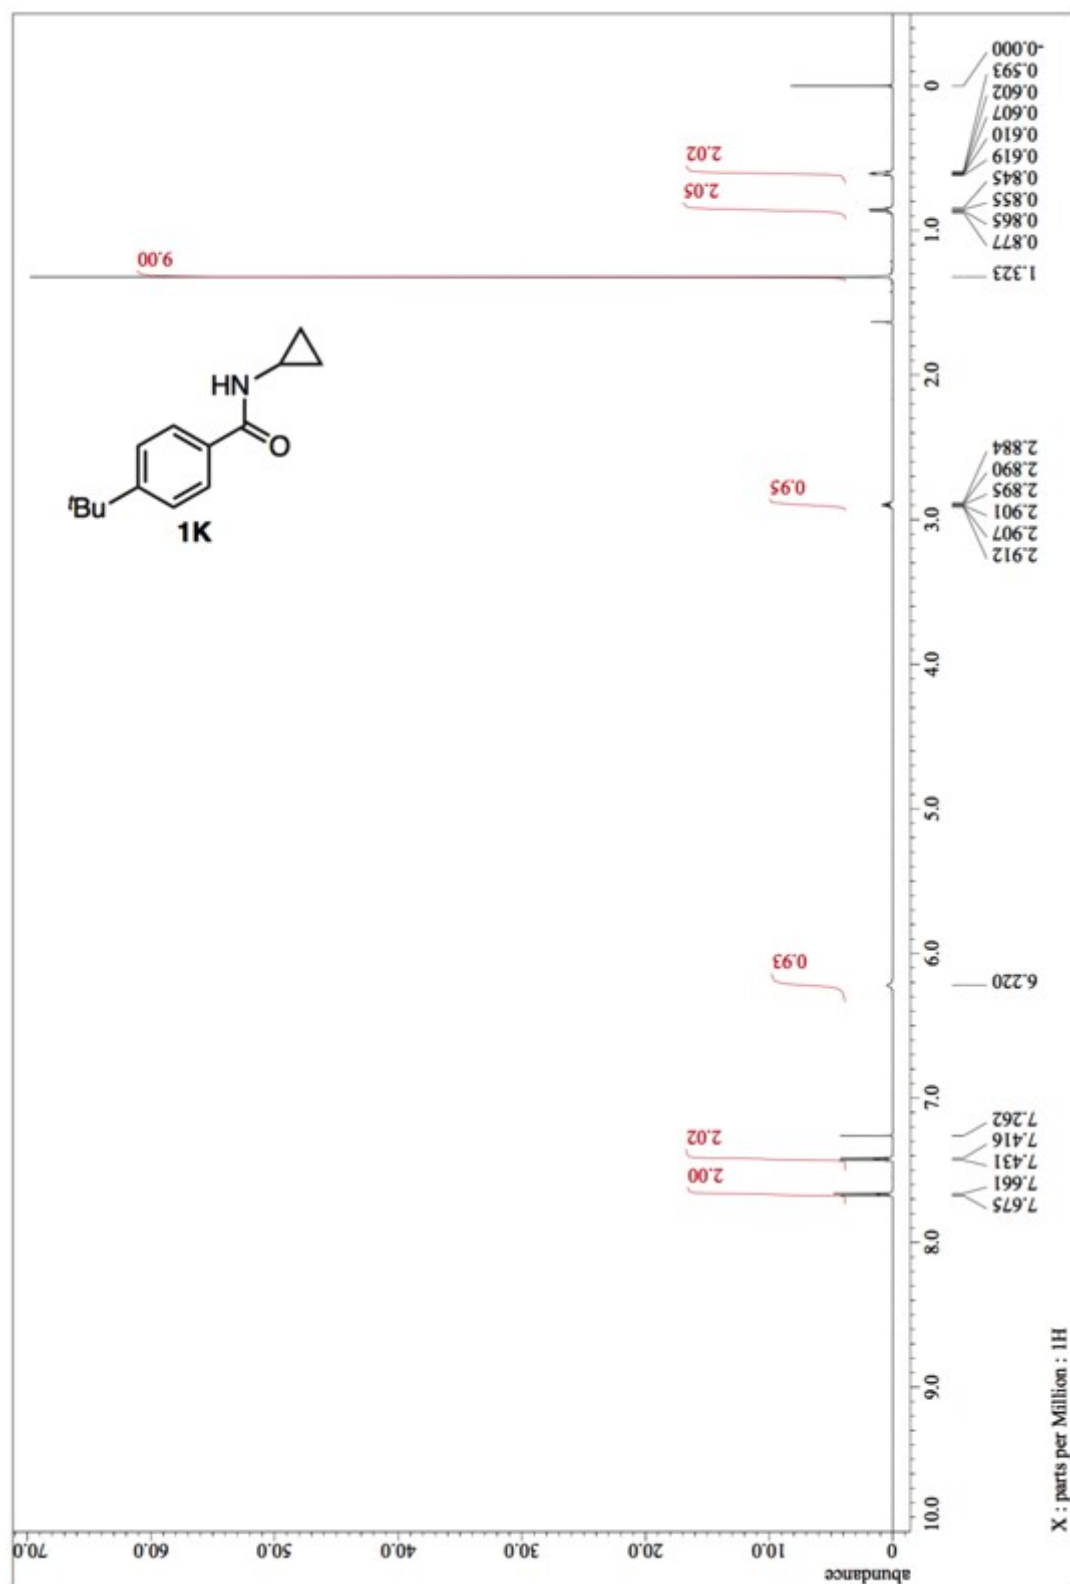

$^{13}\text{C}$  NMR (151MHz,  $\text{CDCl}_3$ ) of **1K**

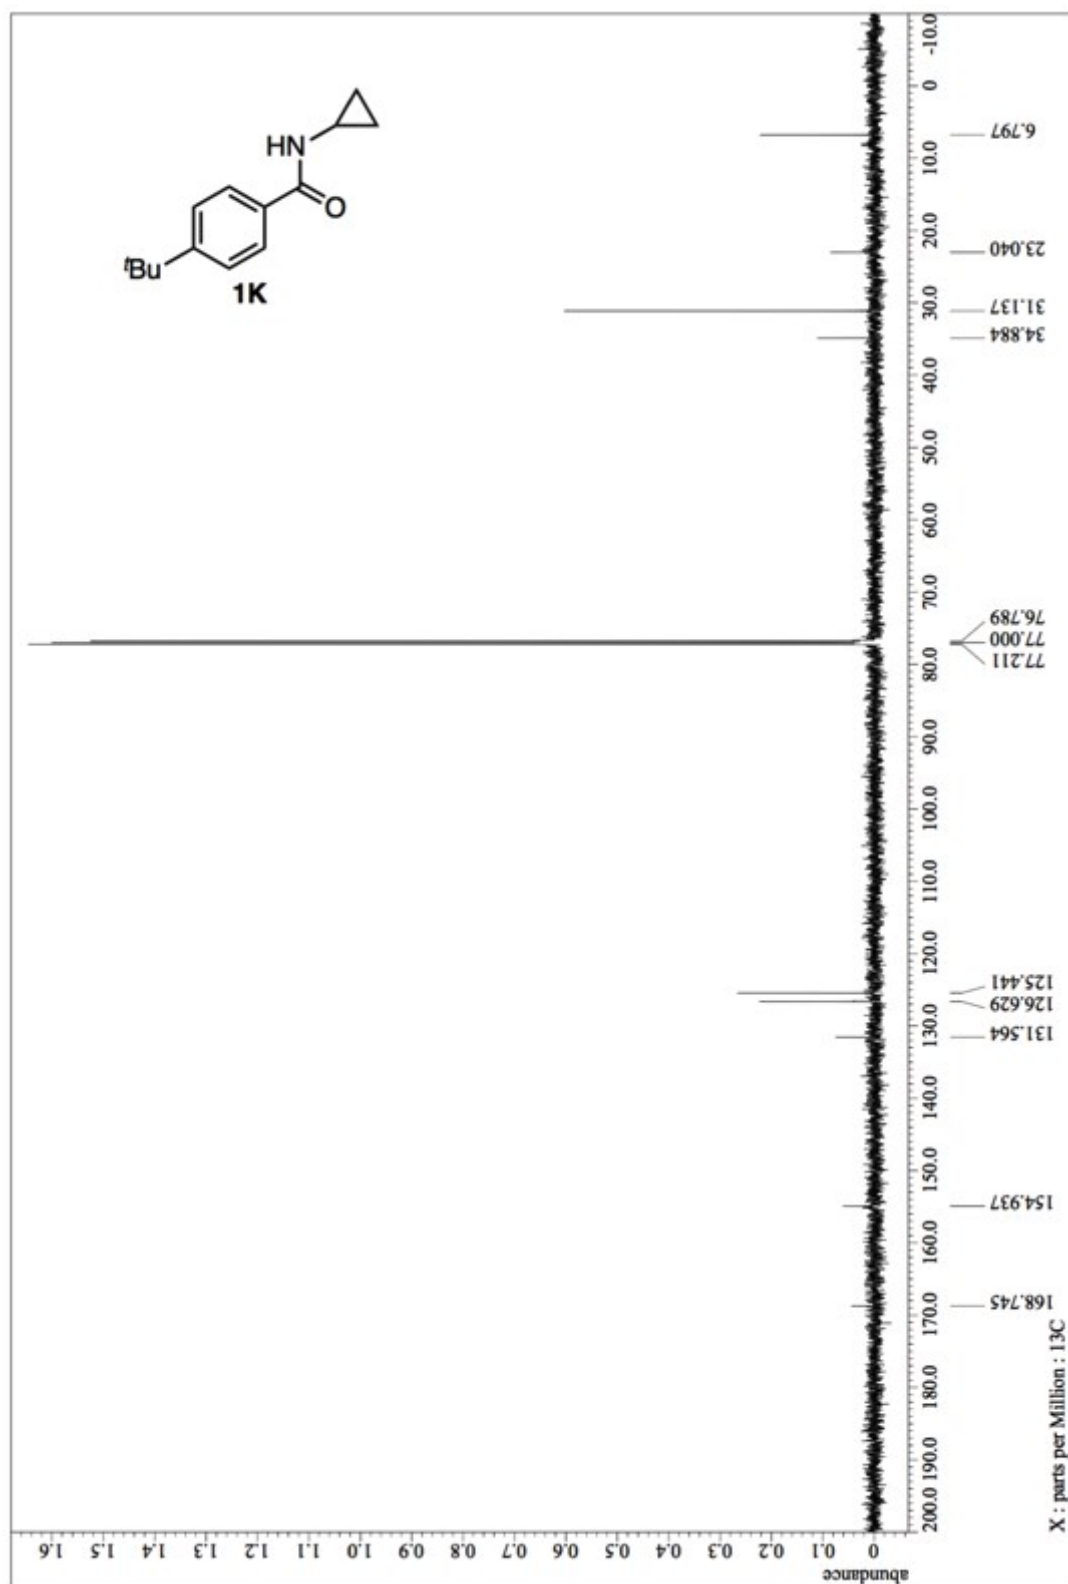

<sup>1</sup>H NMR (600MHz, CDCl<sub>3</sub>) of 1L

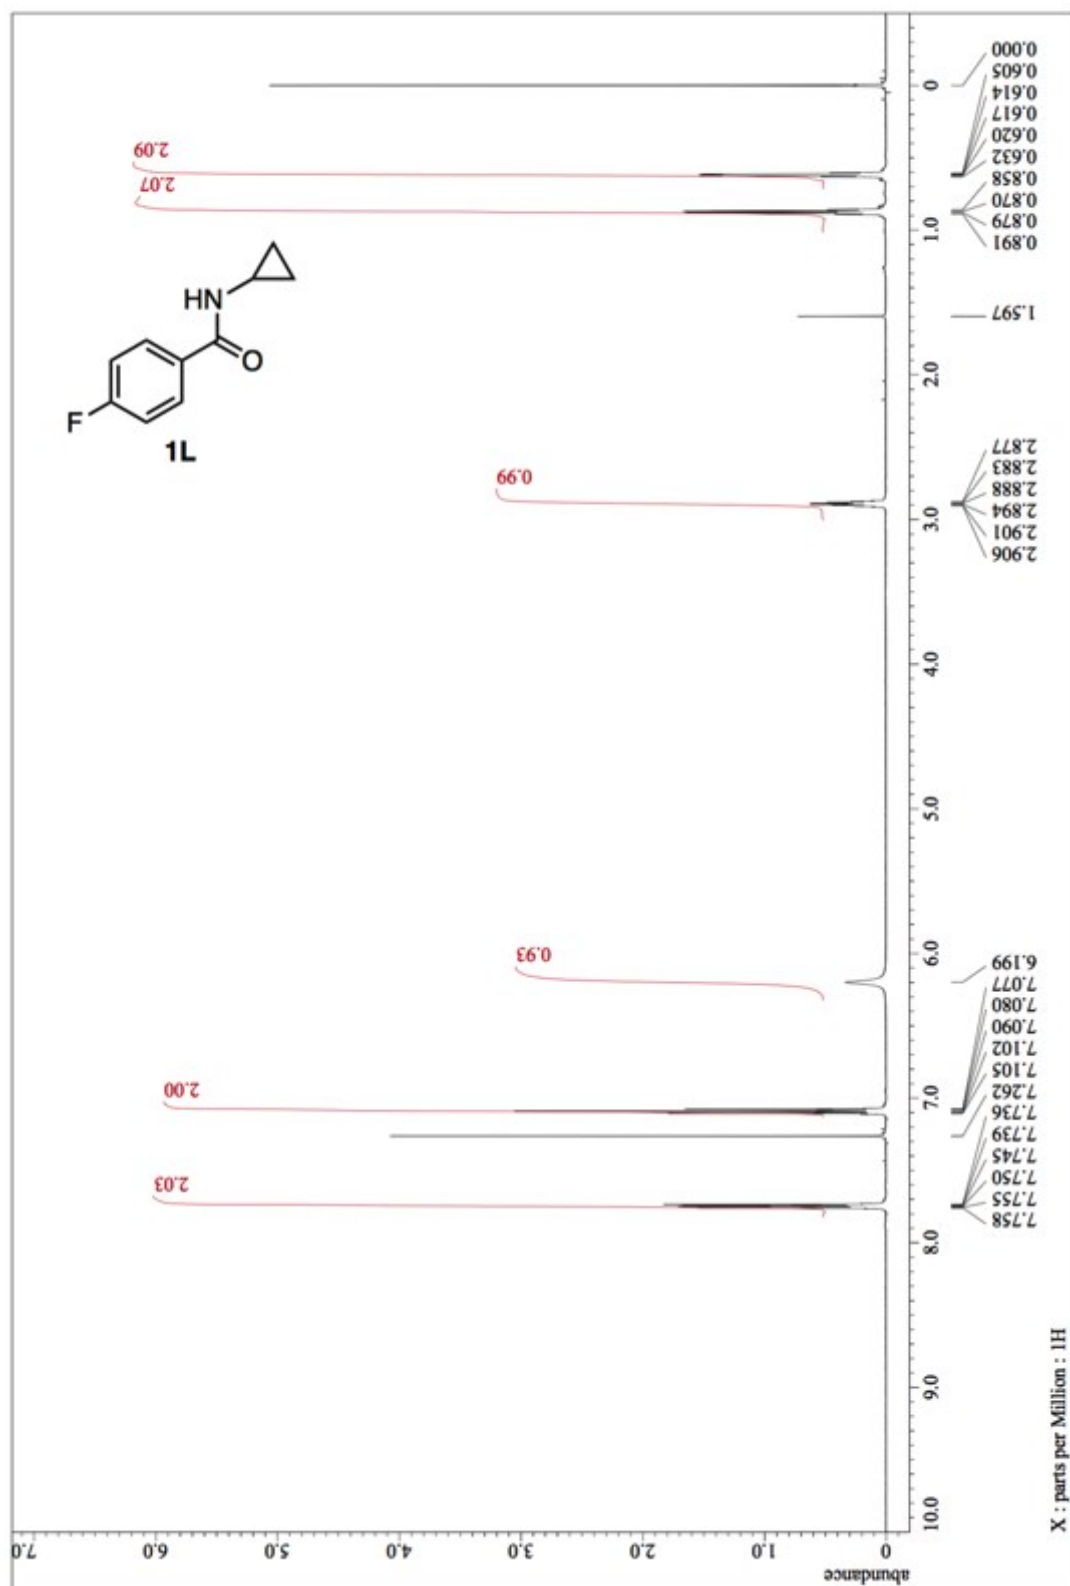

$^{13}\text{C}$  NMR (151MHz,  $\text{CDCl}_3$ ) of 1L

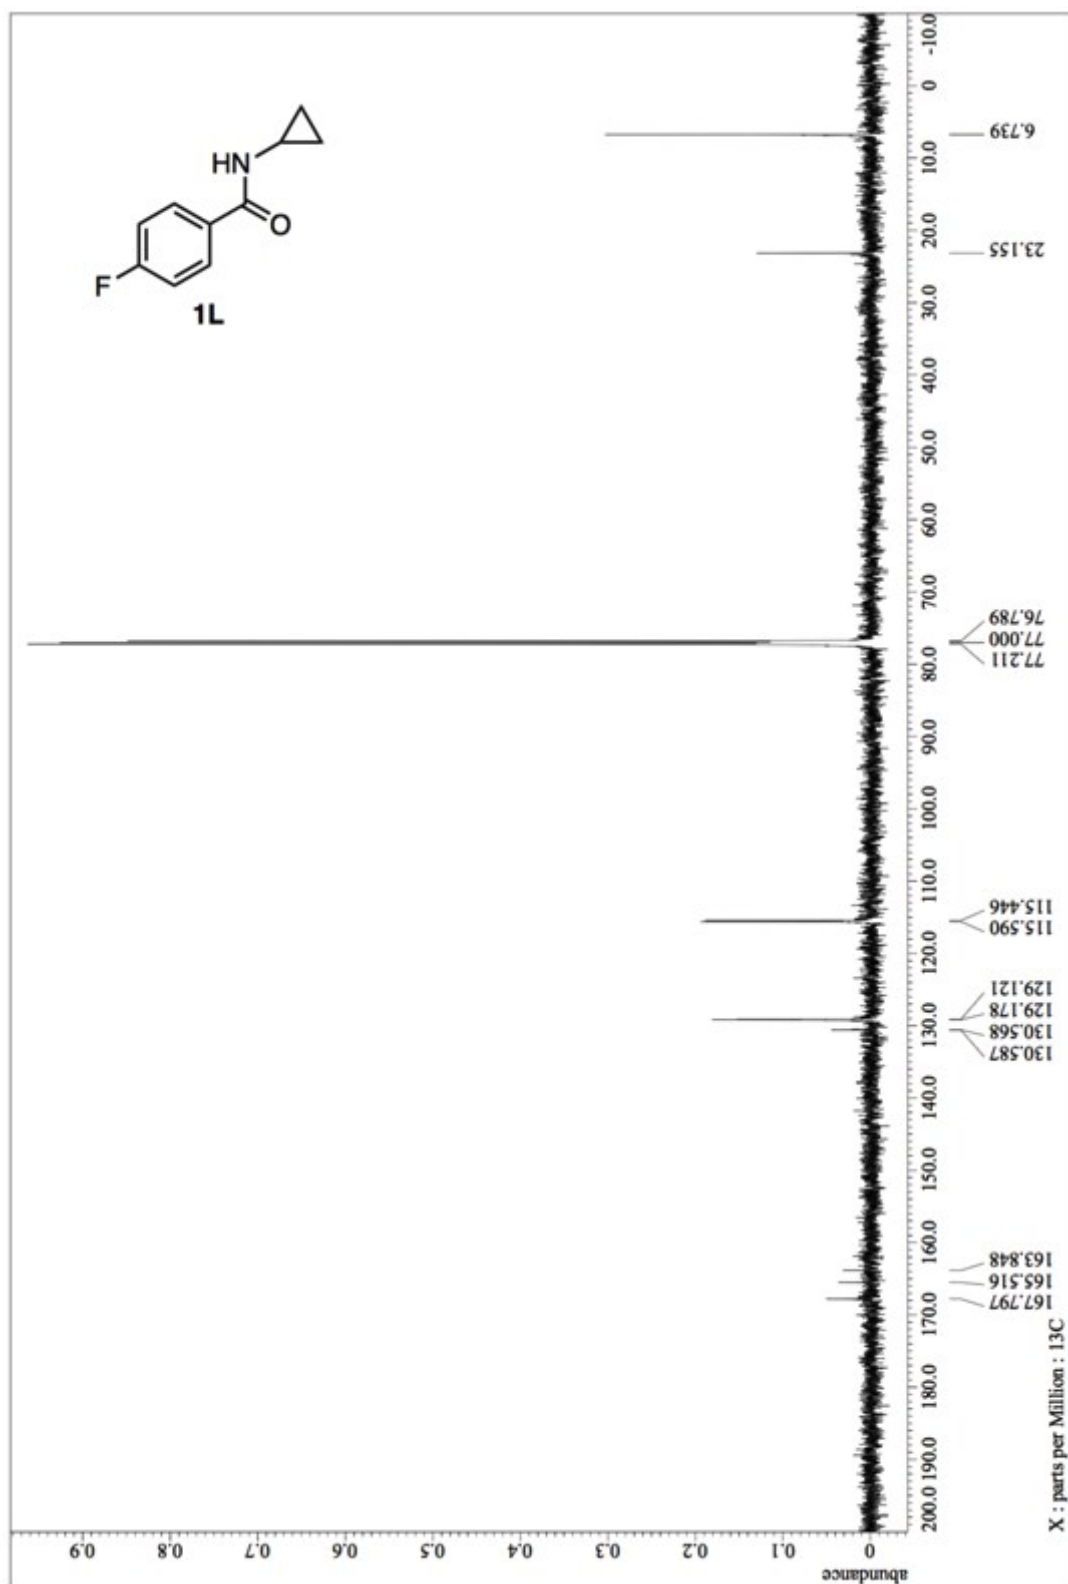

$^1\text{H}$  NMR (600MHz,  $\text{CDCl}_3$ ) of 1M

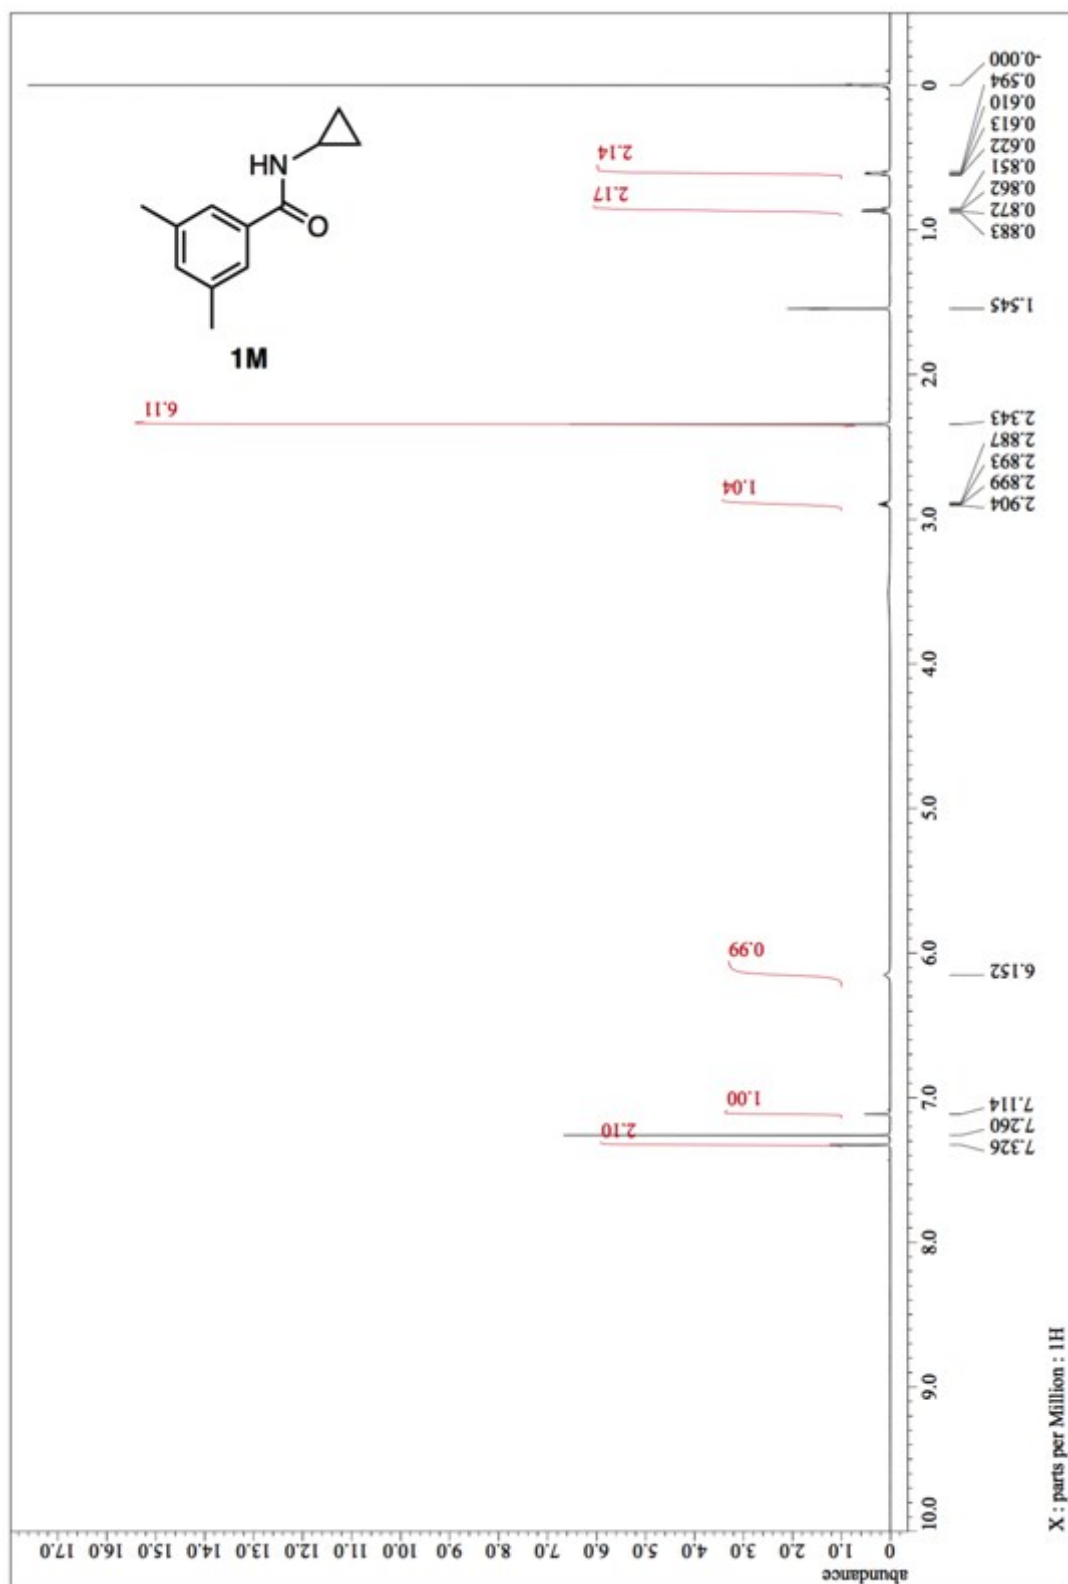

$^{13}\text{C}$  NMR (126MHz,  $\text{CDCl}_3$ ) of 1M

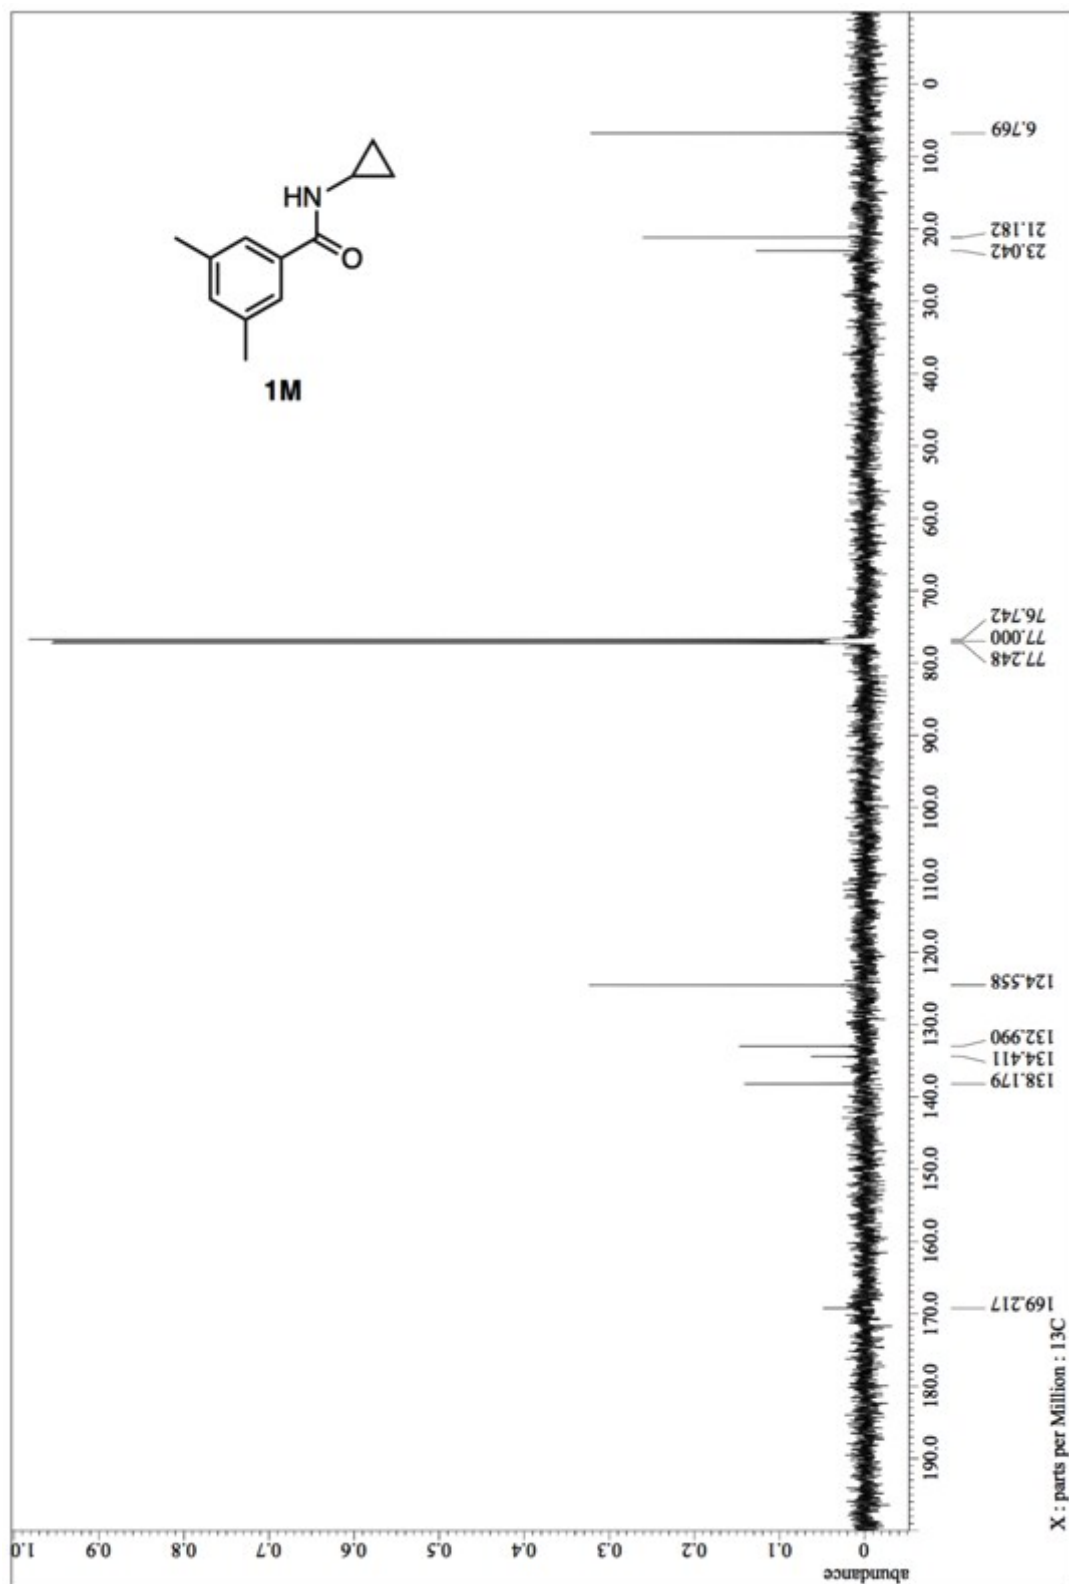

$^1\text{H}$  NMR (600MHz,  $\text{CDCl}_3$ ) of 1N

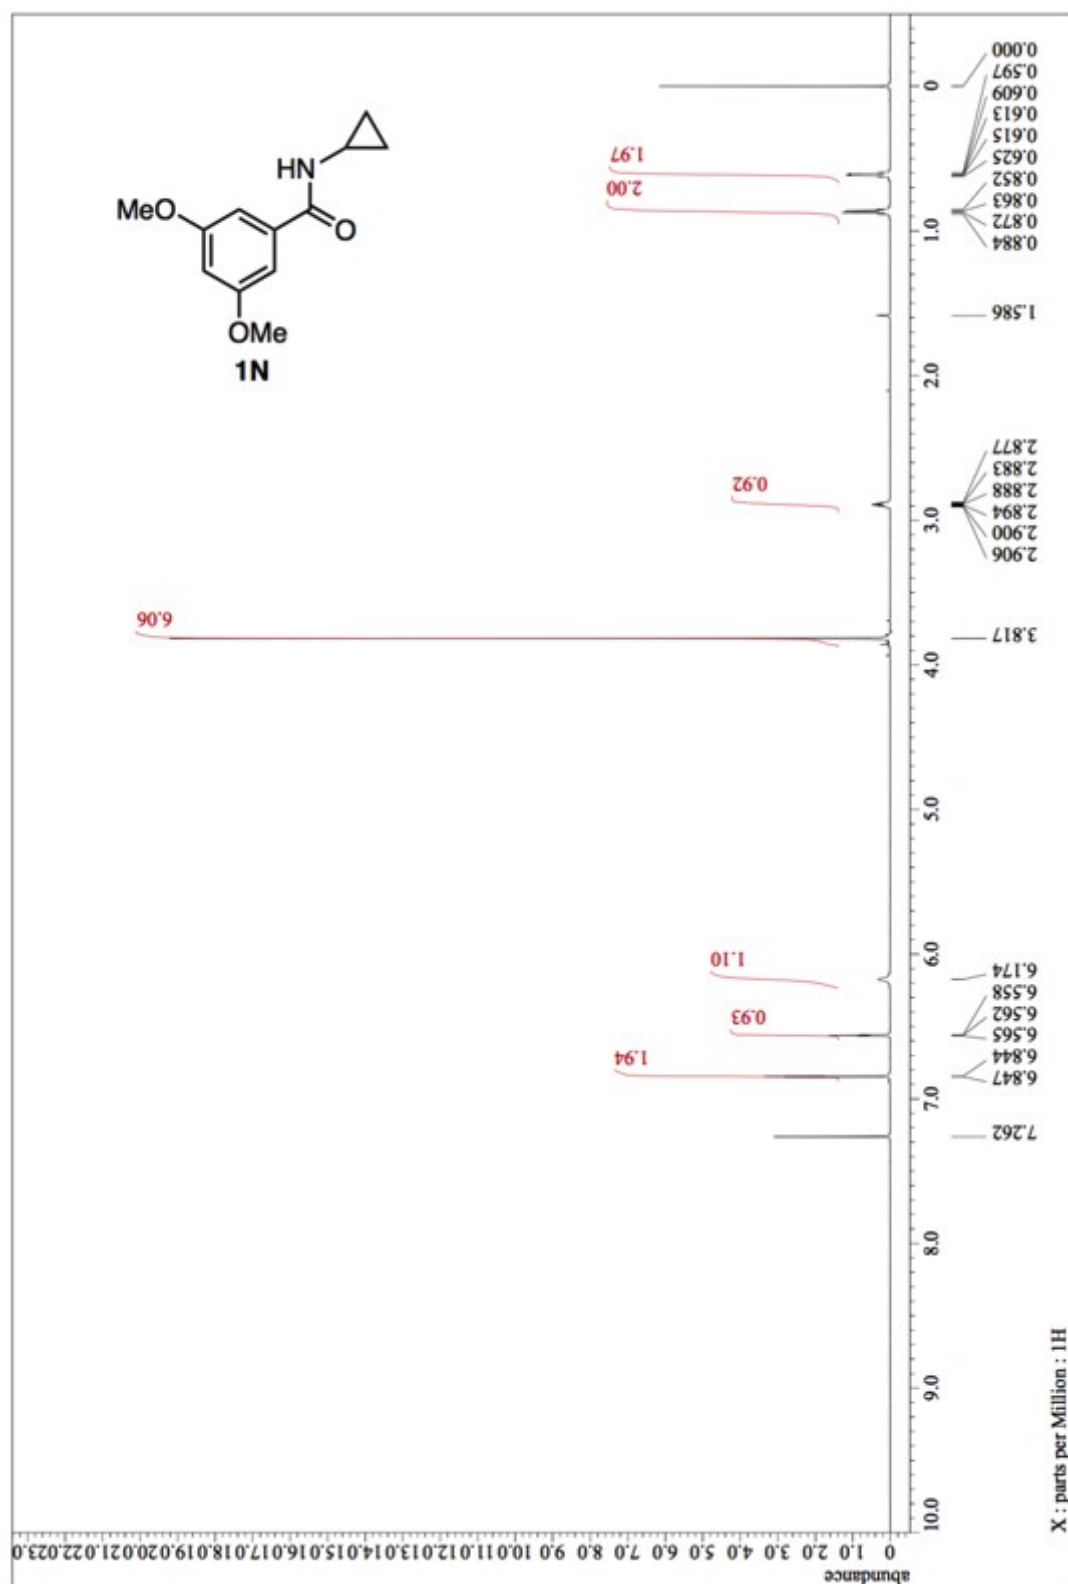

$^{13}\text{C}$  NMR (151MHz,  $\text{CDCl}_3$ ) of 1N

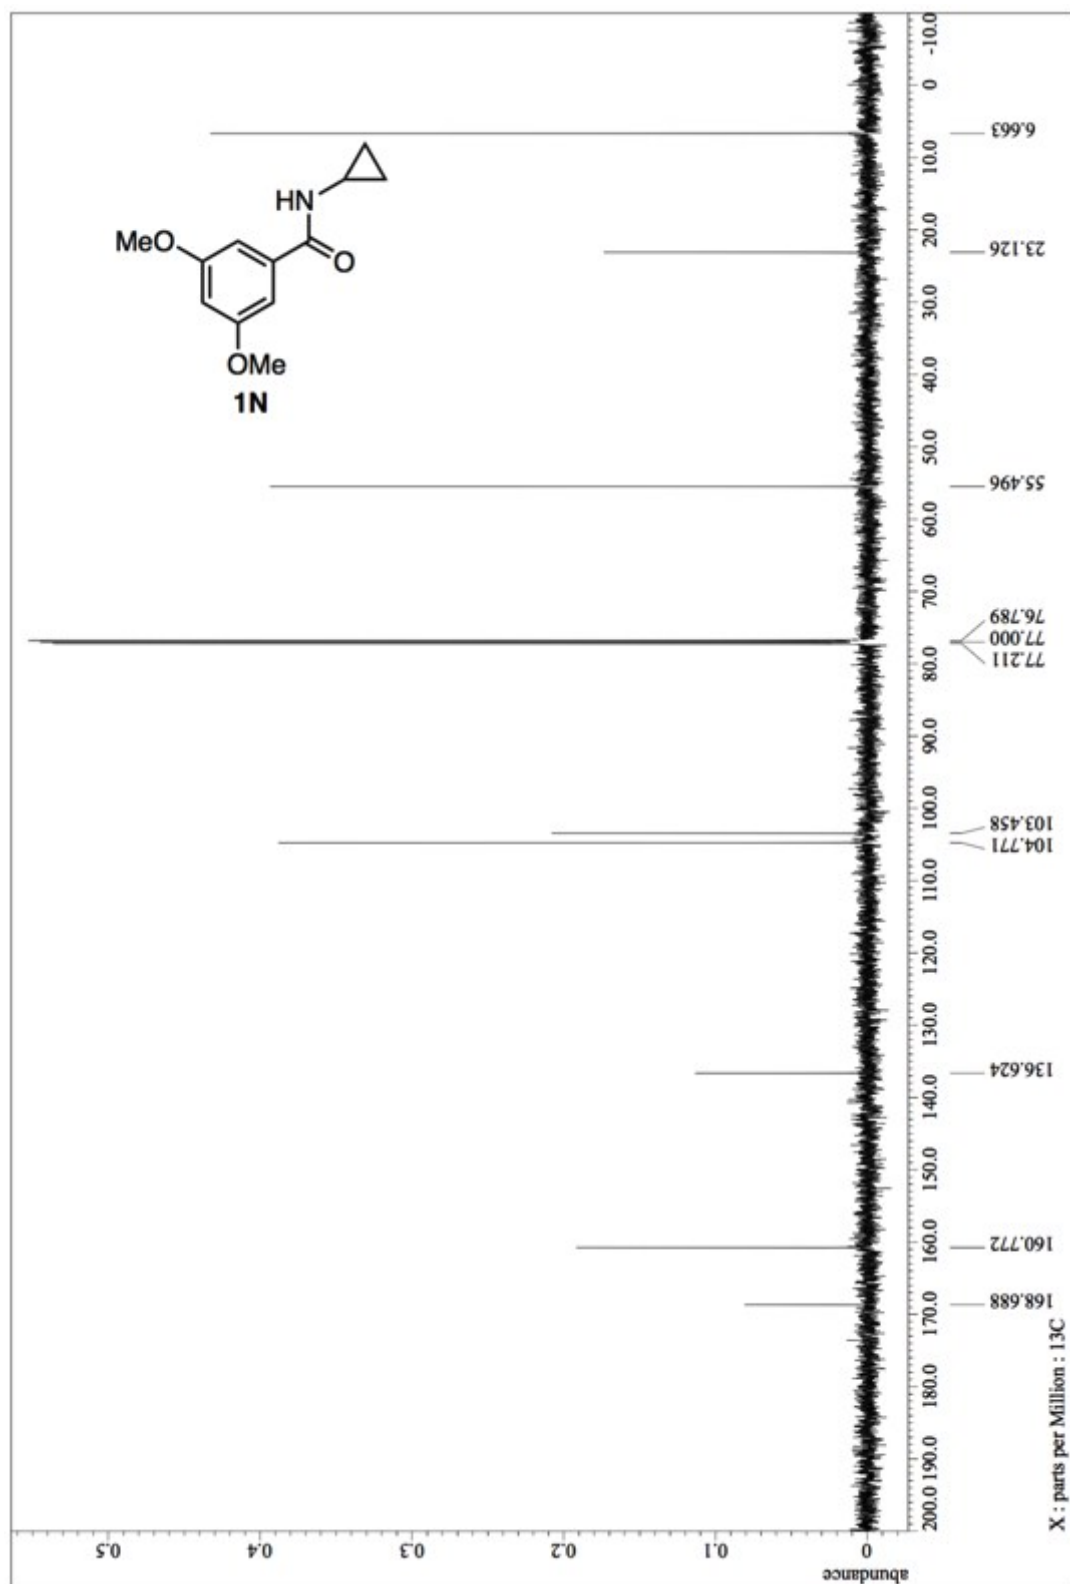



$^1\text{H}$  NMR (600MHz,  $\text{CDCl}_3$ ) of **10**

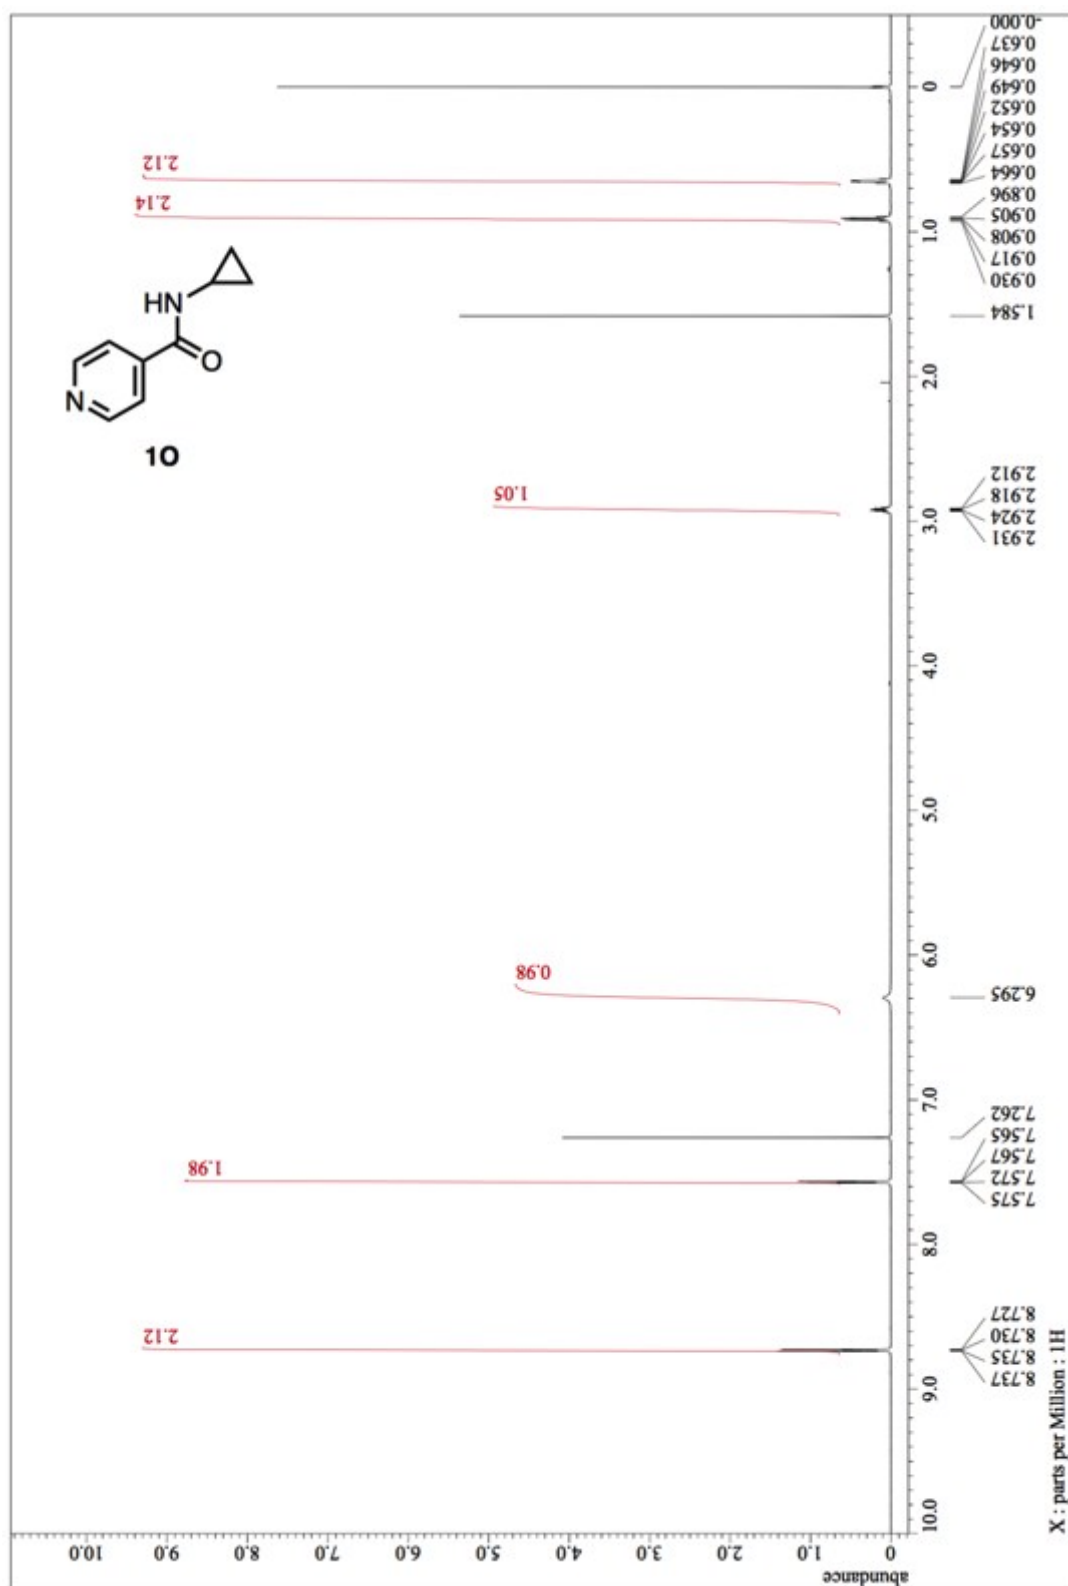

$^{13}\text{C}$  NMR (126MHz,  $\text{CDCl}_3$ ) of **10**

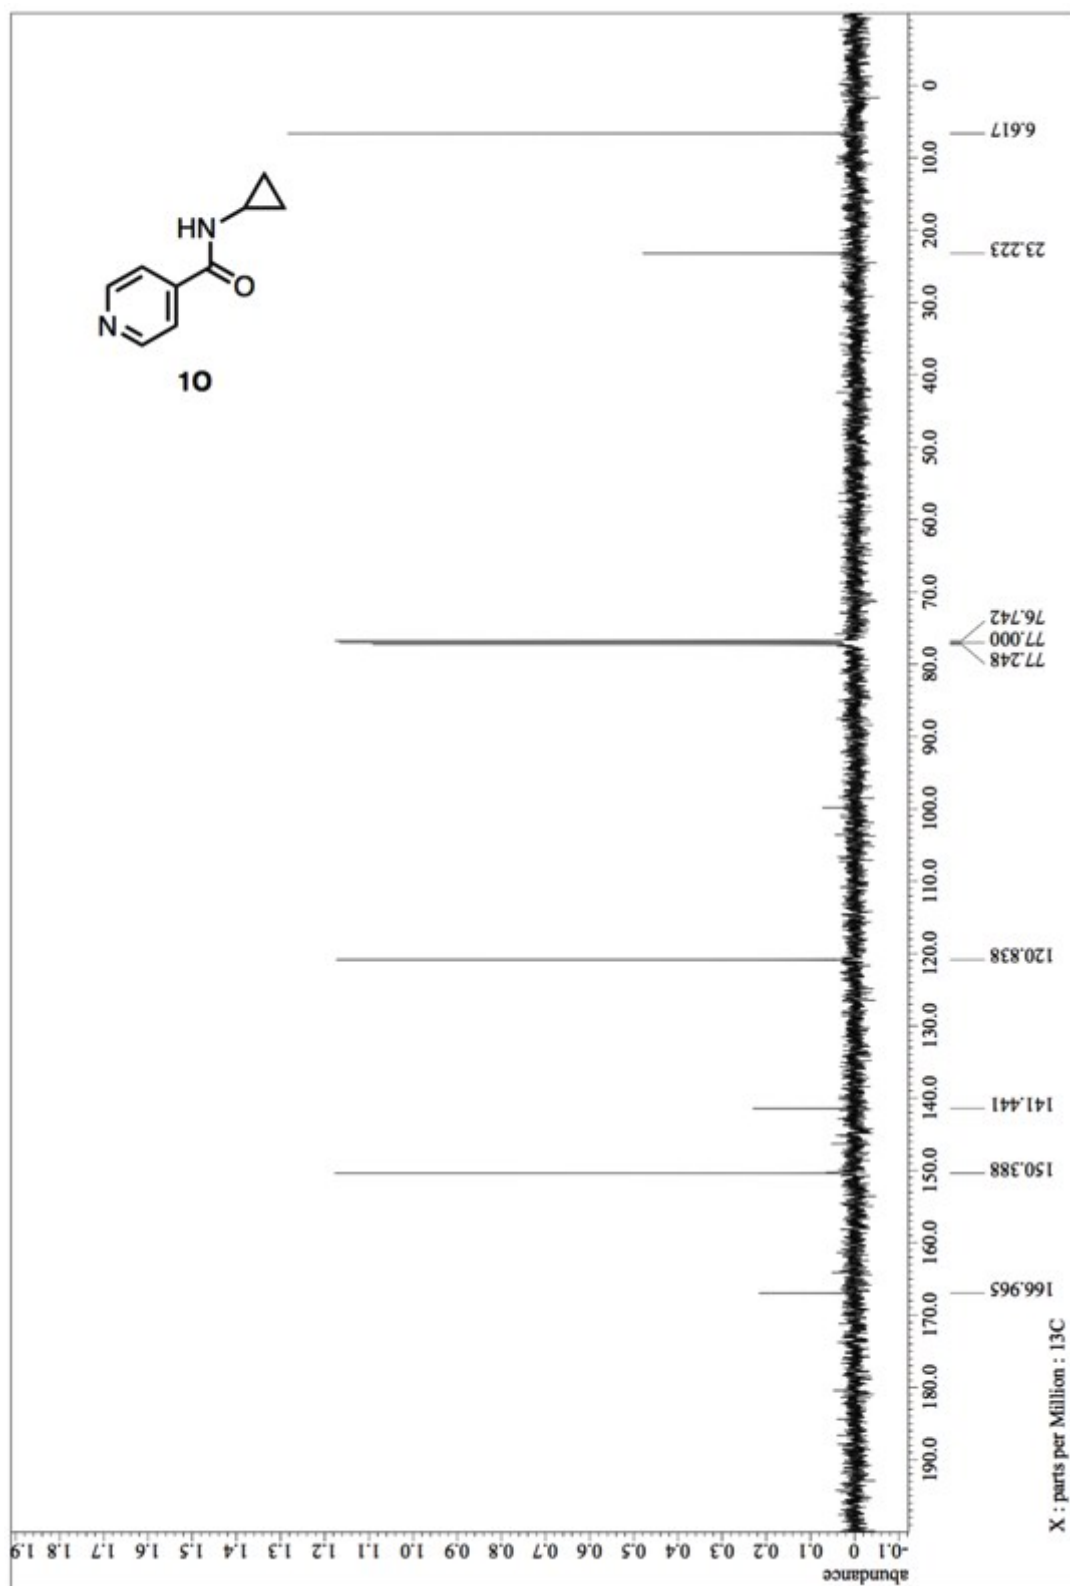

<sup>1</sup>H NMR (600MHz, CDCl<sub>3</sub>) of 1P

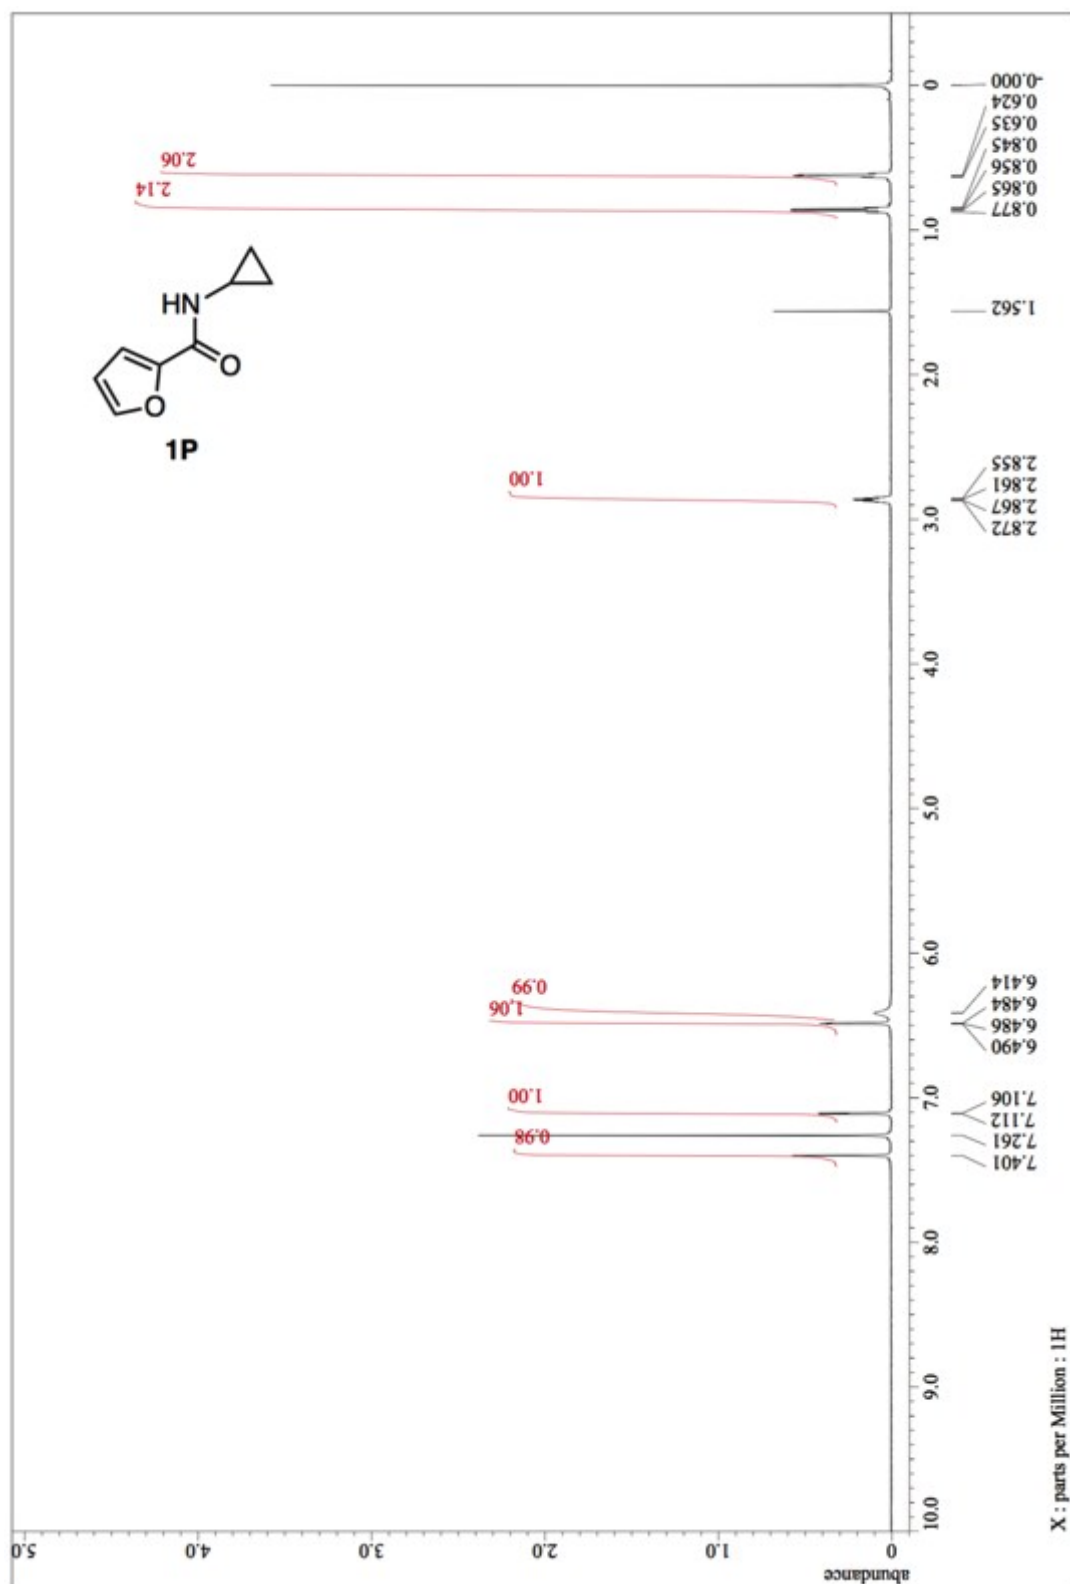

$^{13}\text{C}$  NMR (151MHz,  $\text{CDCl}_3$ ) of **1P**

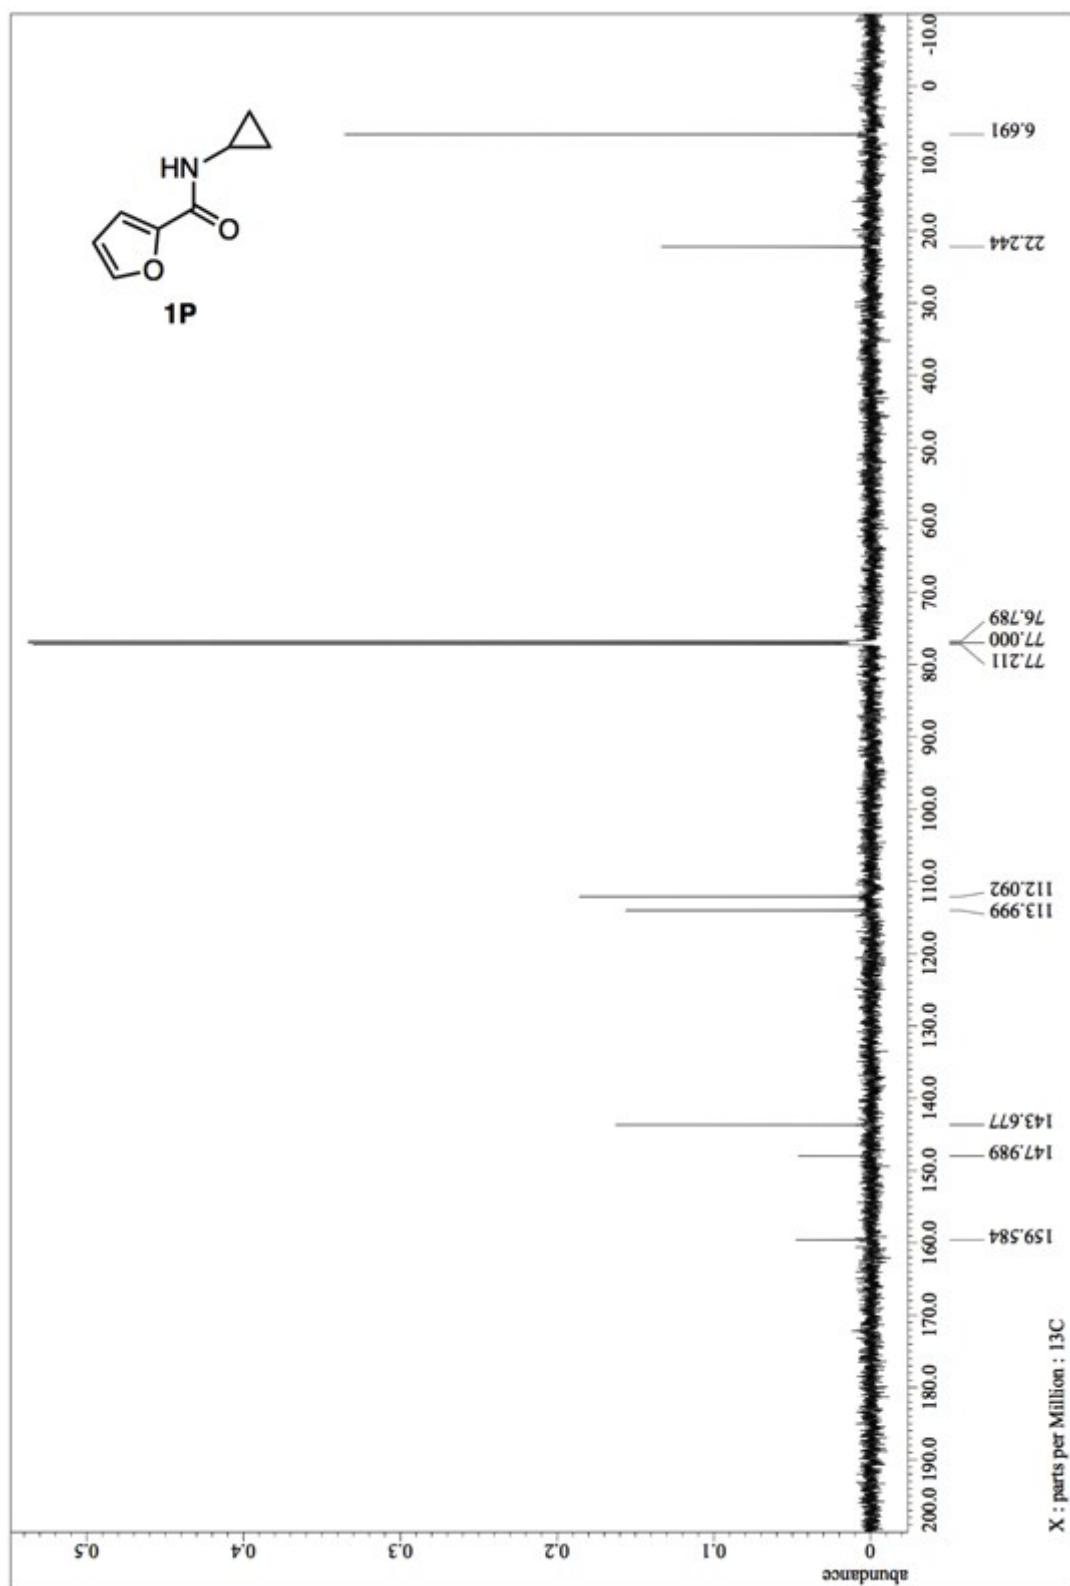

<sup>1</sup>H NMR (600MHz, CDCl<sub>3</sub>) of 1Q

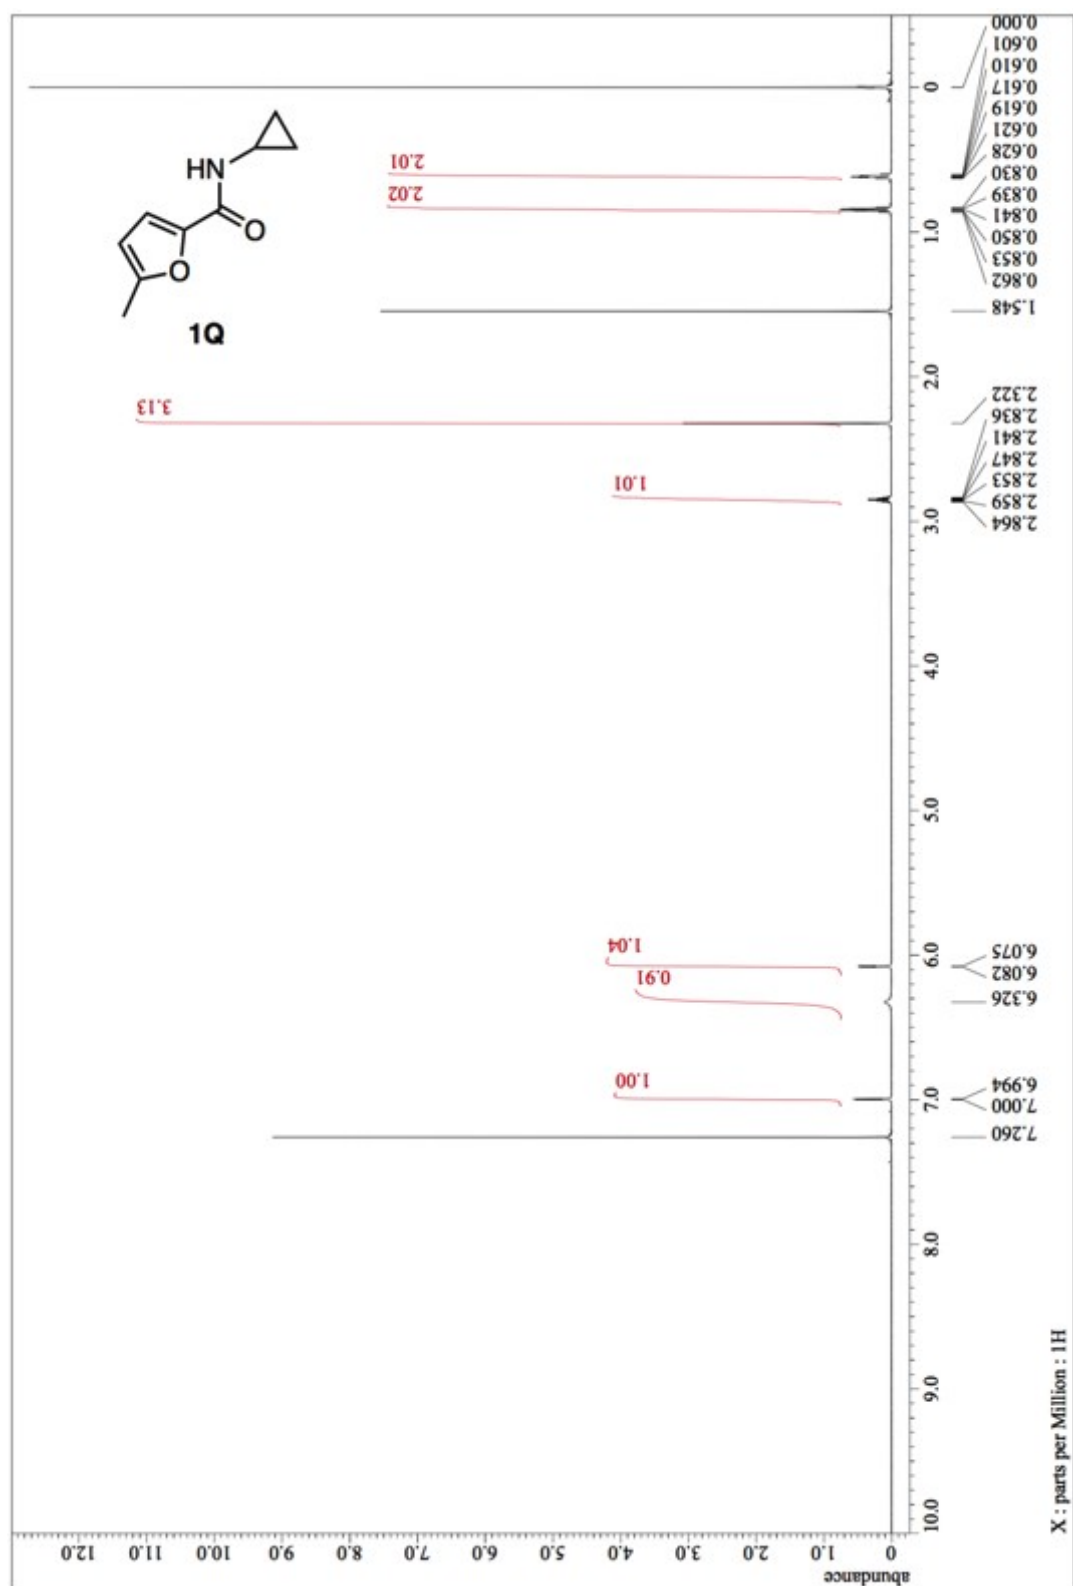

$^{13}\text{C}$  NMR (126MHz,  $\text{CDCl}_3$ ) of **1Q**

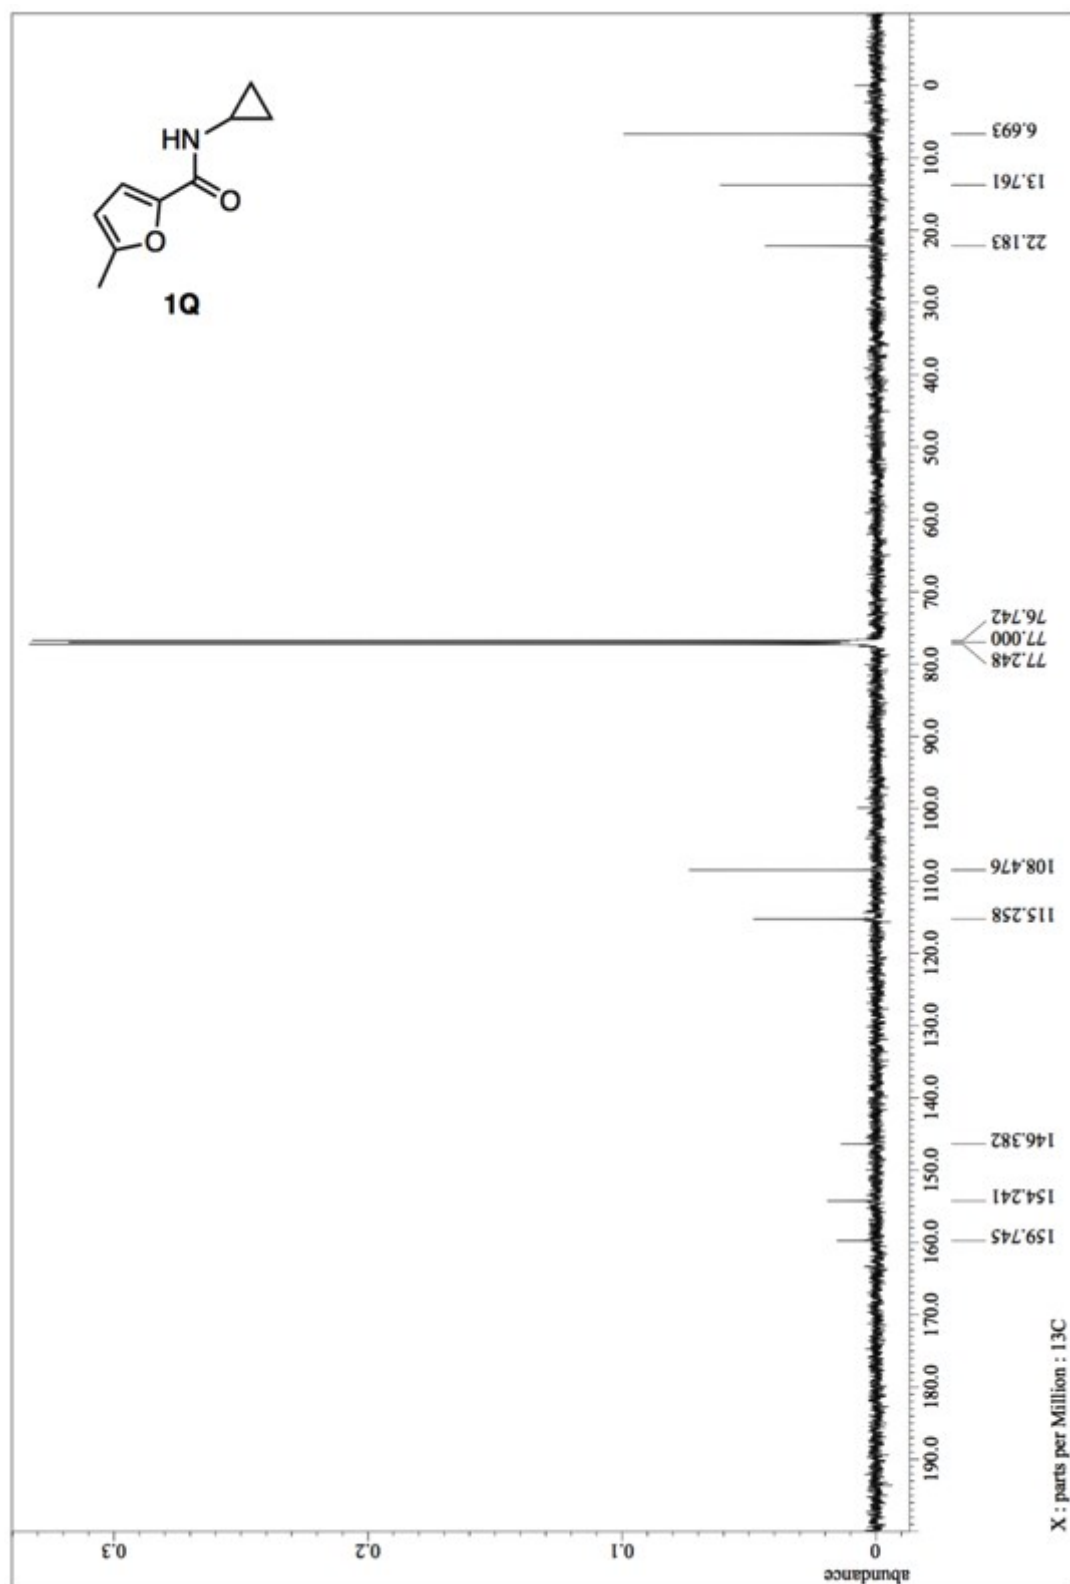

$^1\text{H}$  NMR (600MHz,  $\text{CDCl}_3$ ) of 1R

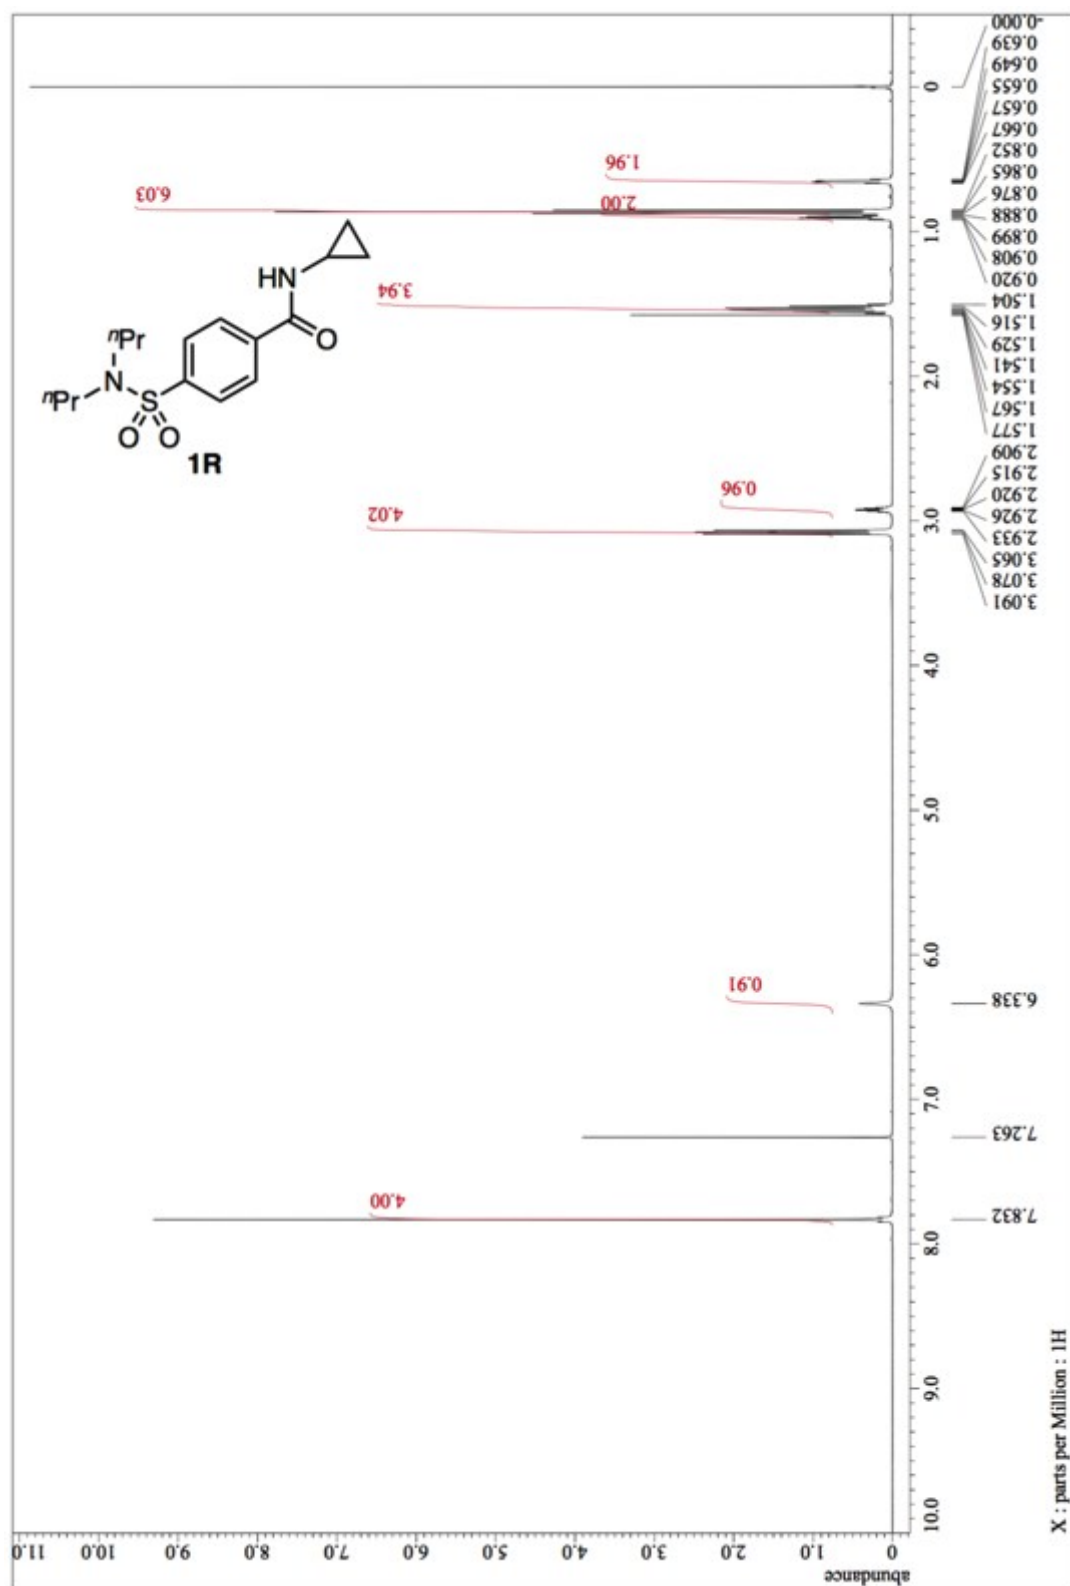

$^{13}\text{C}$  NMR (151MHz,  $\text{CDCl}_3$ ) of 1R

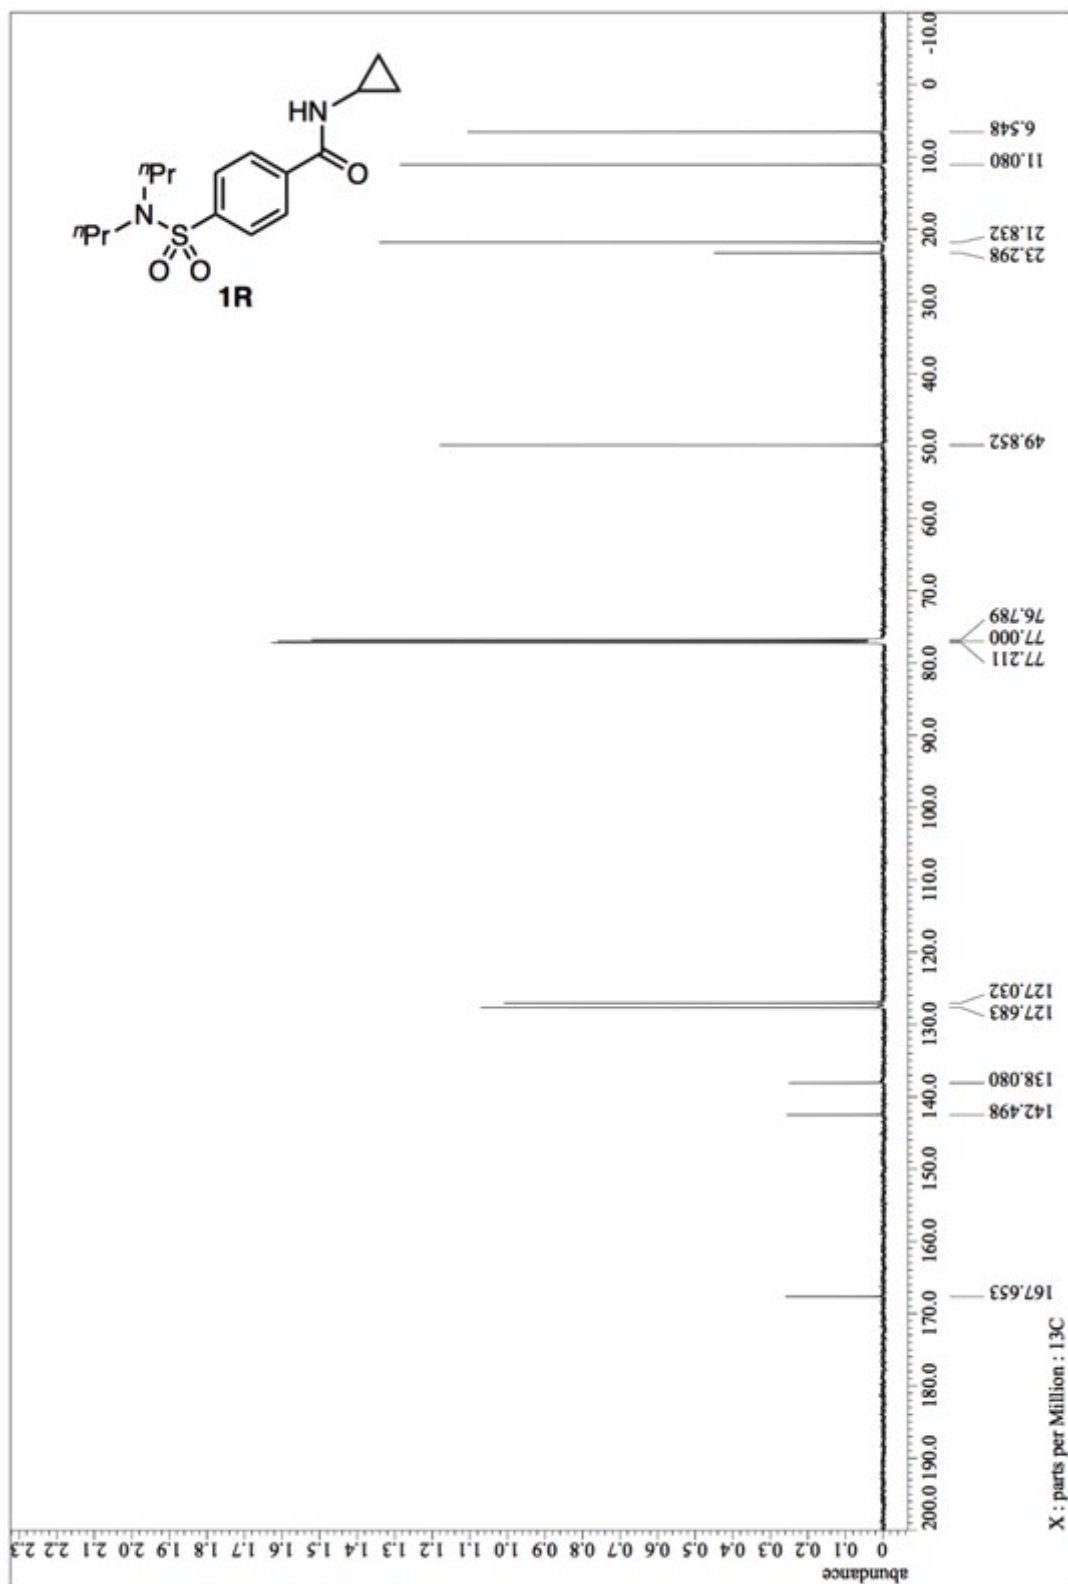



$^1\text{H}$  NMR (600 MHz, 90 °C, DMSO- $d_6$ ) of **1S**

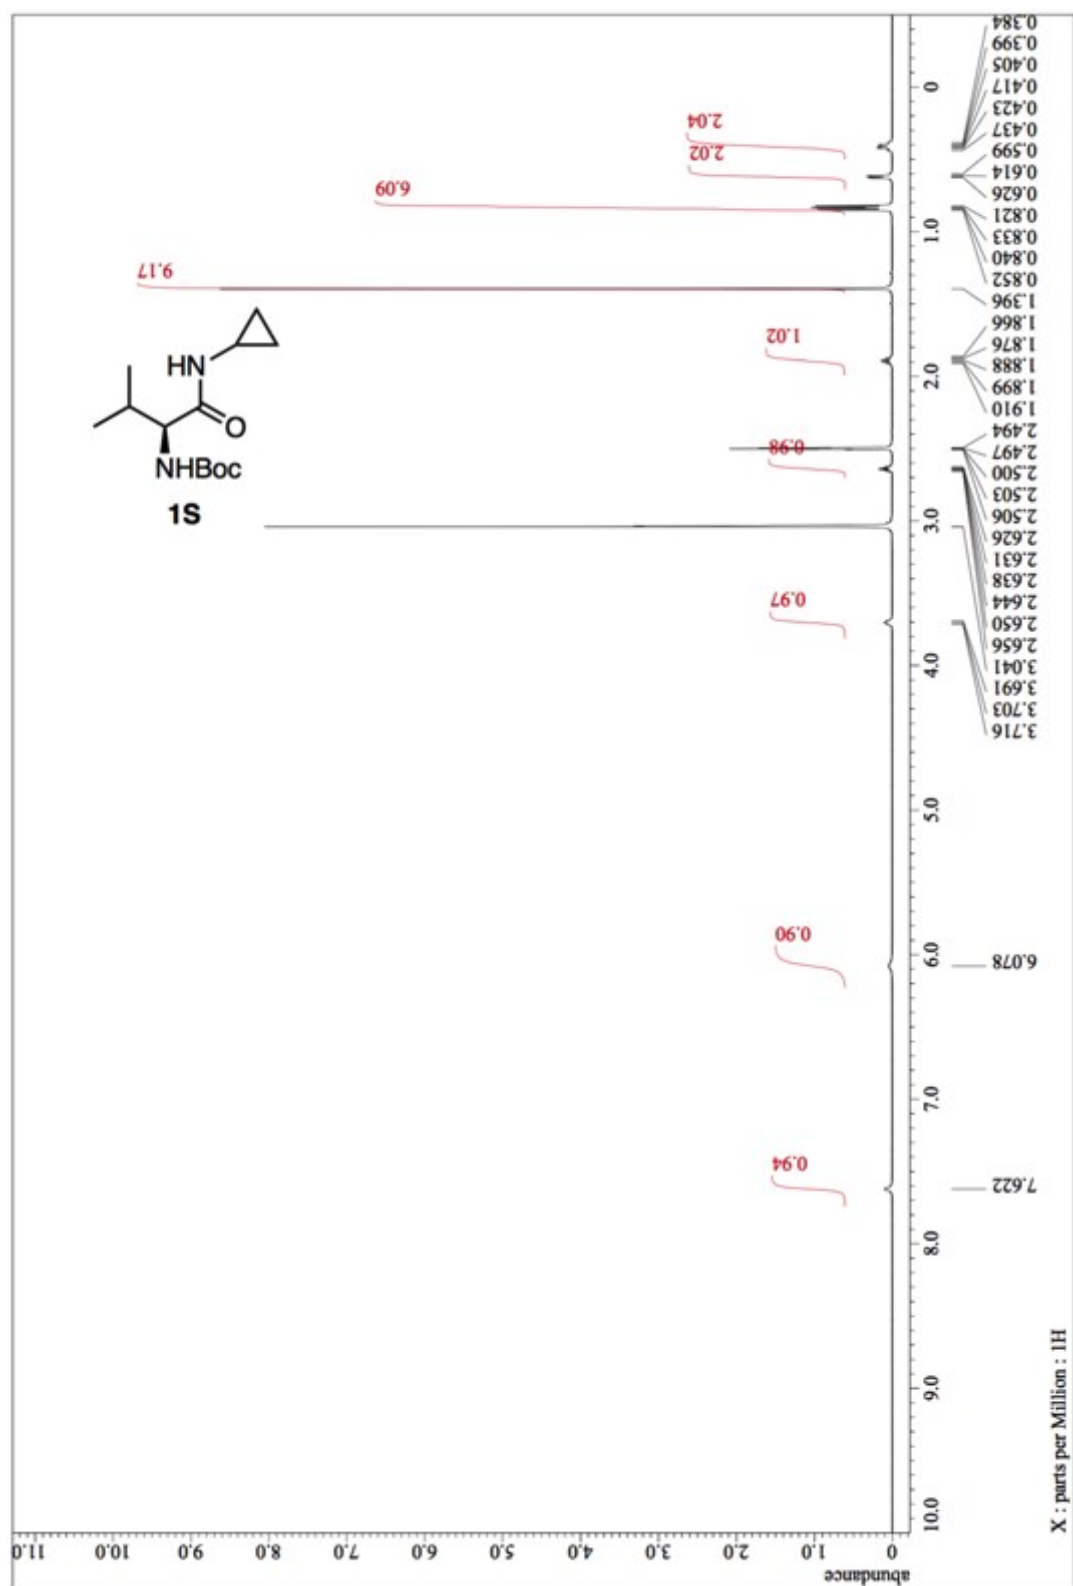

$^{13}\text{C}$  NMR (151 MHz, 90 °C,  $\text{DMSO-}d_6$ ) of **1S**

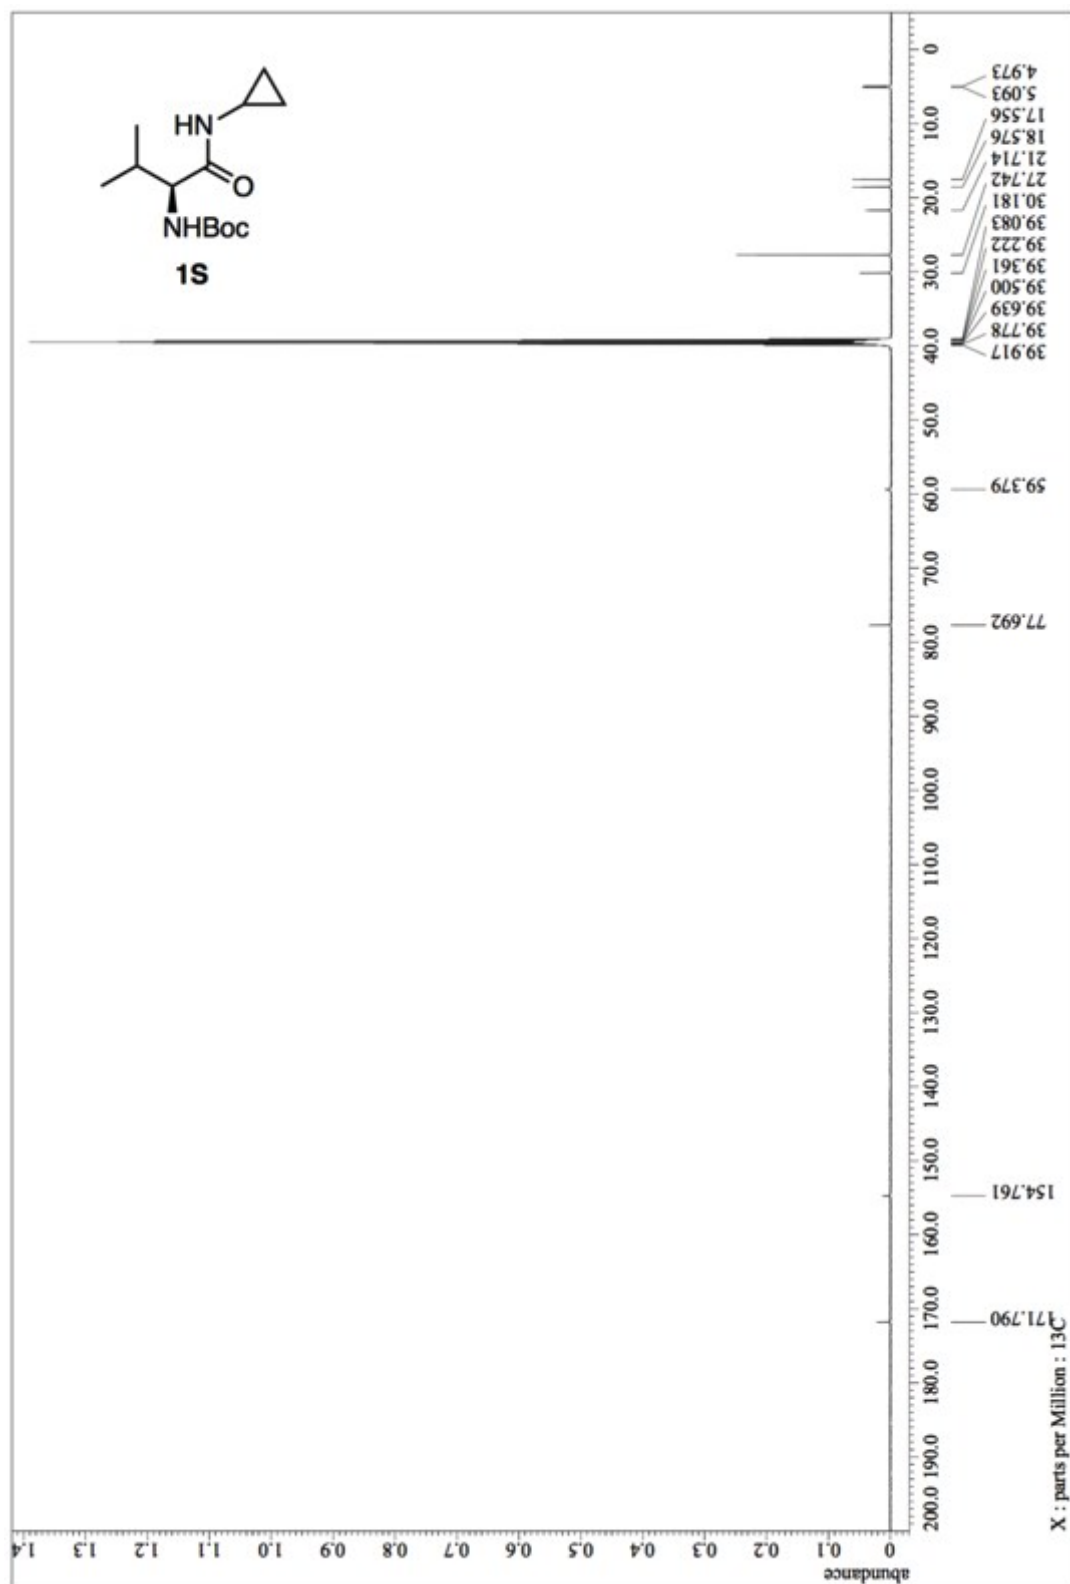

$^1\text{H}$  NMR (500 MHz, 90 °C, DMSO- $d_6$ ) of 1T

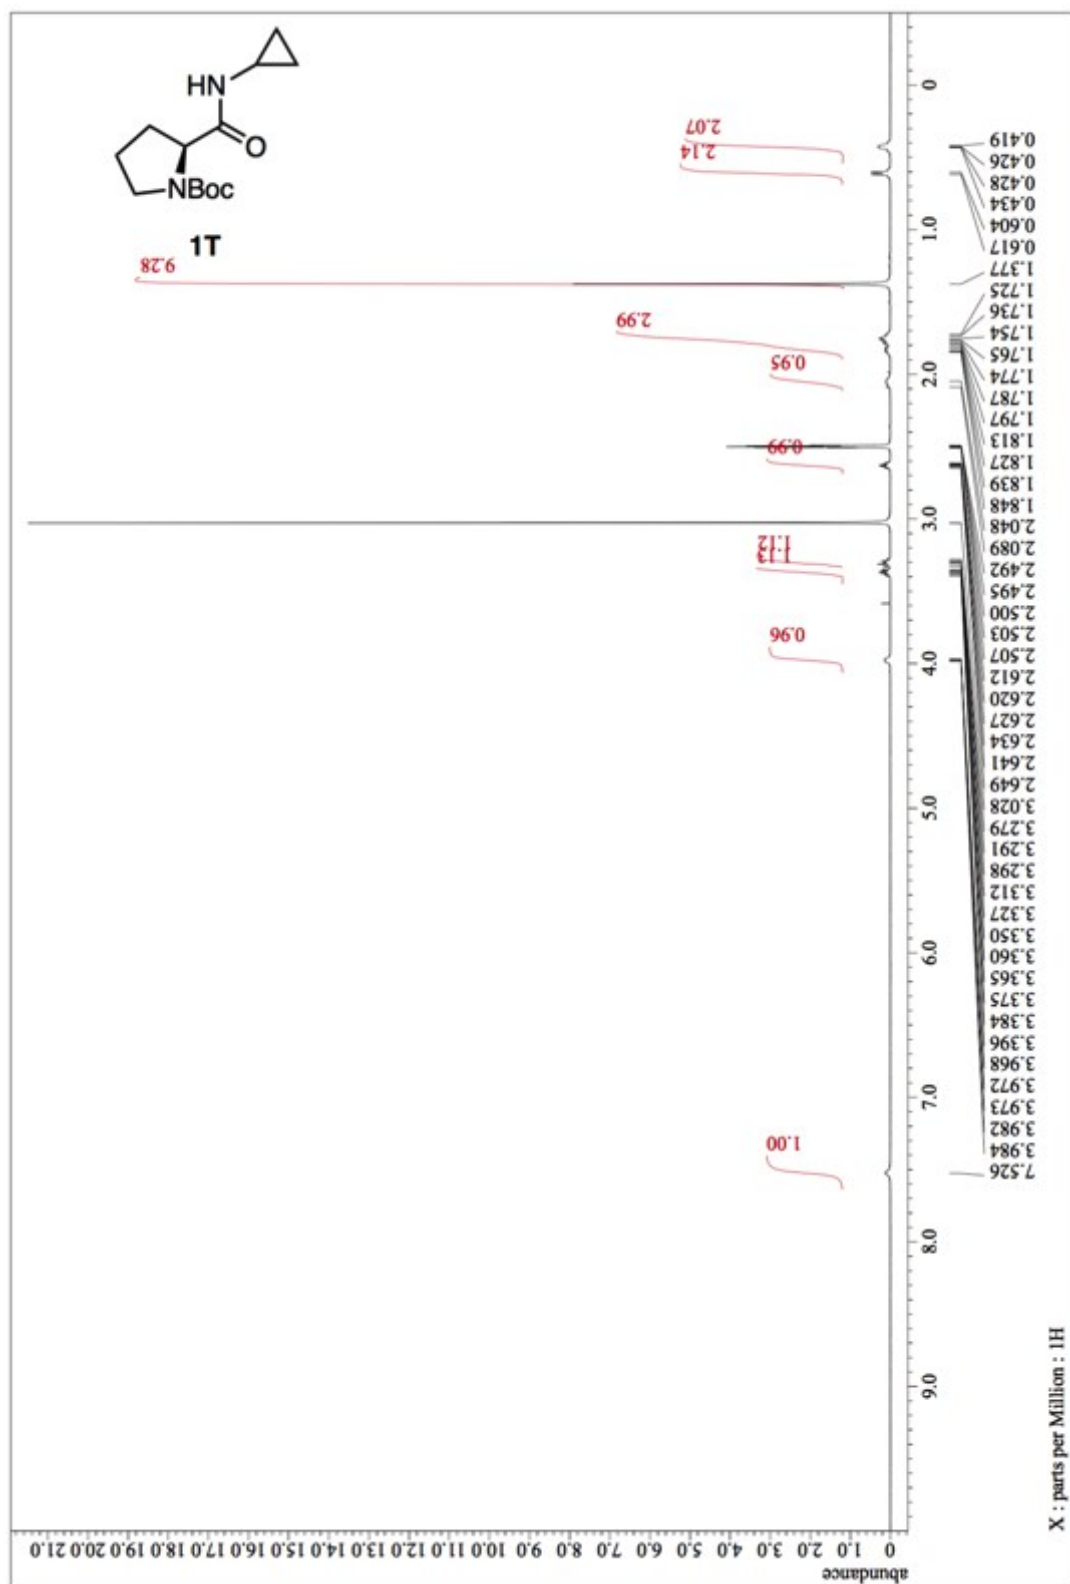

$^{13}\text{C}$  NMR (126 MHz, 90 °C,  $\text{DMSO}-d_6$ ) of **1T**

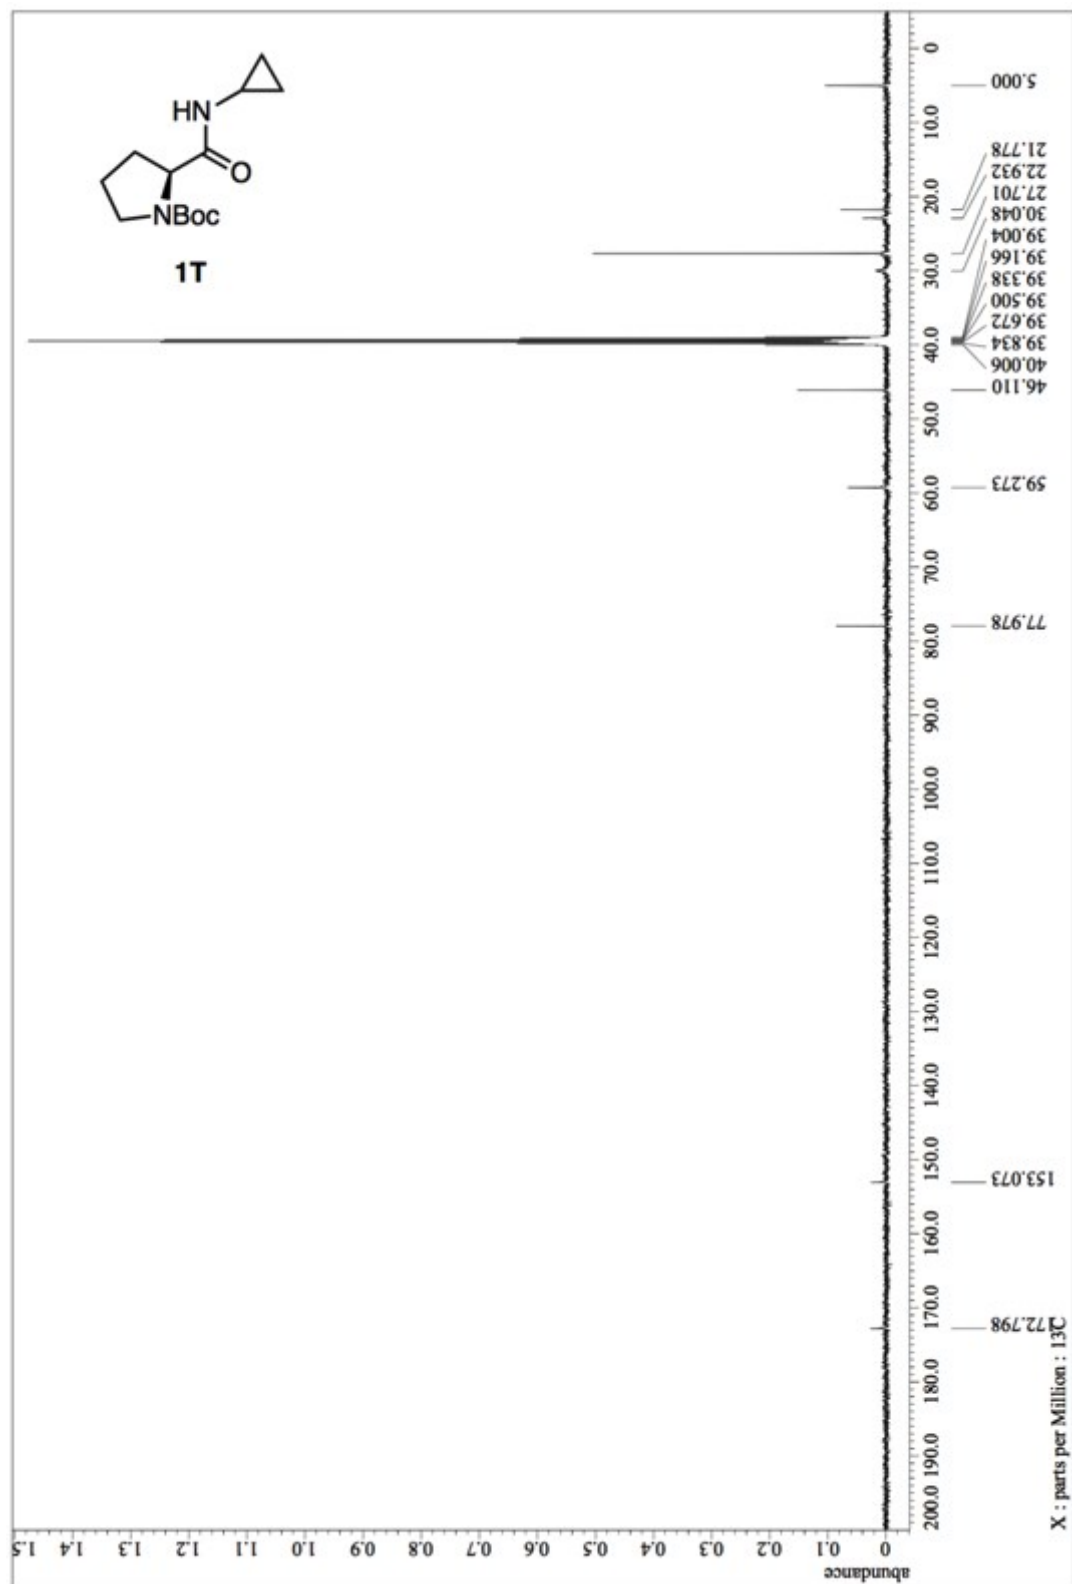

$^1\text{H}$  NMR (500MHz,  $\text{CDCl}_3$ ) of **1U**

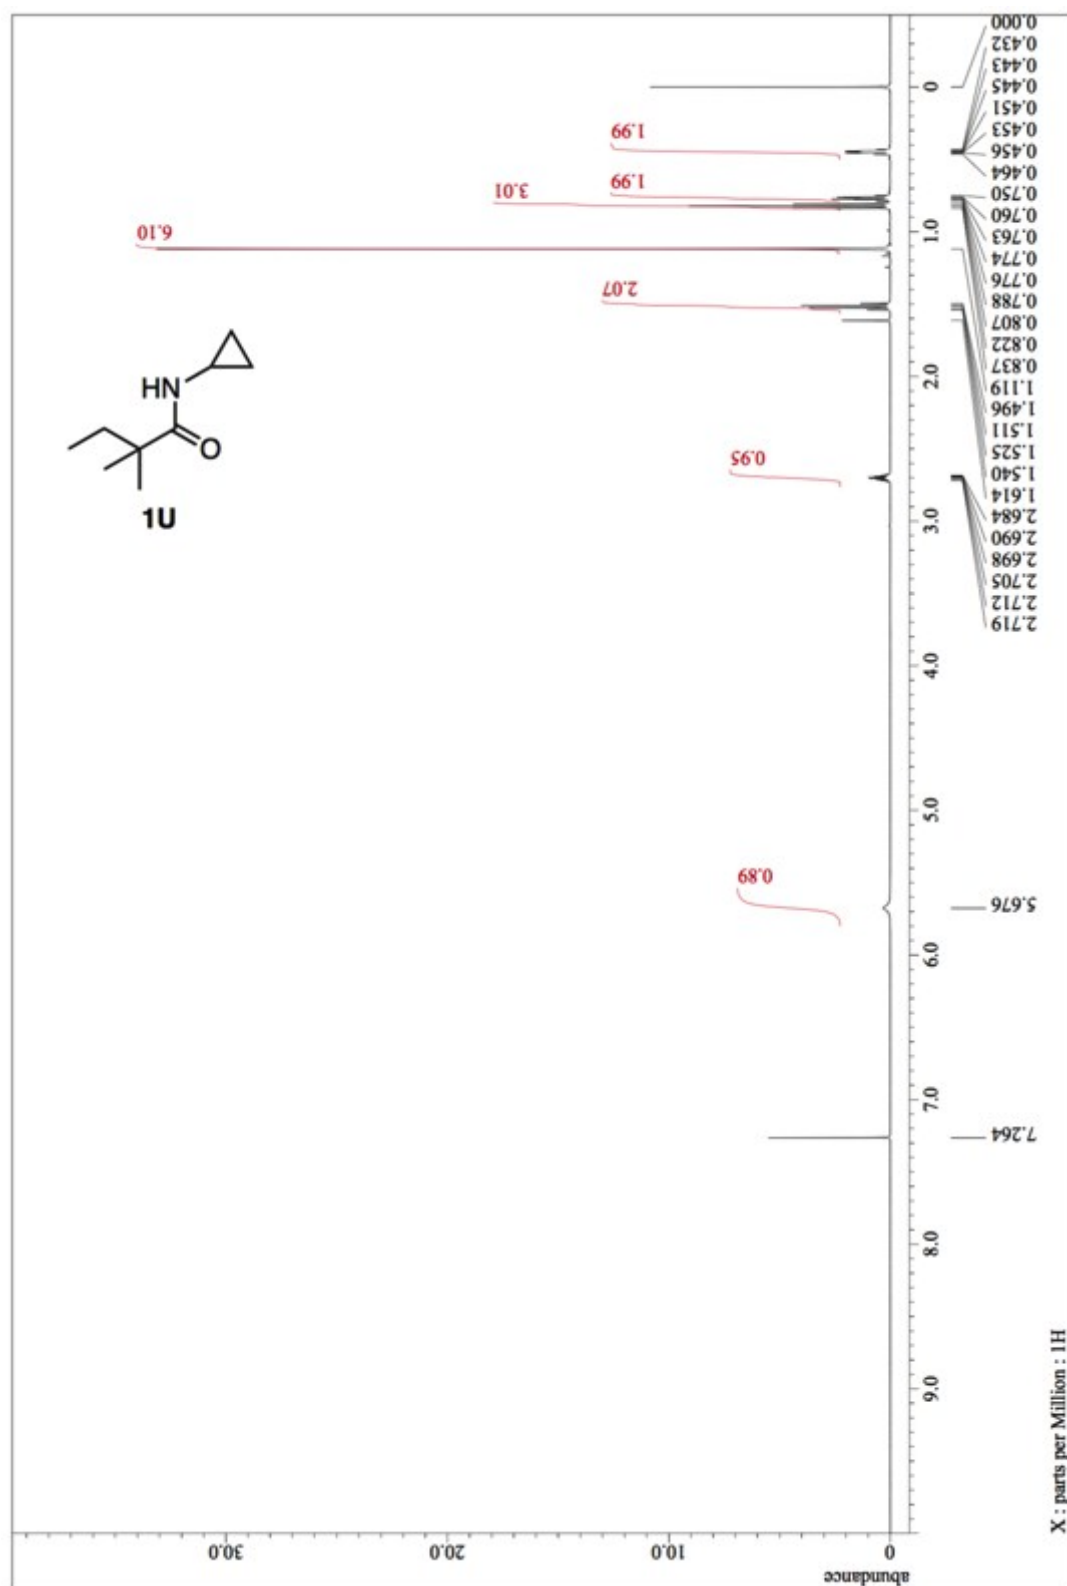

$^{13}\text{C}$  NMR (126MHz,  $\text{CDCl}_3$ ) of 1U

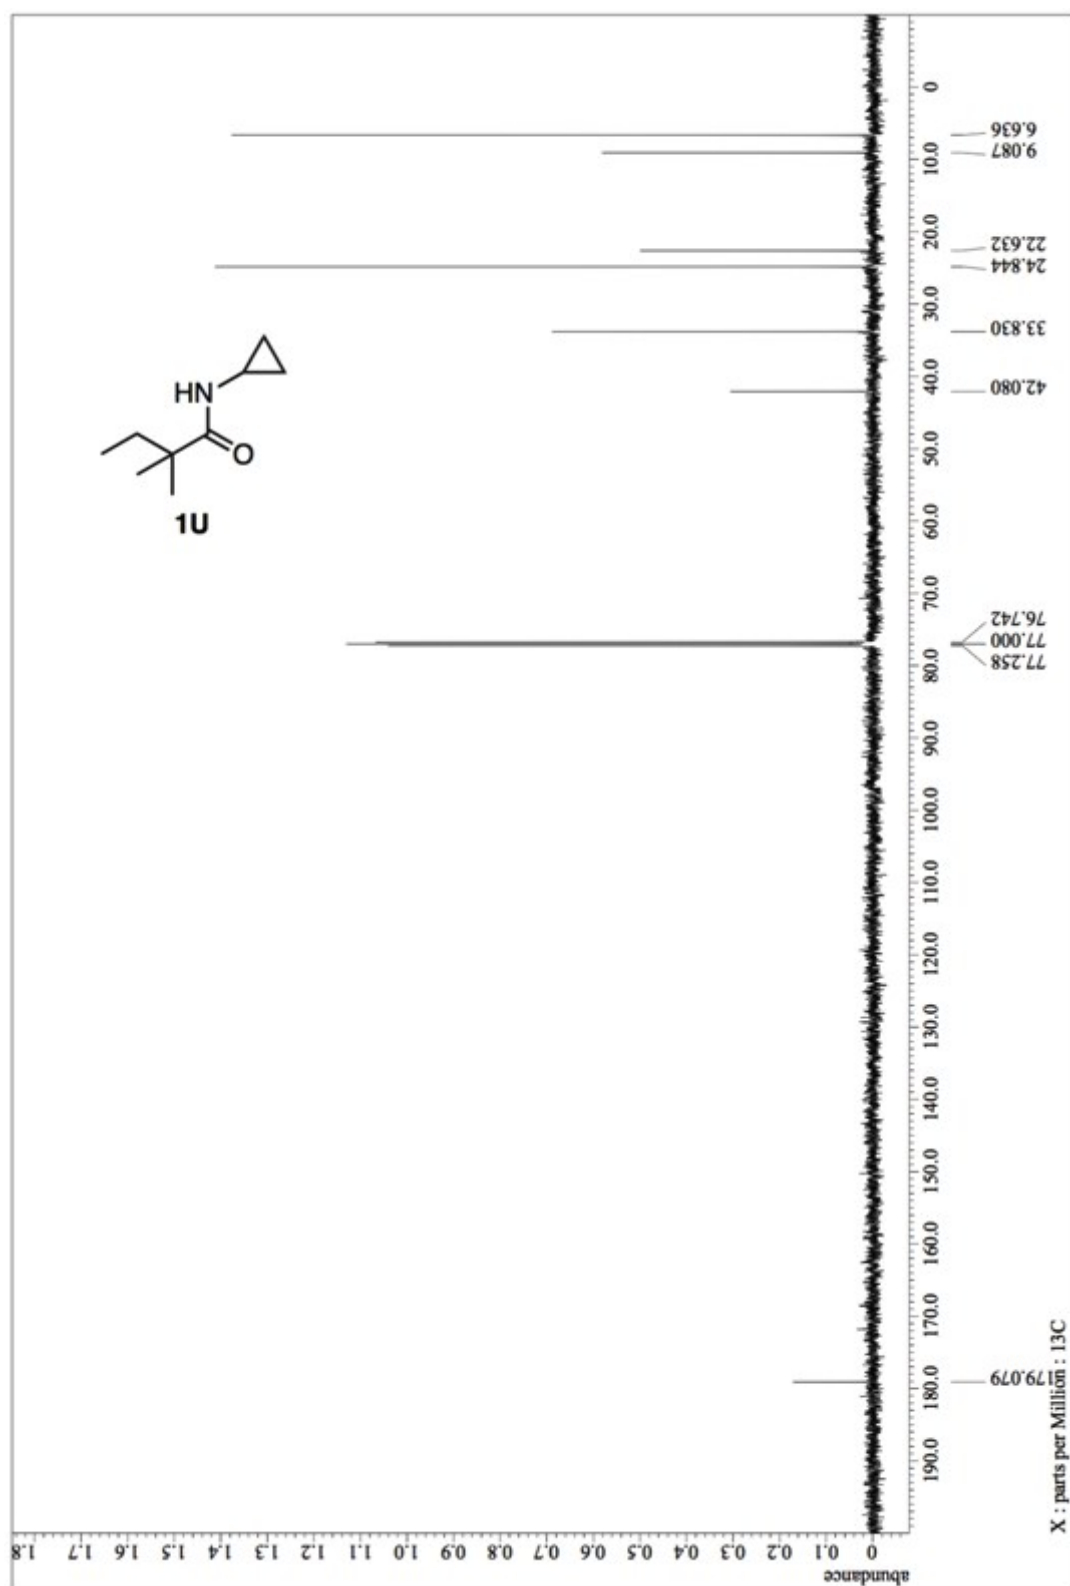

$^1\text{H}$  NMR (600MHz,  $\text{CDCl}_3$ ) of 1V

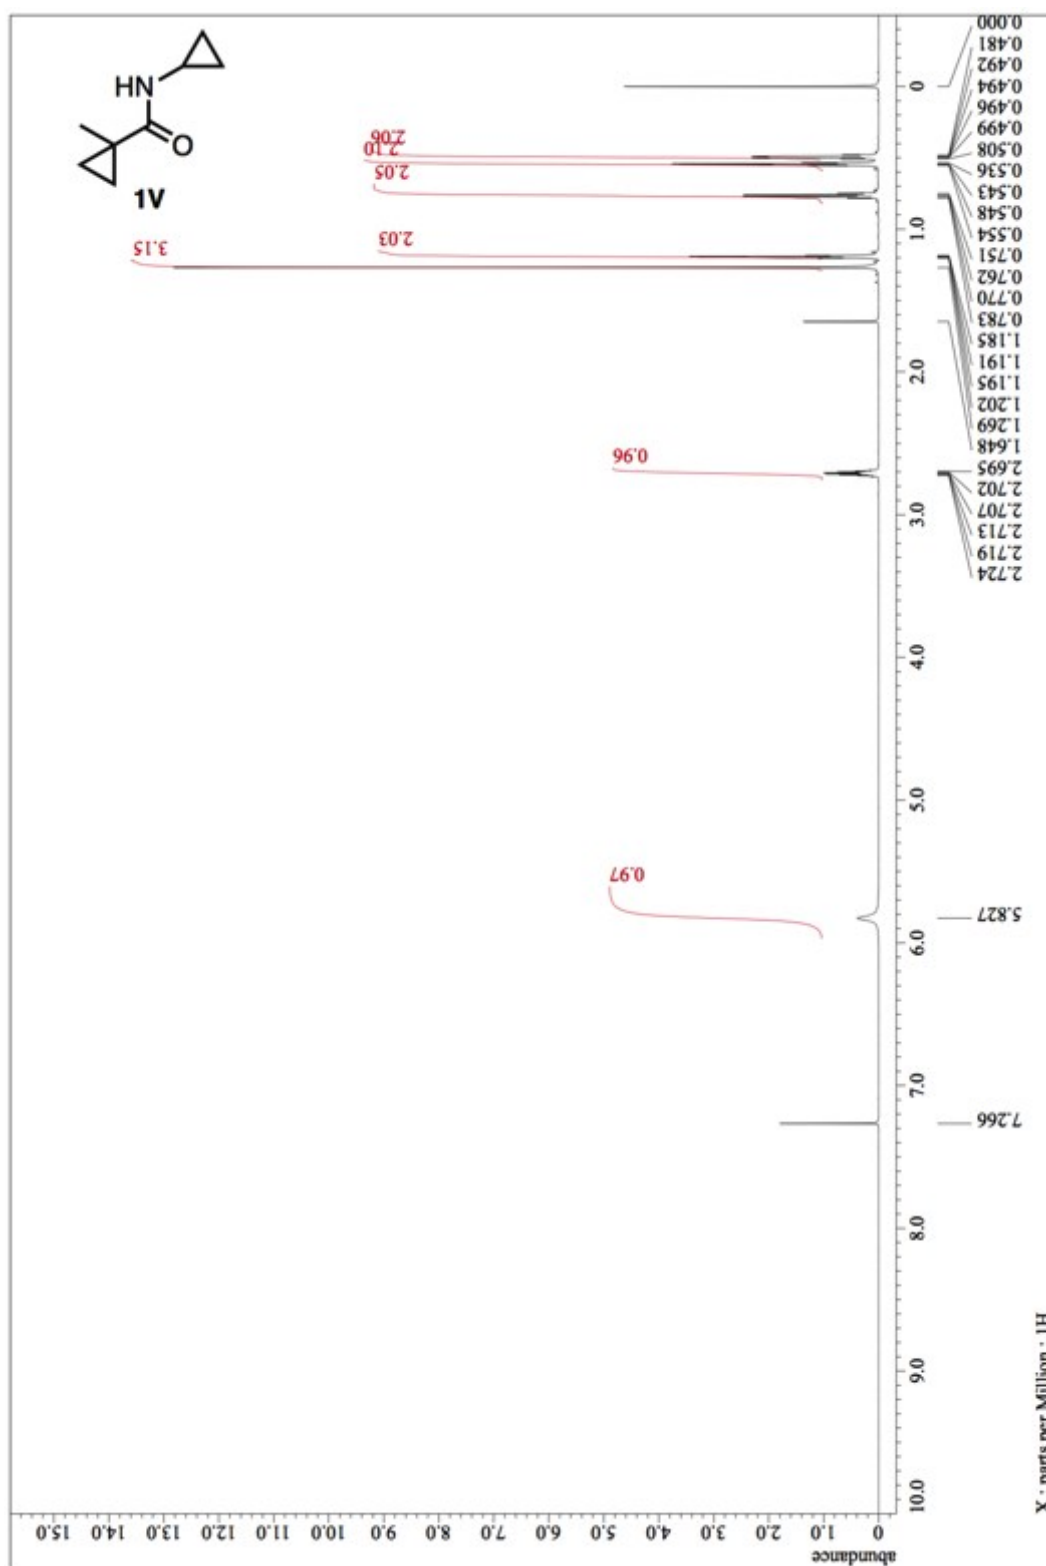

$^{13}\text{C}$  NMR (151MHz,  $\text{CDCl}_3$ ) of 1V

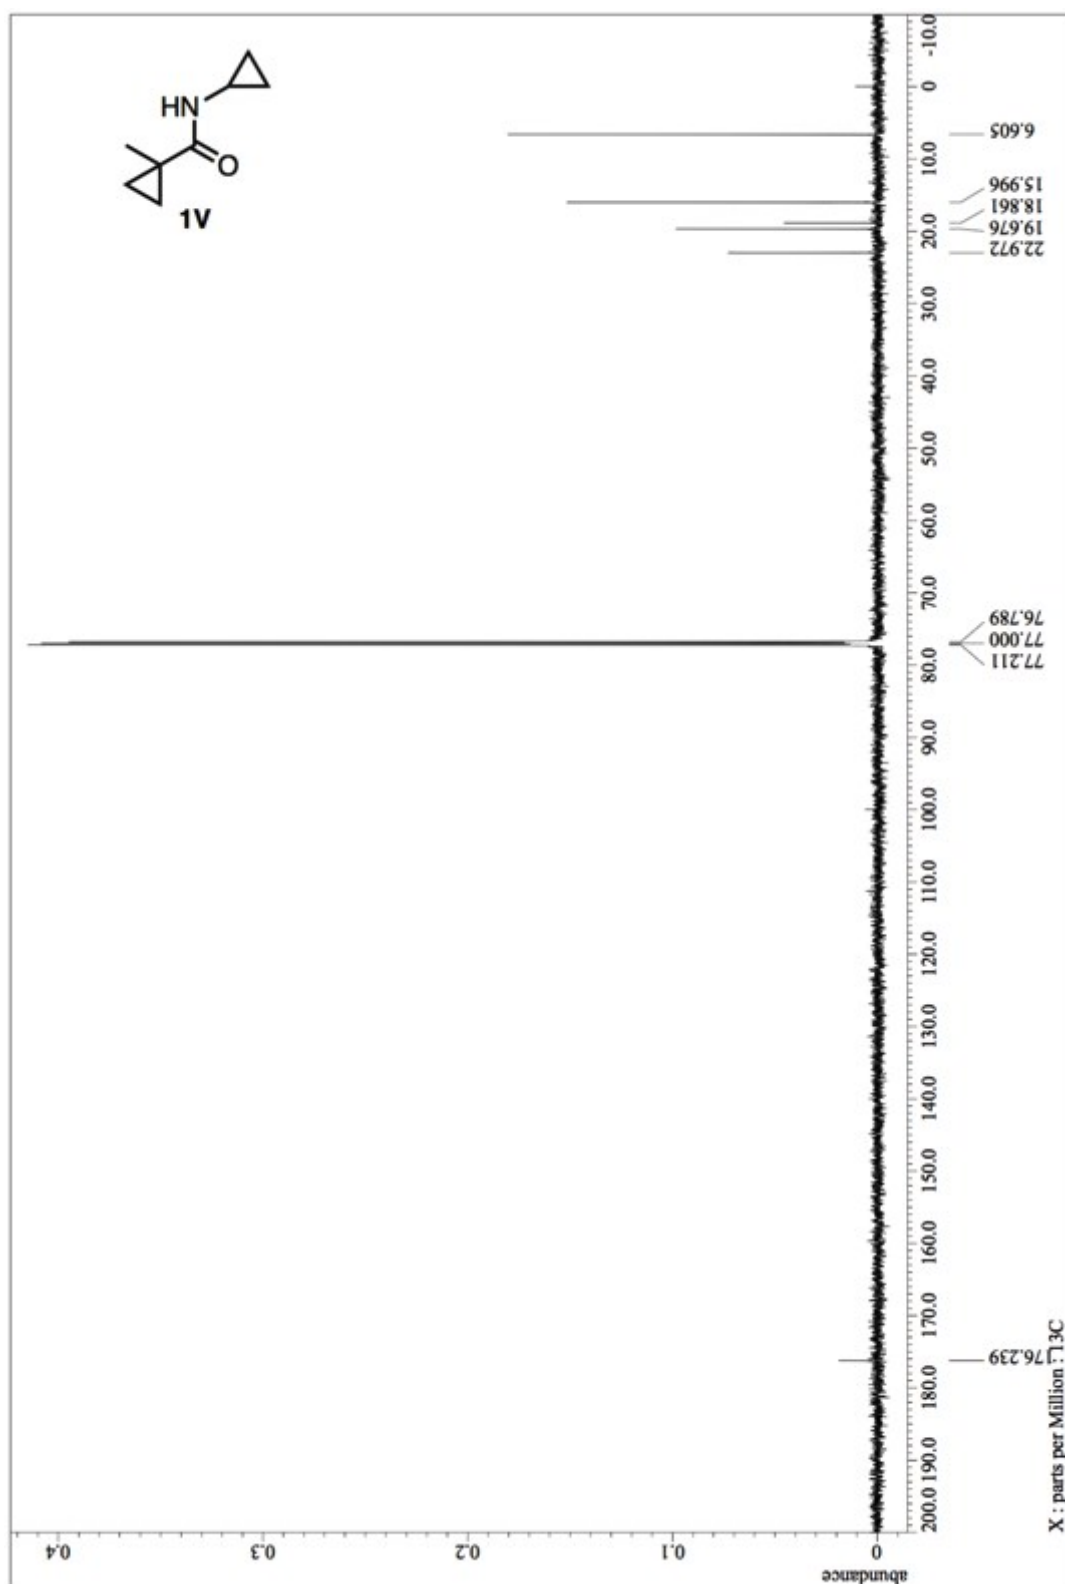



<sup>1</sup>H NMR (600MHz, CDCl<sub>3</sub>) of 4Aa

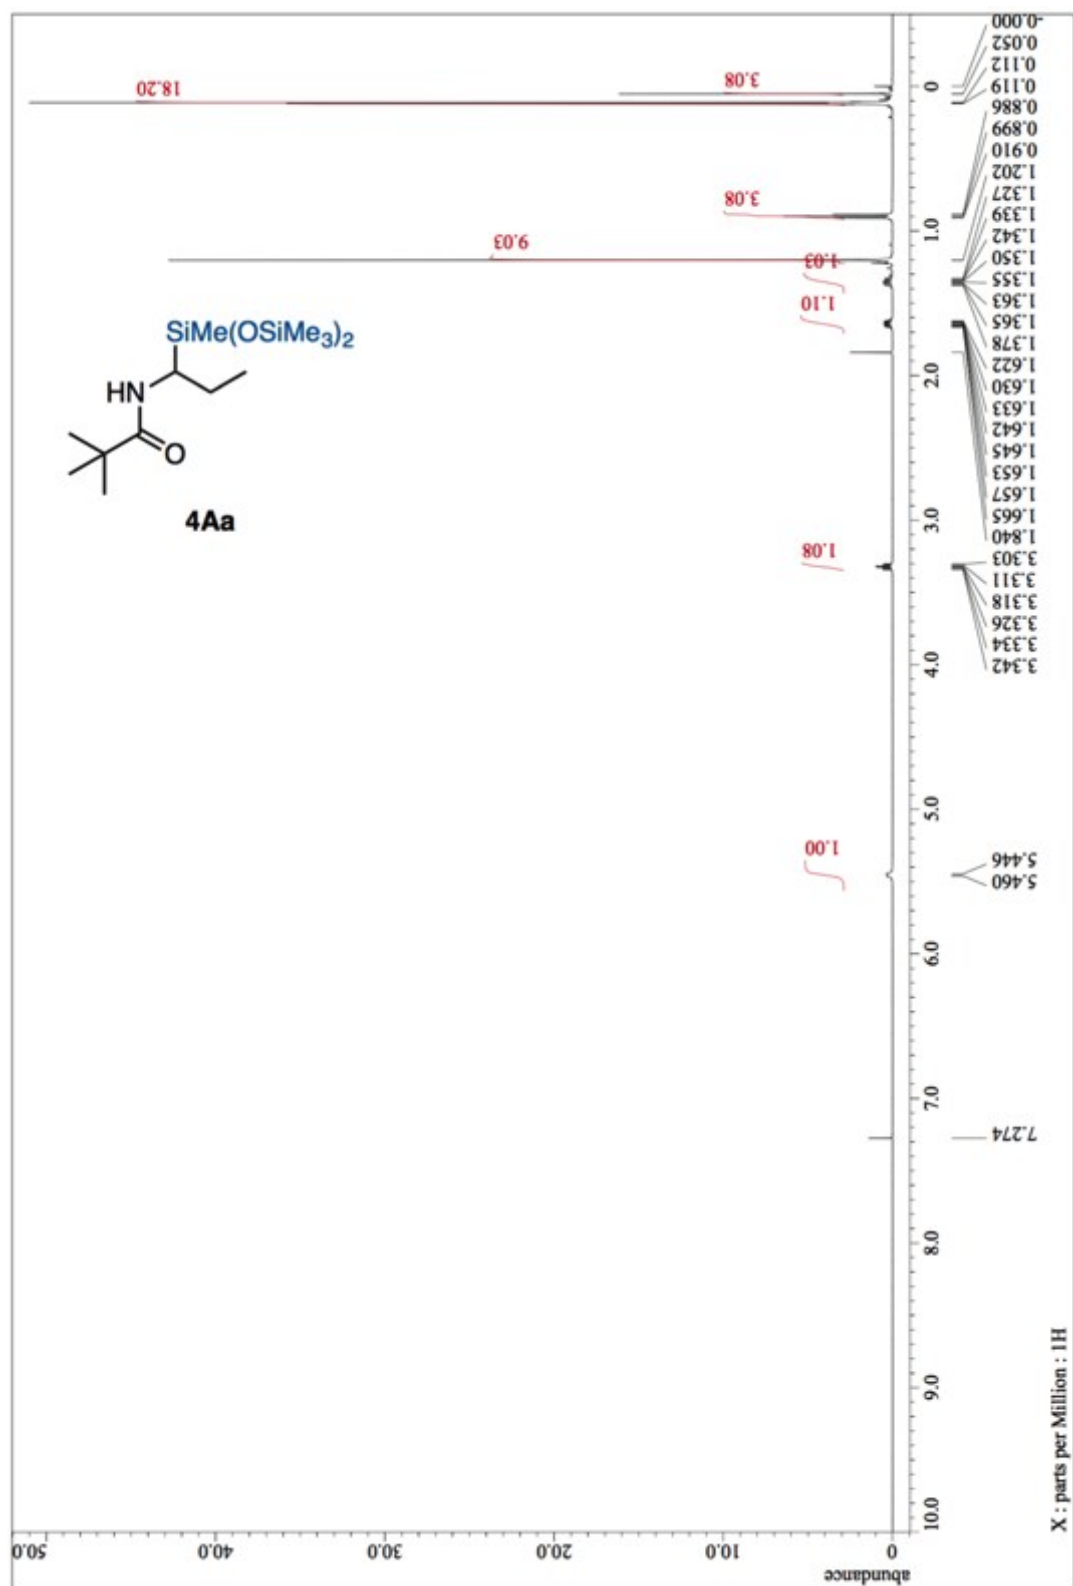

$^{13}\text{C}$  NMR (151MHz,  $\text{CDCl}_3$ ) of 4Aa

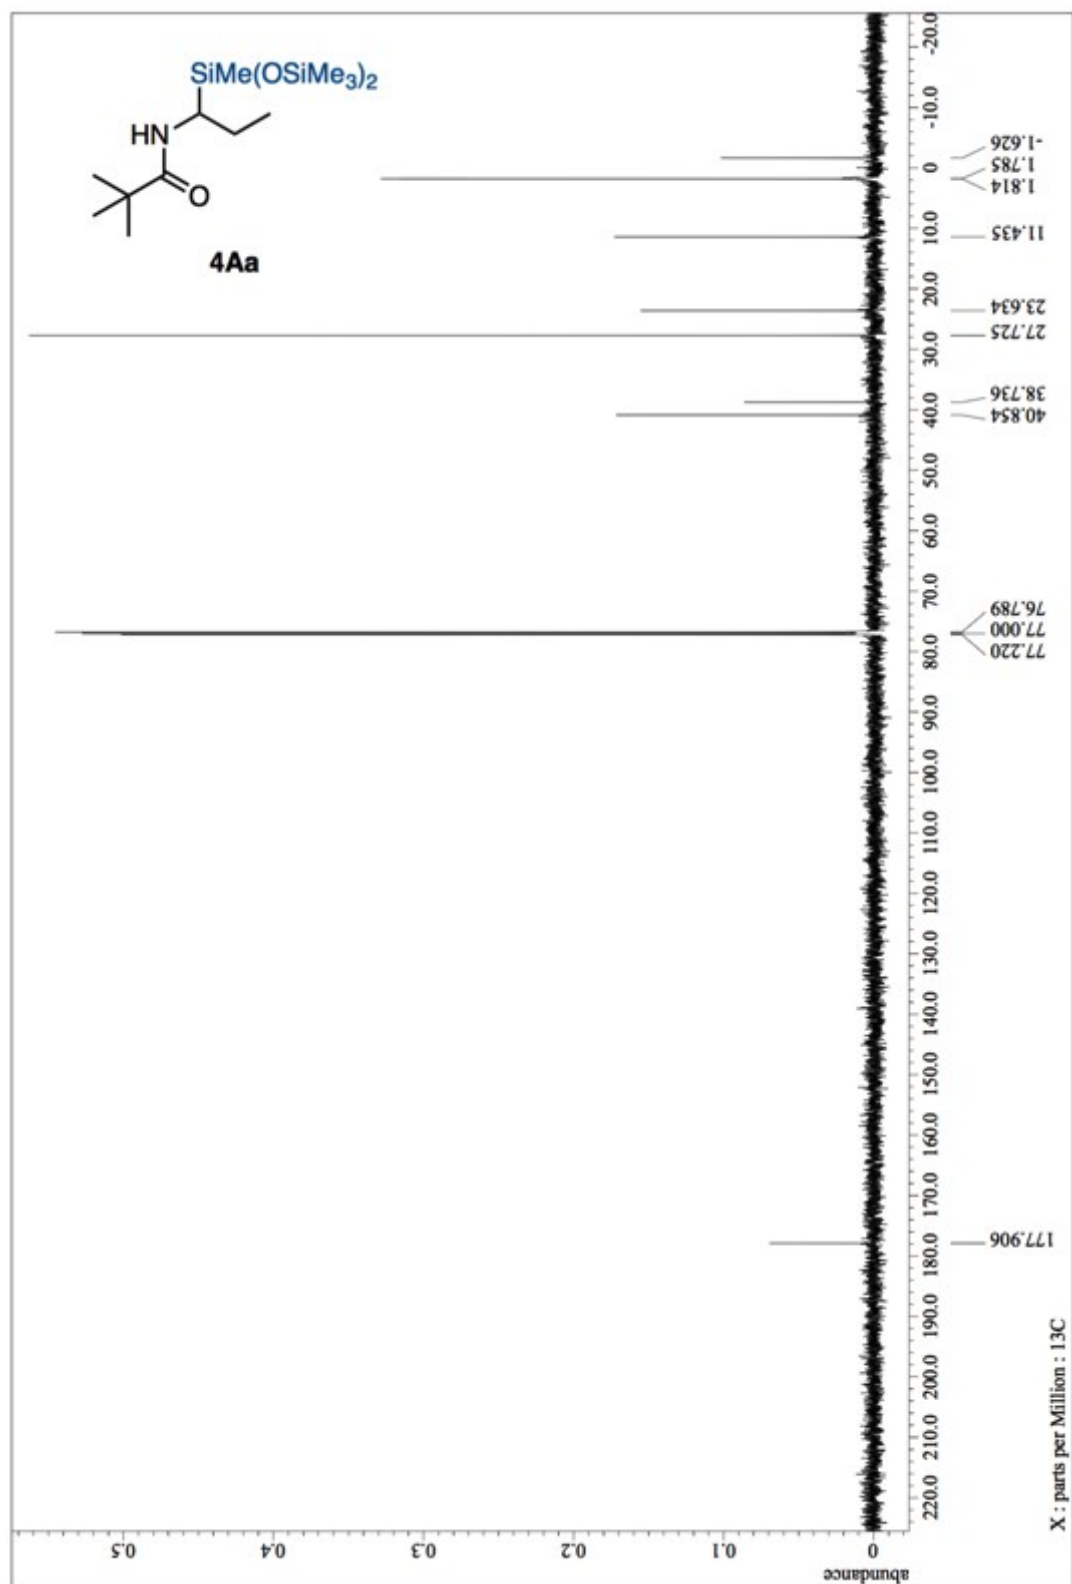

<sup>1</sup>H NMR (400MHz, CDCl<sub>3</sub>) of 4Ba

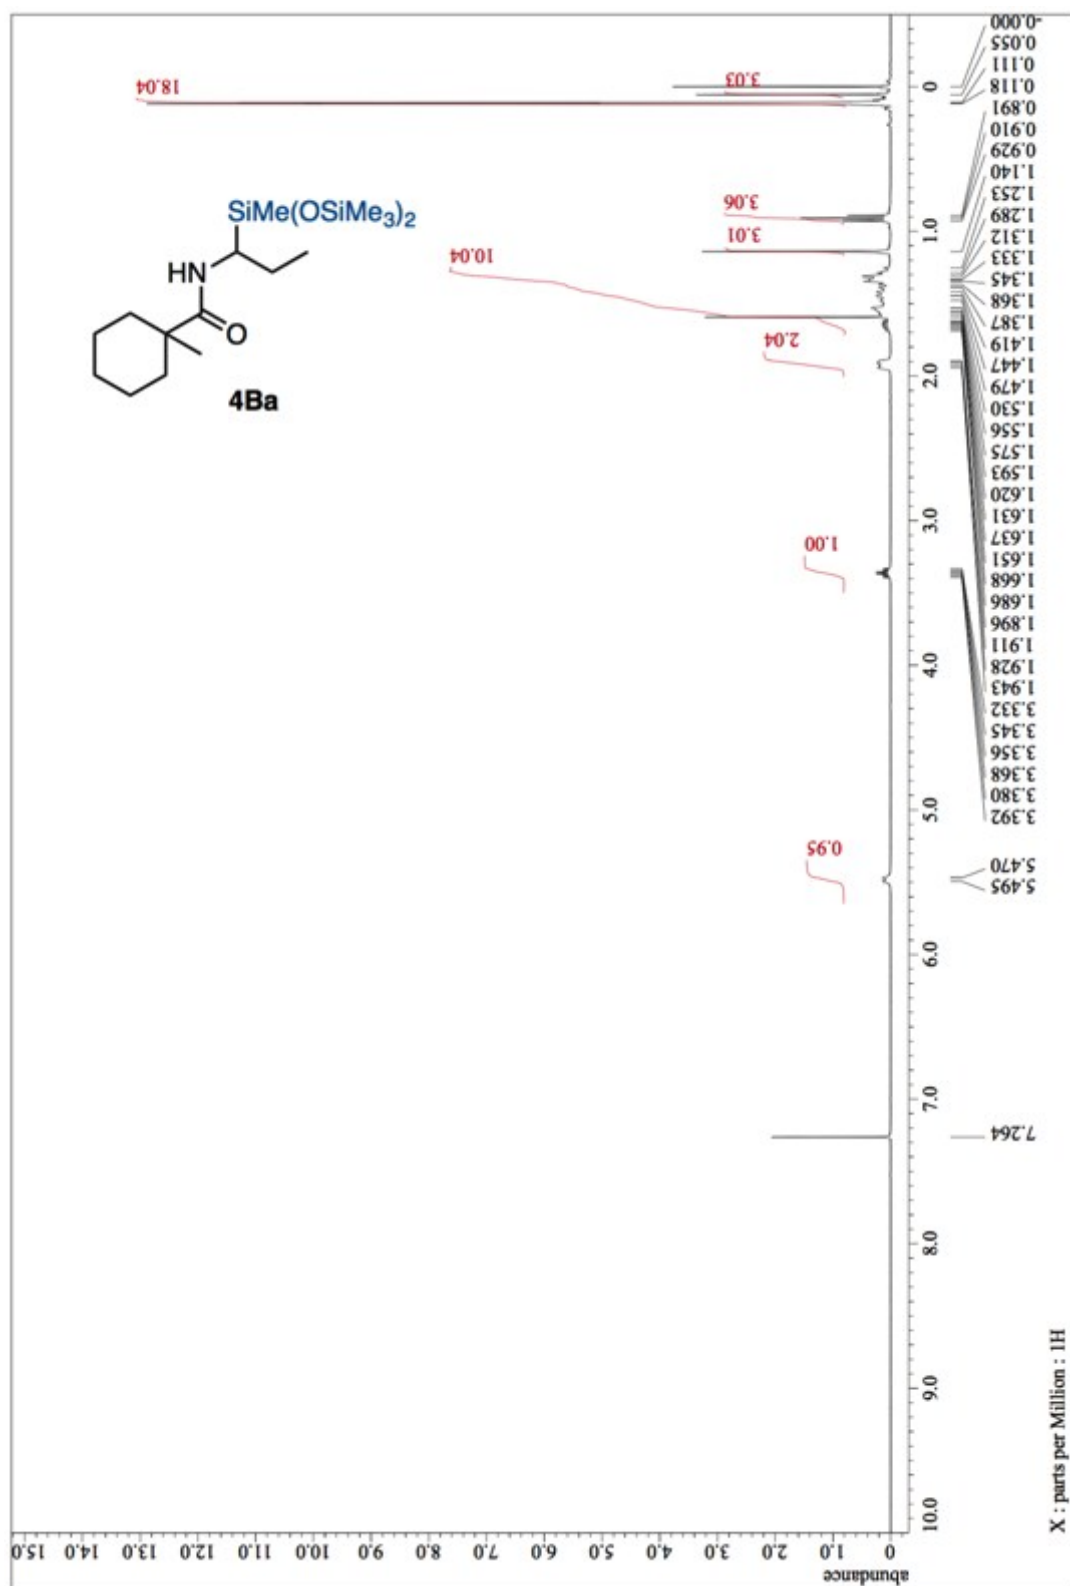

$^{13}\text{C}$  NMR (151MHz,  $\text{CDCl}_3$ ) of 4Ba

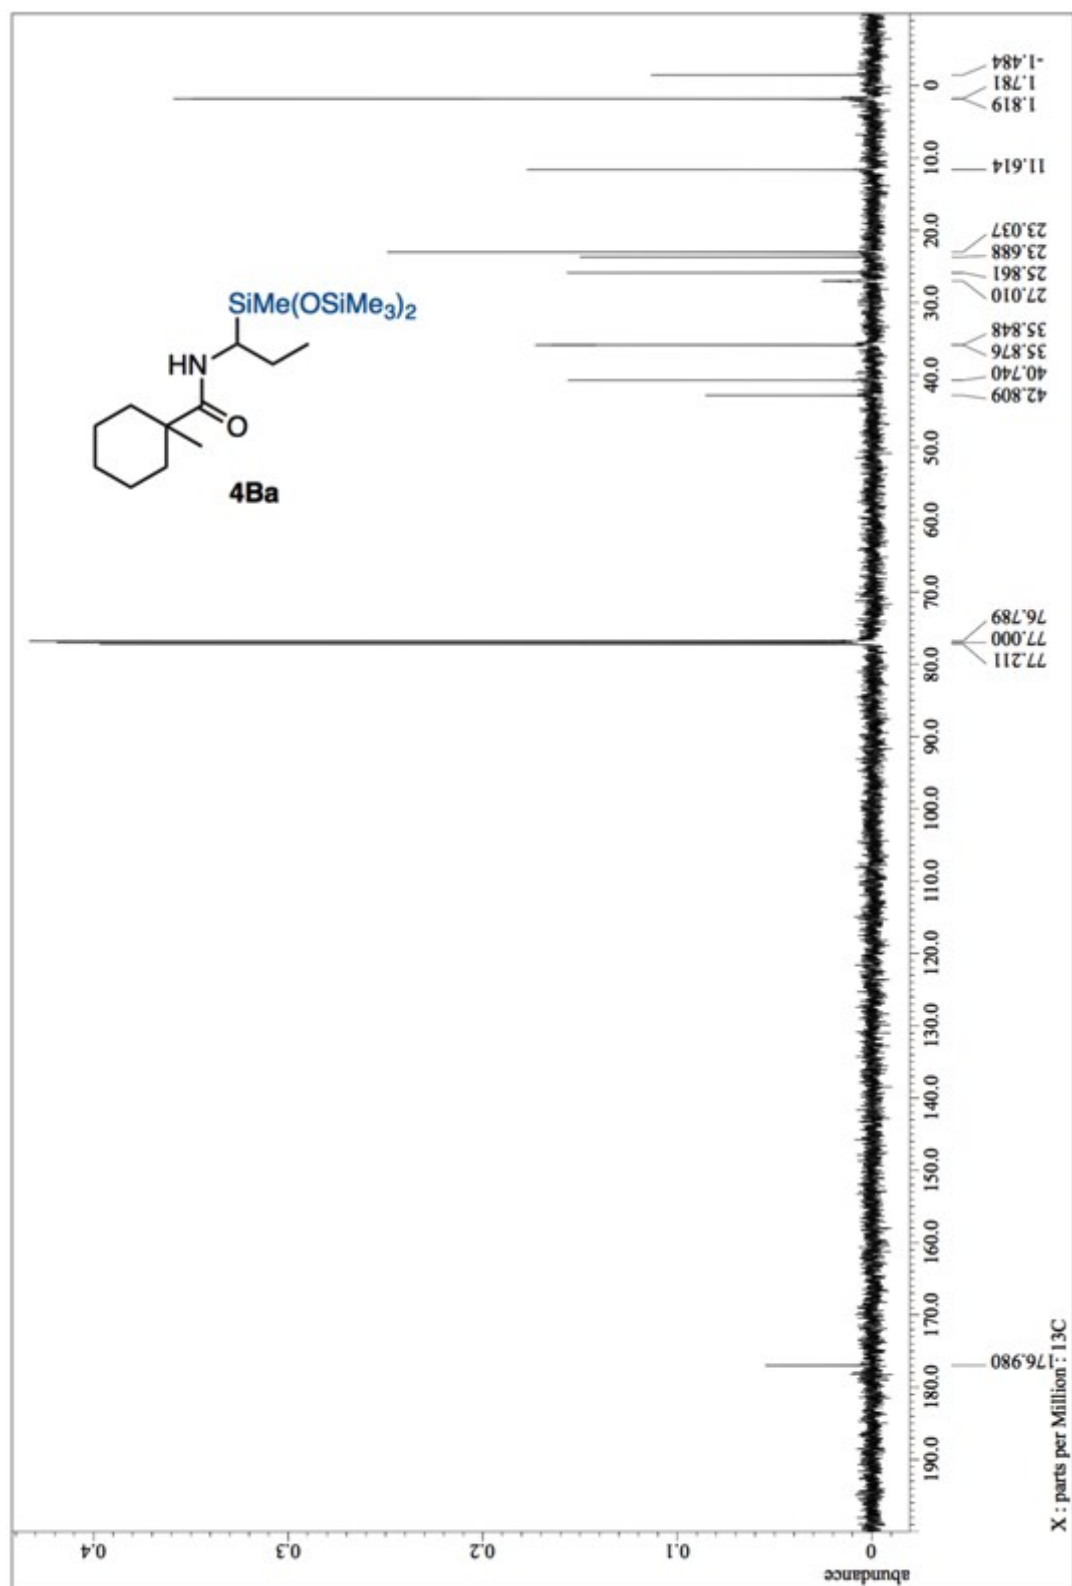

$^1\text{H}$  NMR (600MHz,  $\text{CDCl}_3$ ) of 4Ca

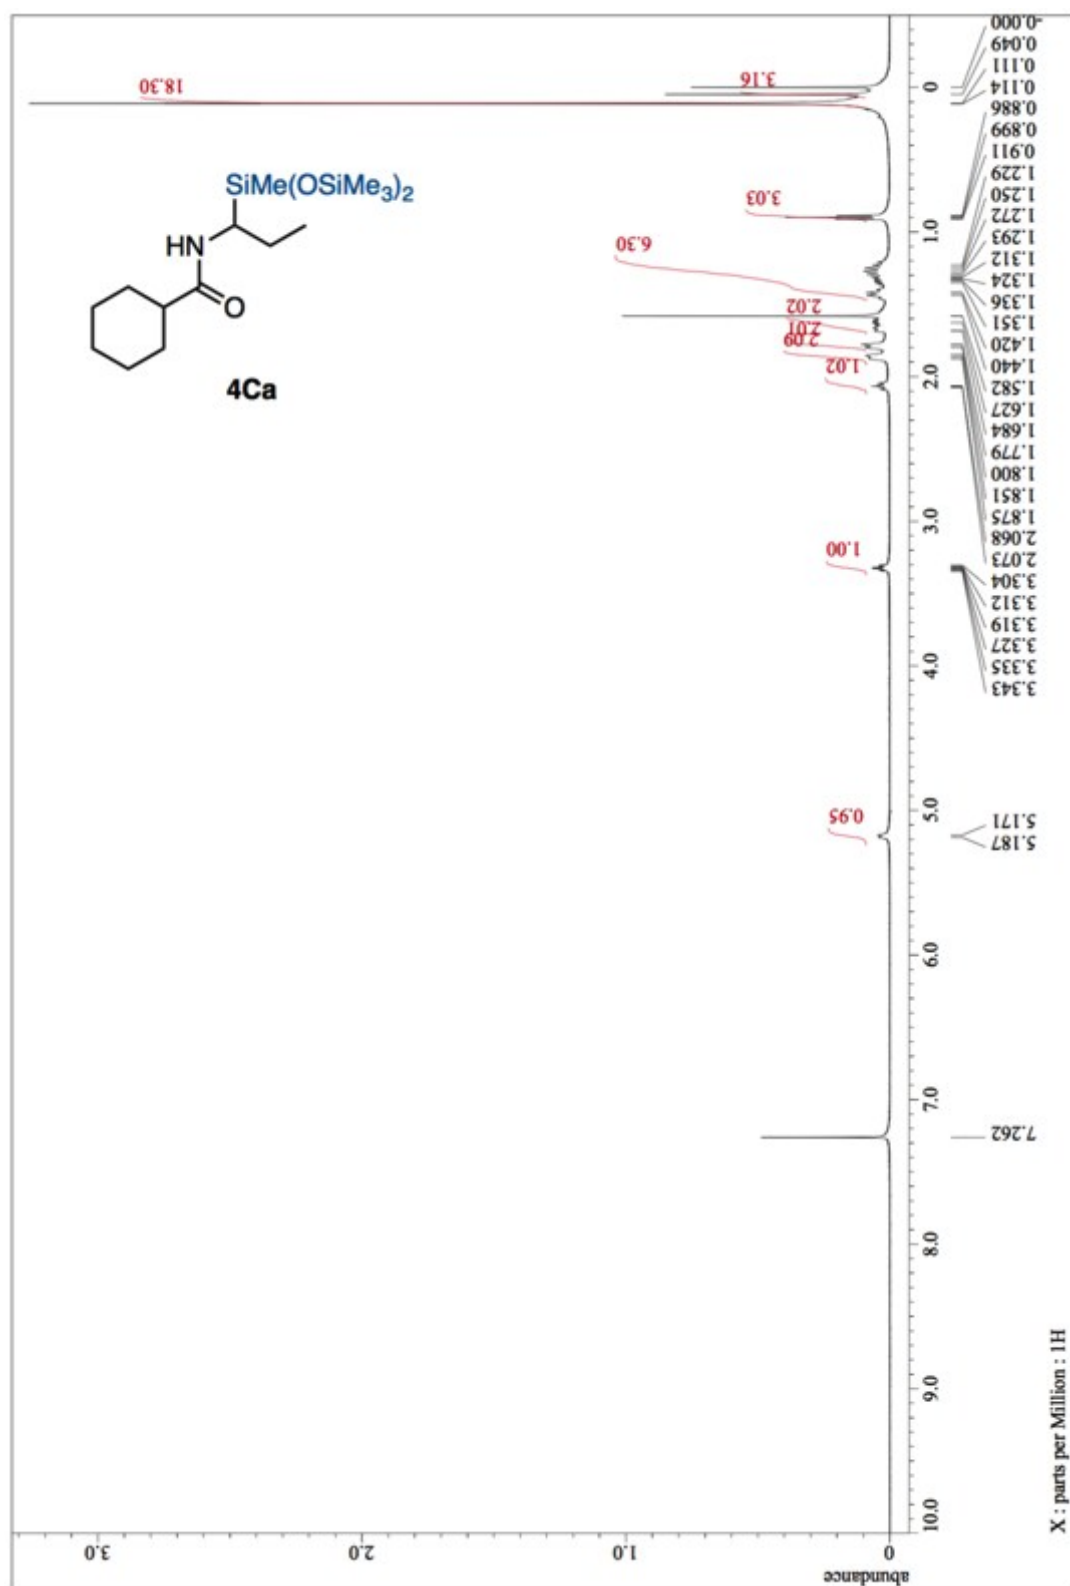

$^{13}\text{C}$  NMR (151MHz,  $\text{CDCl}_3$ ) of 4Ca

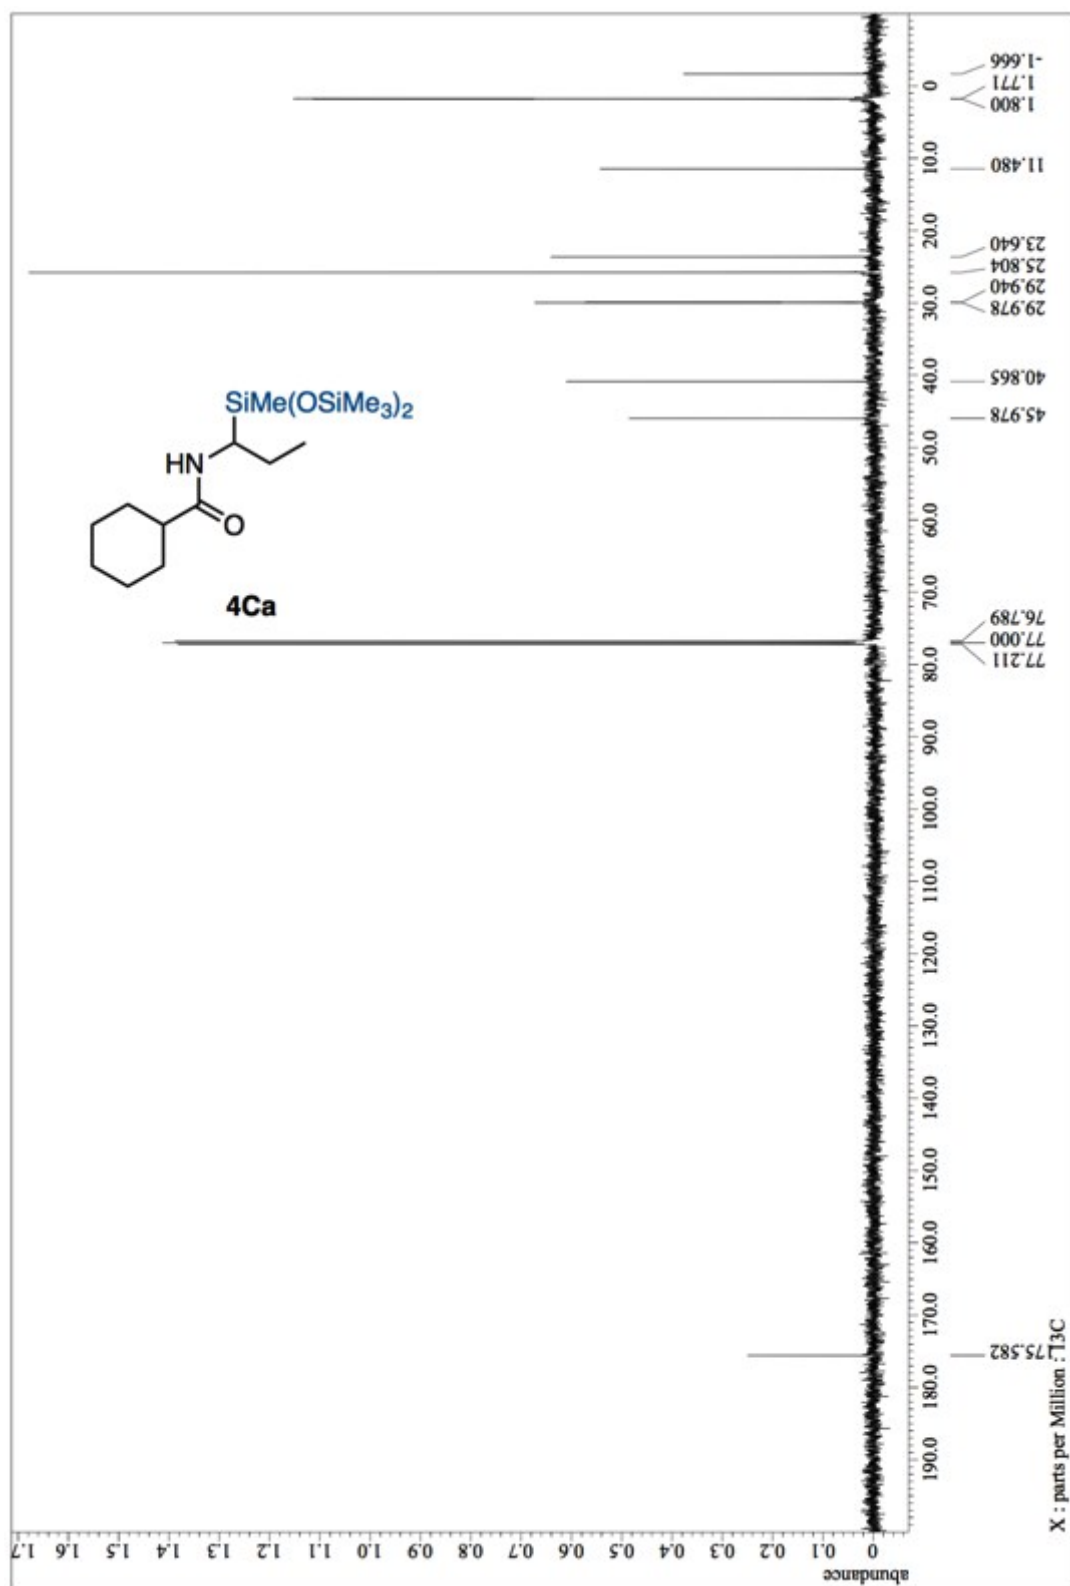

<sup>1</sup>H NMR (600MHz, CDCl<sub>3</sub>) of 4Da

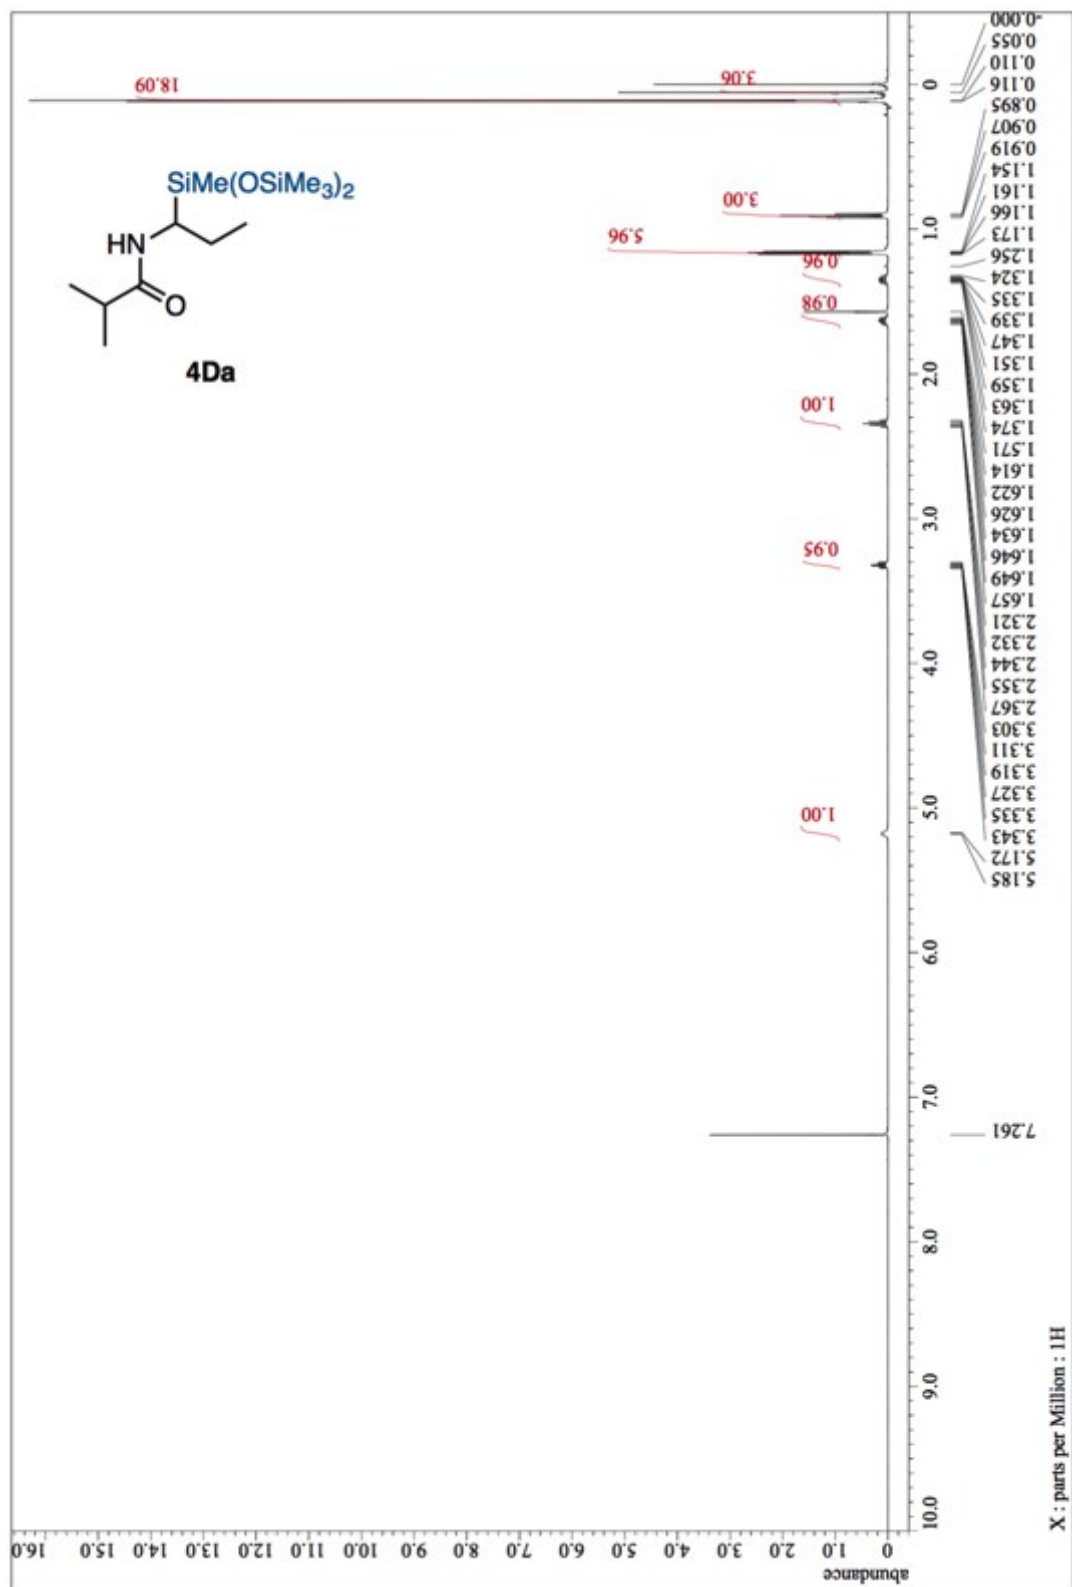

$^{13}\text{C}$  NMR (151MHz,  $\text{CDCl}_3$ ) of 4Da

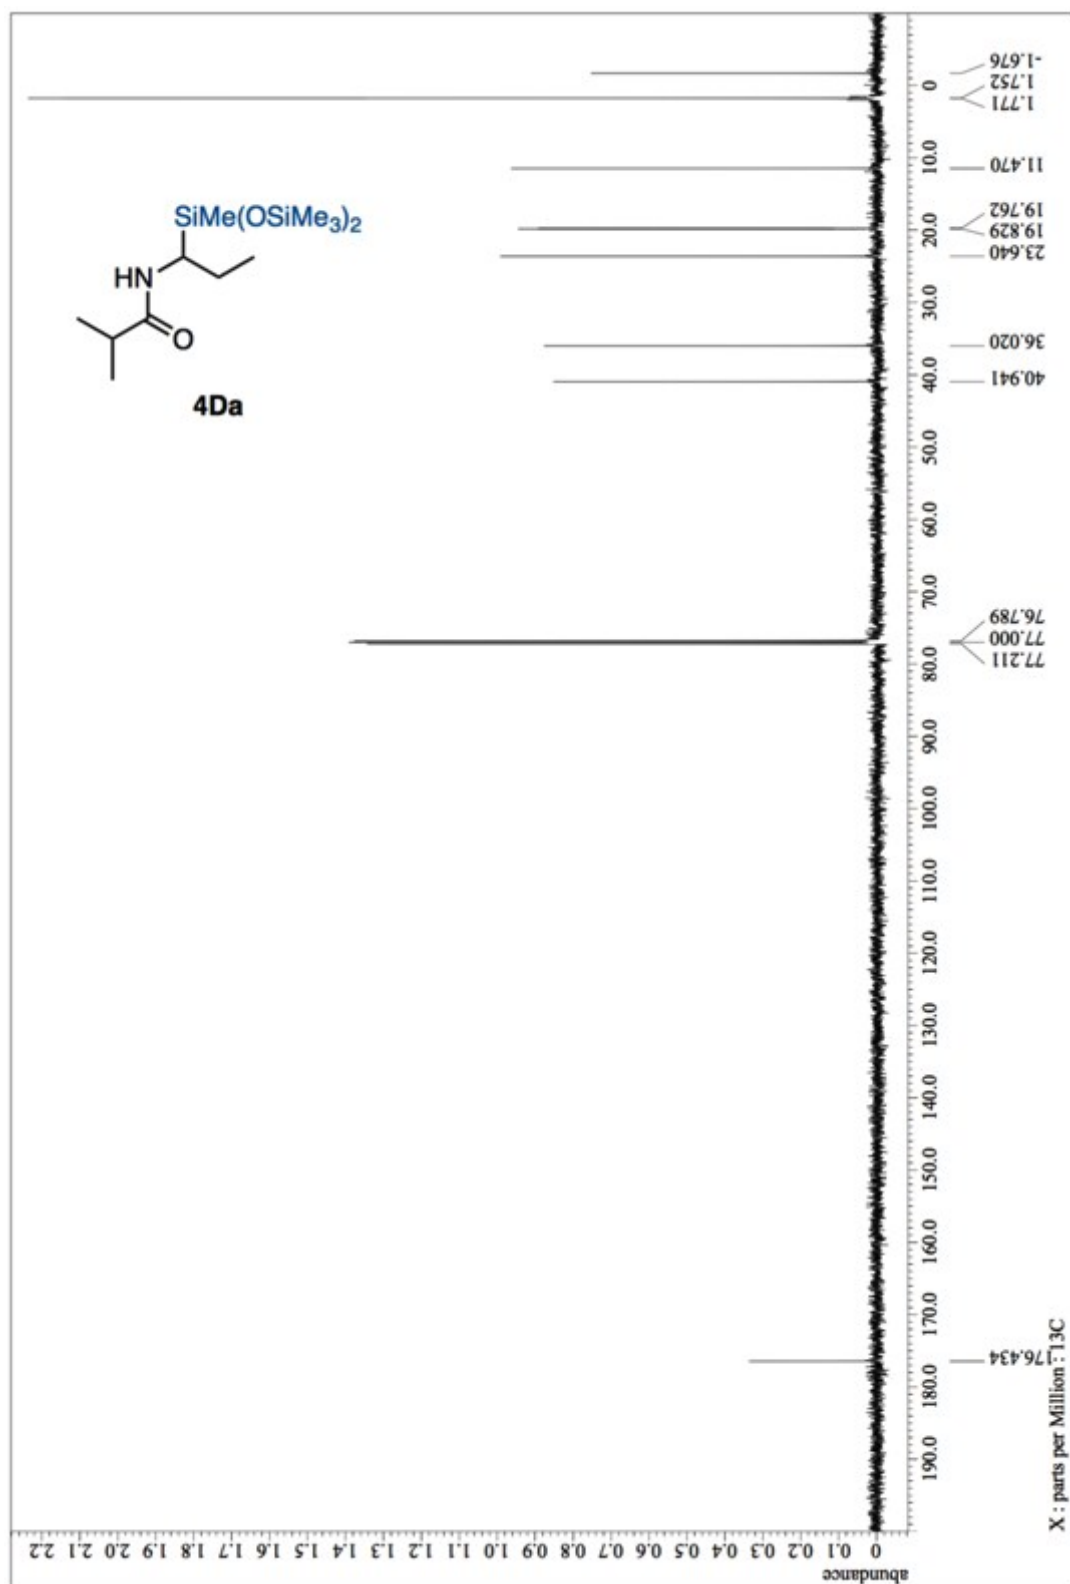



<sup>1</sup>H NMR (400MHz, CDCl<sub>3</sub>) of 4Ea

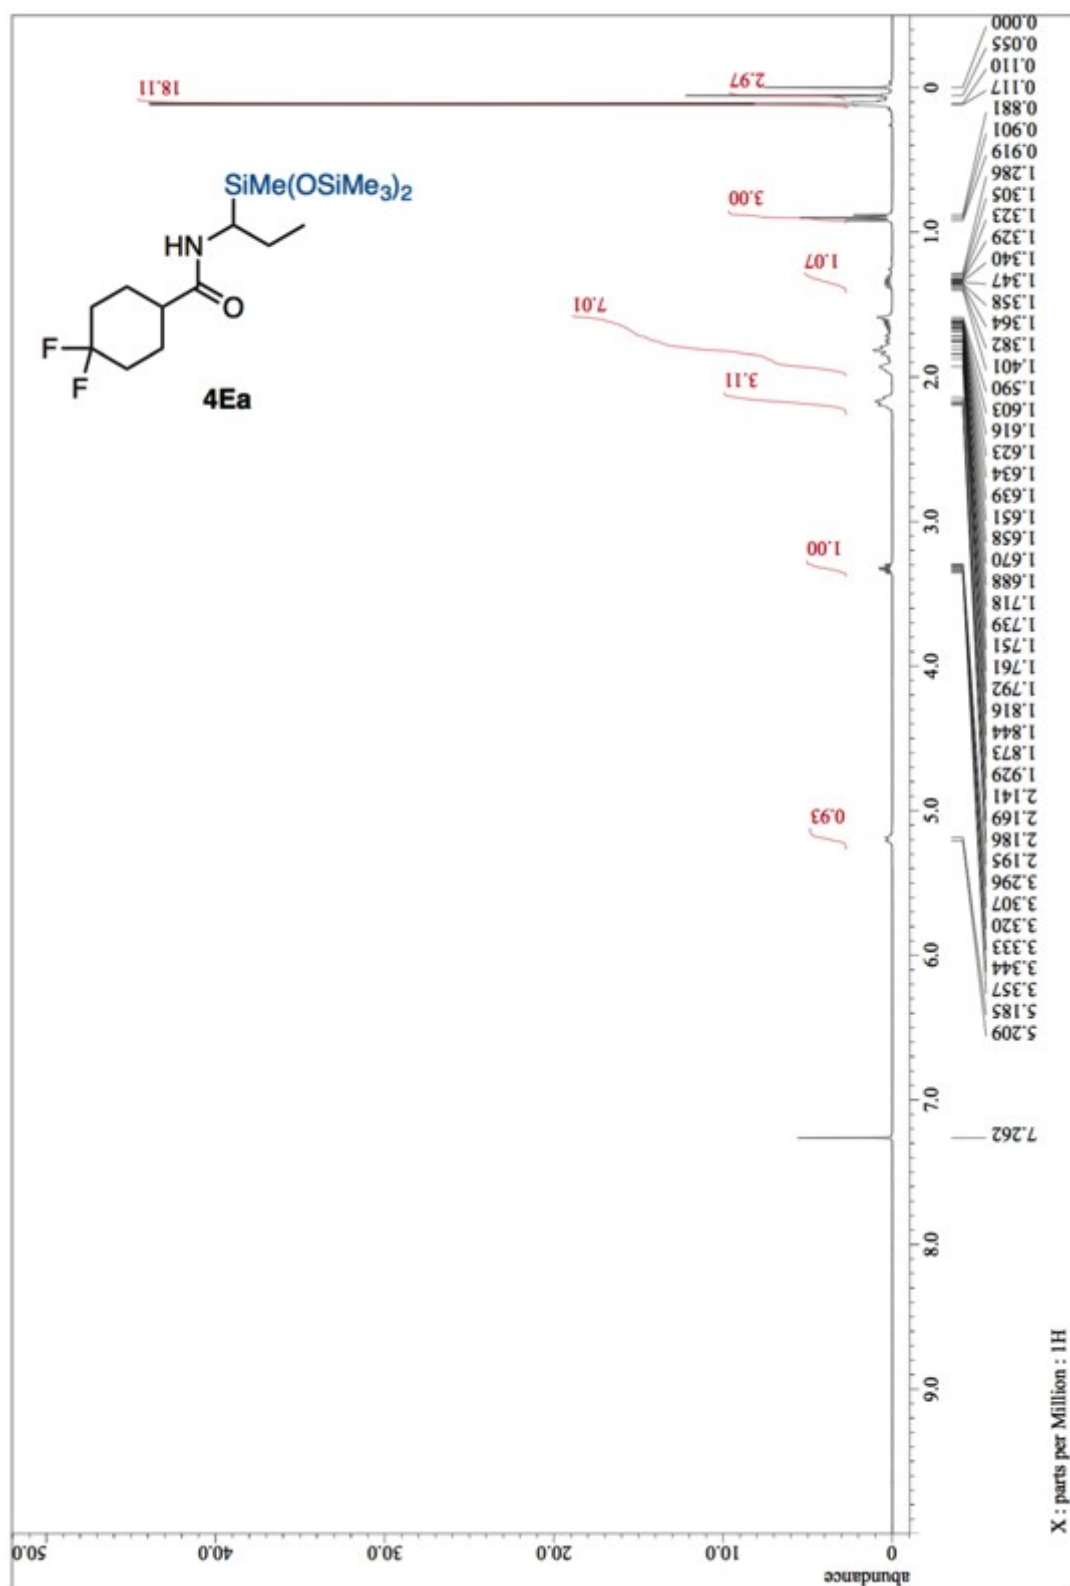

$^{13}\text{C}$  NMR (101MHz,  $\text{CDCl}_3$ ) of 4Ea

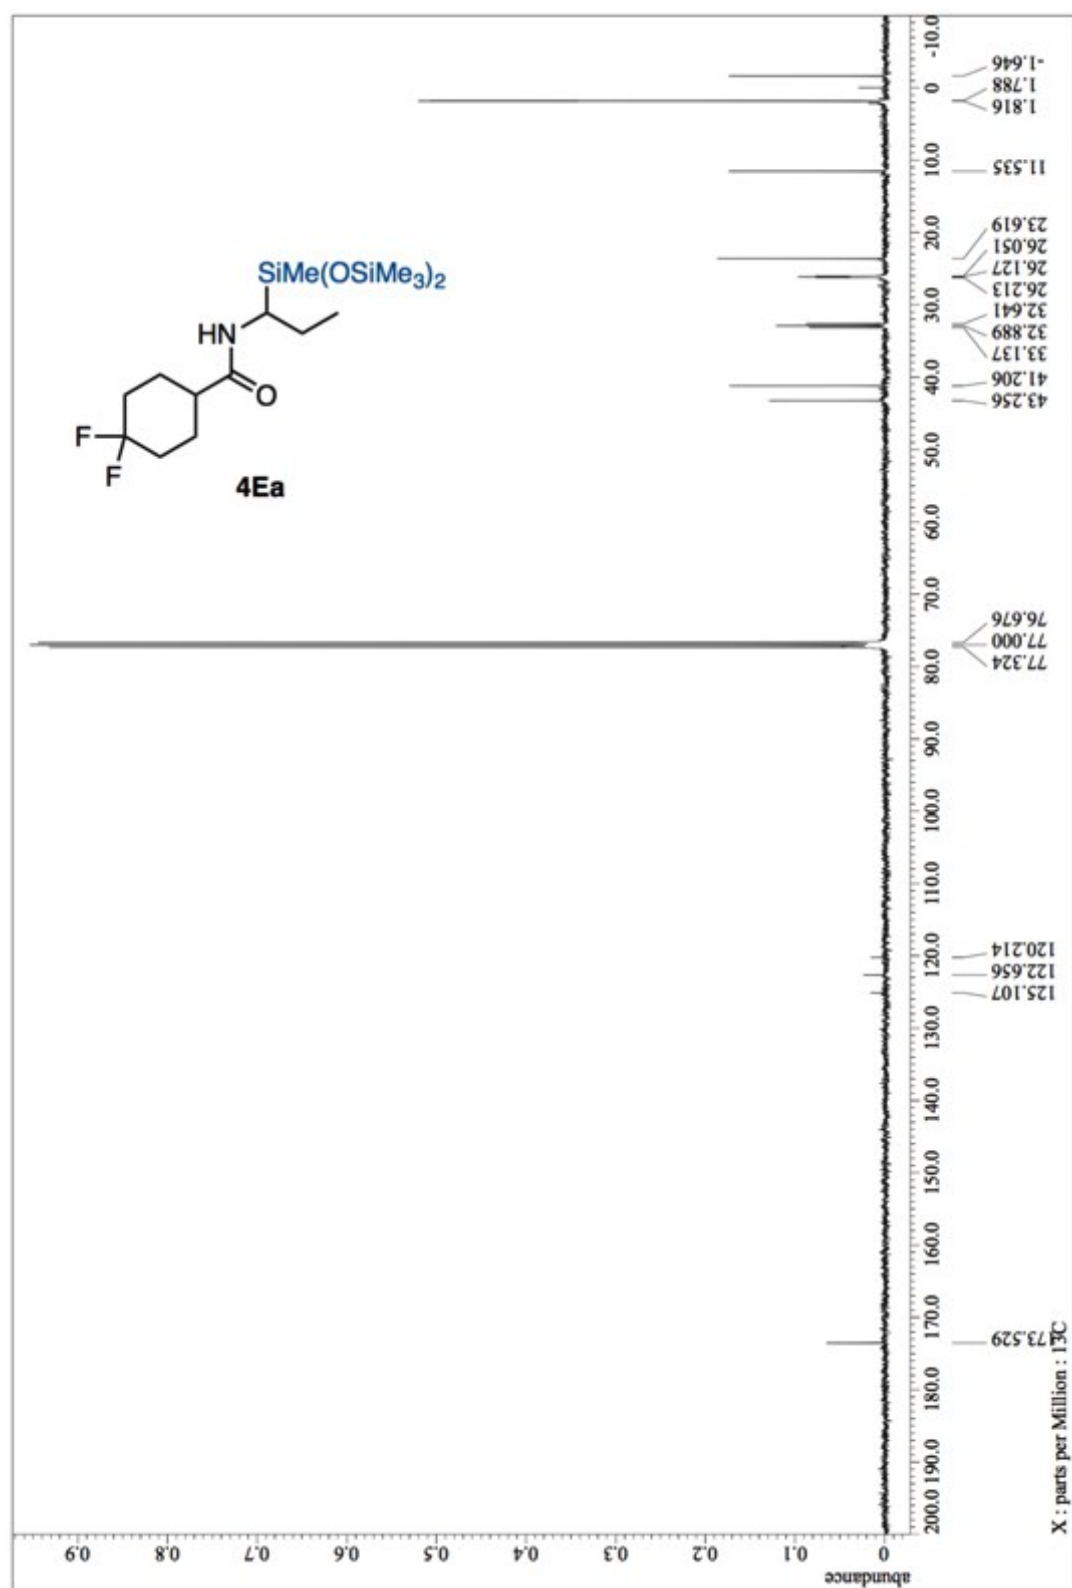

$^1\text{H}$  NMR (600MHz,  $\text{CDCl}_3$ ) of 4Fa

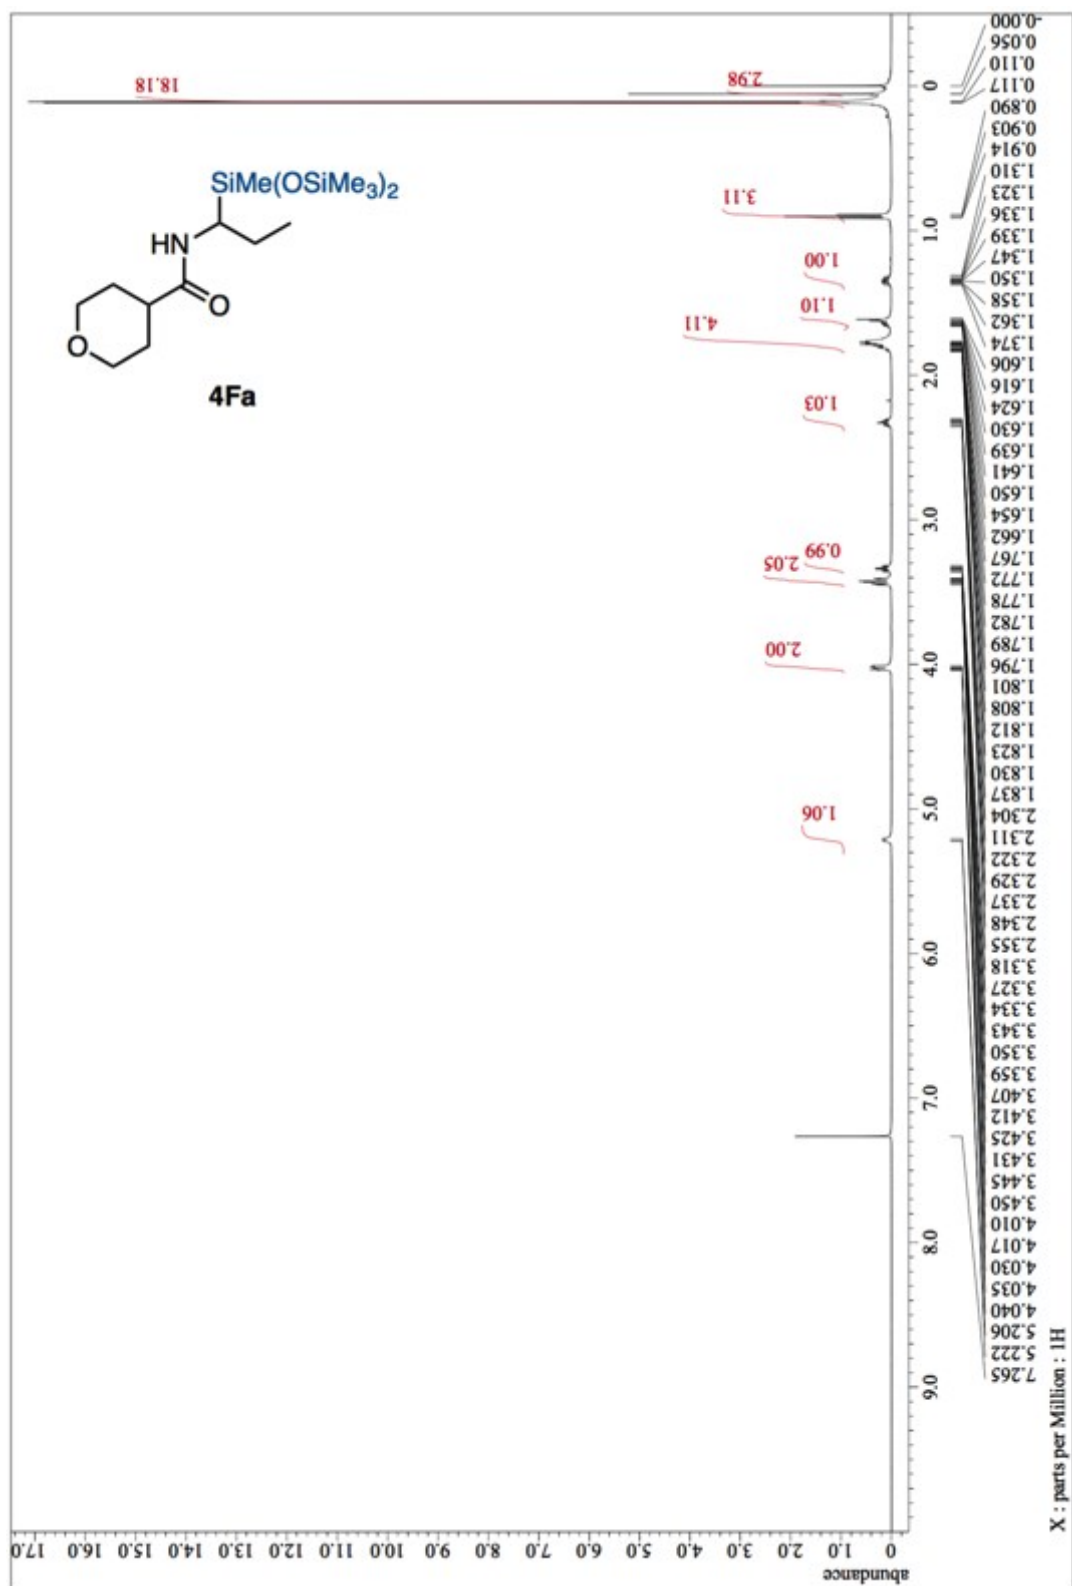

$^{13}\text{C}$  NMR (151MHz,  $\text{CDCl}_3$ ) of 4Fa

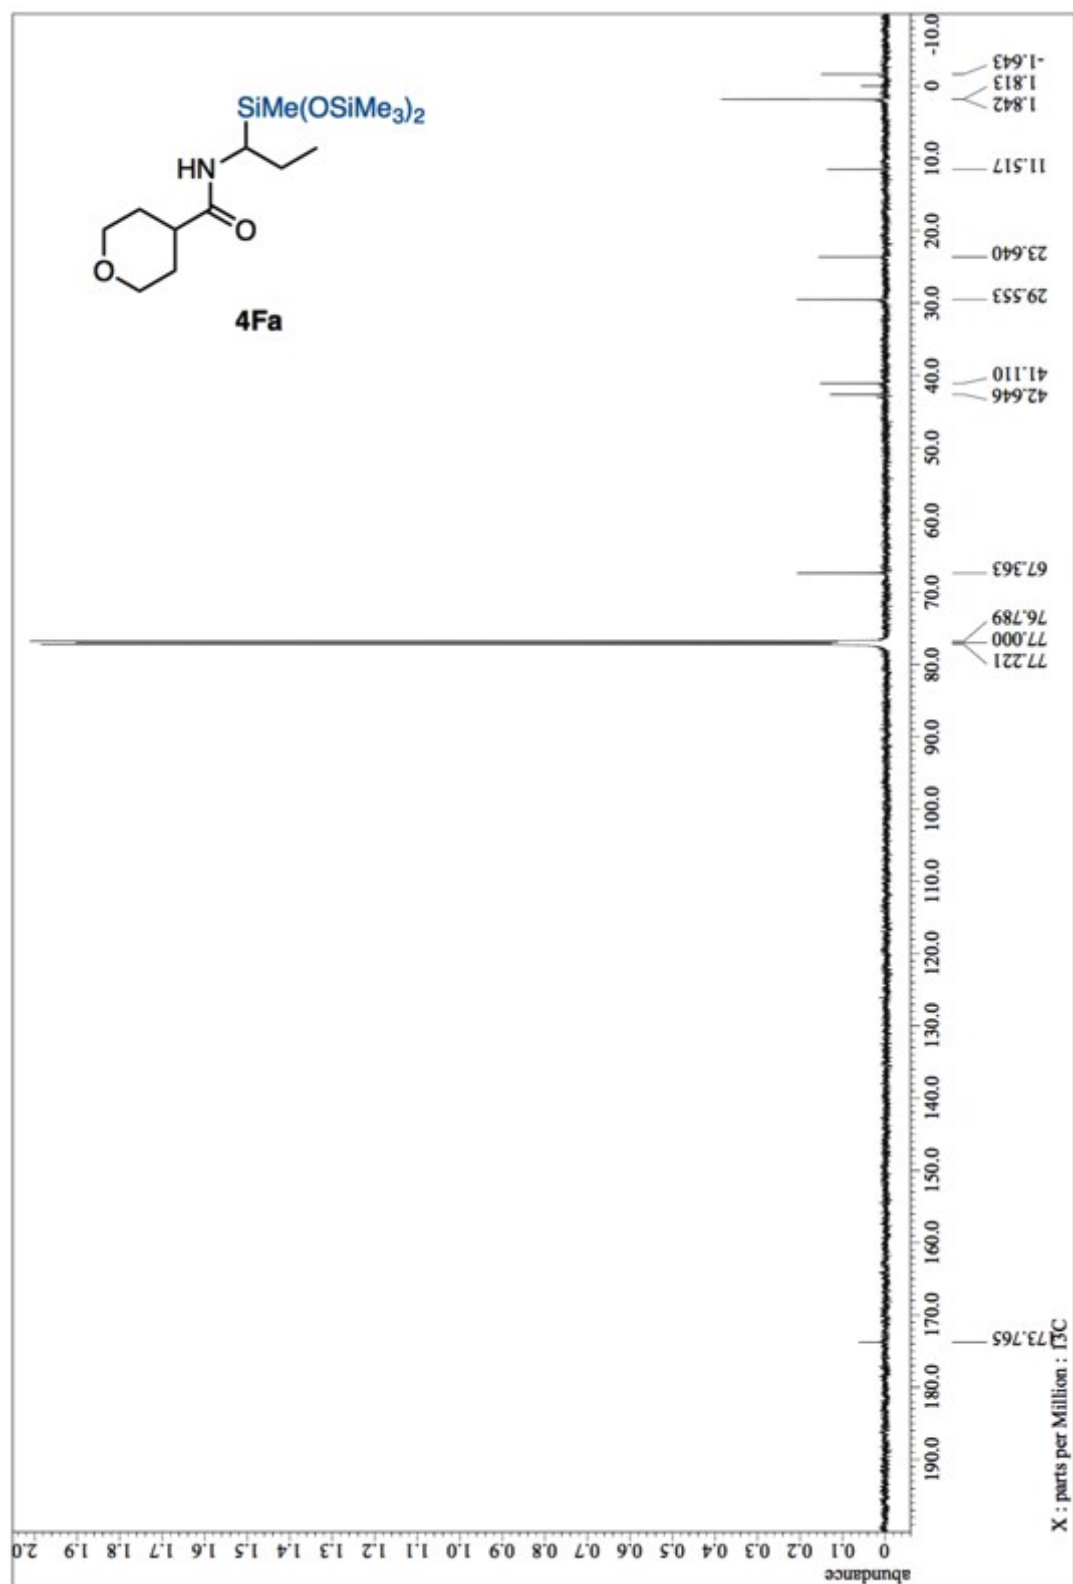

$^1\text{H}$  NMR (600 MHz, 120 °C, DMSO- $d_6$ ) of 4Ga

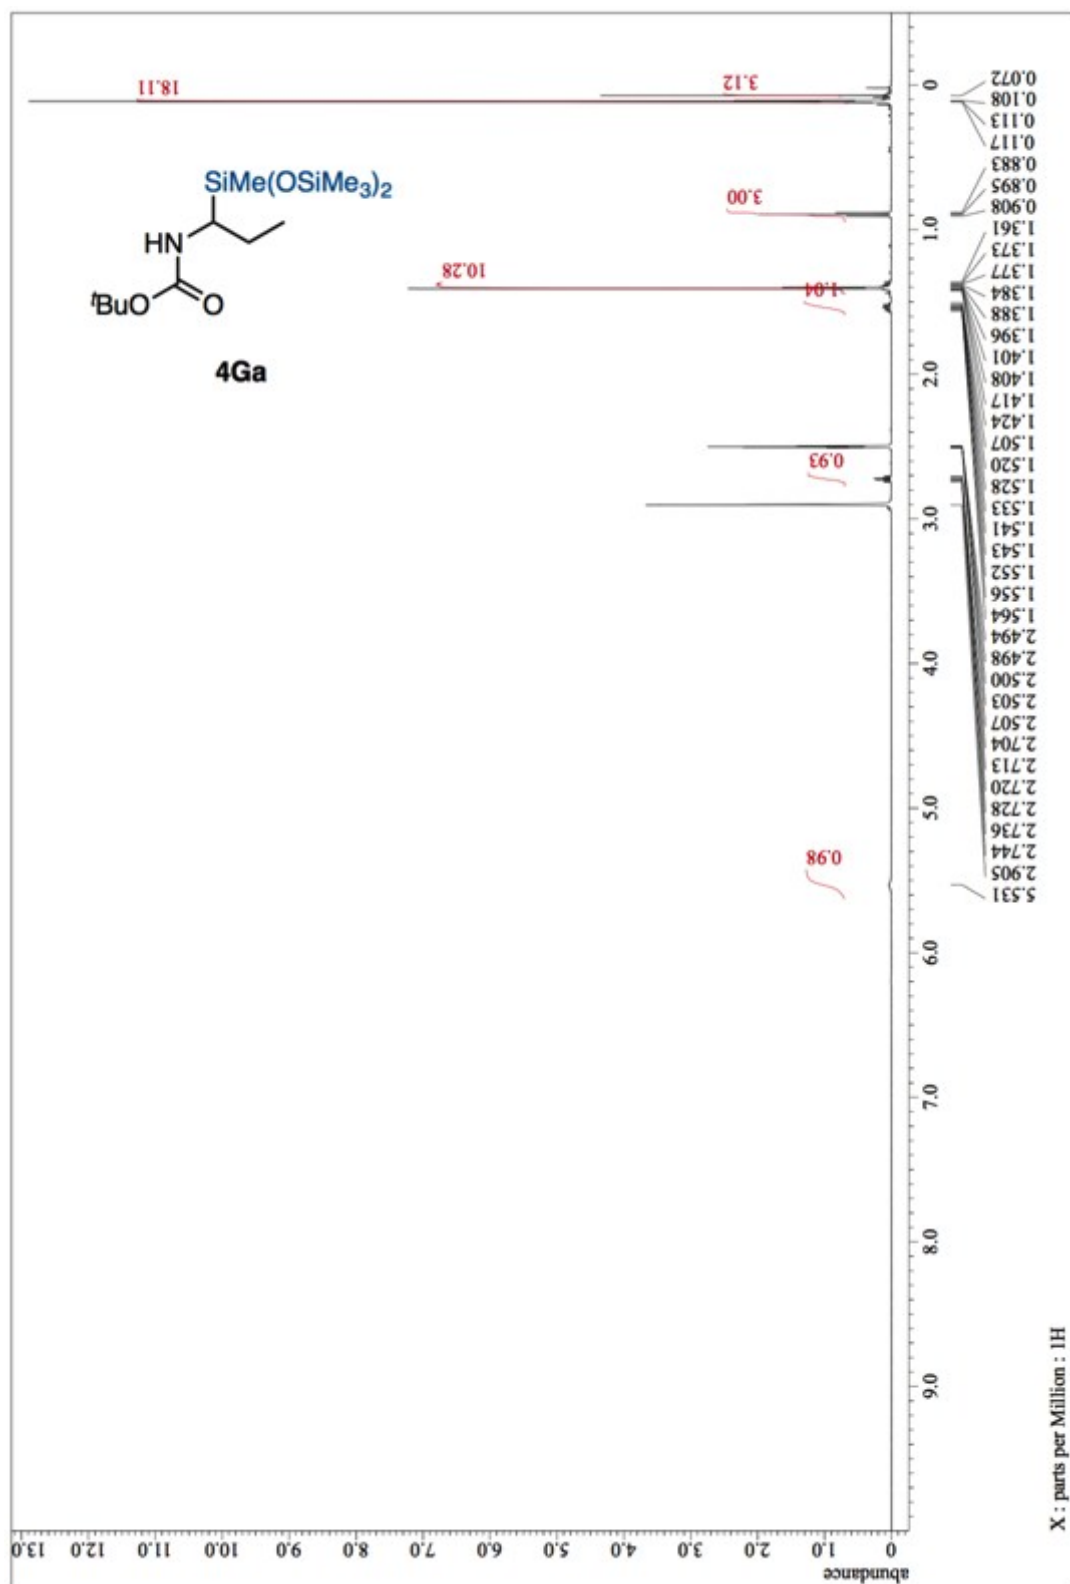

$^{13}\text{C}$  NMR (151 MHz, 120 °C,  $\text{DMSO}-d_6$ ) of 4Ga

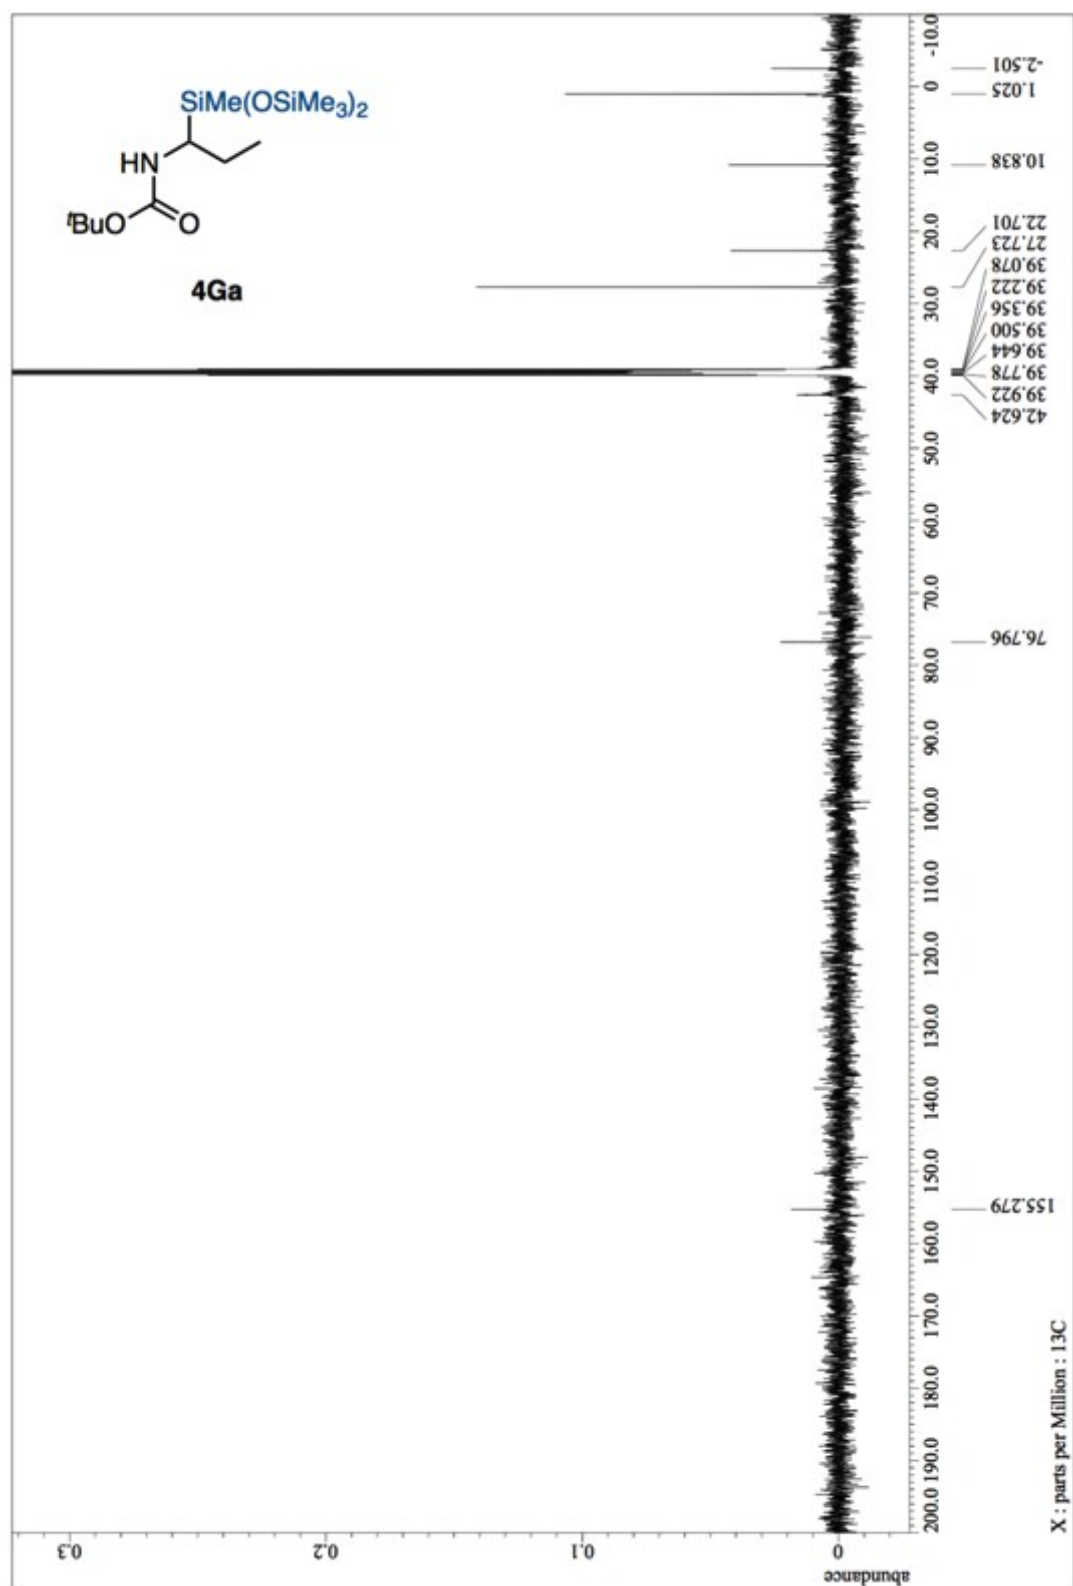

$^1\text{H}$  NMR (600MHz,  $\text{CDCl}_3$ ) of 4Ha

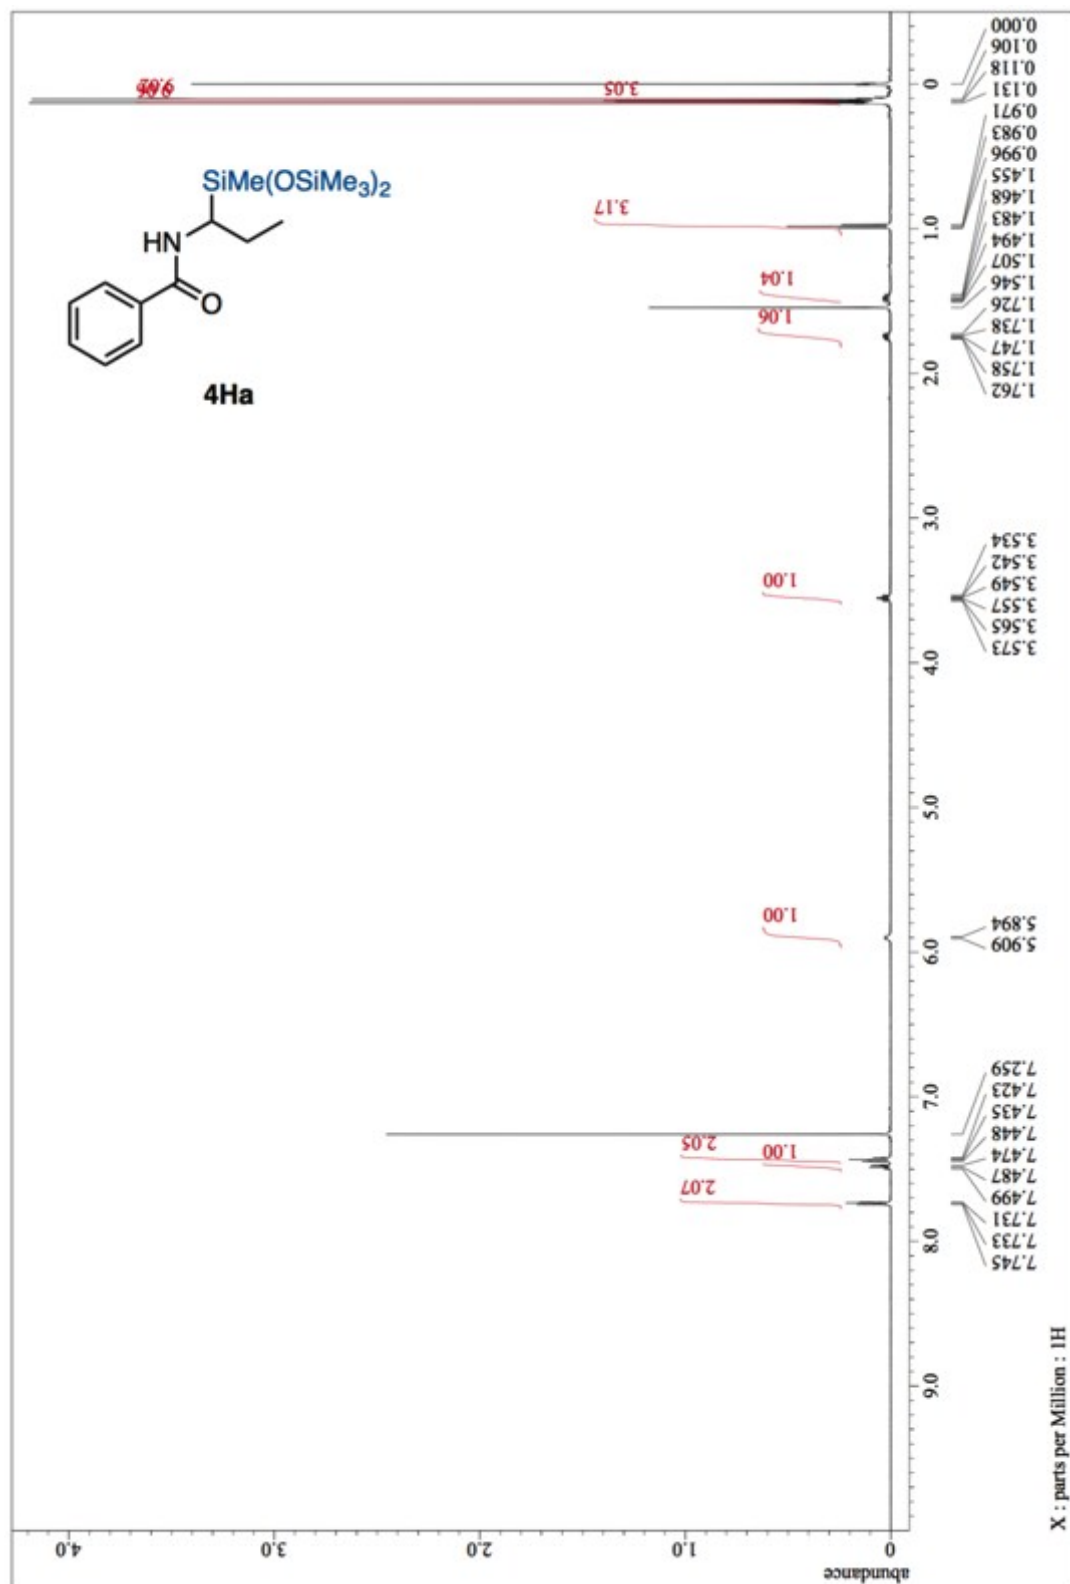

$^{13}\text{C}$  NMR (151MHz,  $\text{CDCl}_3$ ) of 4Ha

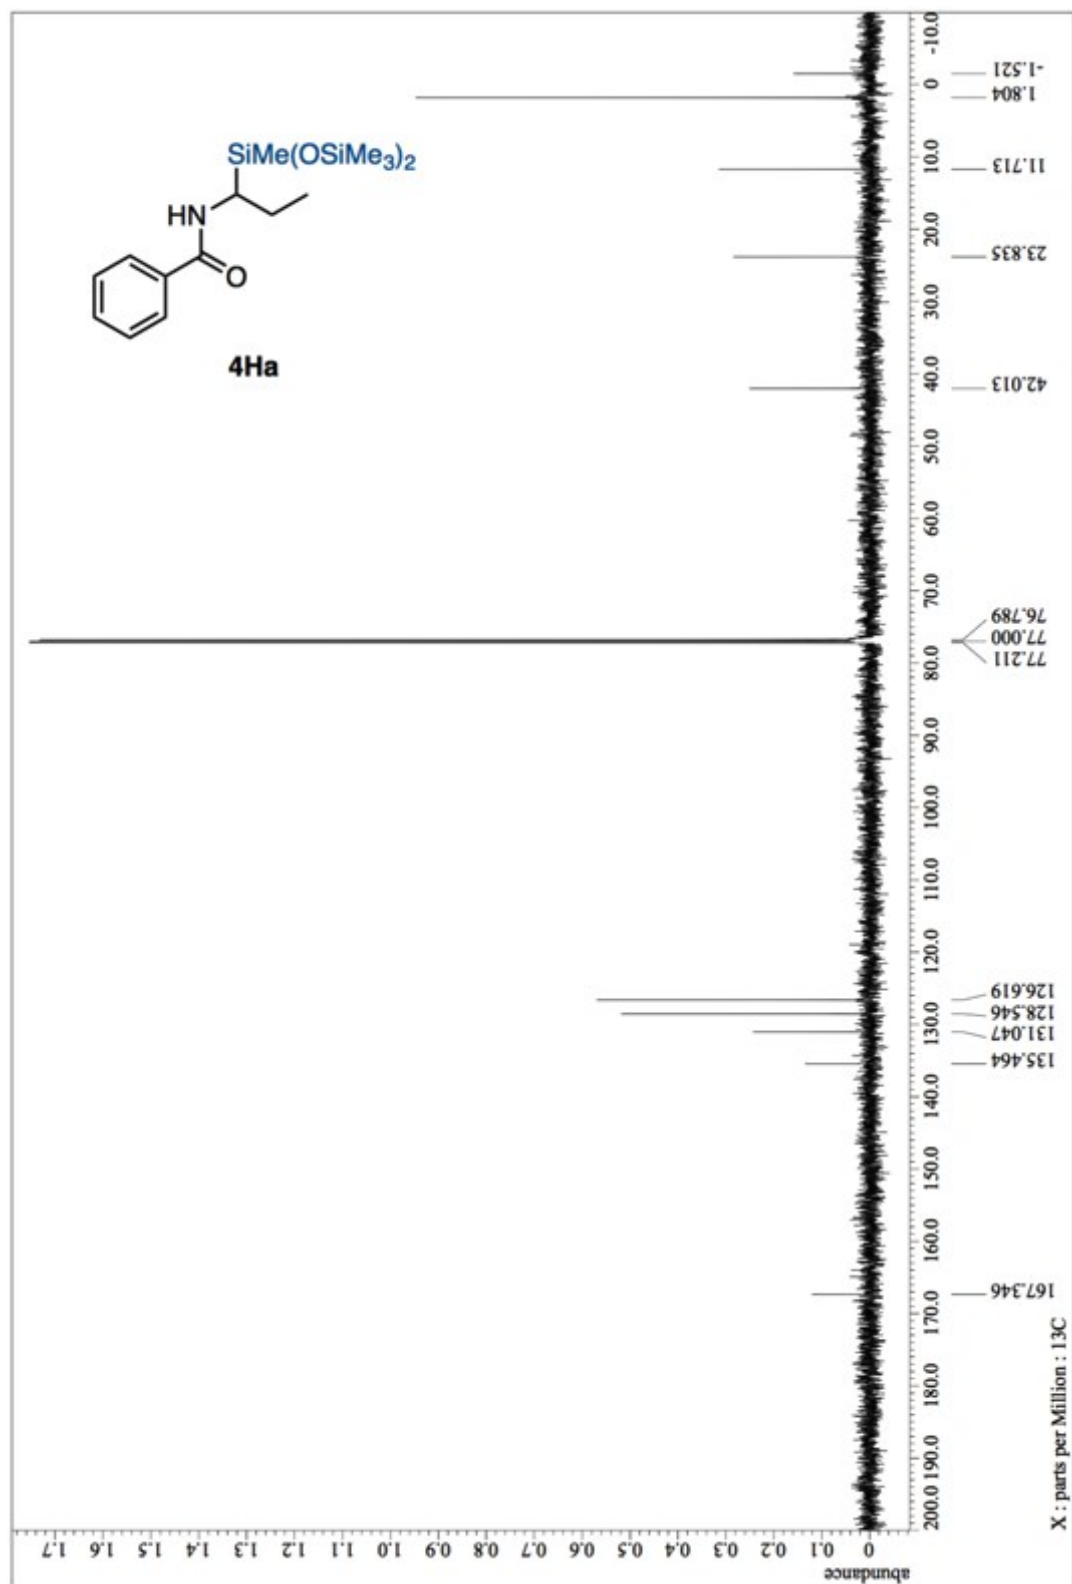



<sup>1</sup>H NMR (600MHz, CDCl<sub>3</sub>) of 4Ia

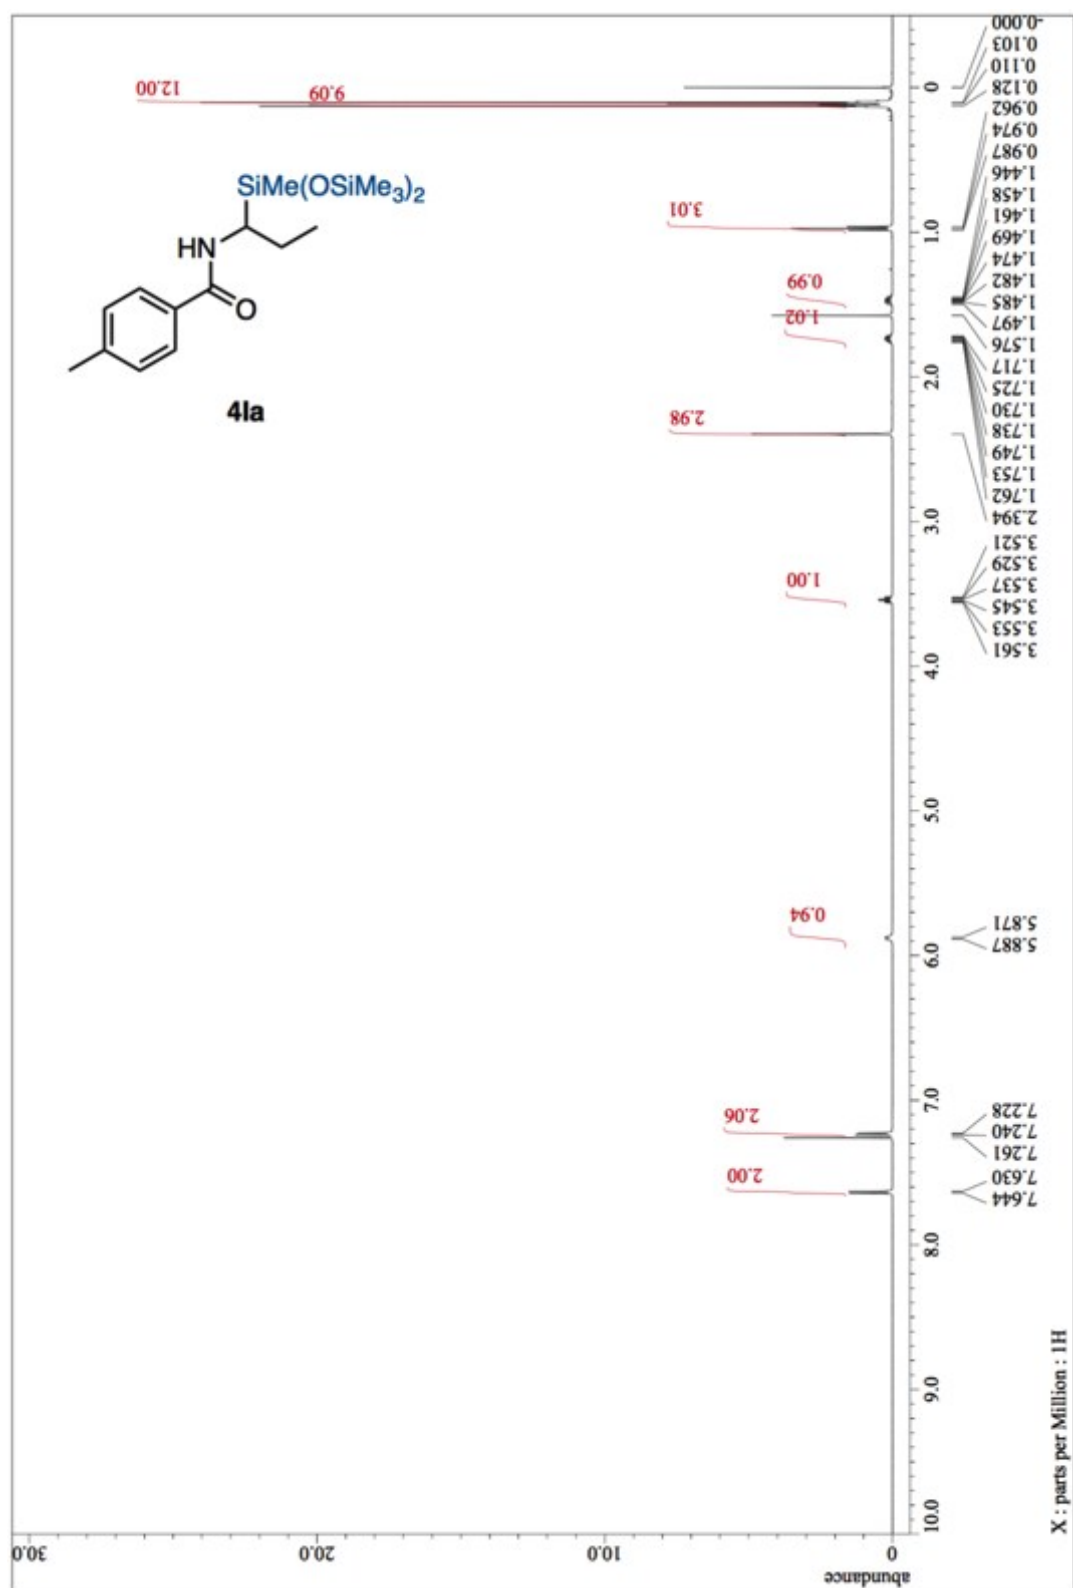

$^{13}\text{C}$  NMR (151MHz,  $\text{CDCl}_3$ ) of 4Ia

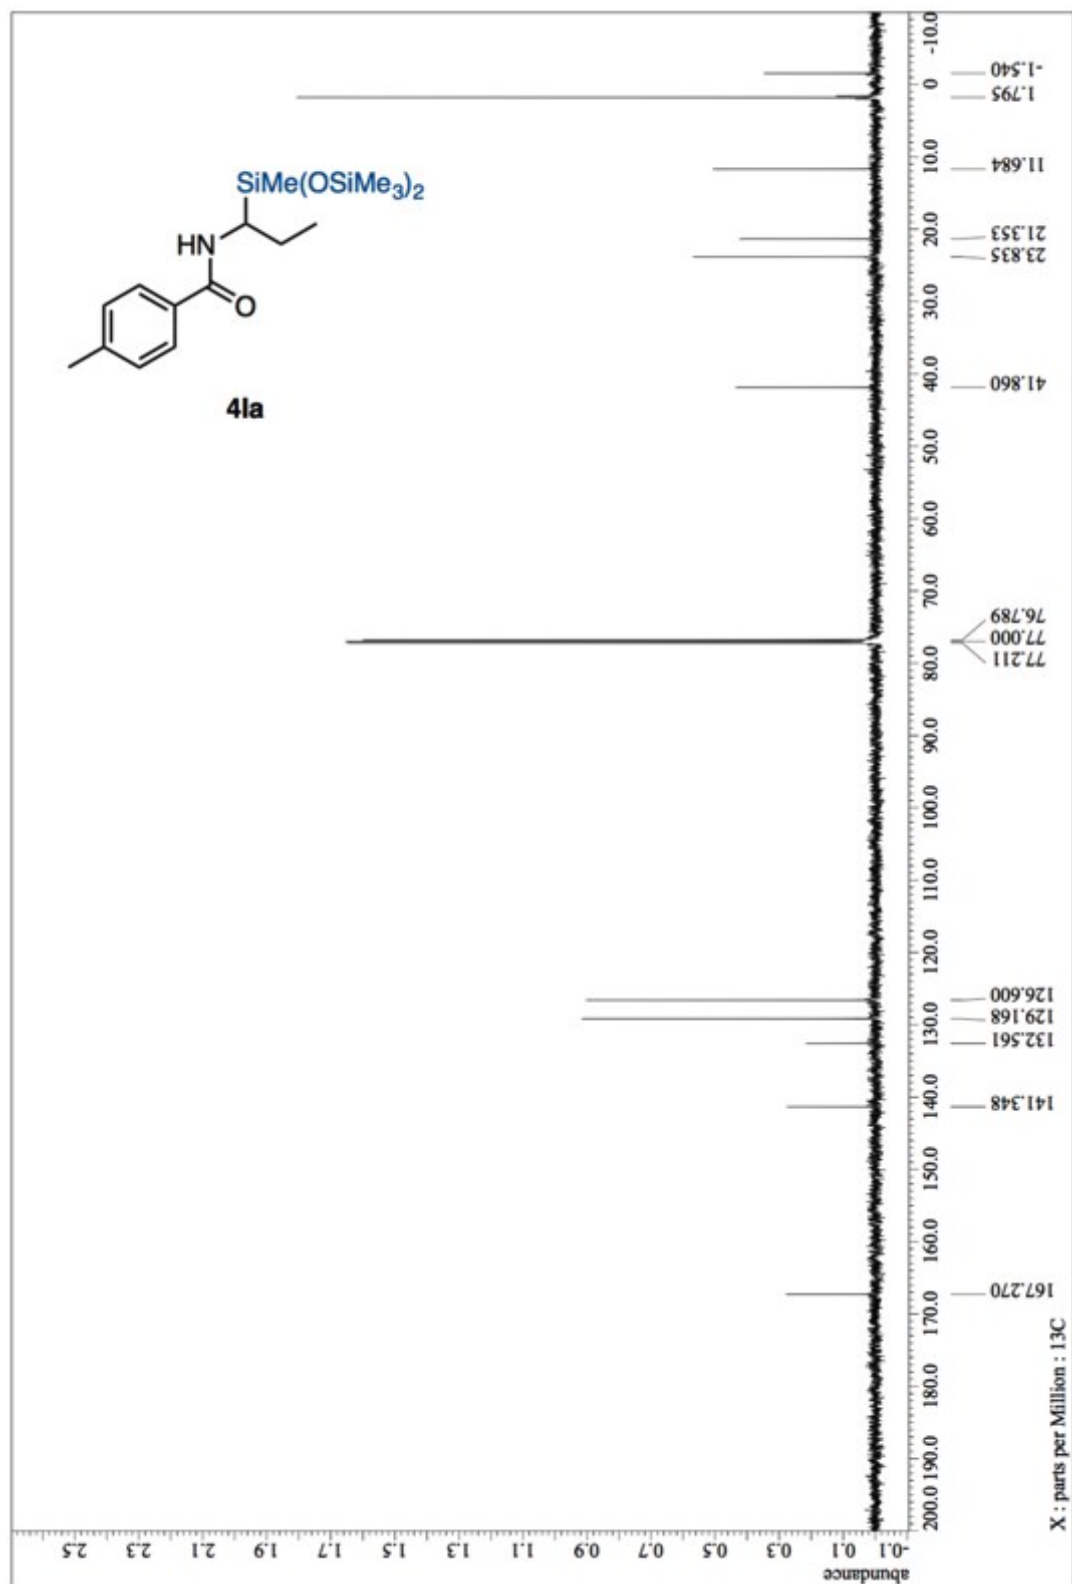

<sup>1</sup>H NMR (600MHz, CDCl<sub>3</sub>) of 4Ja

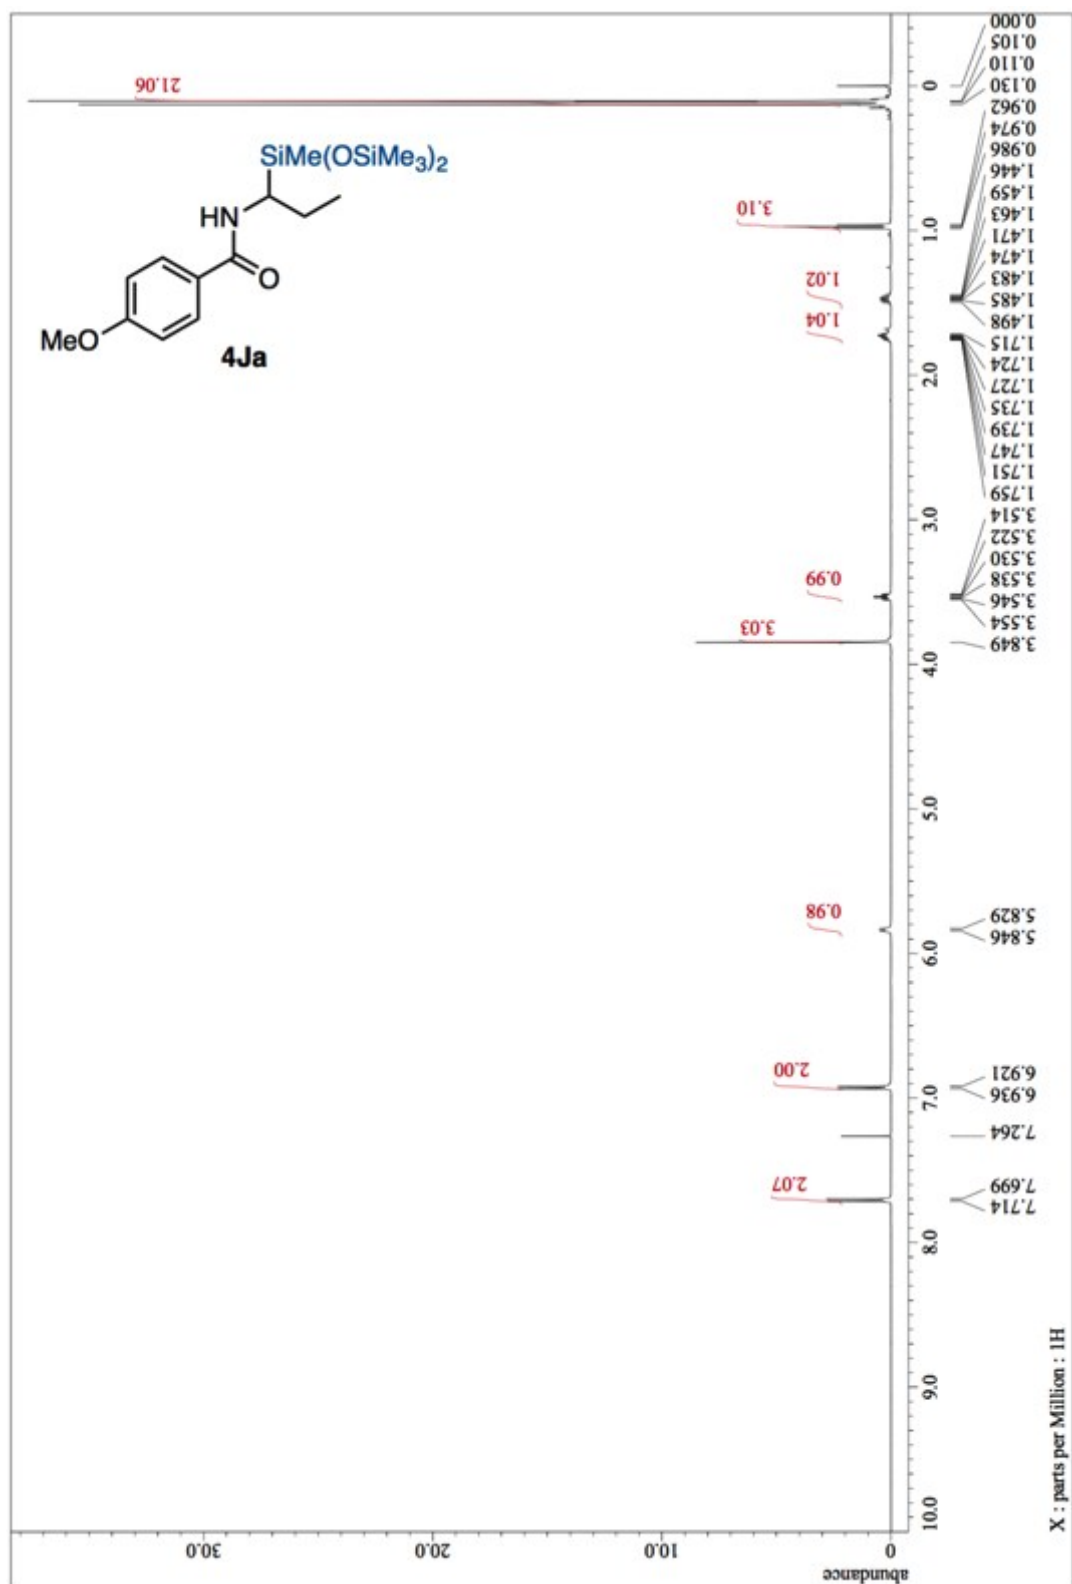

$^{13}\text{C}$  NMR (151MHz,  $\text{CDCl}_3$ ) of 4Ja

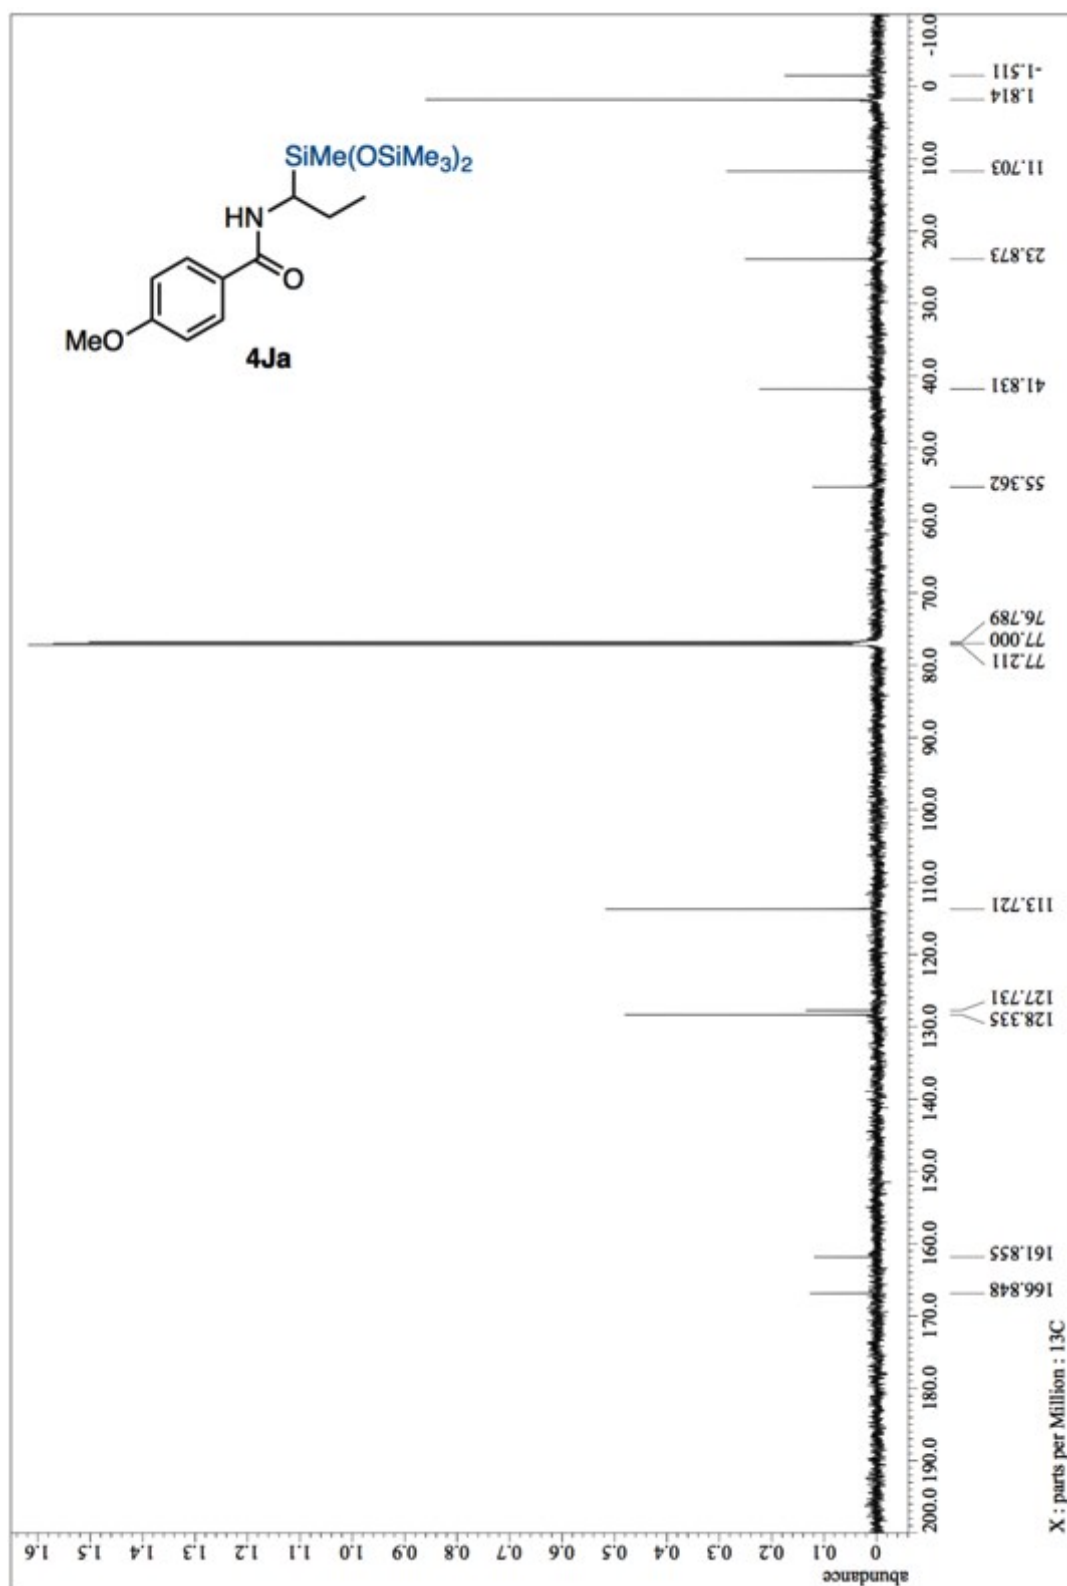

$^1\text{H}$  NMR (600MHz,  $\text{CDCl}_3$ ) of 4Ka

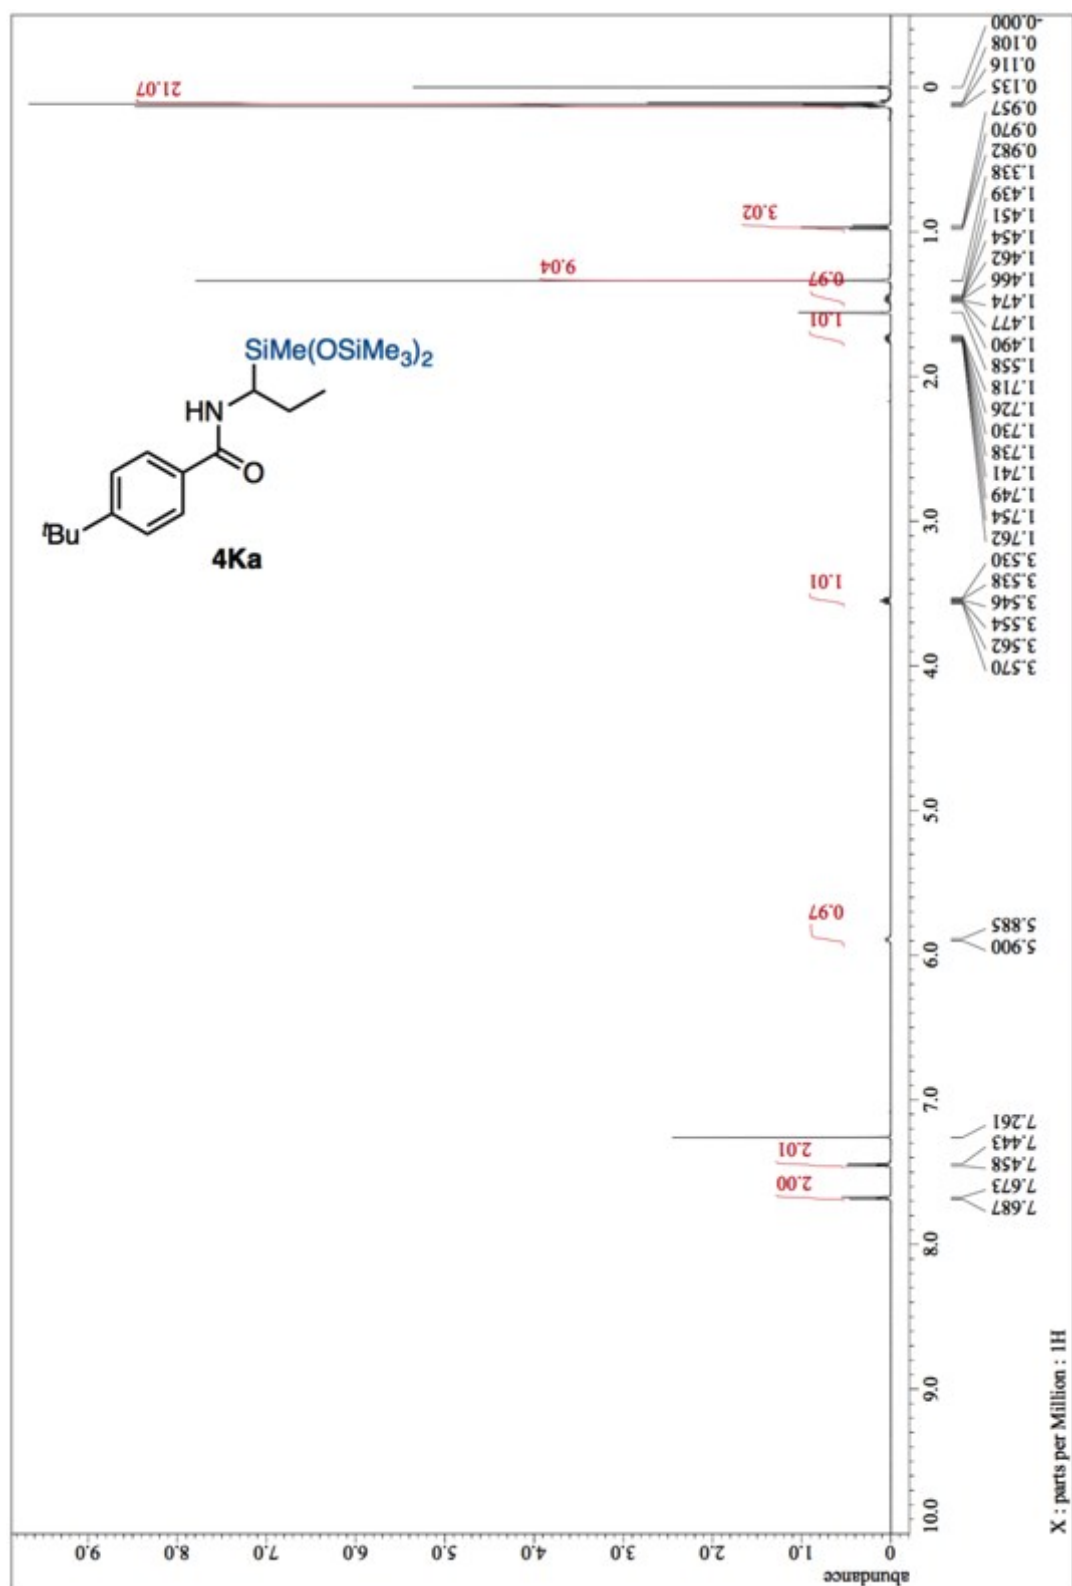

$^{13}\text{C}$  NMR (151MHz,  $\text{CDCl}_3$ ) of 4Ka

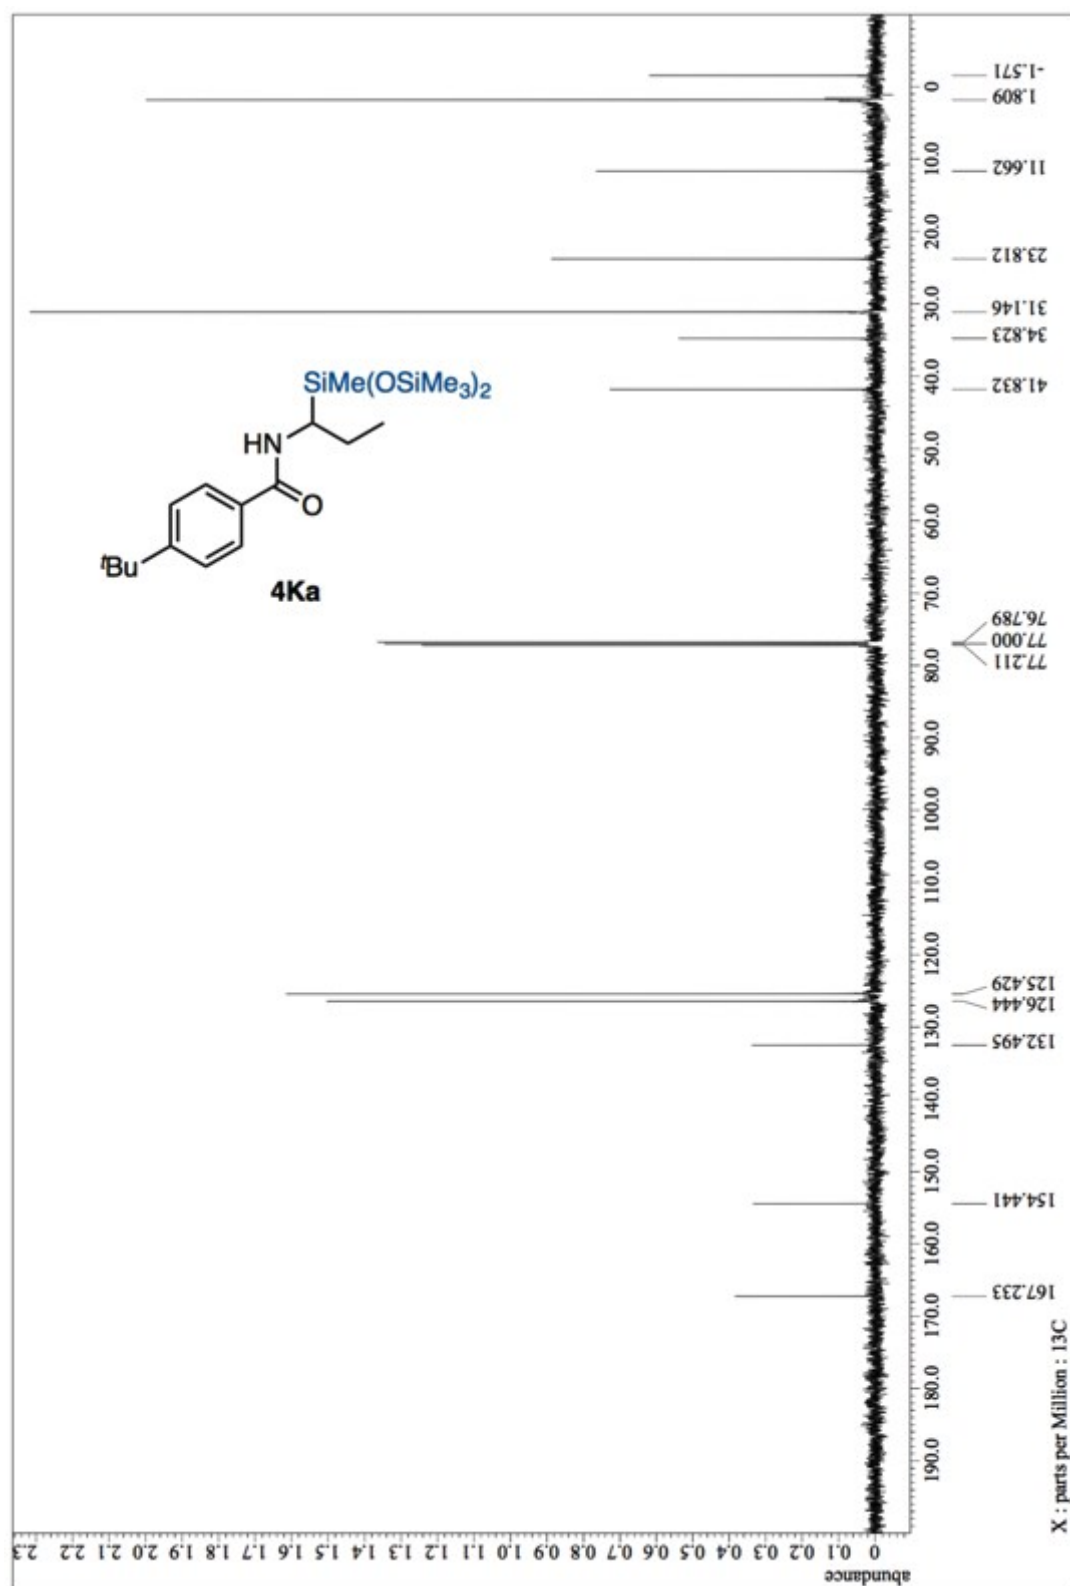

$^1\text{H}$  NMR (600MHz,  $\text{CDCl}_3$ ) of 4La

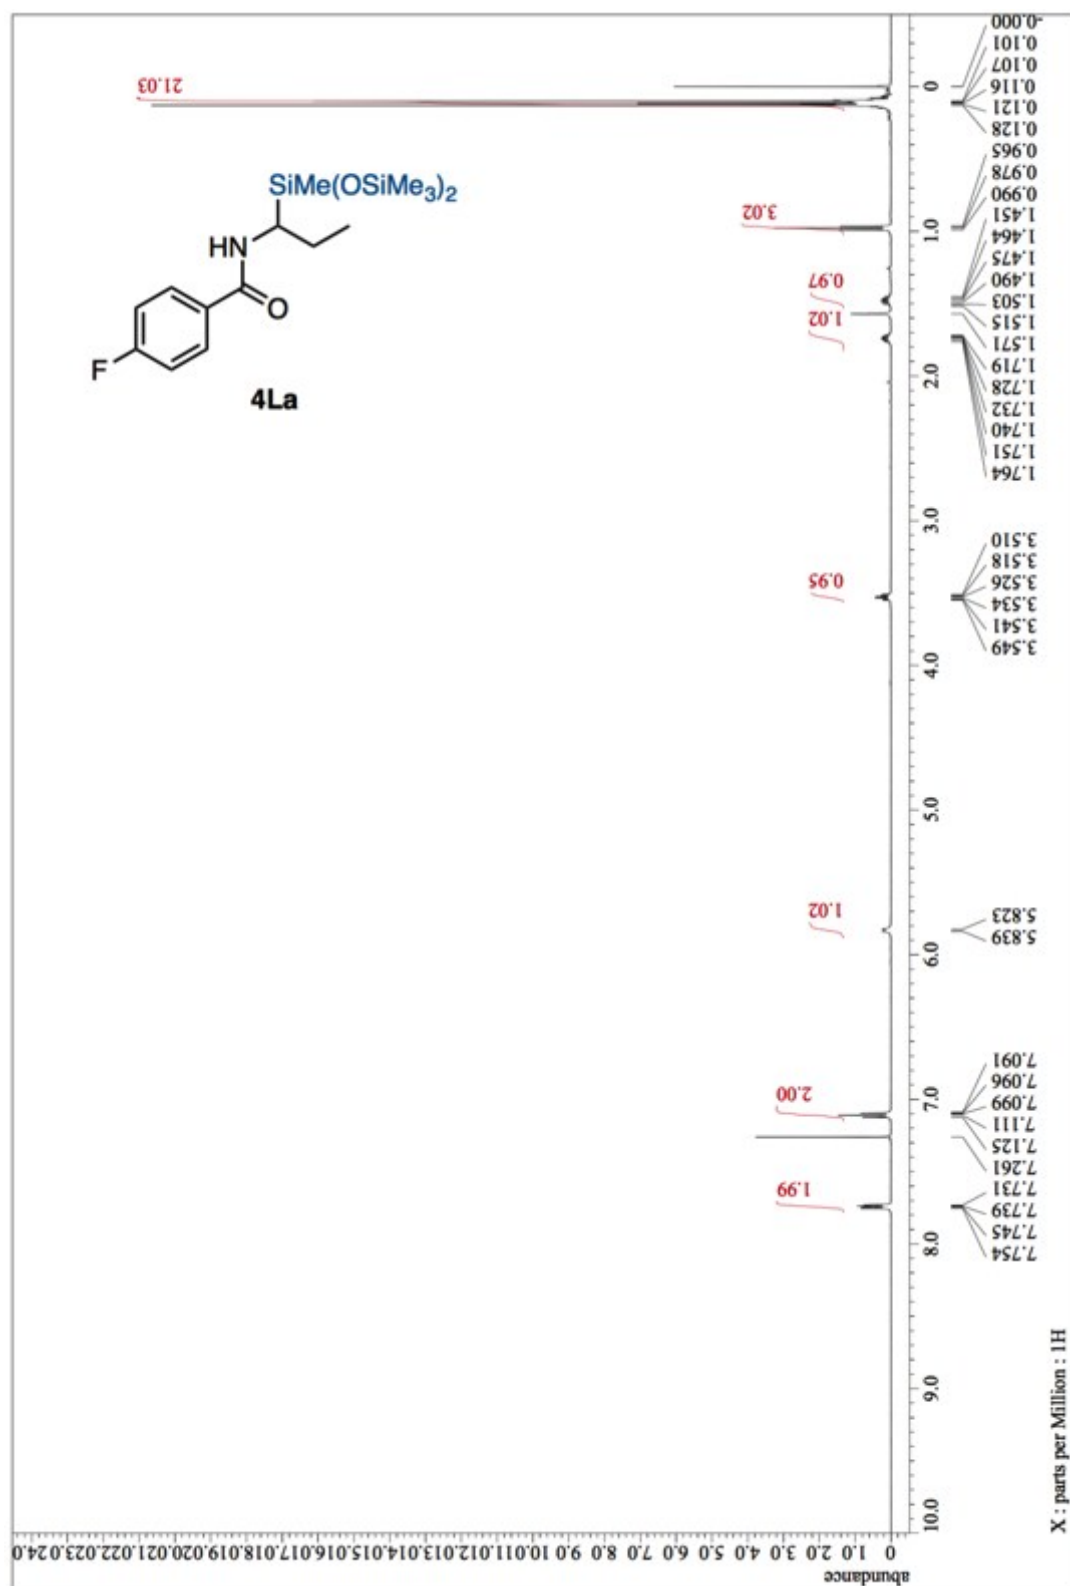

$^{13}\text{C}$  NMR (151MHz,  $\text{CDCl}_3$ ) of 4La

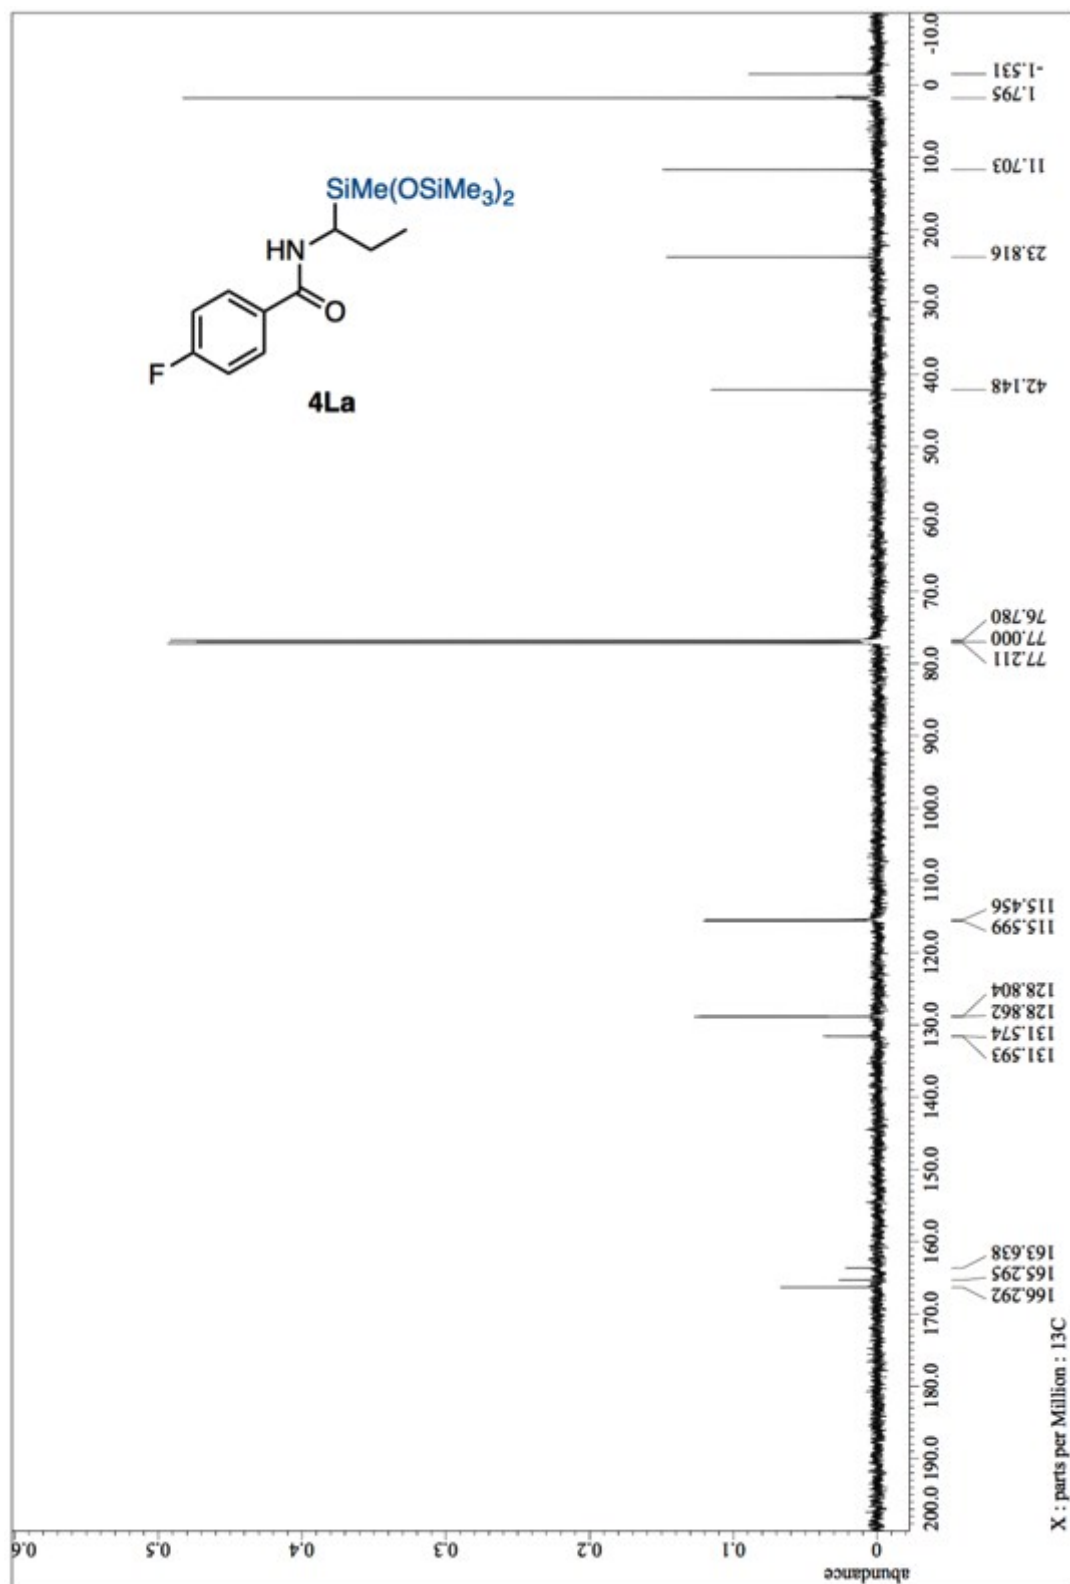



<sup>1</sup>H NMR (600MHz, CDCl<sub>3</sub>) of 4Ma

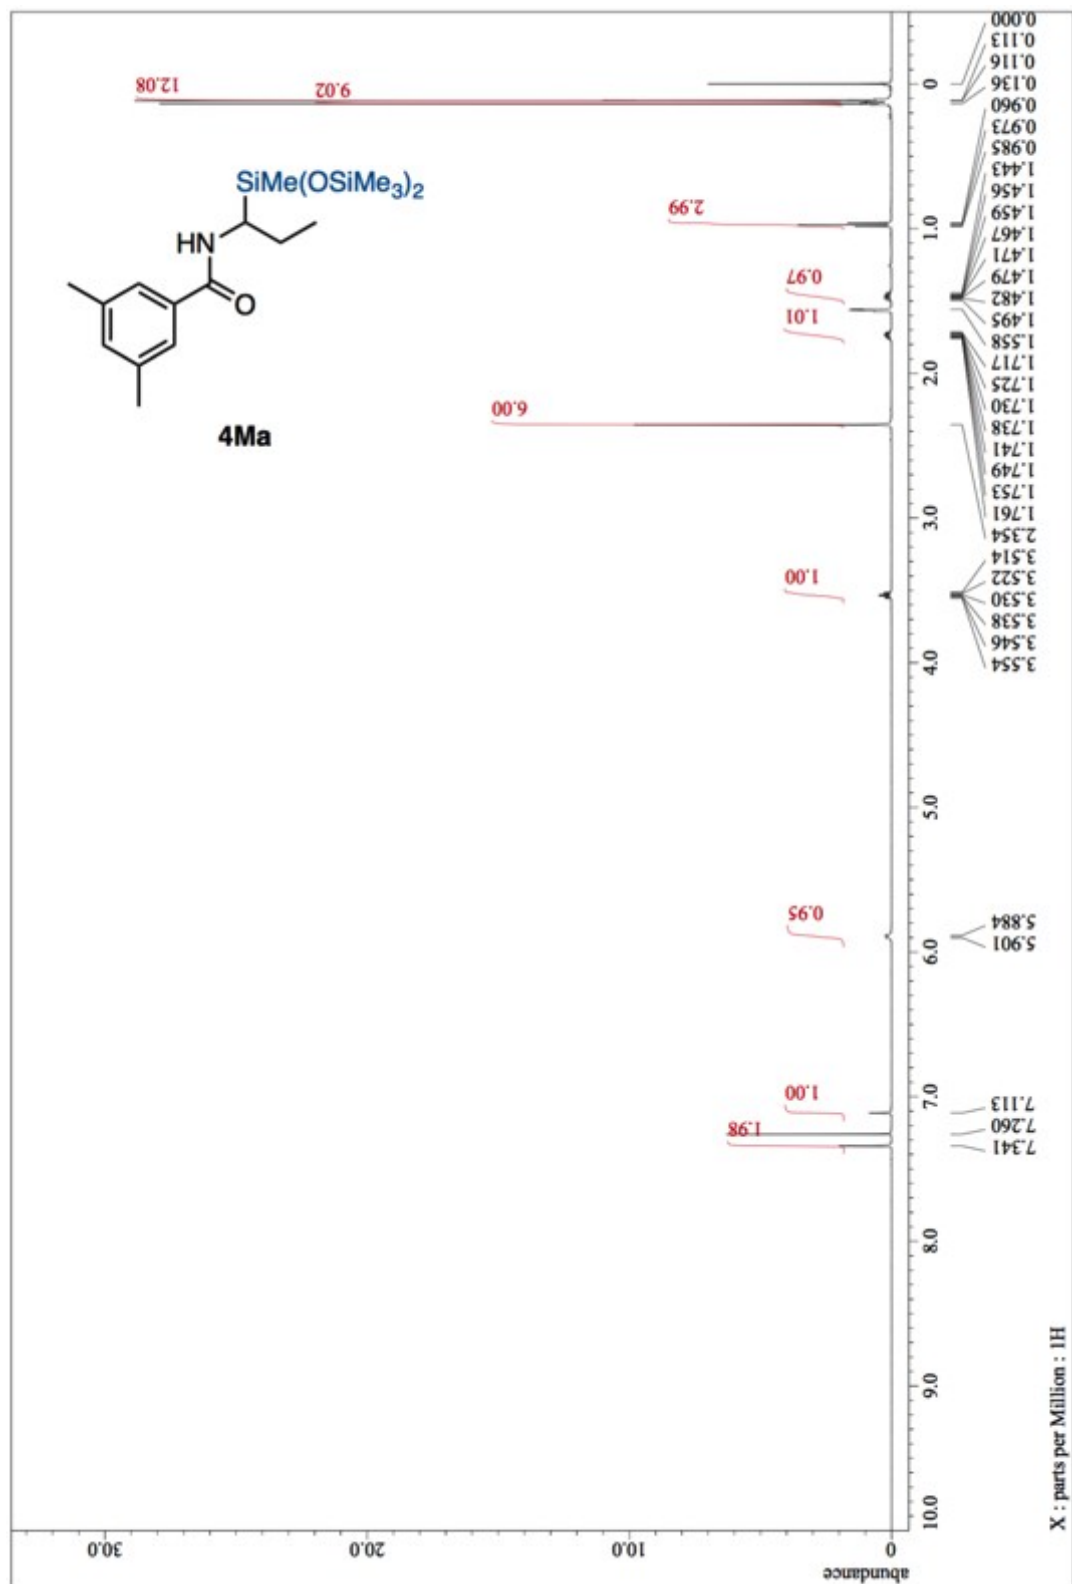

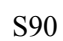

$^1\text{H}$  NMR (600MHz,  $\text{CDCl}_3$ ) of 4Na

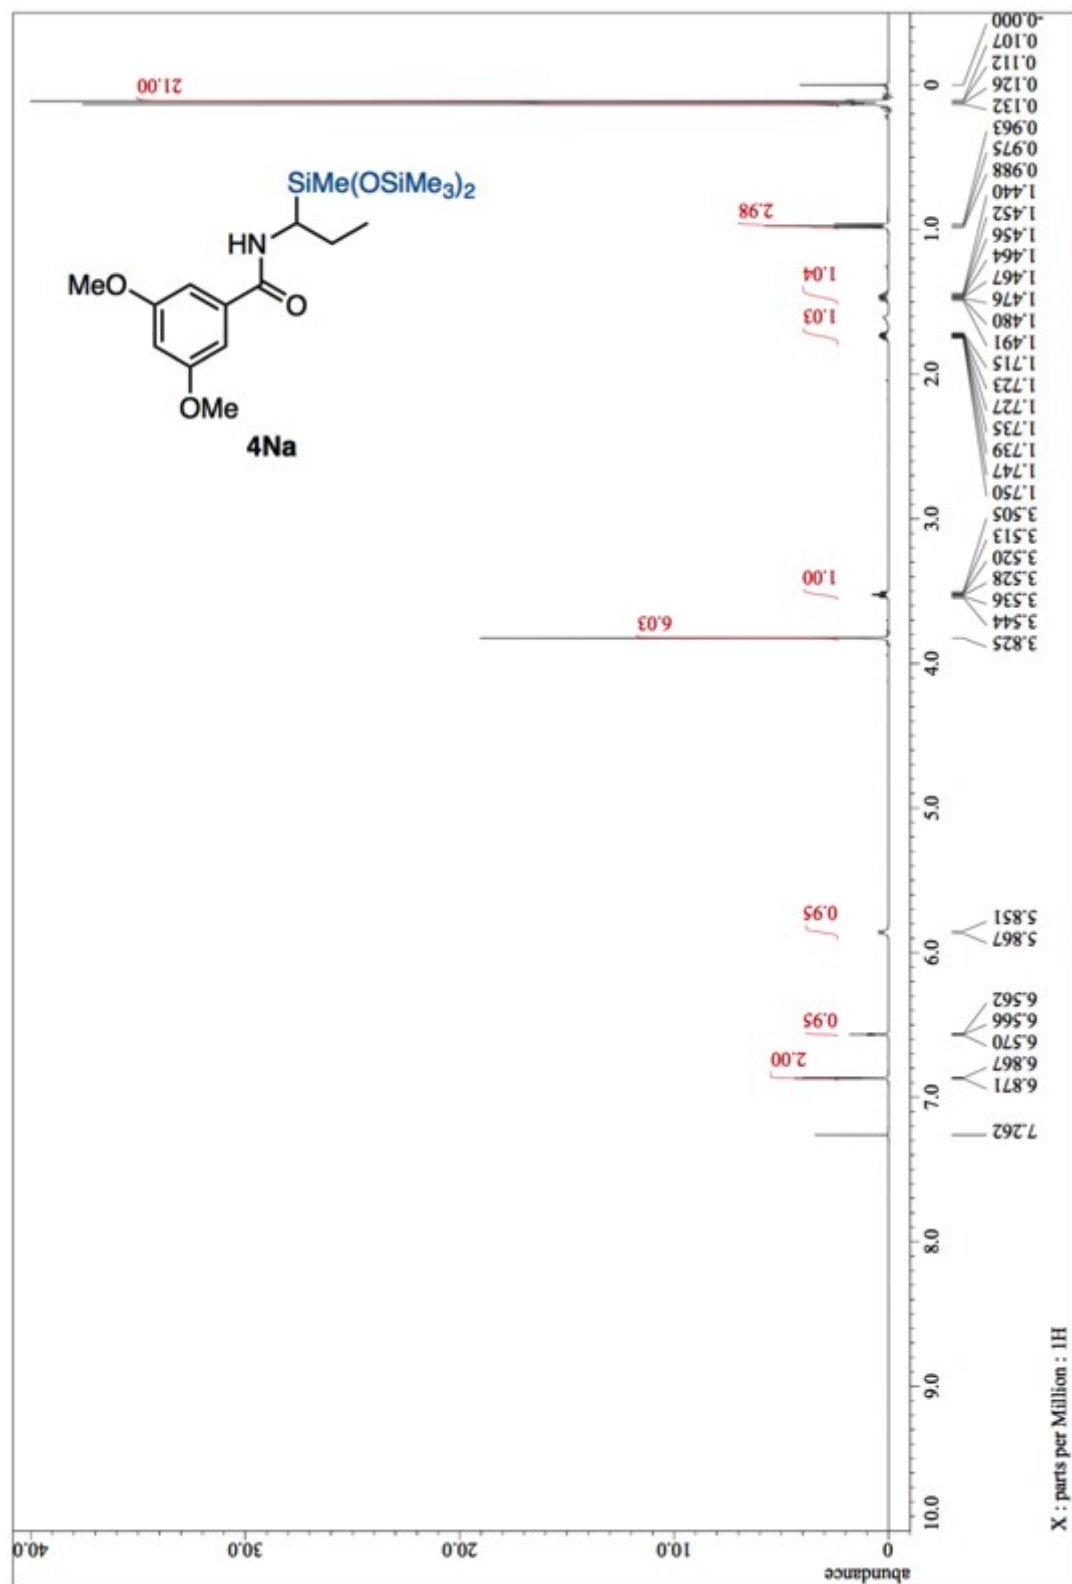

$^{13}\text{C}$  NMR (151MHz,  $\text{CDCl}_3$ ) of 4Na

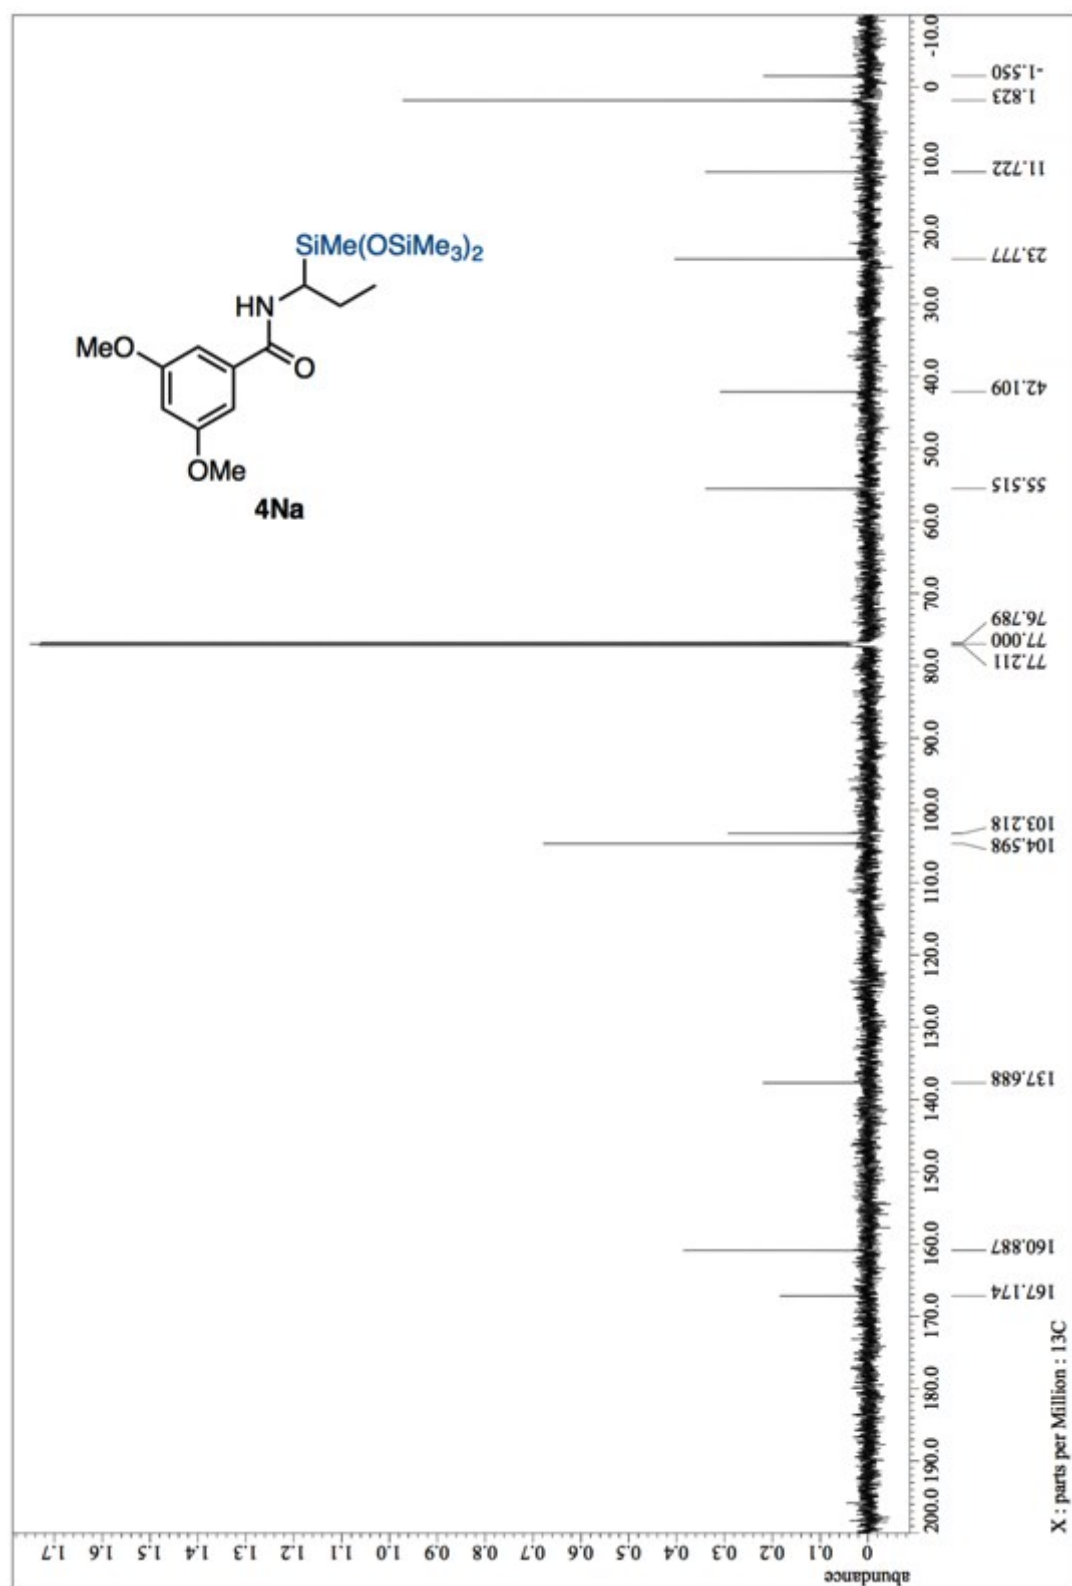

<sup>1</sup>H NMR (600MHz, CDCl<sub>3</sub>) of 4Oa

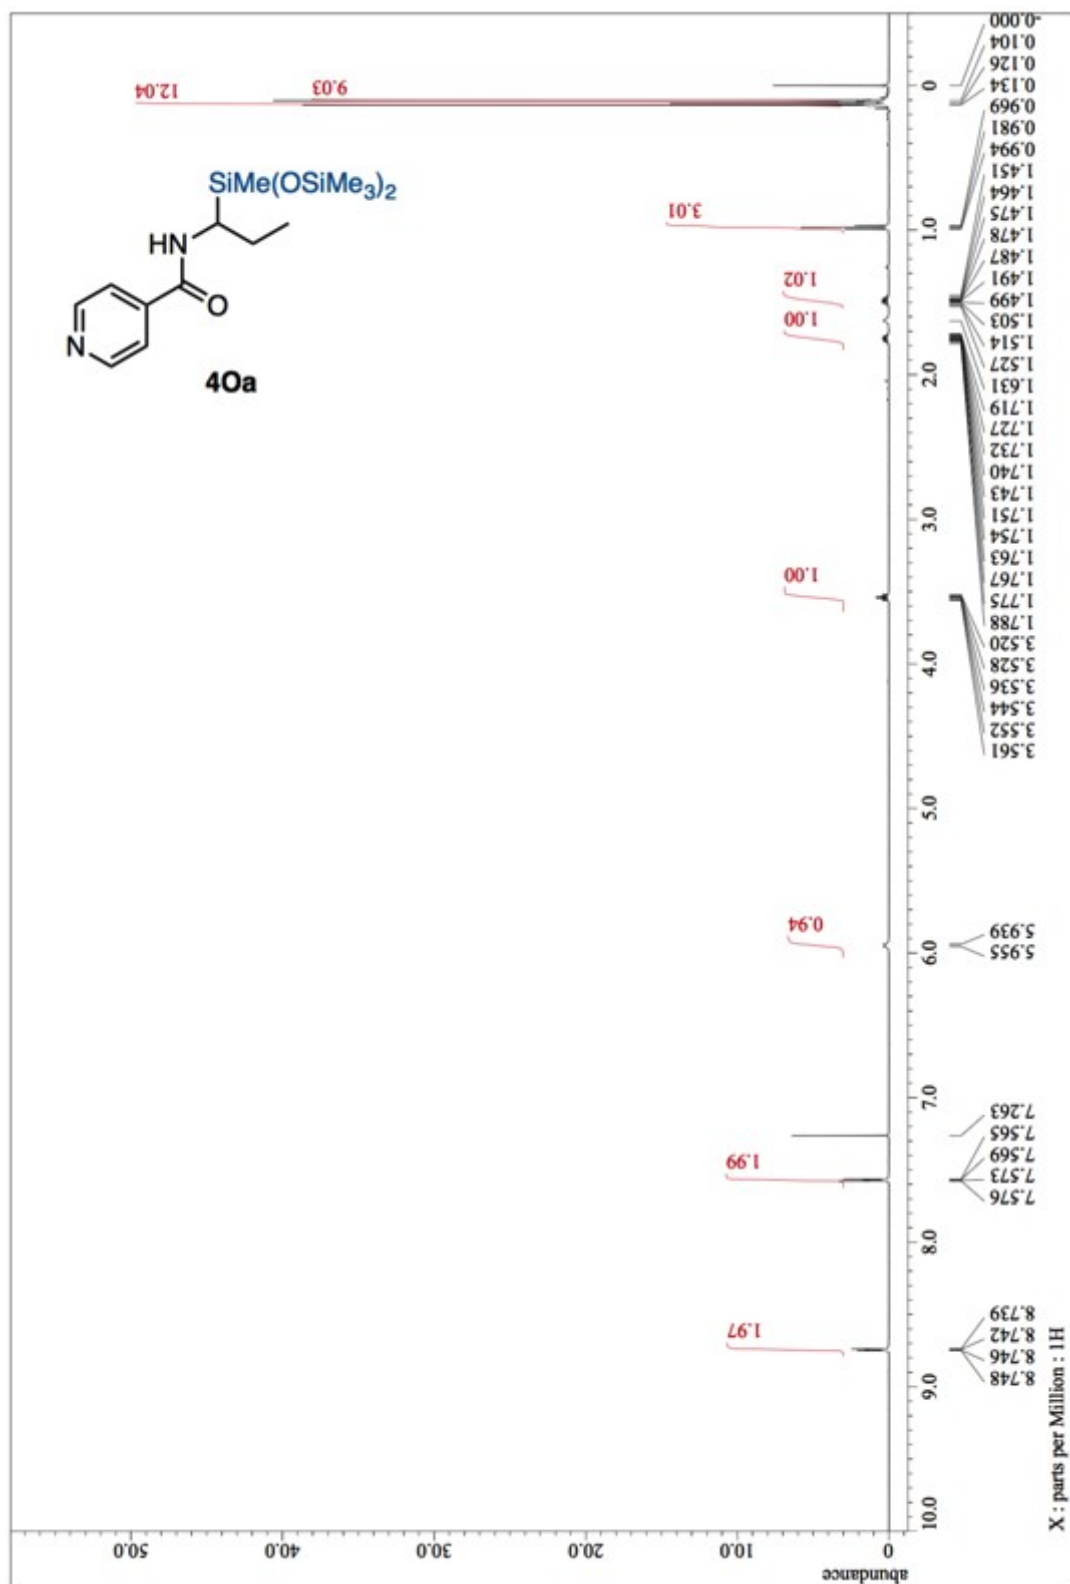

$^{13}\text{C}$  NMR (151MHz,  $\text{CDCl}_3$ ) of 4Oa

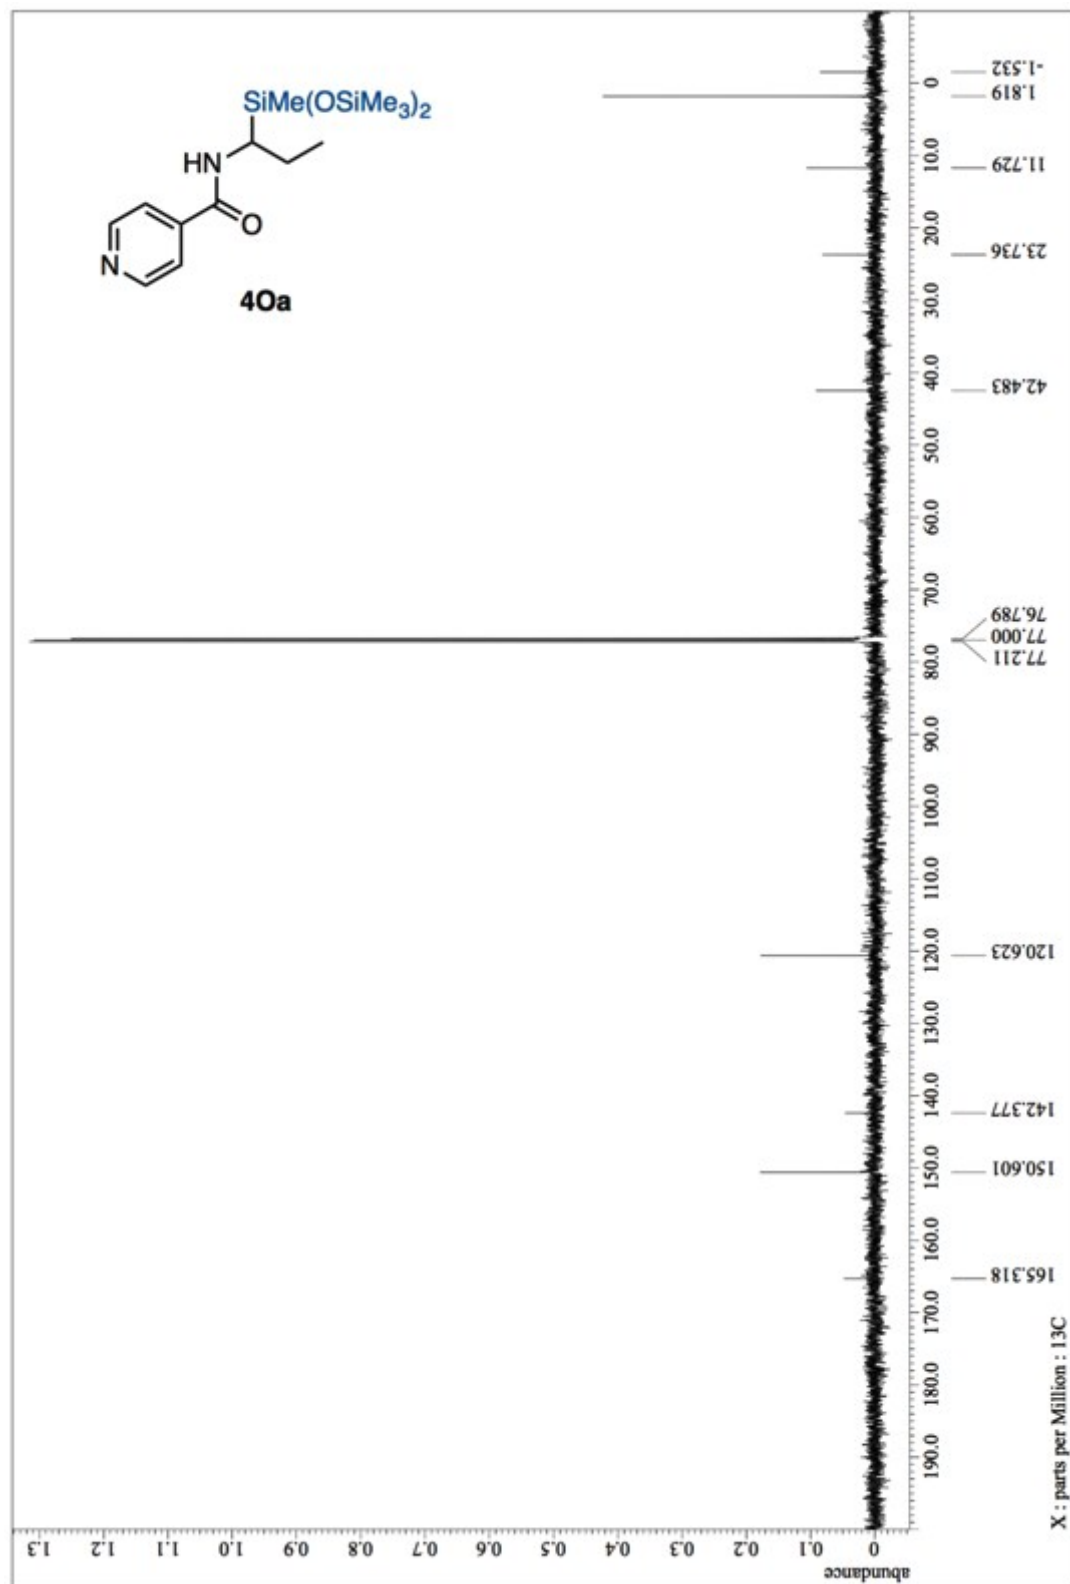

<sup>1</sup>H NMR (600MHz, CDCl<sub>3</sub>) of 4Pa

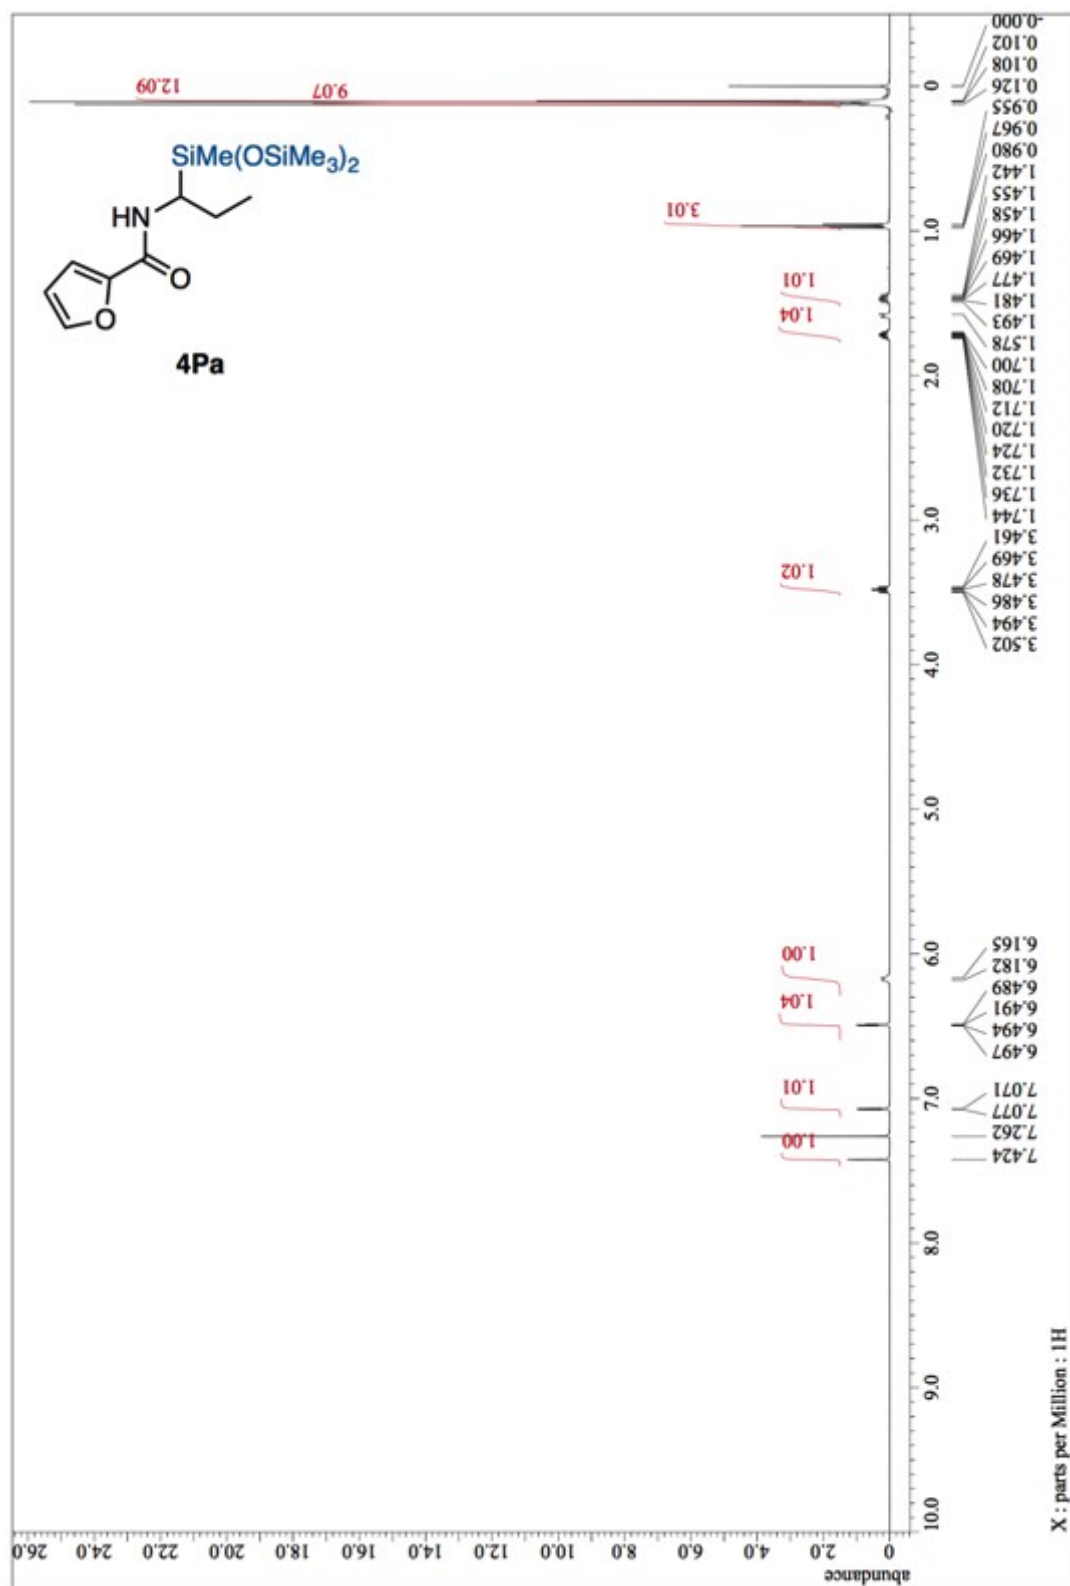

$^{13}\text{C}$  NMR (151MHz,  $\text{CDCl}_3$ ) of 4Pa

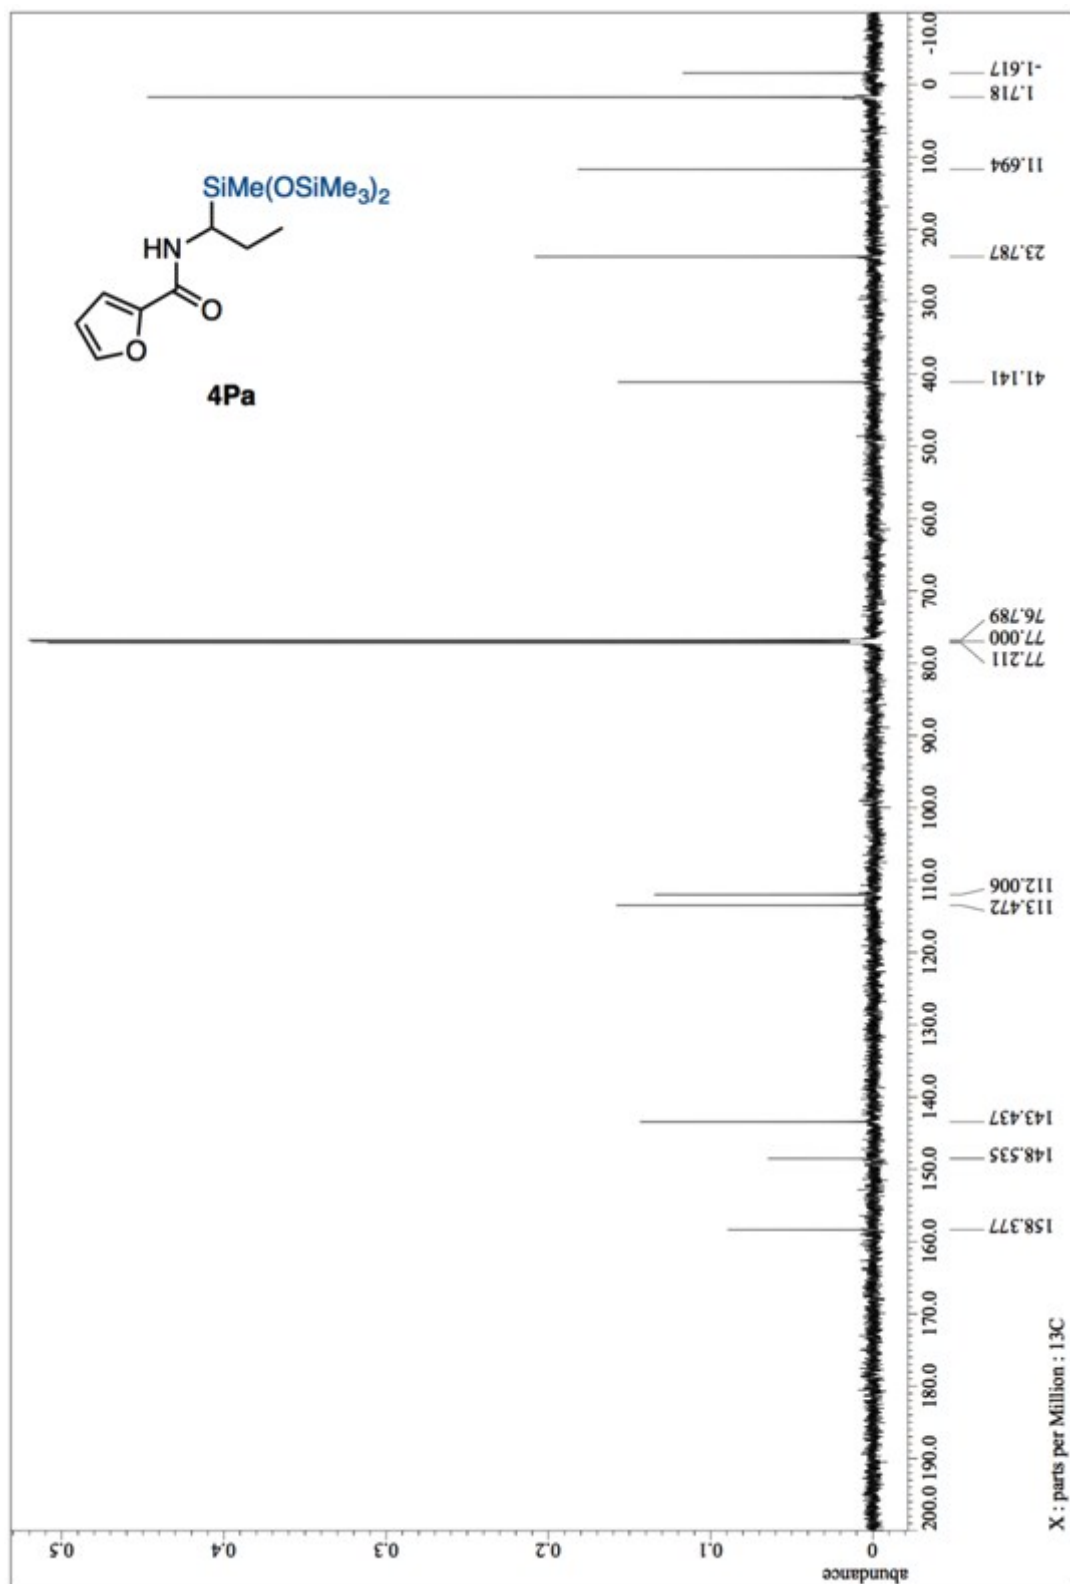



<sup>1</sup>H NMR (500MHz, CDCl<sub>3</sub>) of 4Qa

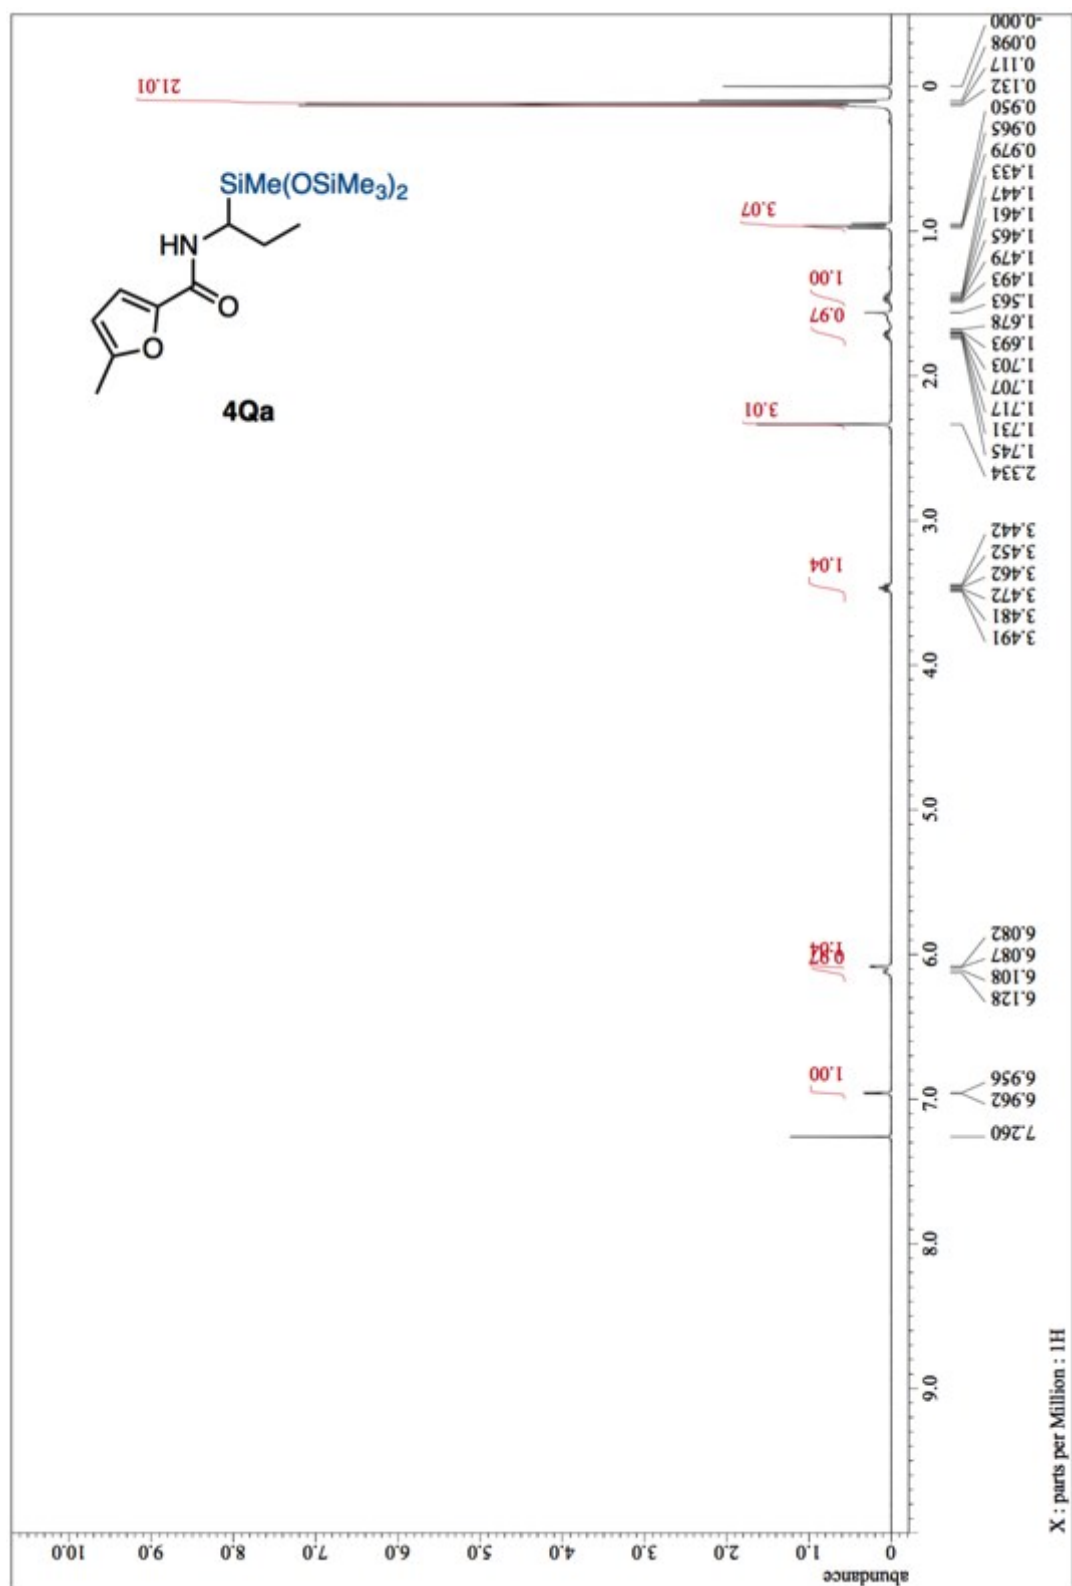

$^{13}\text{C}$  NMR (151MHz,  $\text{CDCl}_3$ ) of 4Qa

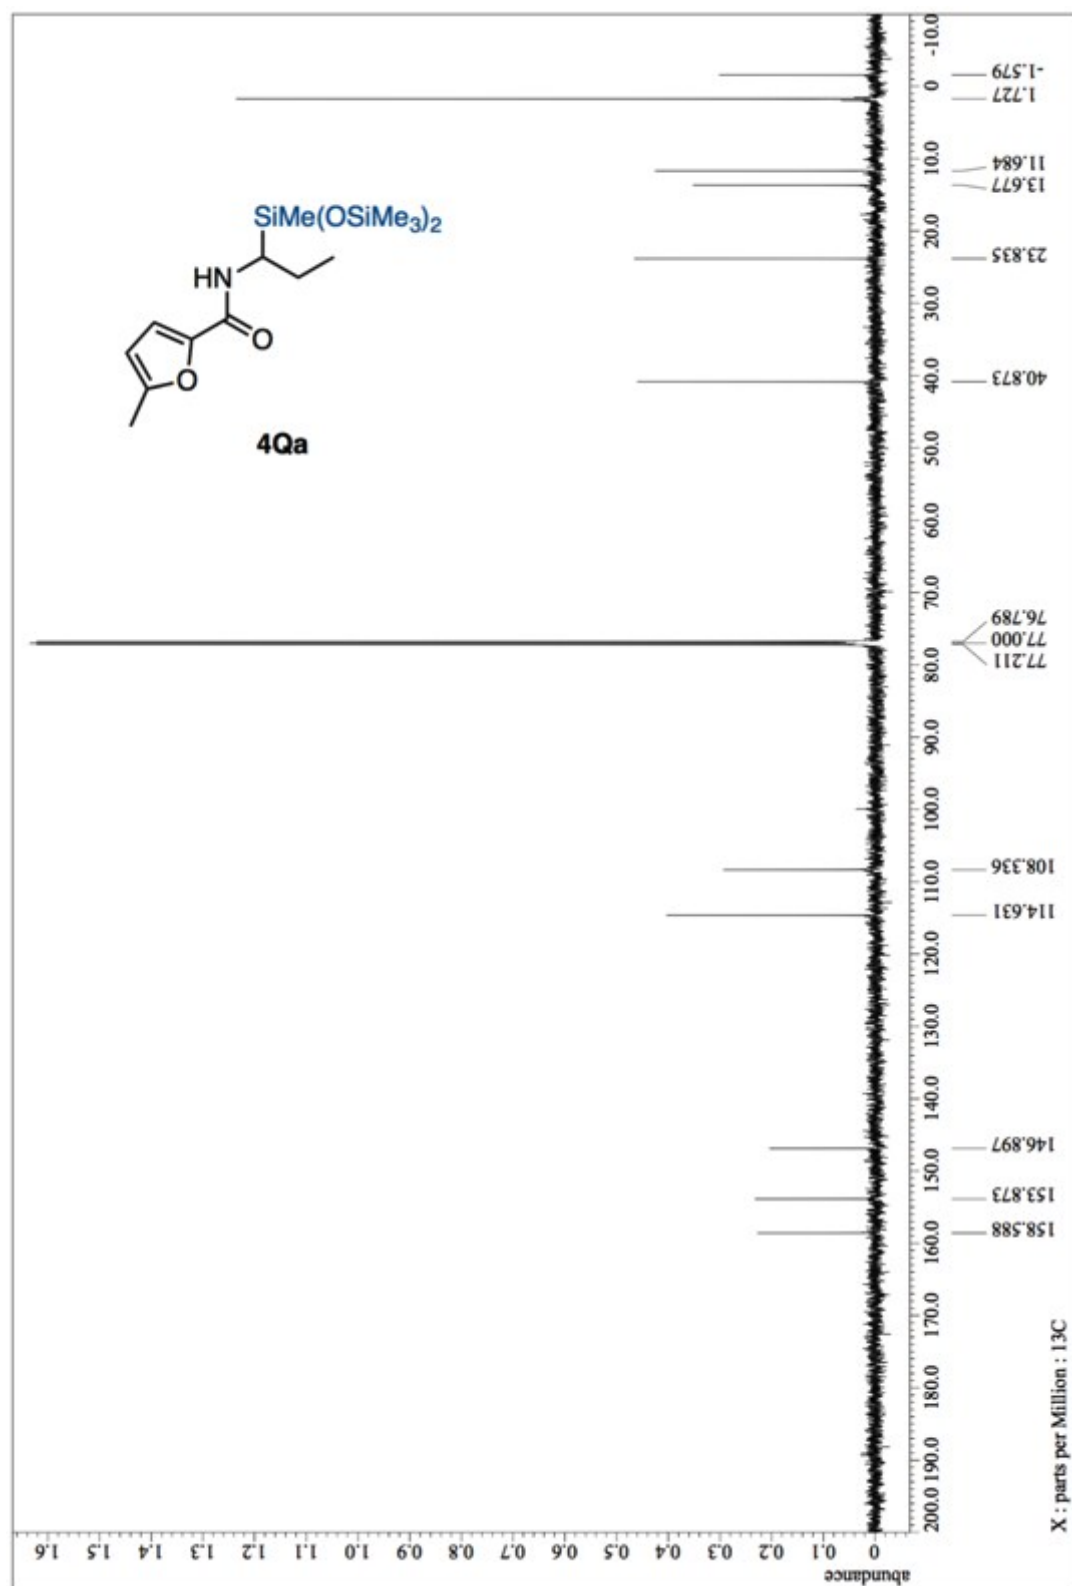

<sup>1</sup>H NMR (500MHz, CDCl<sub>3</sub>) of 4Ra

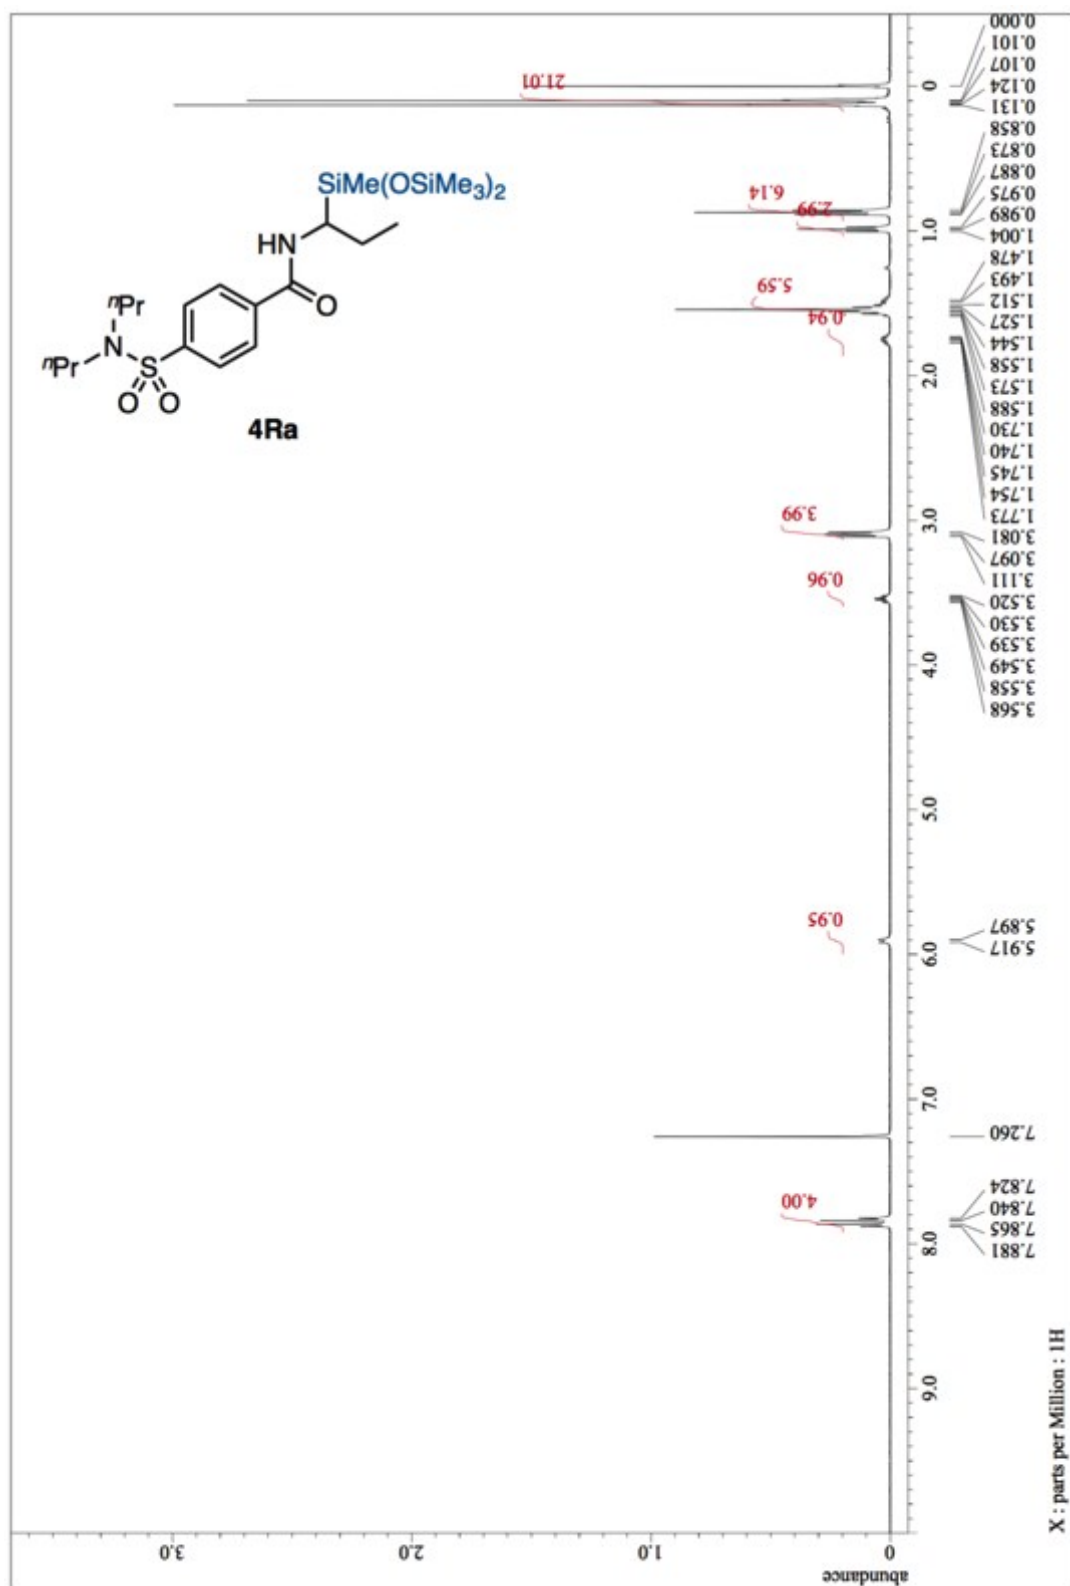

$^{13}\text{C}$  NMR (151MHz,  $\text{CDCl}_3$ ) of 4Ra

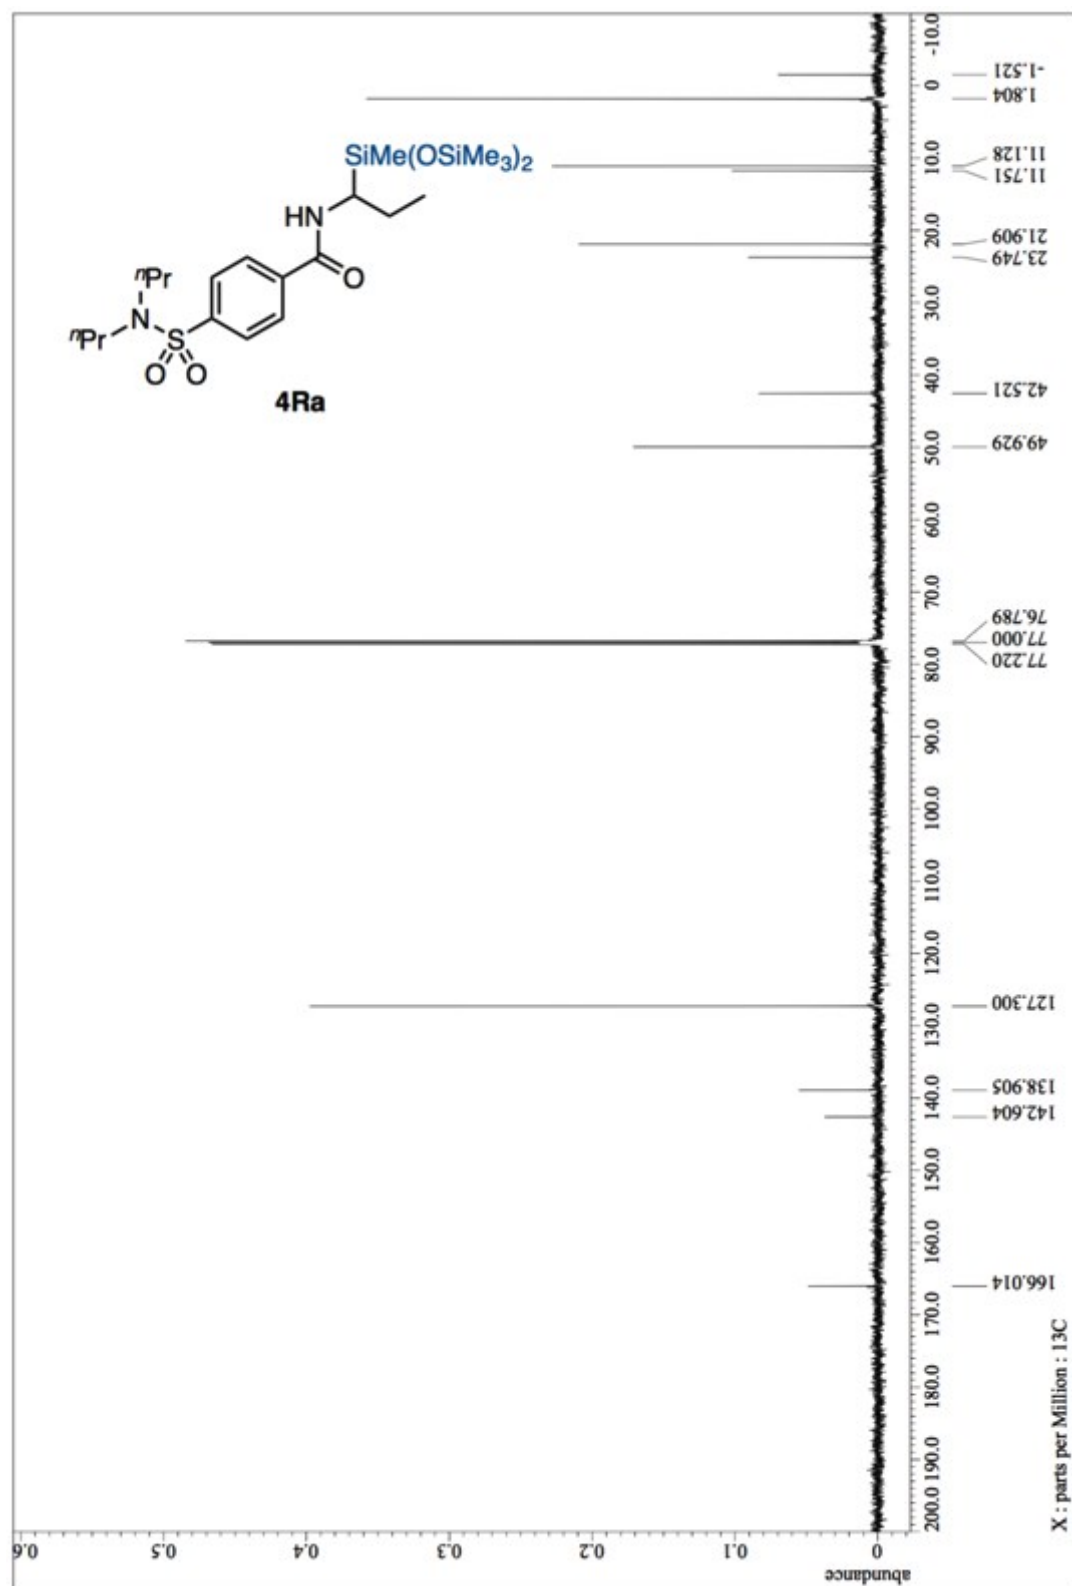



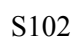

$^1\text{H}$  NMR (600MHz, 120 °C, DMSO- $d_6$ ) of 4Ta

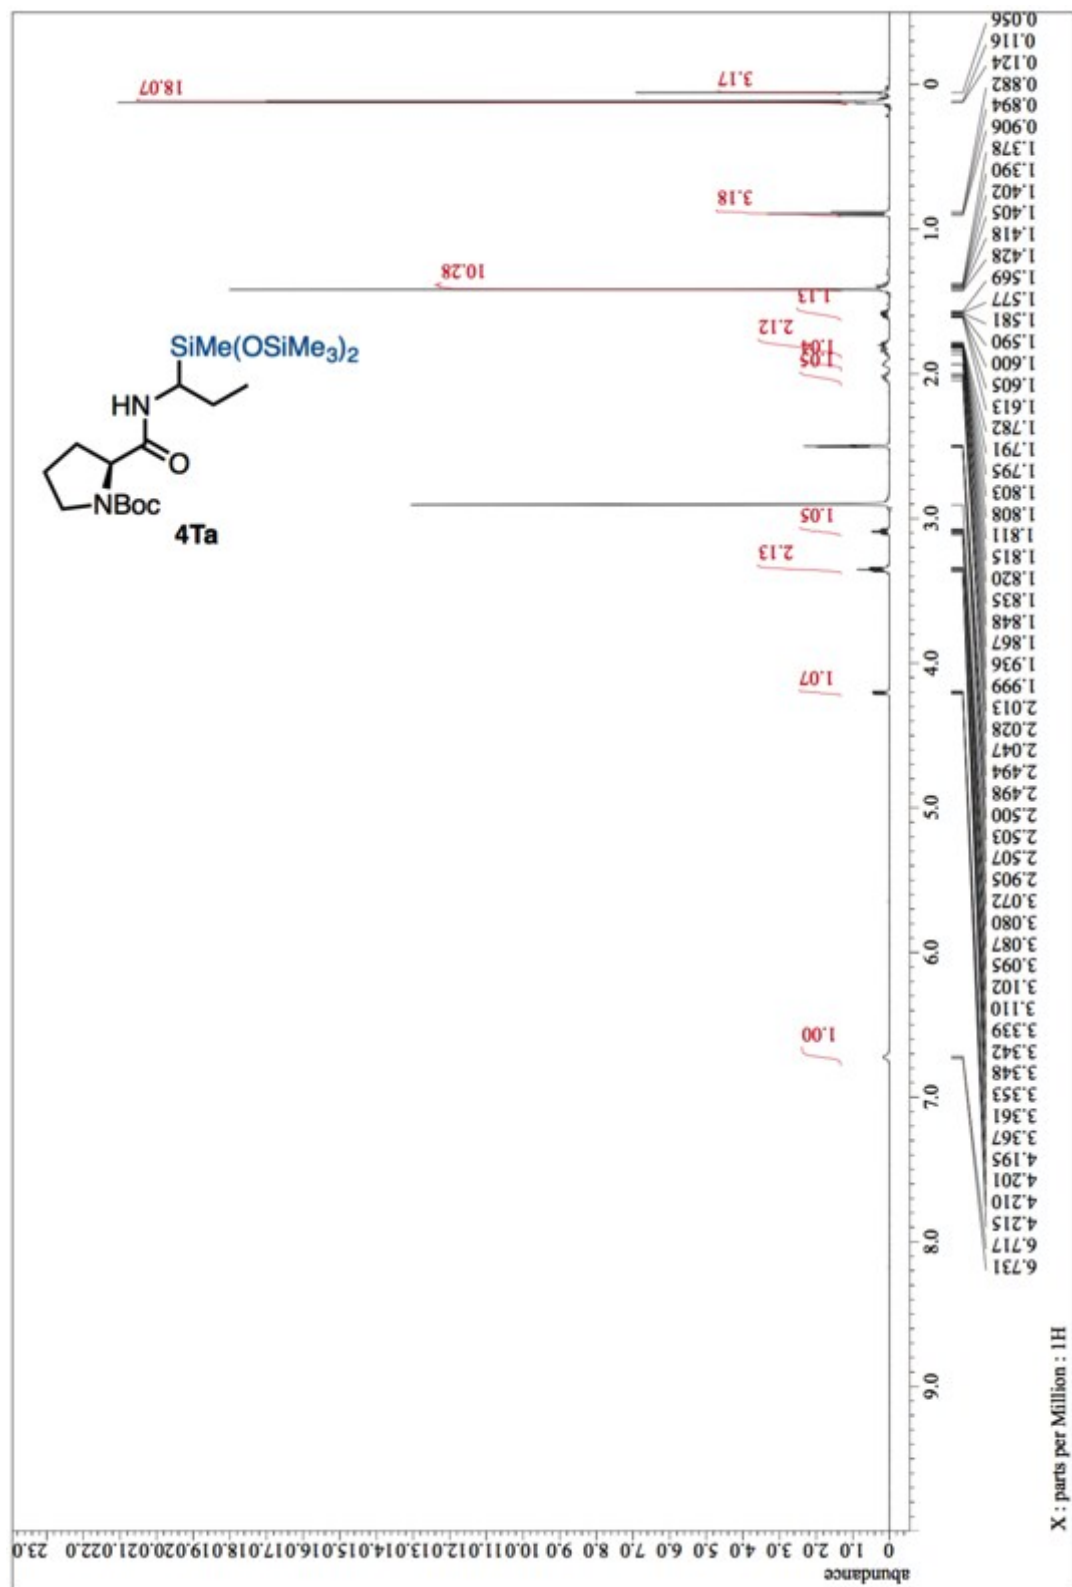

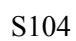



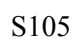

$^{13}\text{C}$  NMR (151MHz, 120 °C,  $\text{DMSO-}d_6$ ) of diastereomer-4Ta

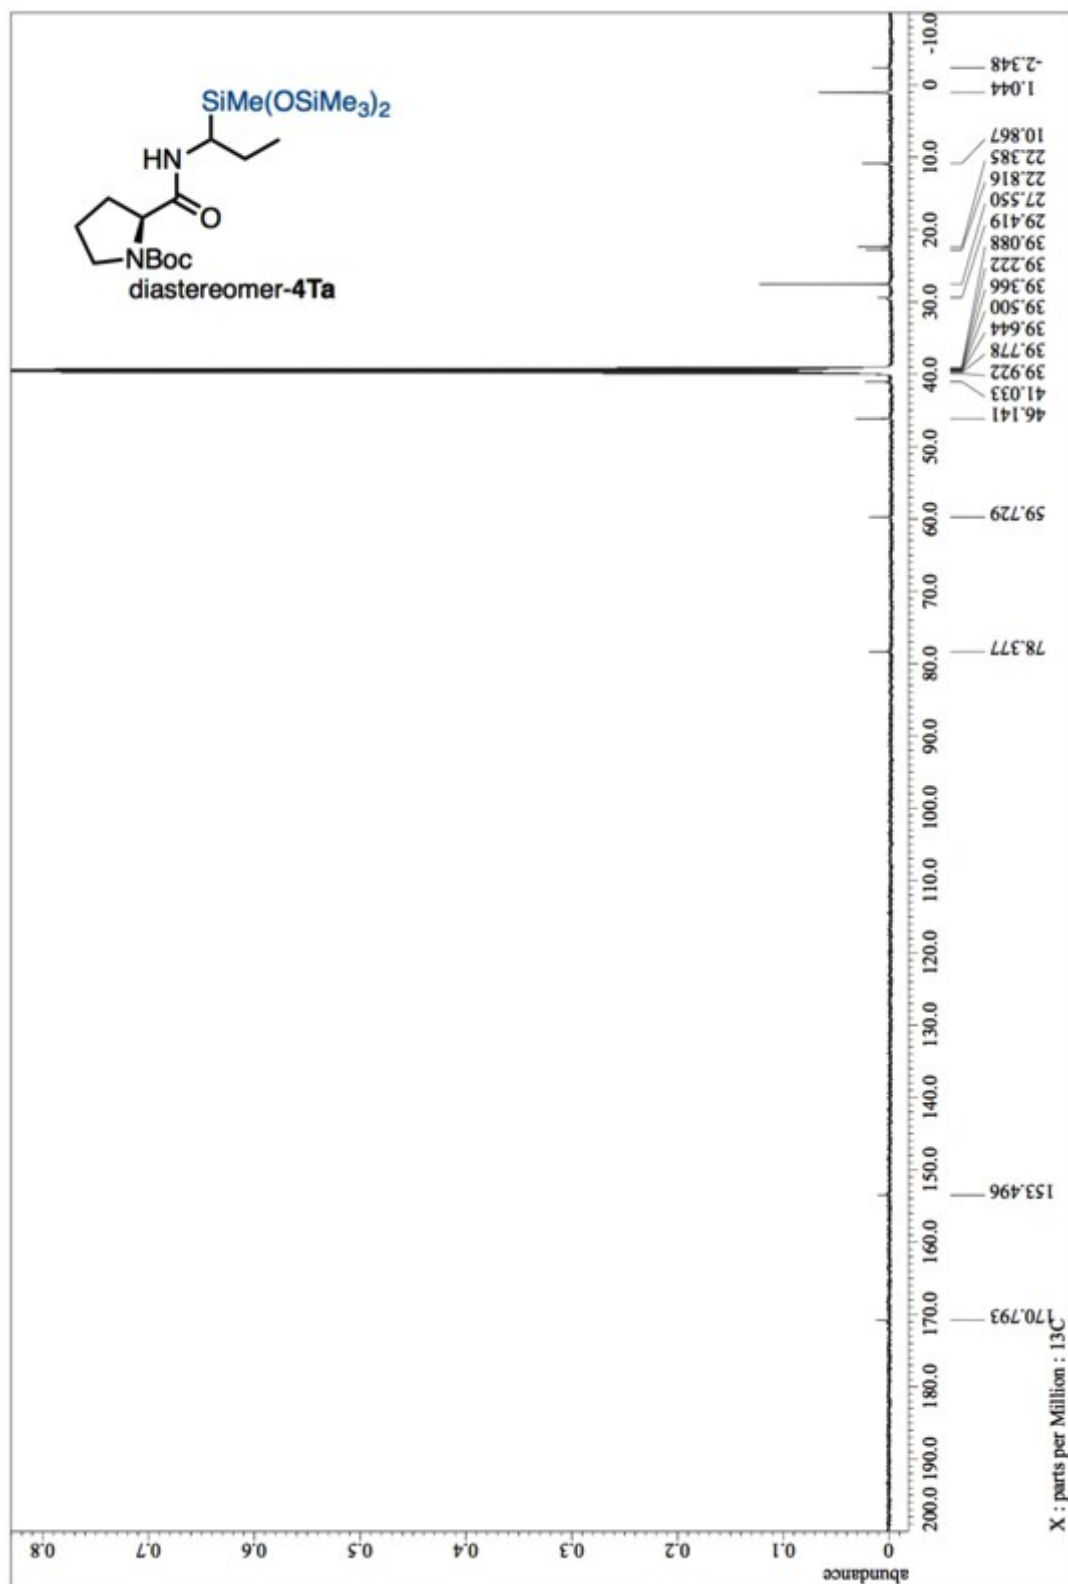

<sup>1</sup>H NMR (600MHz, CDCl<sub>3</sub>) of 4Ab

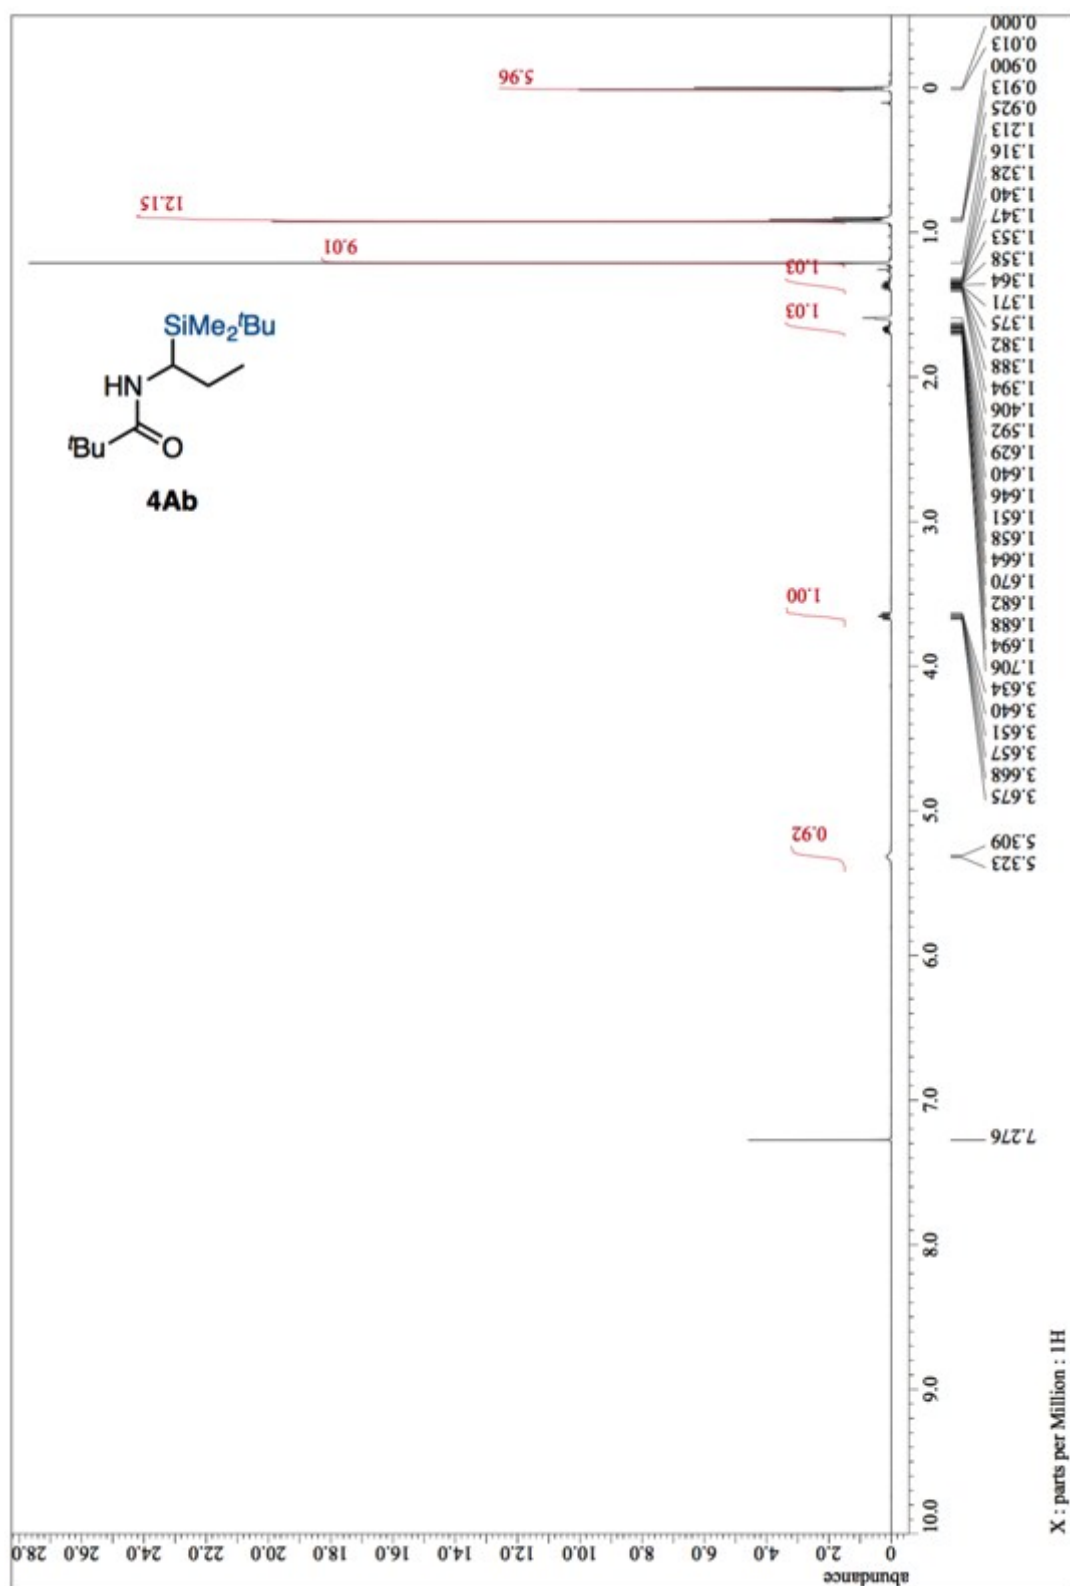

$^{13}\text{C}$  NMR (151MHz,  $\text{CDCl}_3$ ) of 4Ab

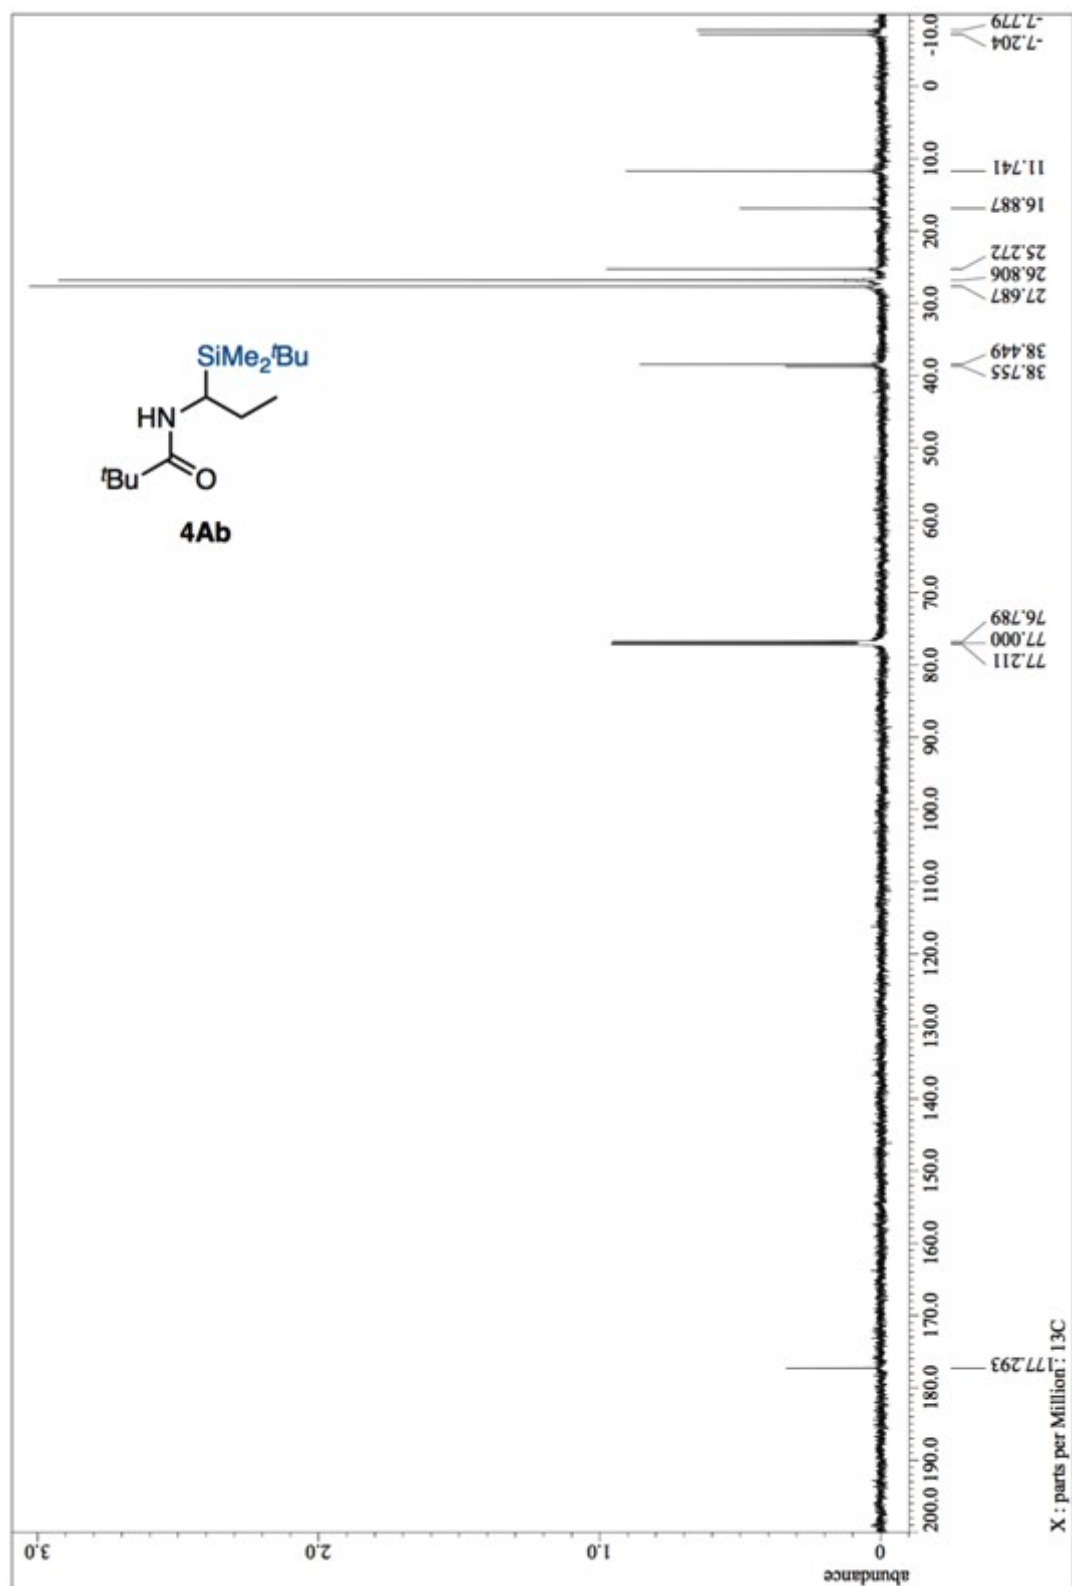



$^{13}\text{C}$  NMR (151MHz,  $\text{CDCl}_3$ ) of 4Ac

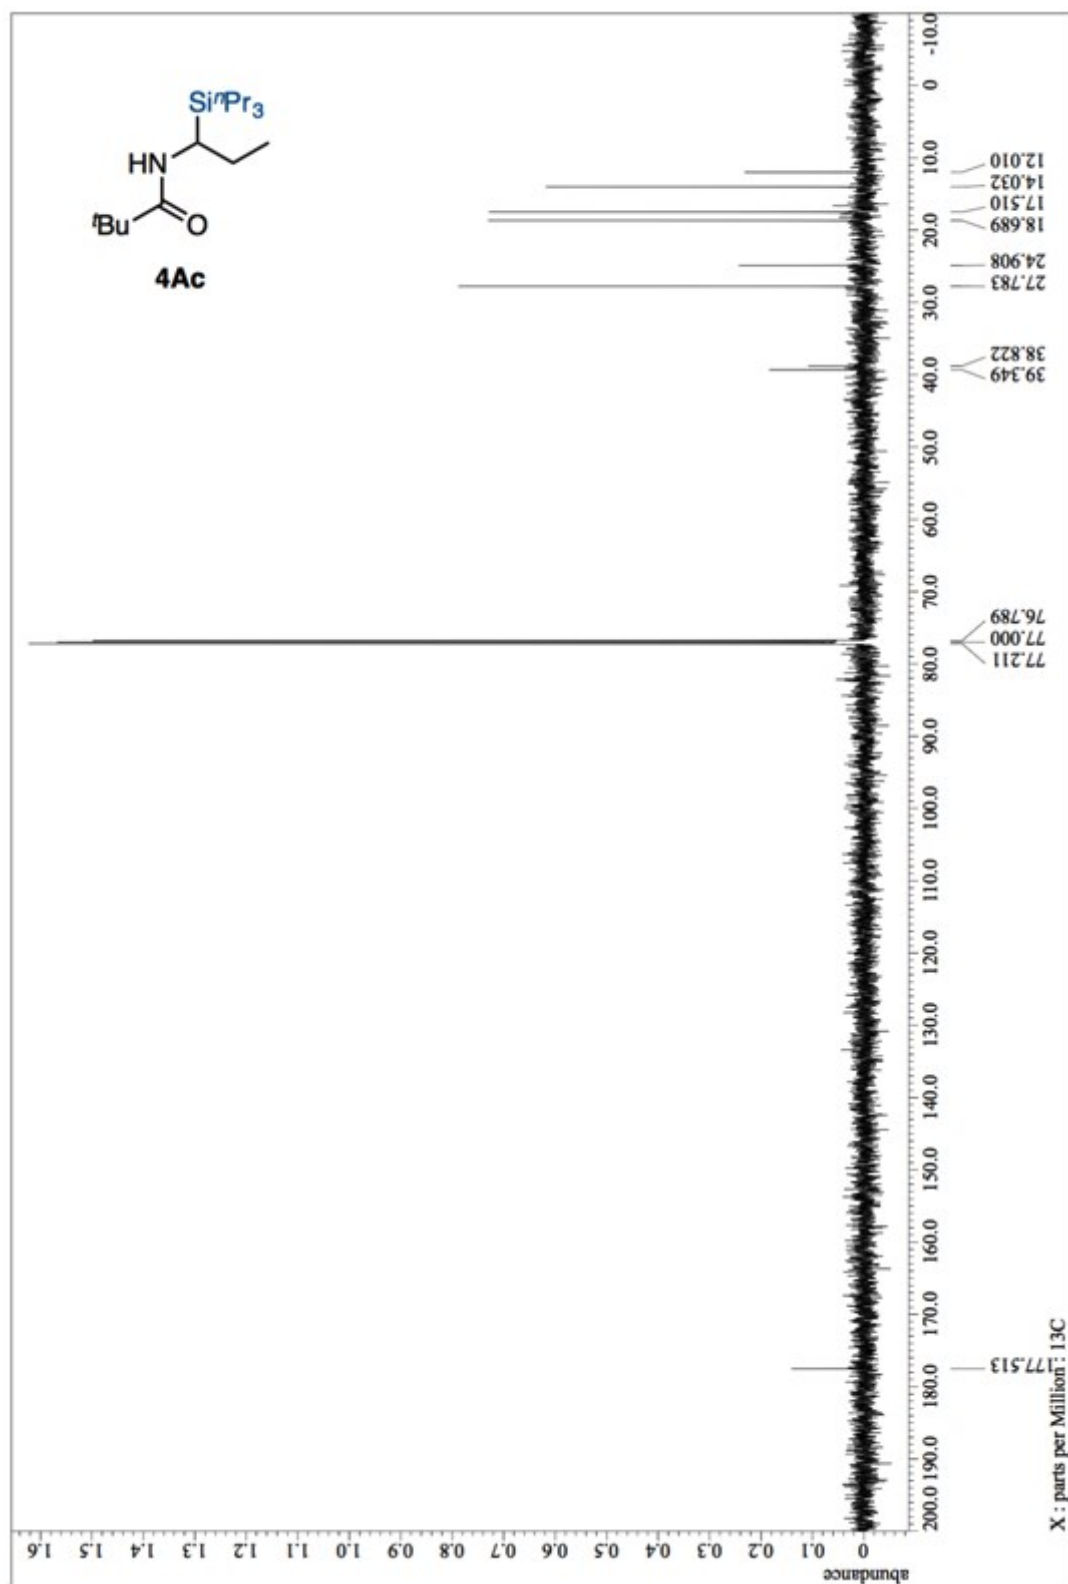

<sup>1</sup>H NMR (600MHz, CDCl<sub>3</sub>) of 4Ad

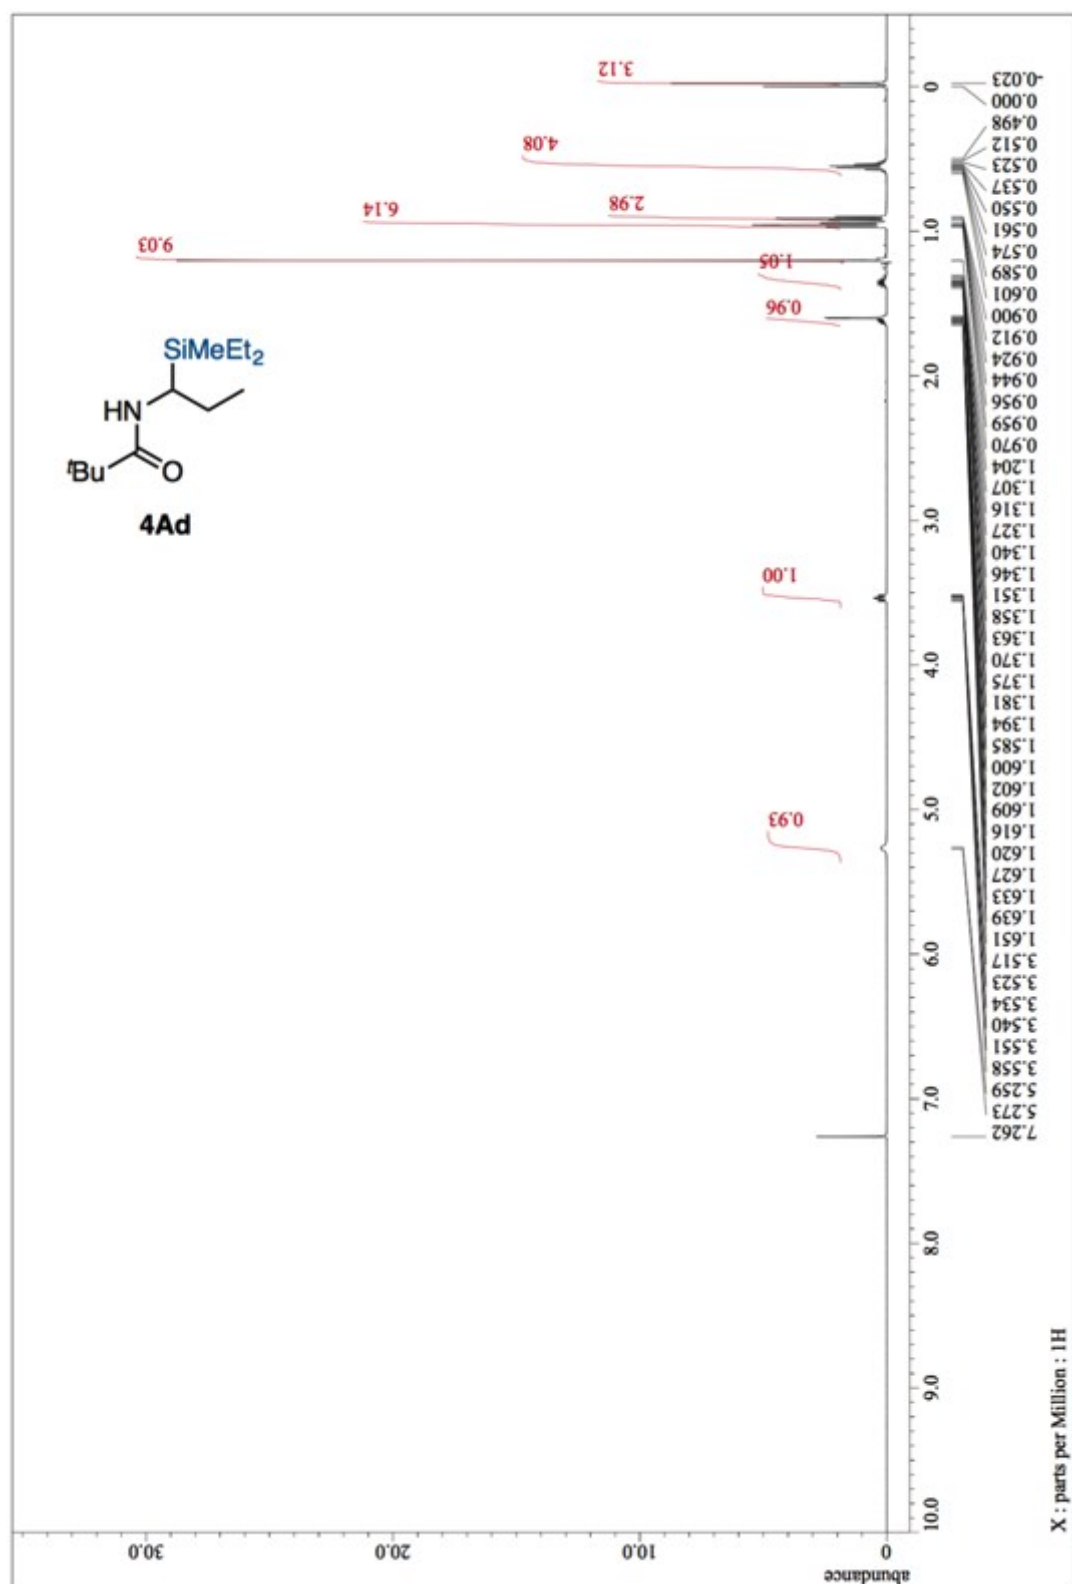

$^{13}\text{C}$  NMR (151MHz,  $\text{CDCl}_3$ ) of 4Ad

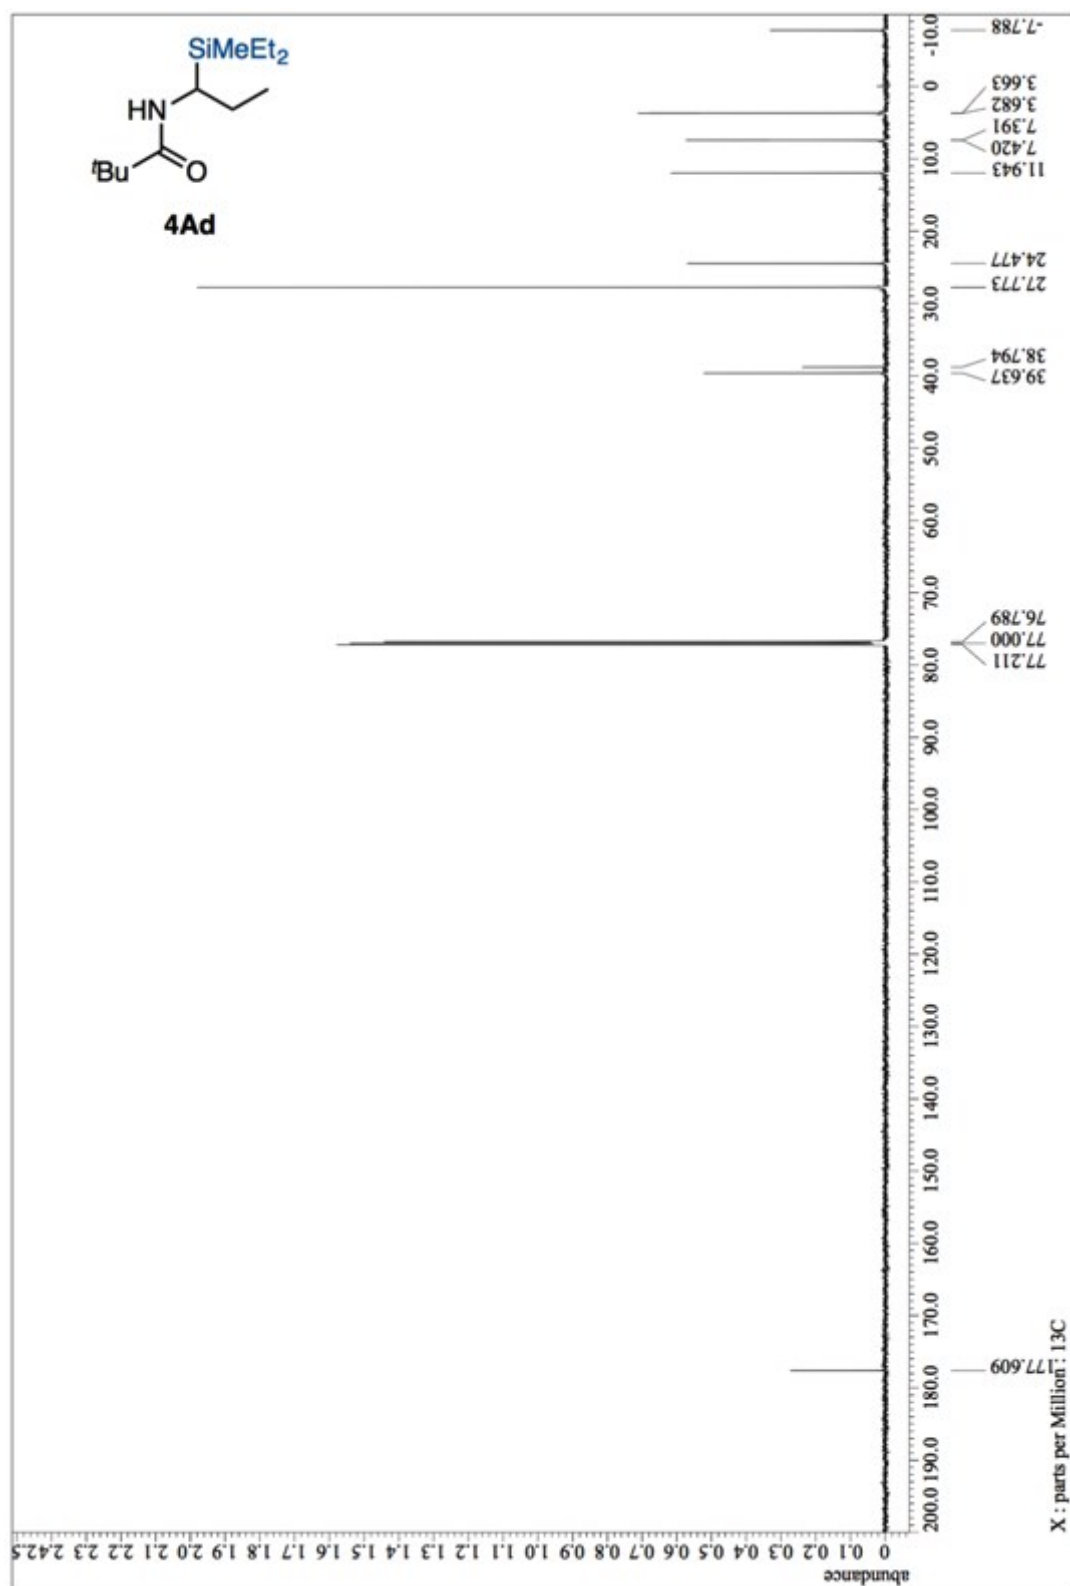



$^1\text{H}$  NMR (600MHz,  $\text{CDCl}_3$ ) of 4Ae

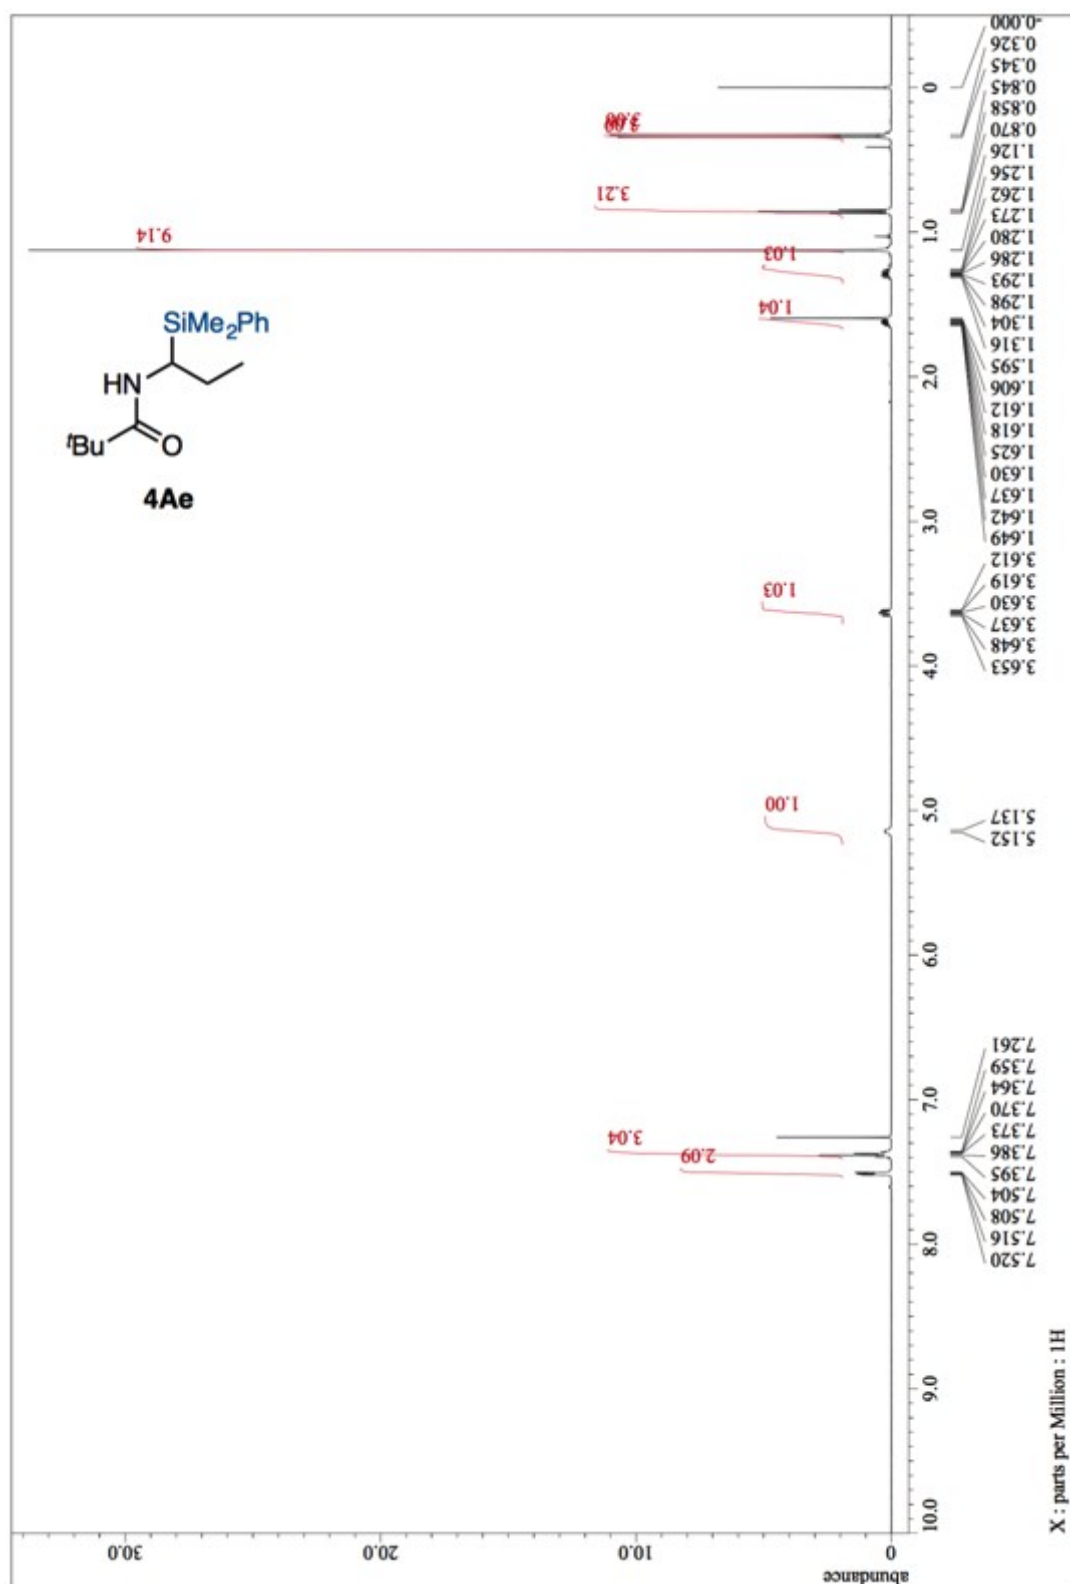

$^{13}\text{C}$  NMR (151MHz,  $\text{CDCl}_3$ ) of 4Ae

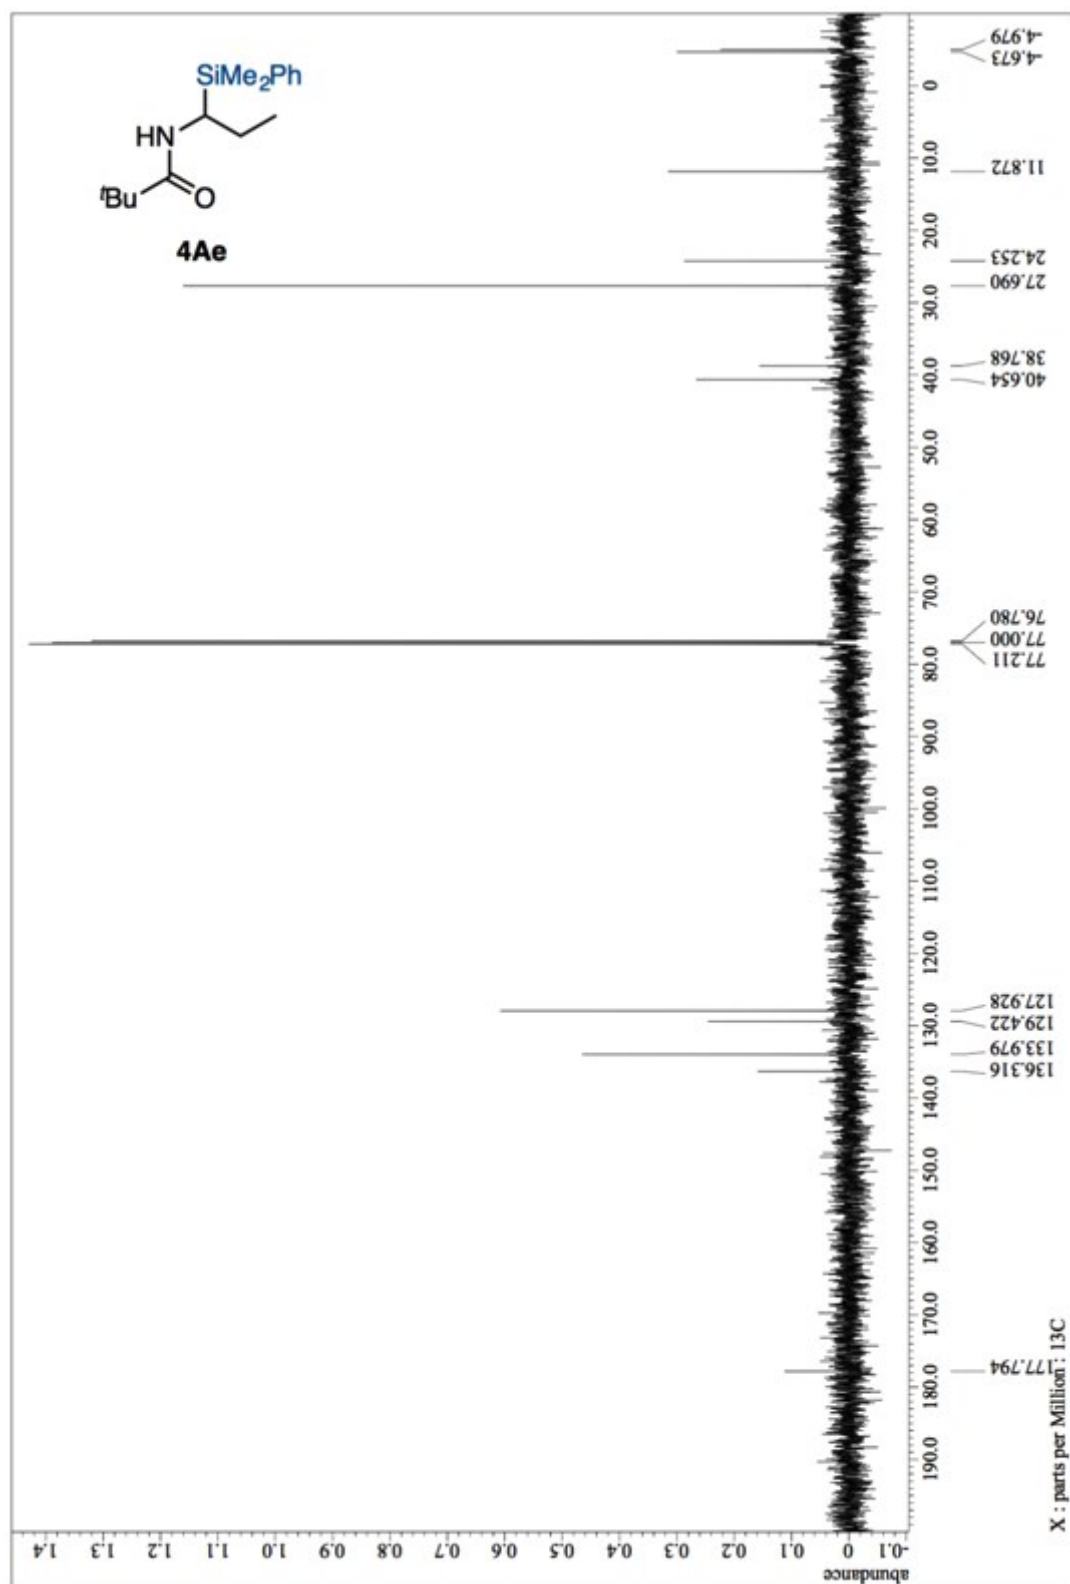

<sup>1</sup>H NMR (600MHz, CDCl<sub>3</sub>) of 3Aa

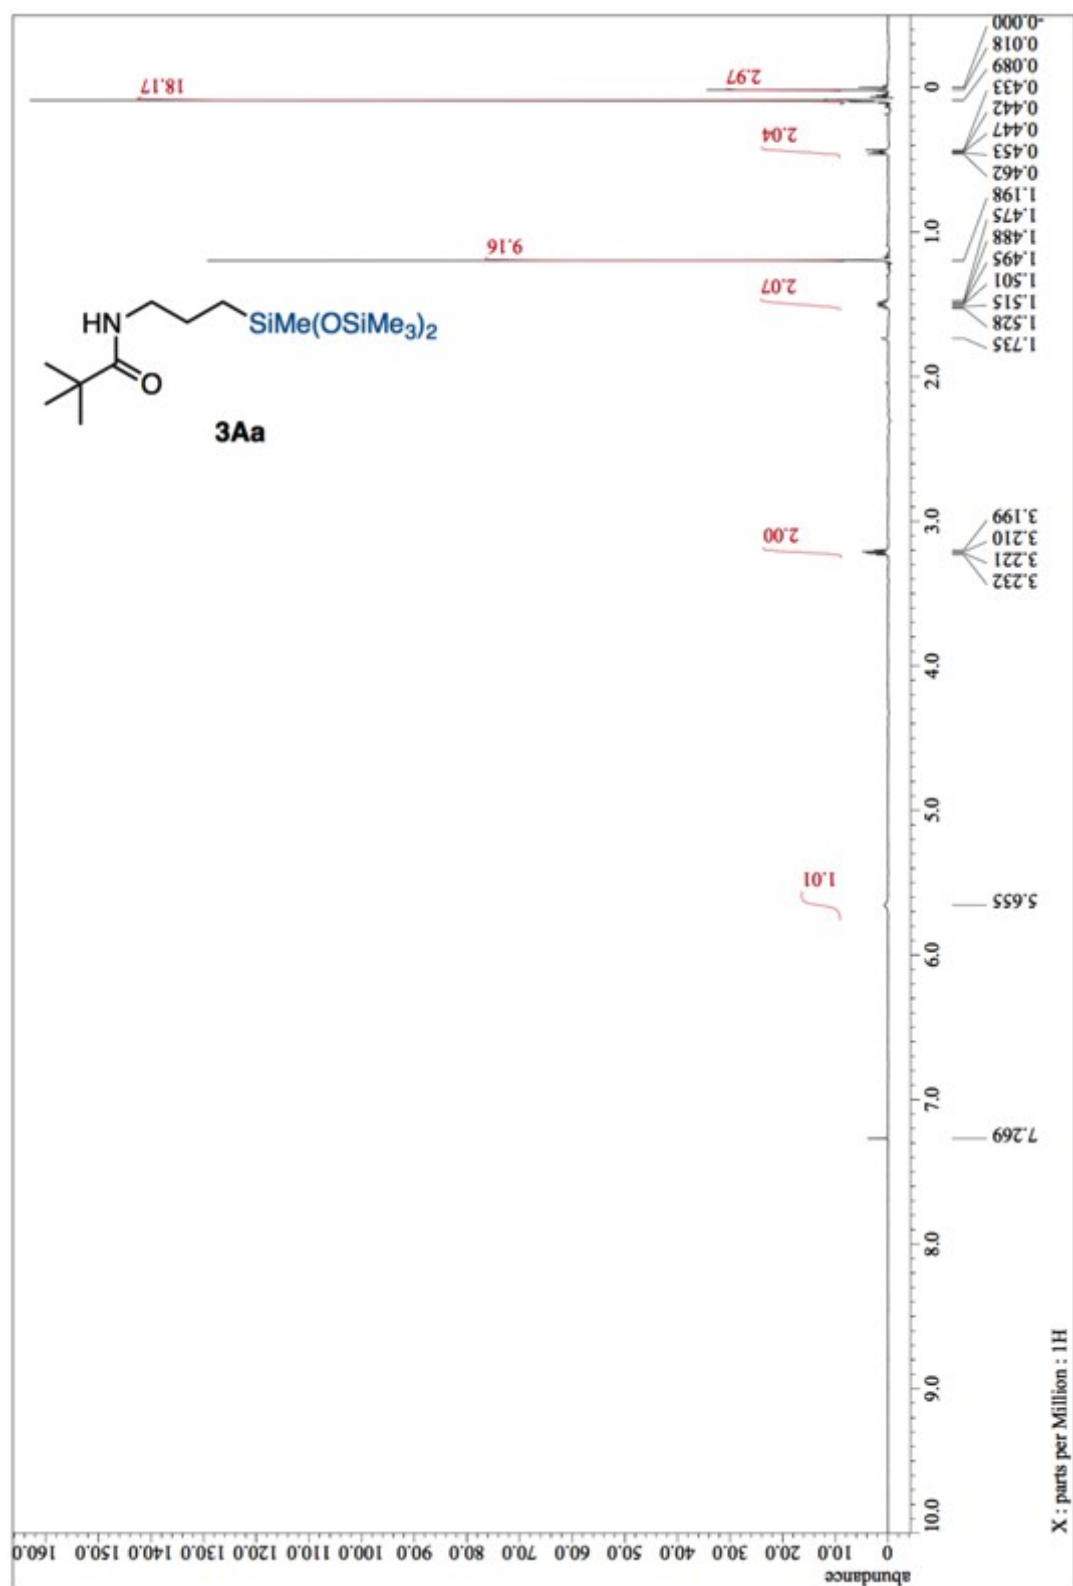

$^{13}\text{C}$  NMR (151MHz,  $\text{CDCl}_3$ ) of 3Aa

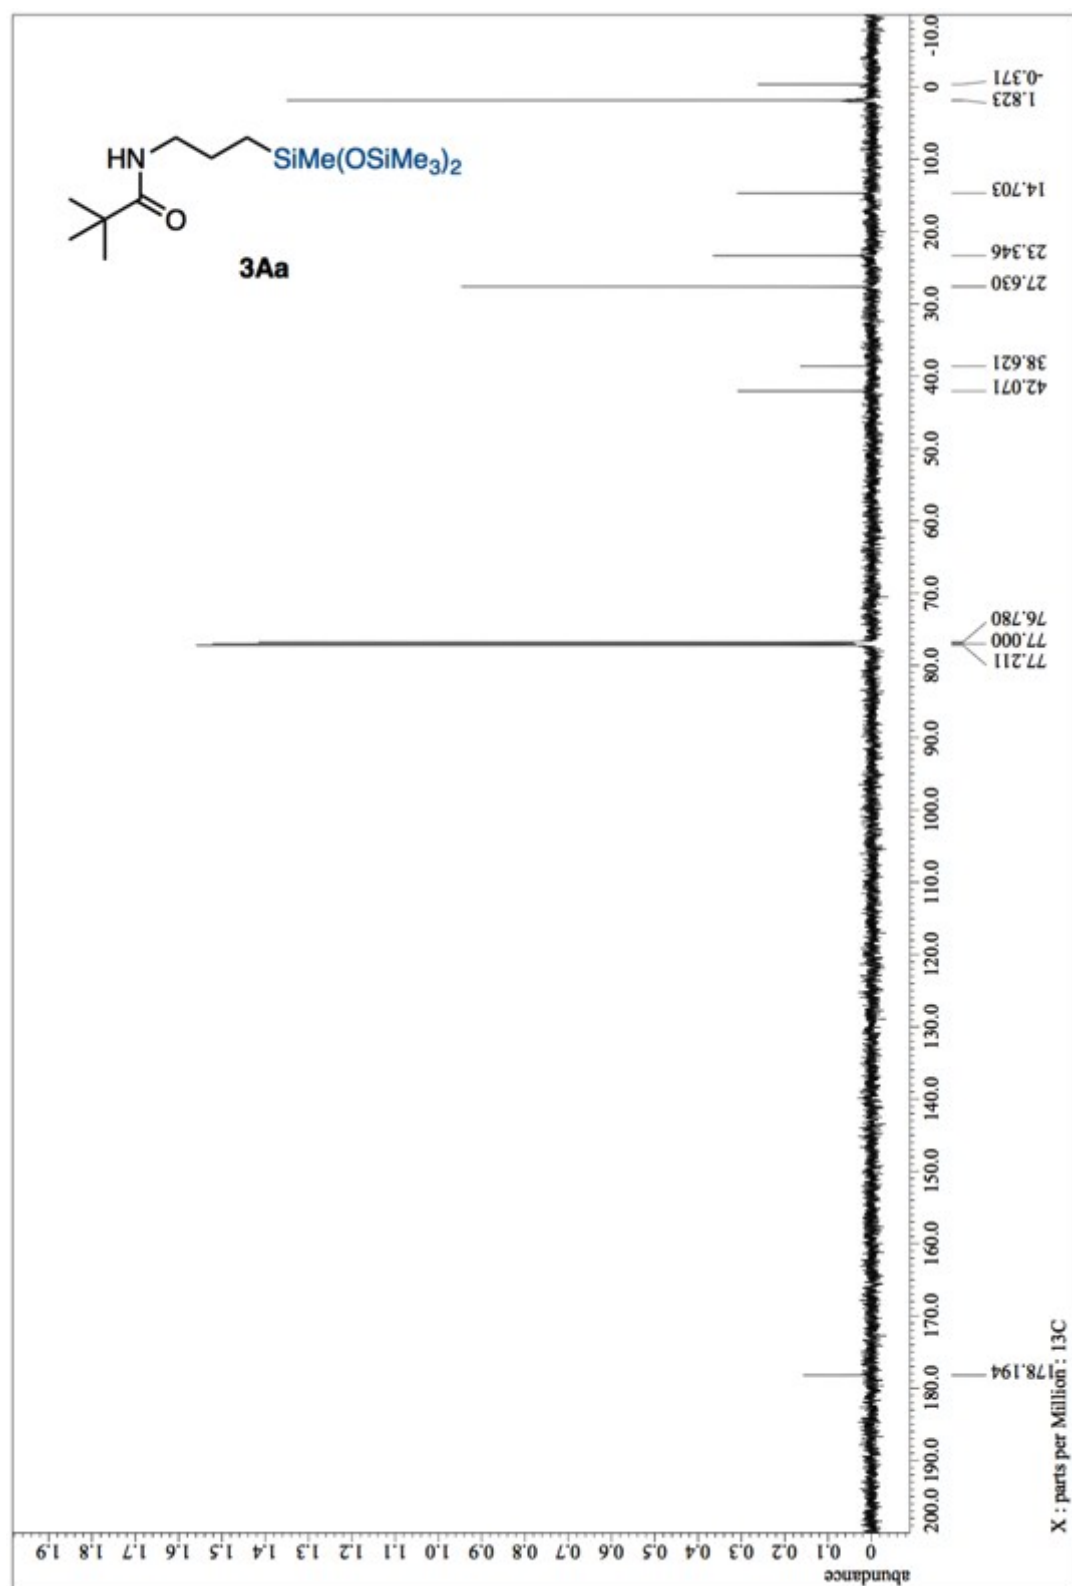

<sup>1</sup>H NMR (600MHz, CDCl<sub>3</sub>) of 3Ba

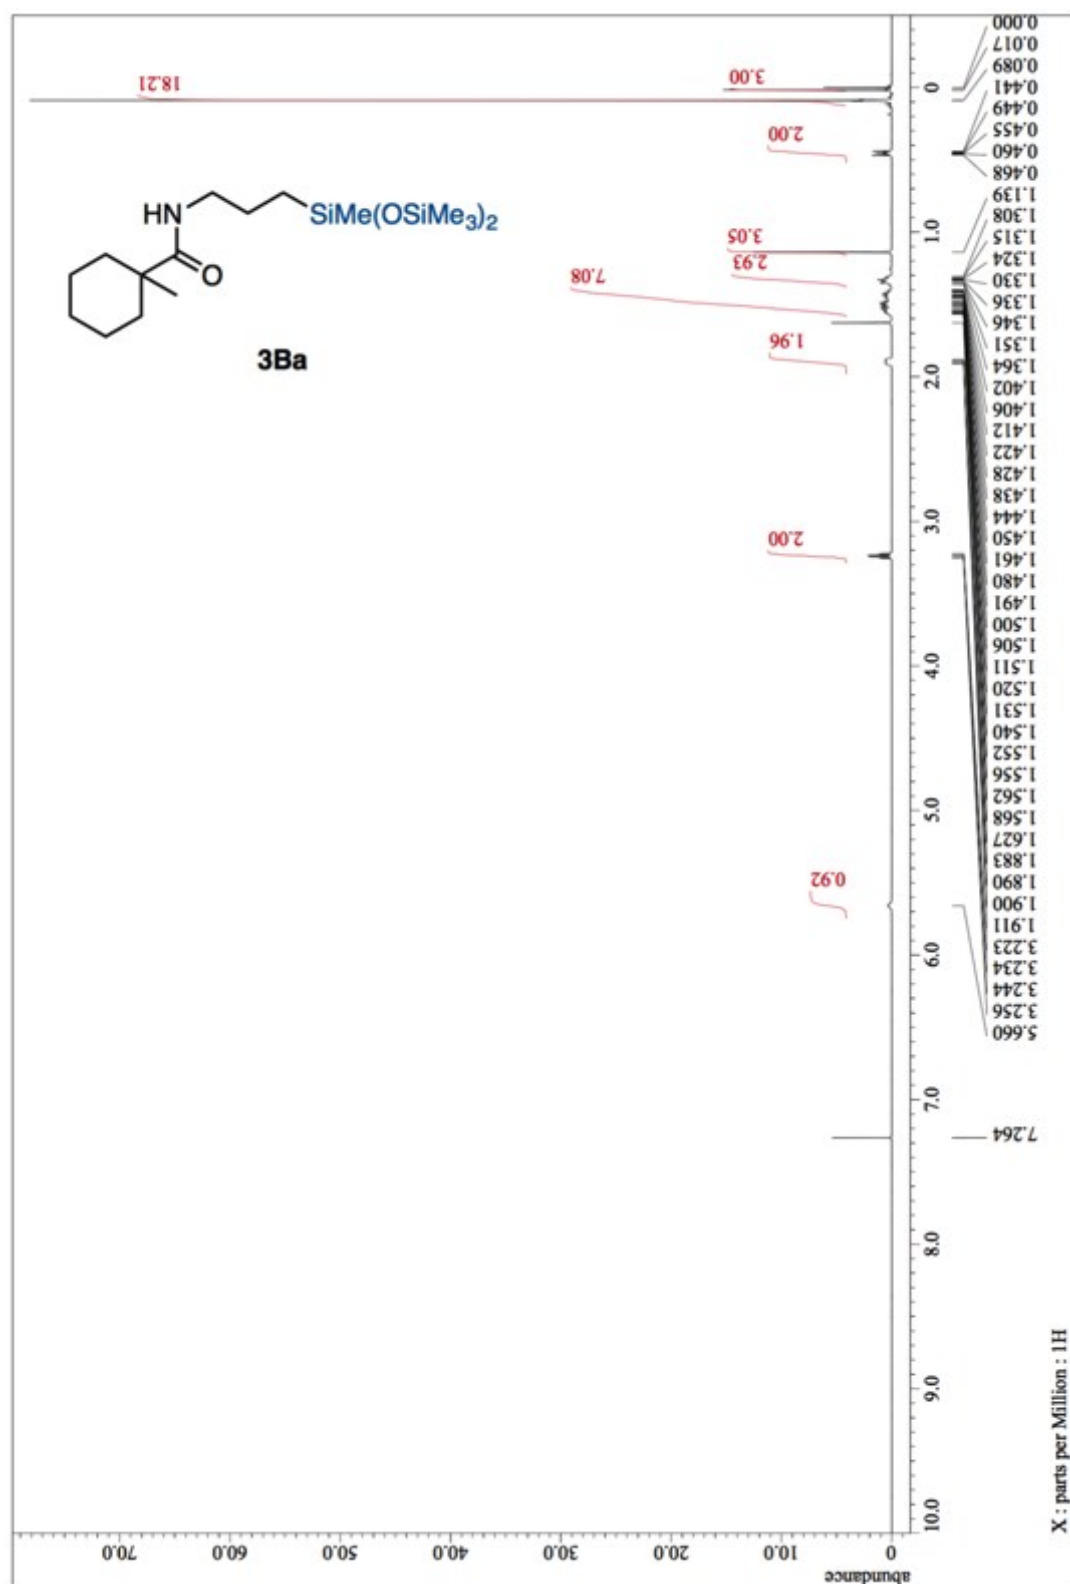

$^{13}\text{C}$  NMR (151MHz,  $\text{CDCl}_3$ ) of 3Ba

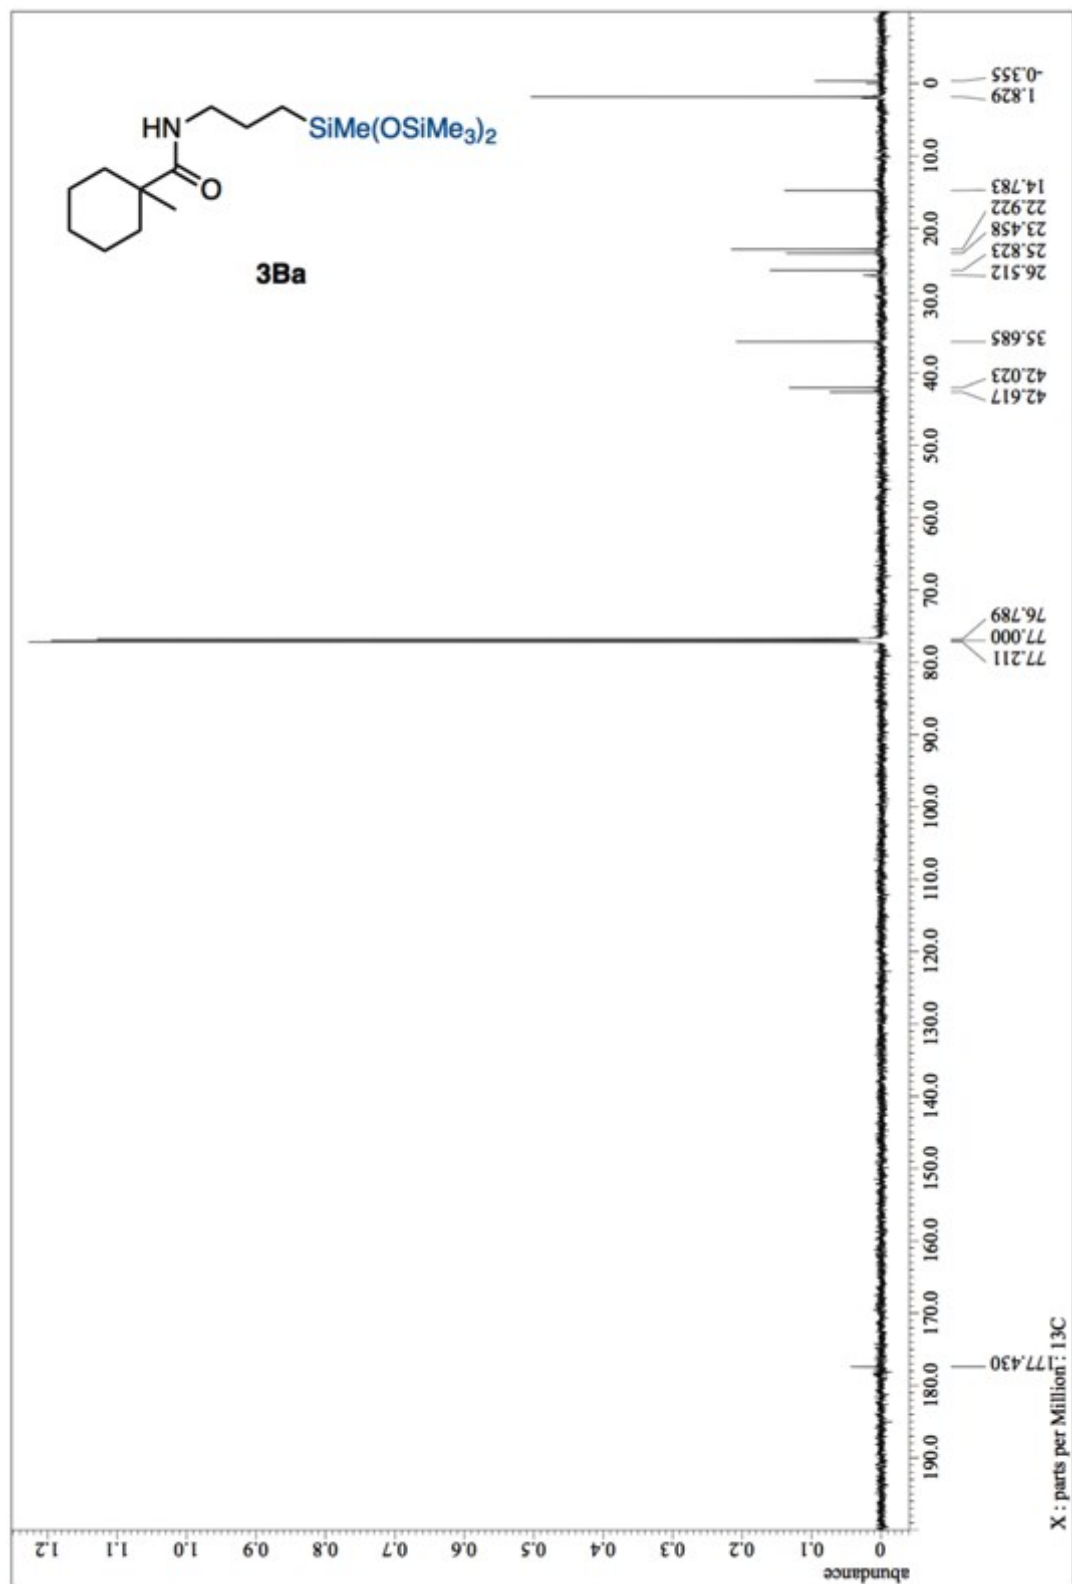

<sup>1</sup>H NMR (600MHz, CDCl<sub>3</sub>) of 3Ma

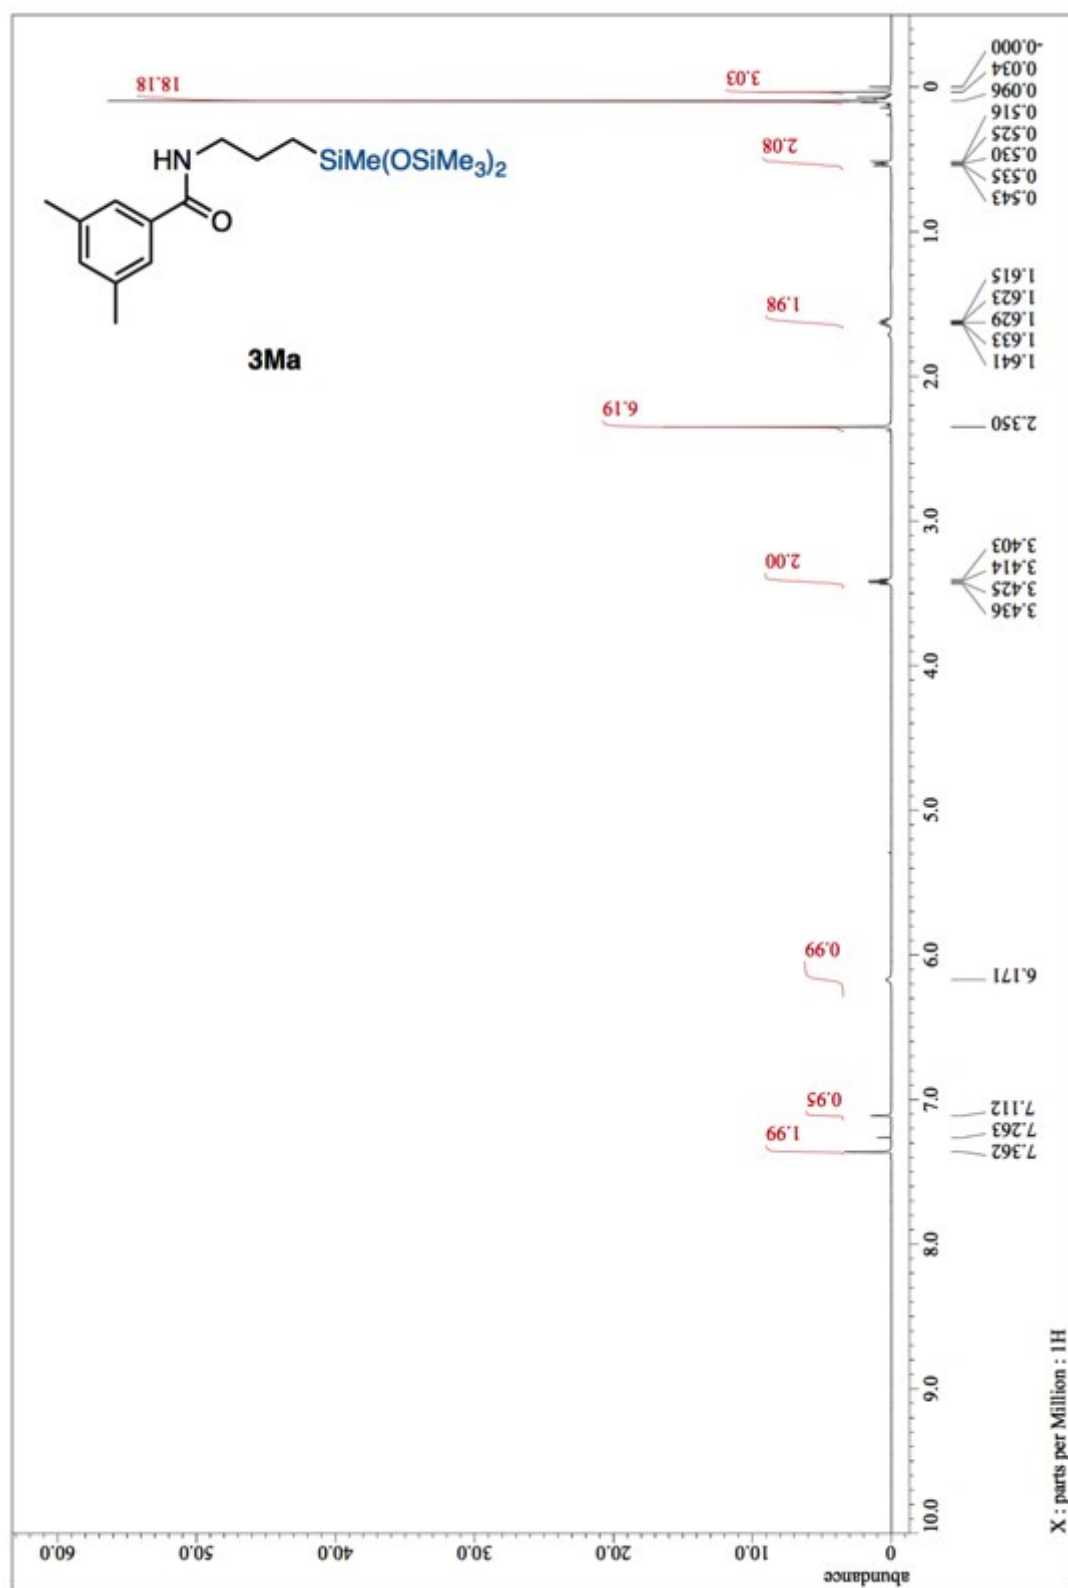

$^{13}\text{C}$  NMR (151MHz,  $\text{CDCl}_3$ ) of 3Ma

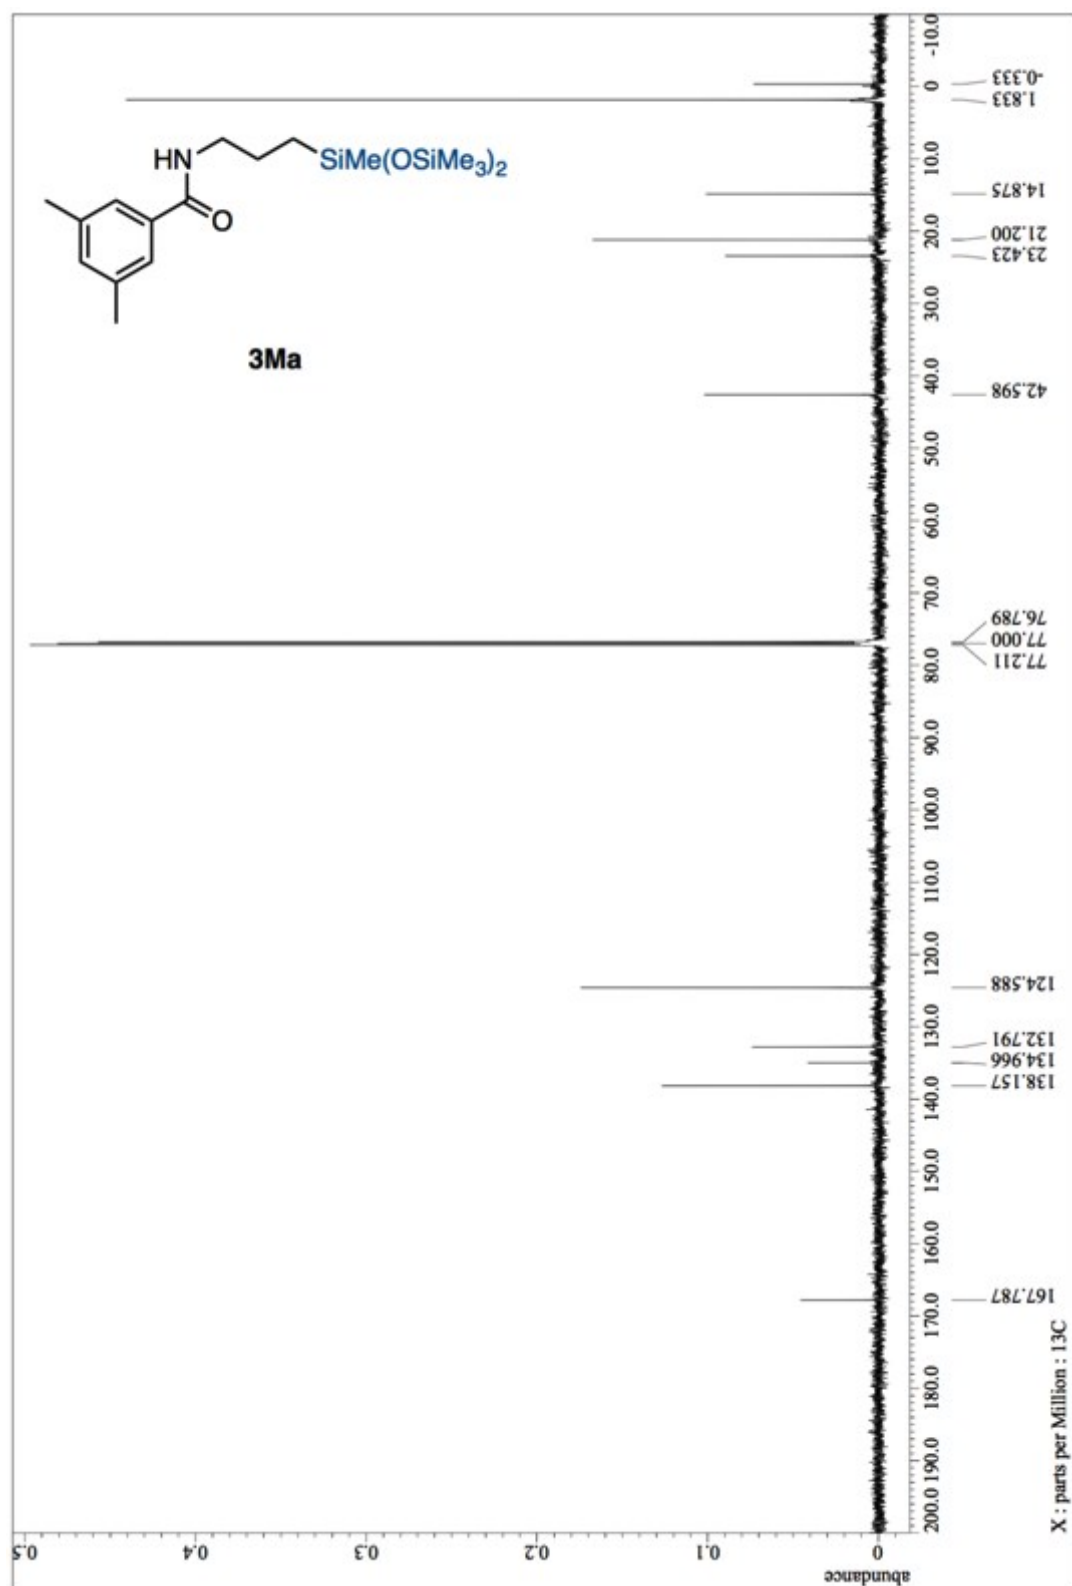



$^1\text{H}$  NMR (600MHz,  $\text{CDCl}_3$ ) of **3Na**

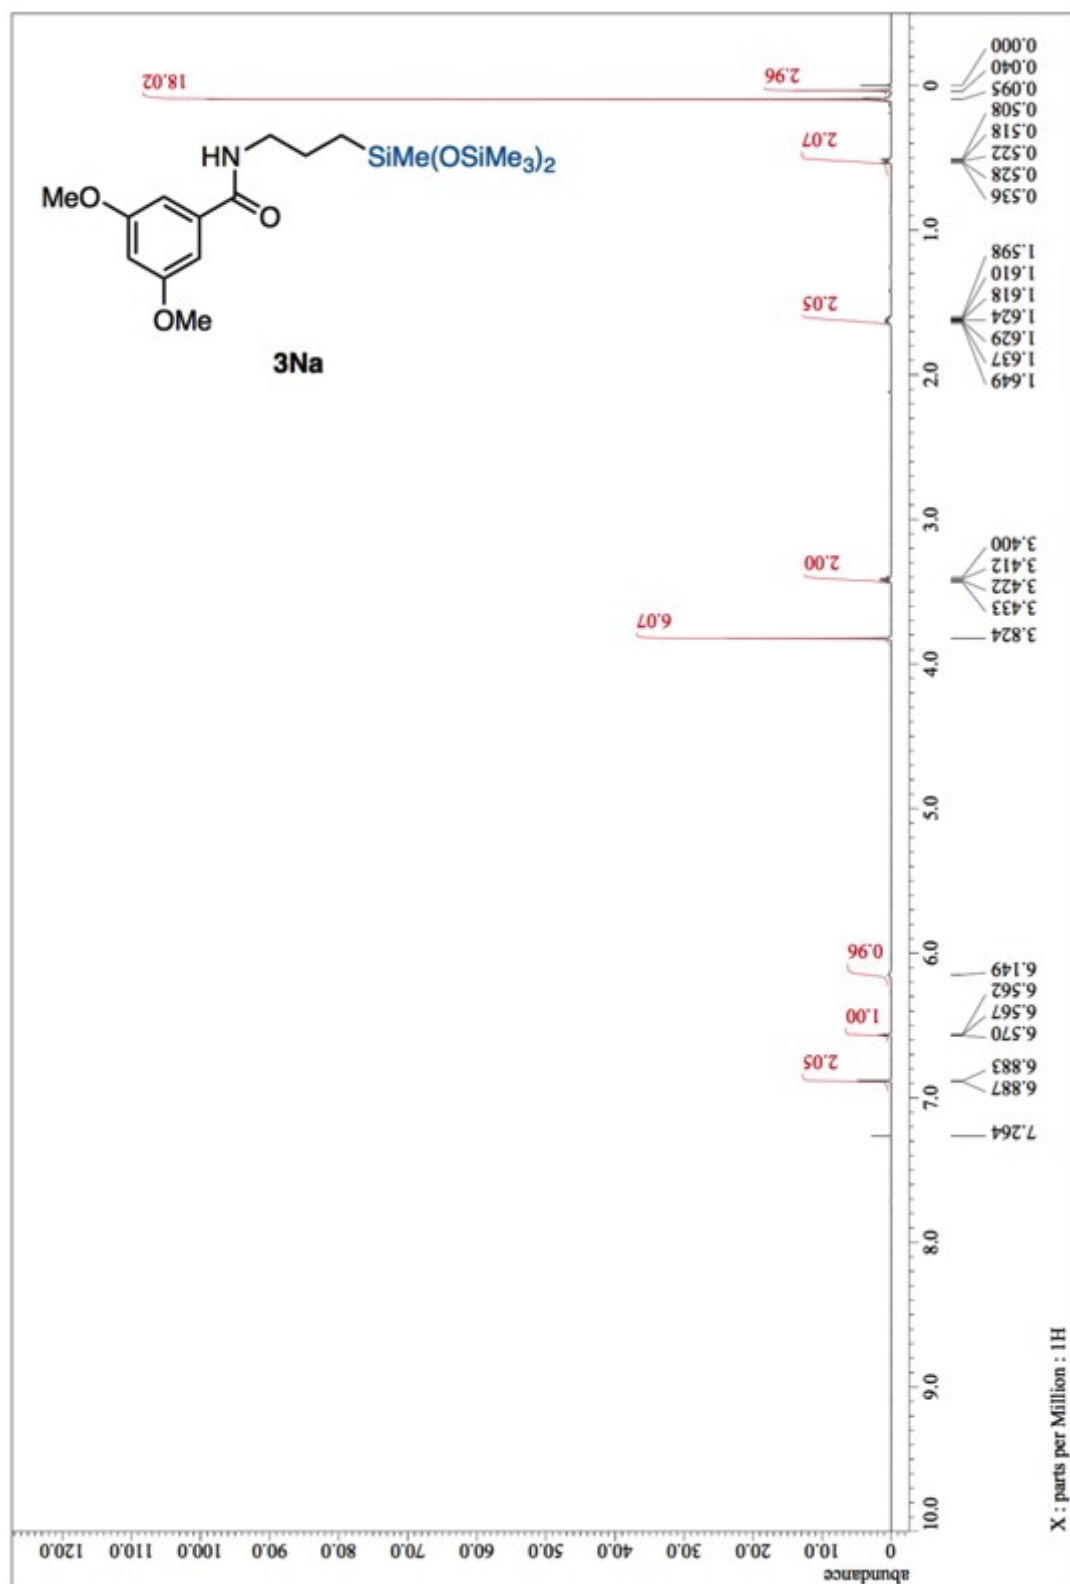

$^{13}\text{C}$  NMR (151MHz,  $\text{CDCl}_3$ ) of **3Na**

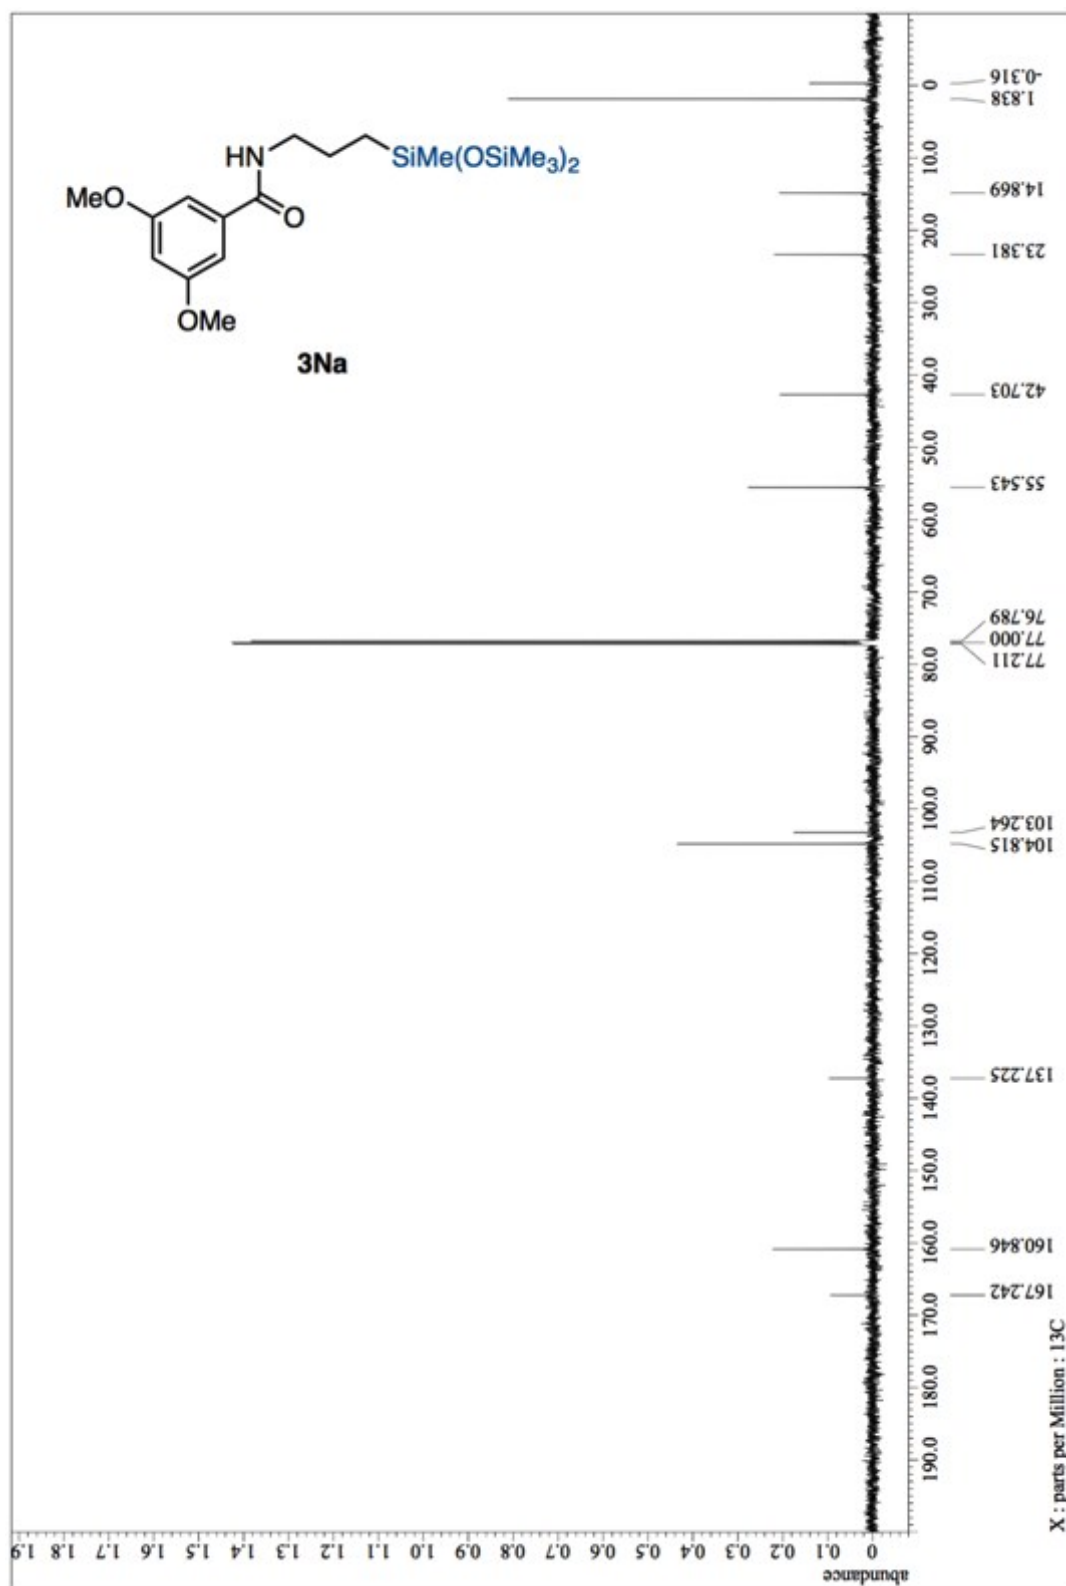

<sup>1</sup>H NMR (600MHz, CDCl<sub>3</sub>) of 3Ua

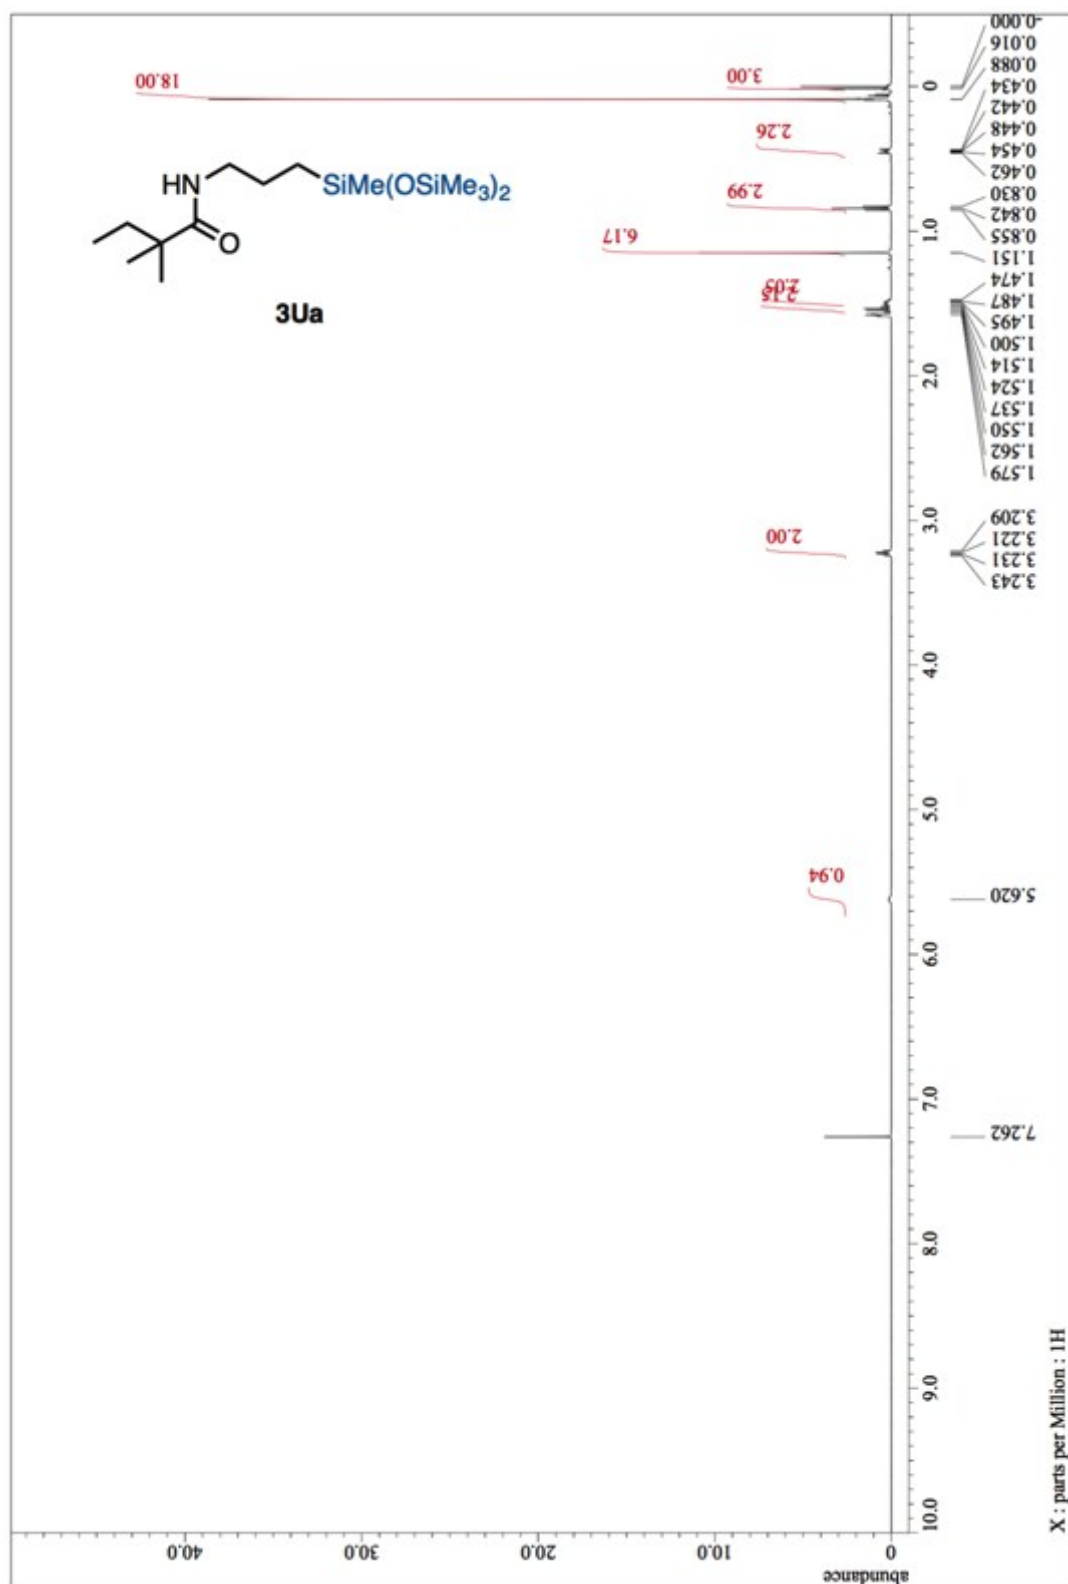



$^1\text{H}$  NMR (600MHz,  $\text{CDCl}_3$ ) of 3Va

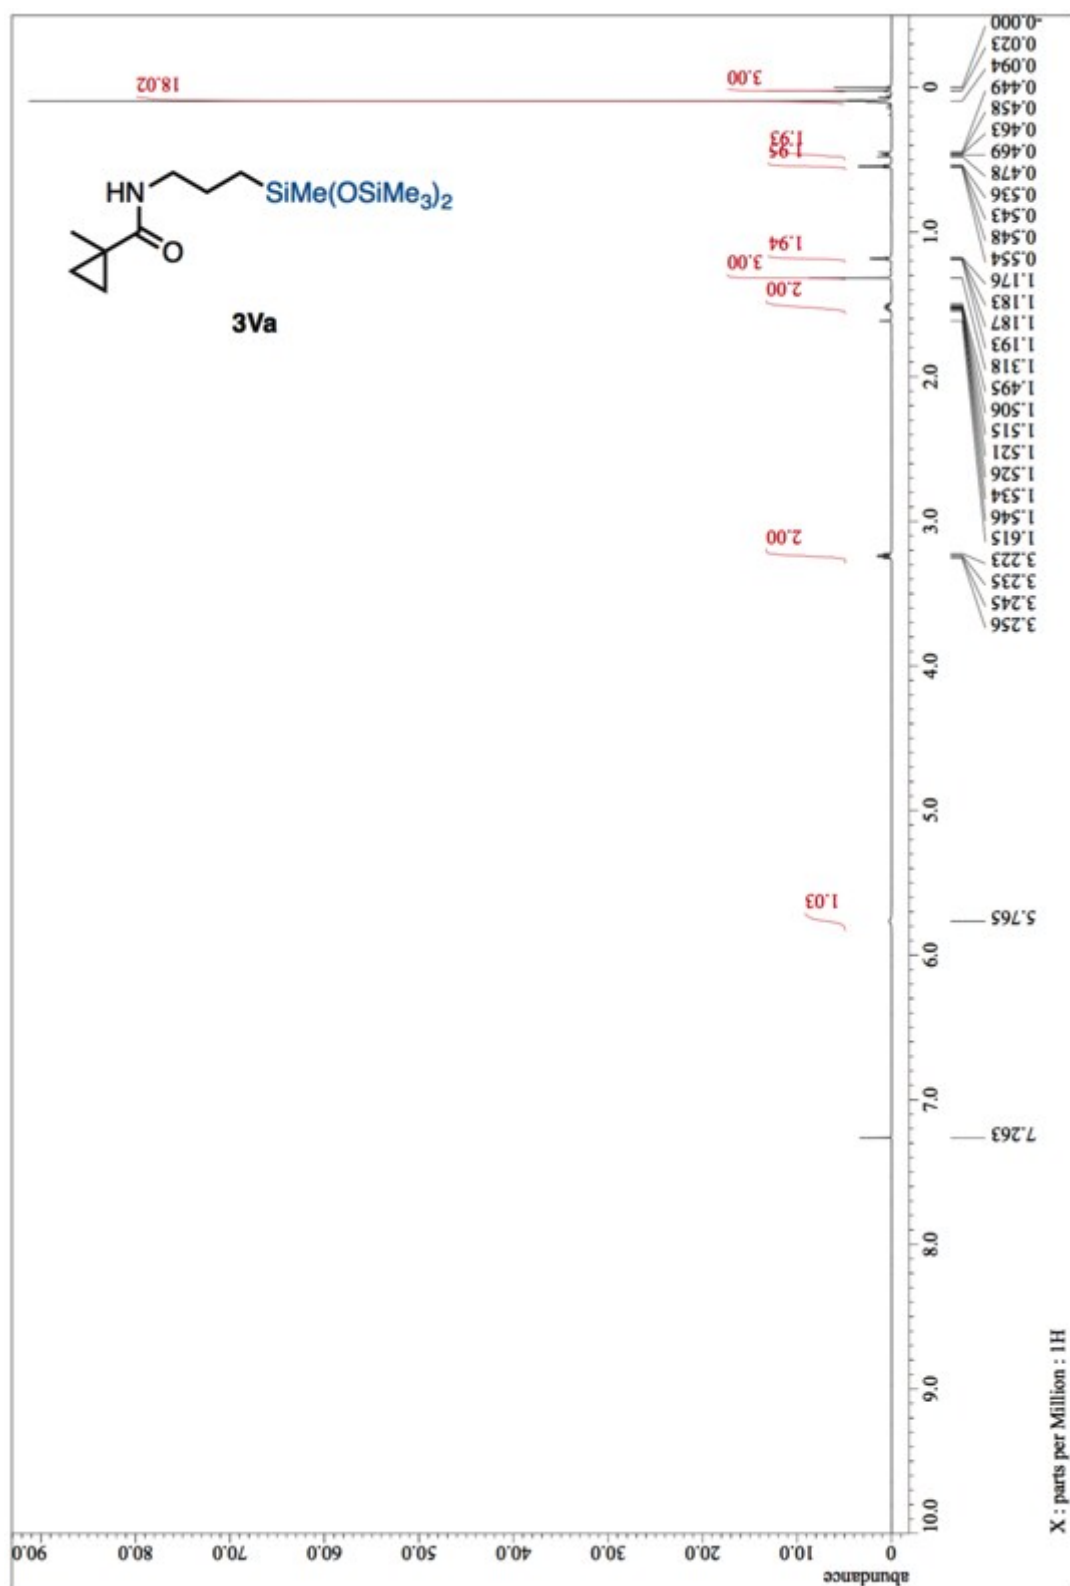

$^{13}\text{C}$  NMR (151MHz,  $\text{CDCl}_3$ ) of 3Va

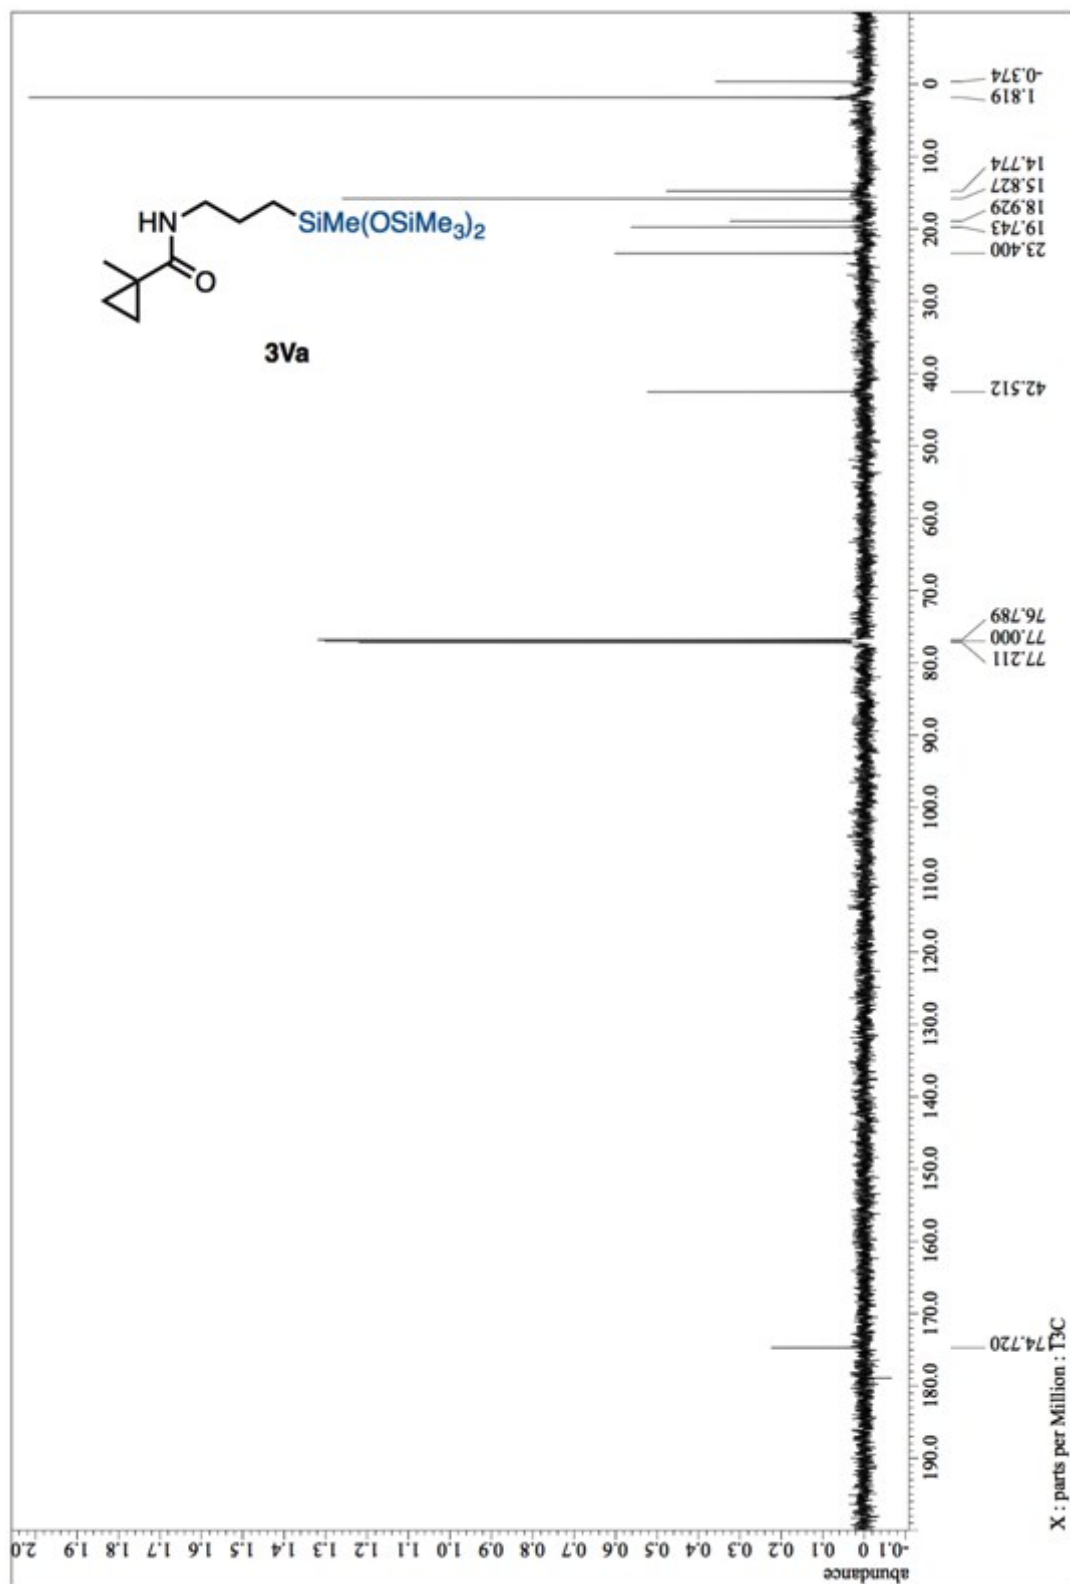

$^1\text{H}$  NMR (500MHz,  $\text{CDCl}_3$ ) of 5Ma

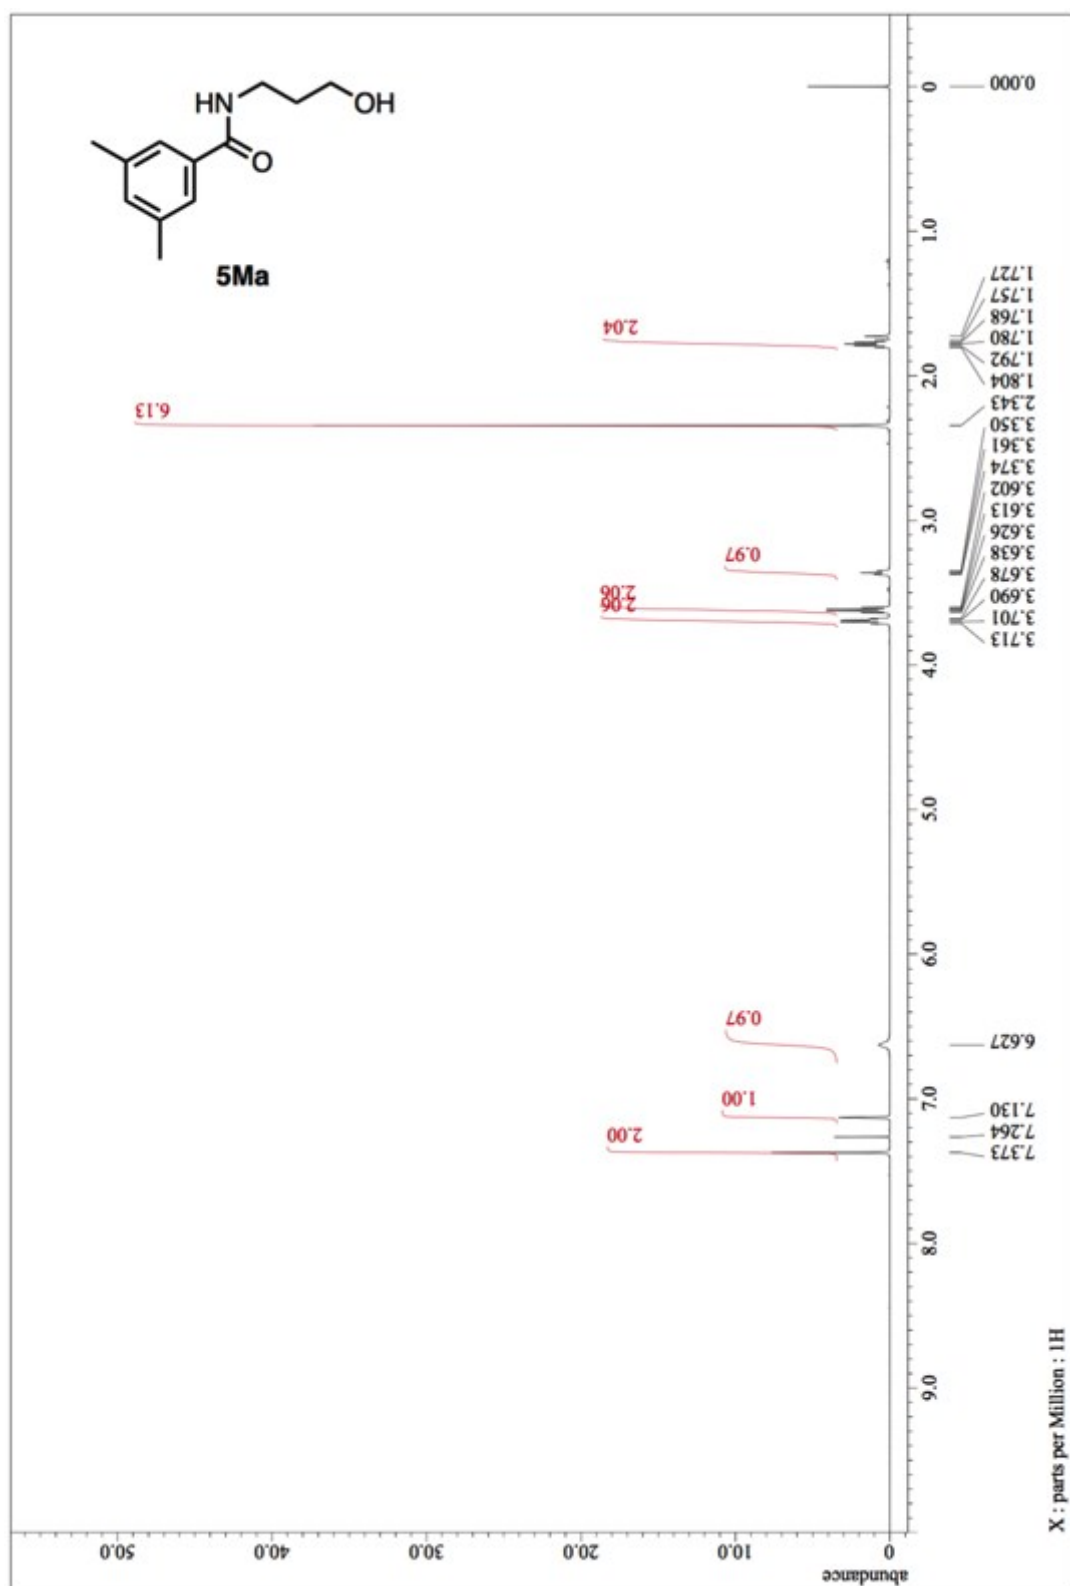

$^{13}\text{C}$  NMR (126MHz,  $\text{CDCl}_3$ ) of 5Ma

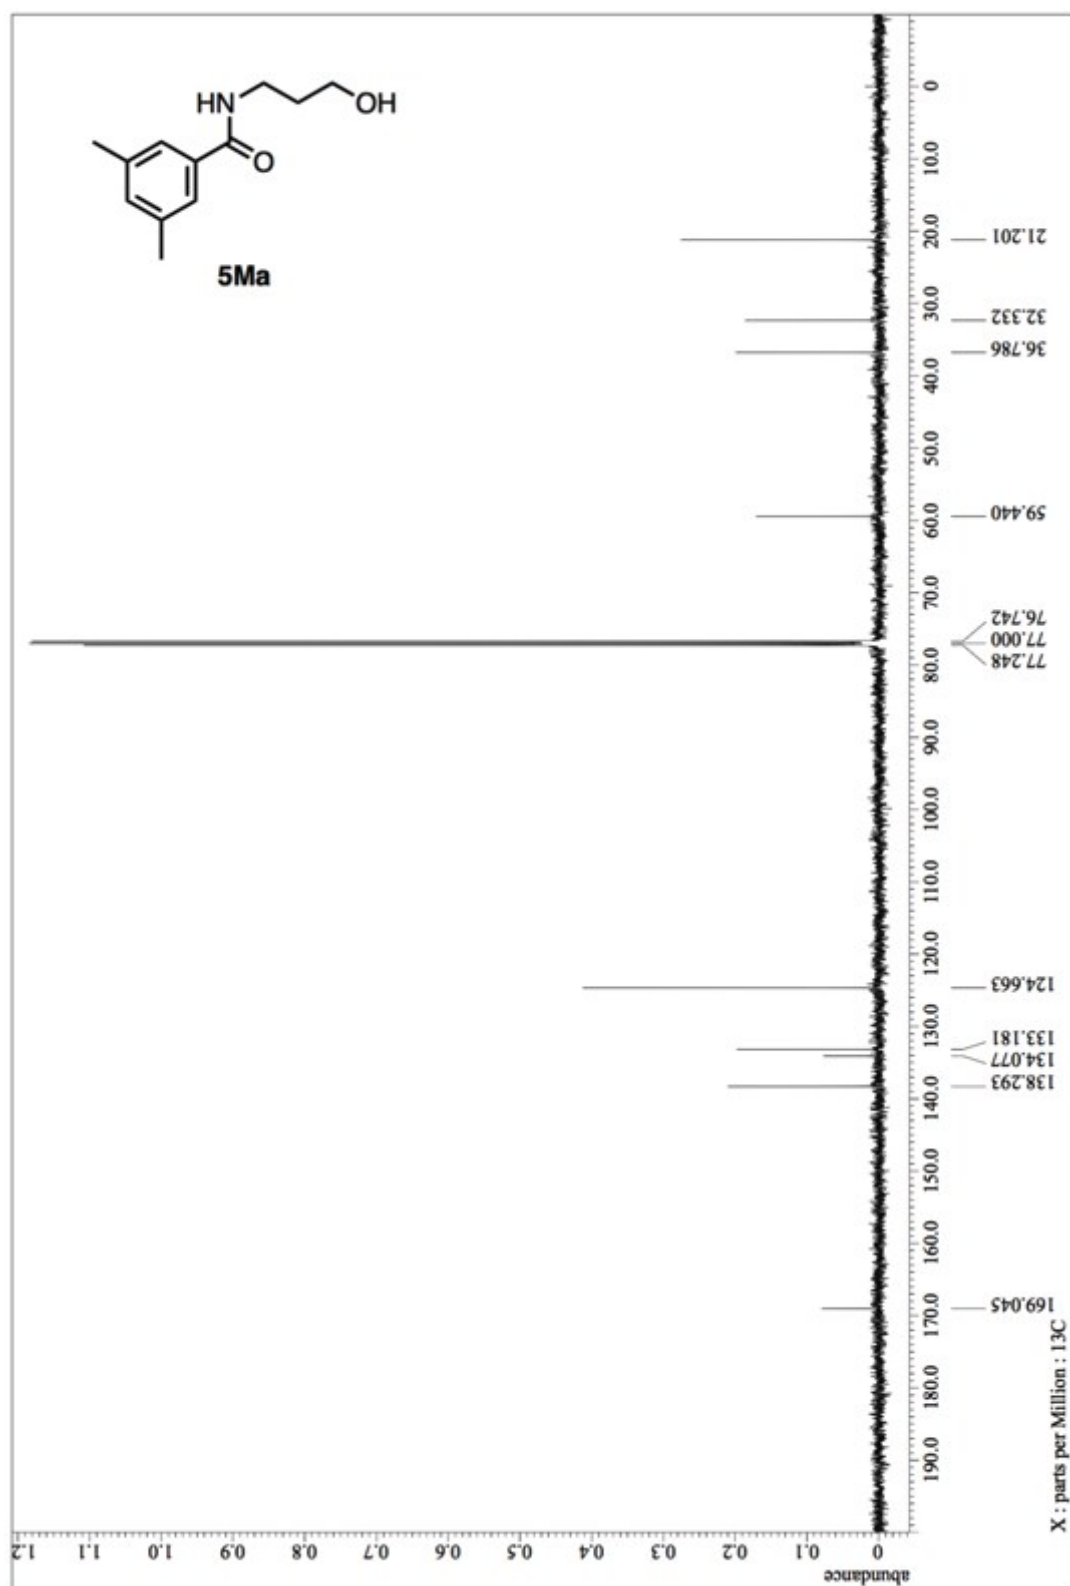



$^1\text{H}$  NMR (600MHz,  $\text{CDCl}_3$ ) of (*E*)-6A

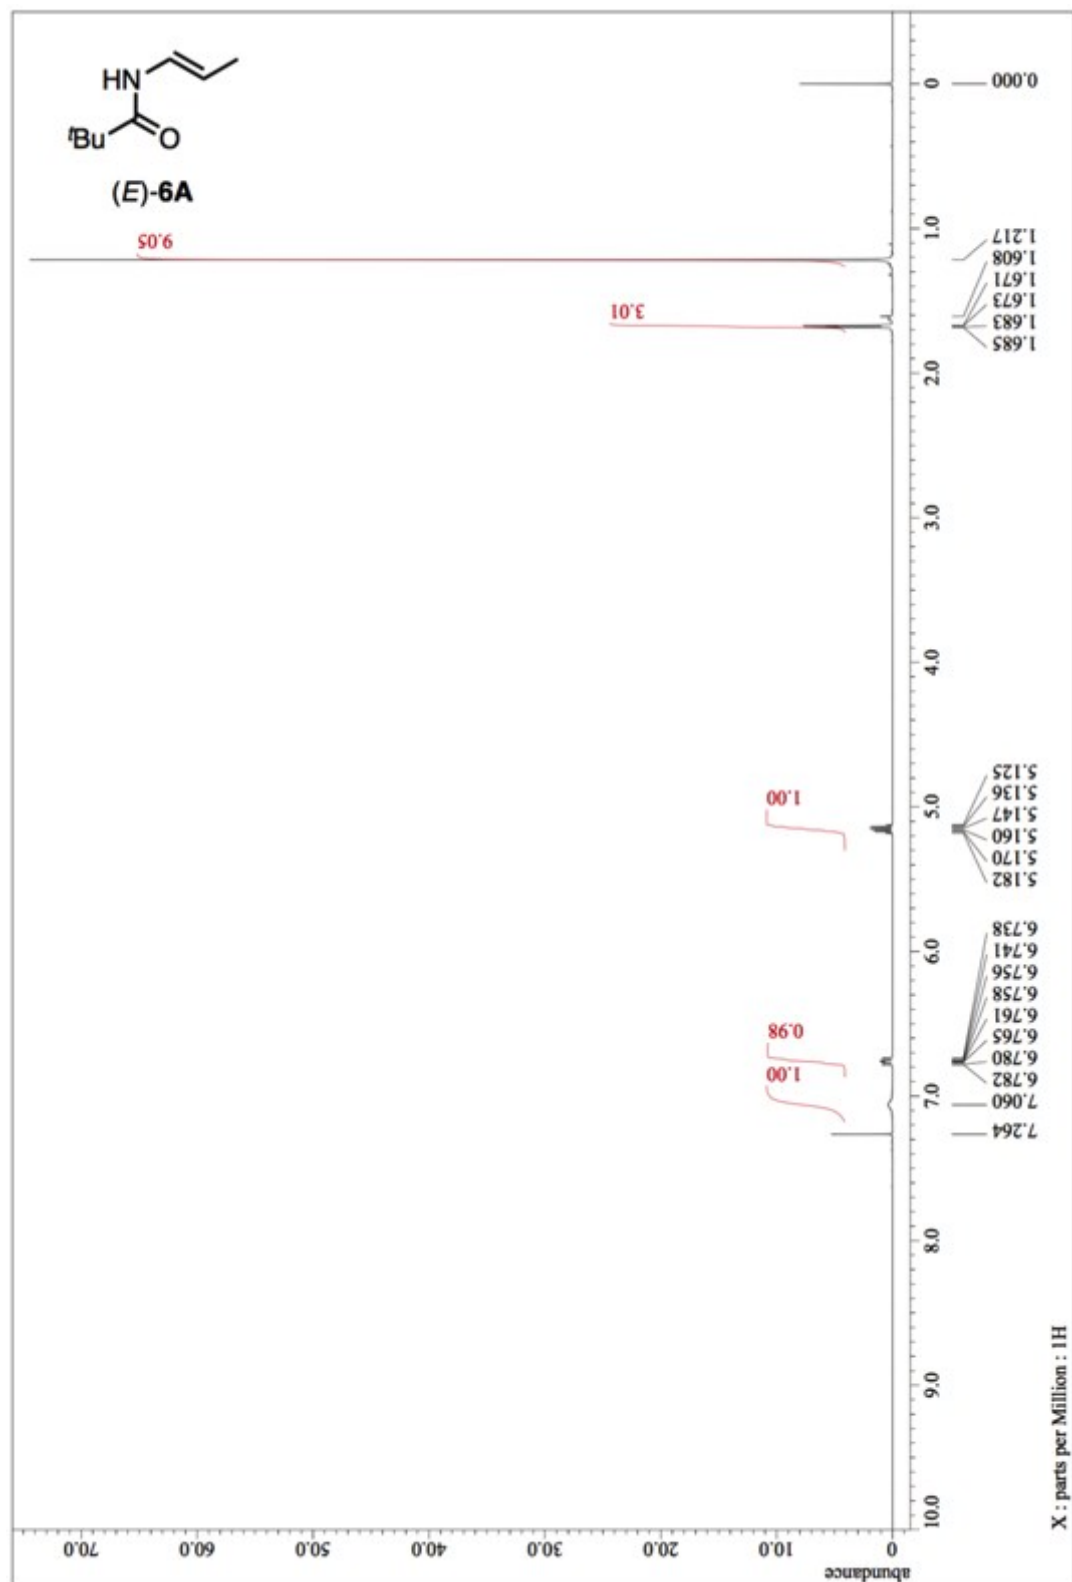

$^{13}\text{C}$  NMR (151MHz,  $\text{CDCl}_3$ ) of (E)-6A

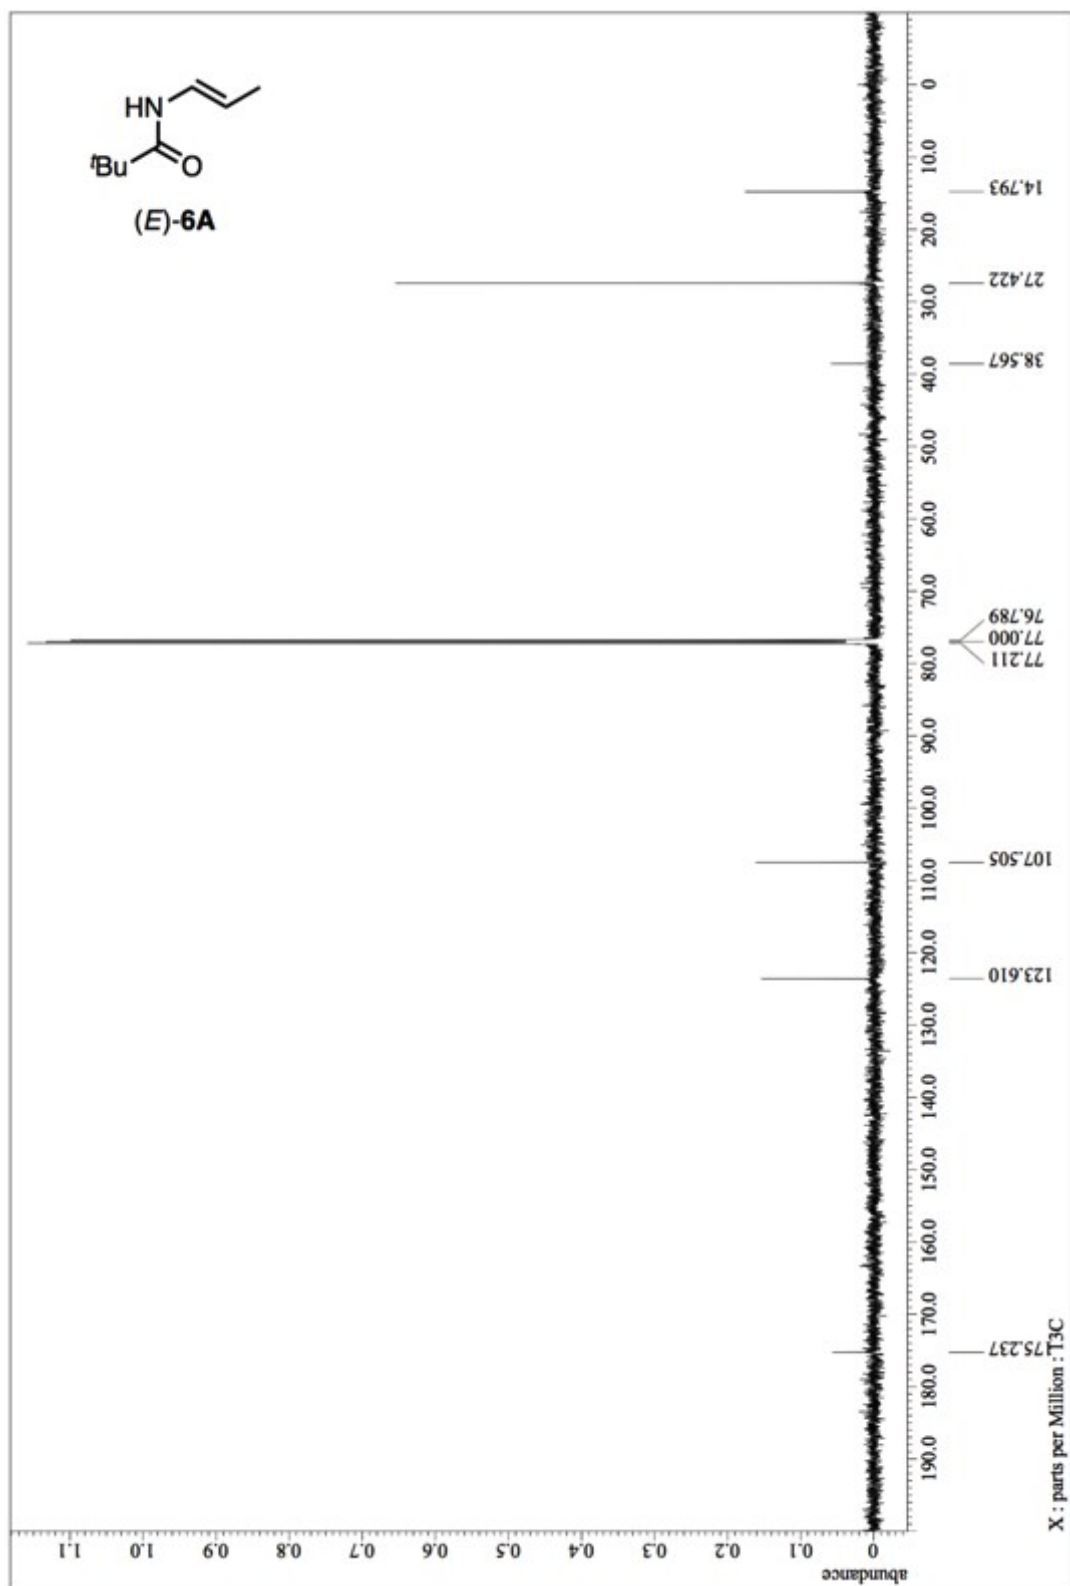

$^1\text{H}$  NMR (600MHz,  $\text{CDCl}_3$ ) of (Z)-6A

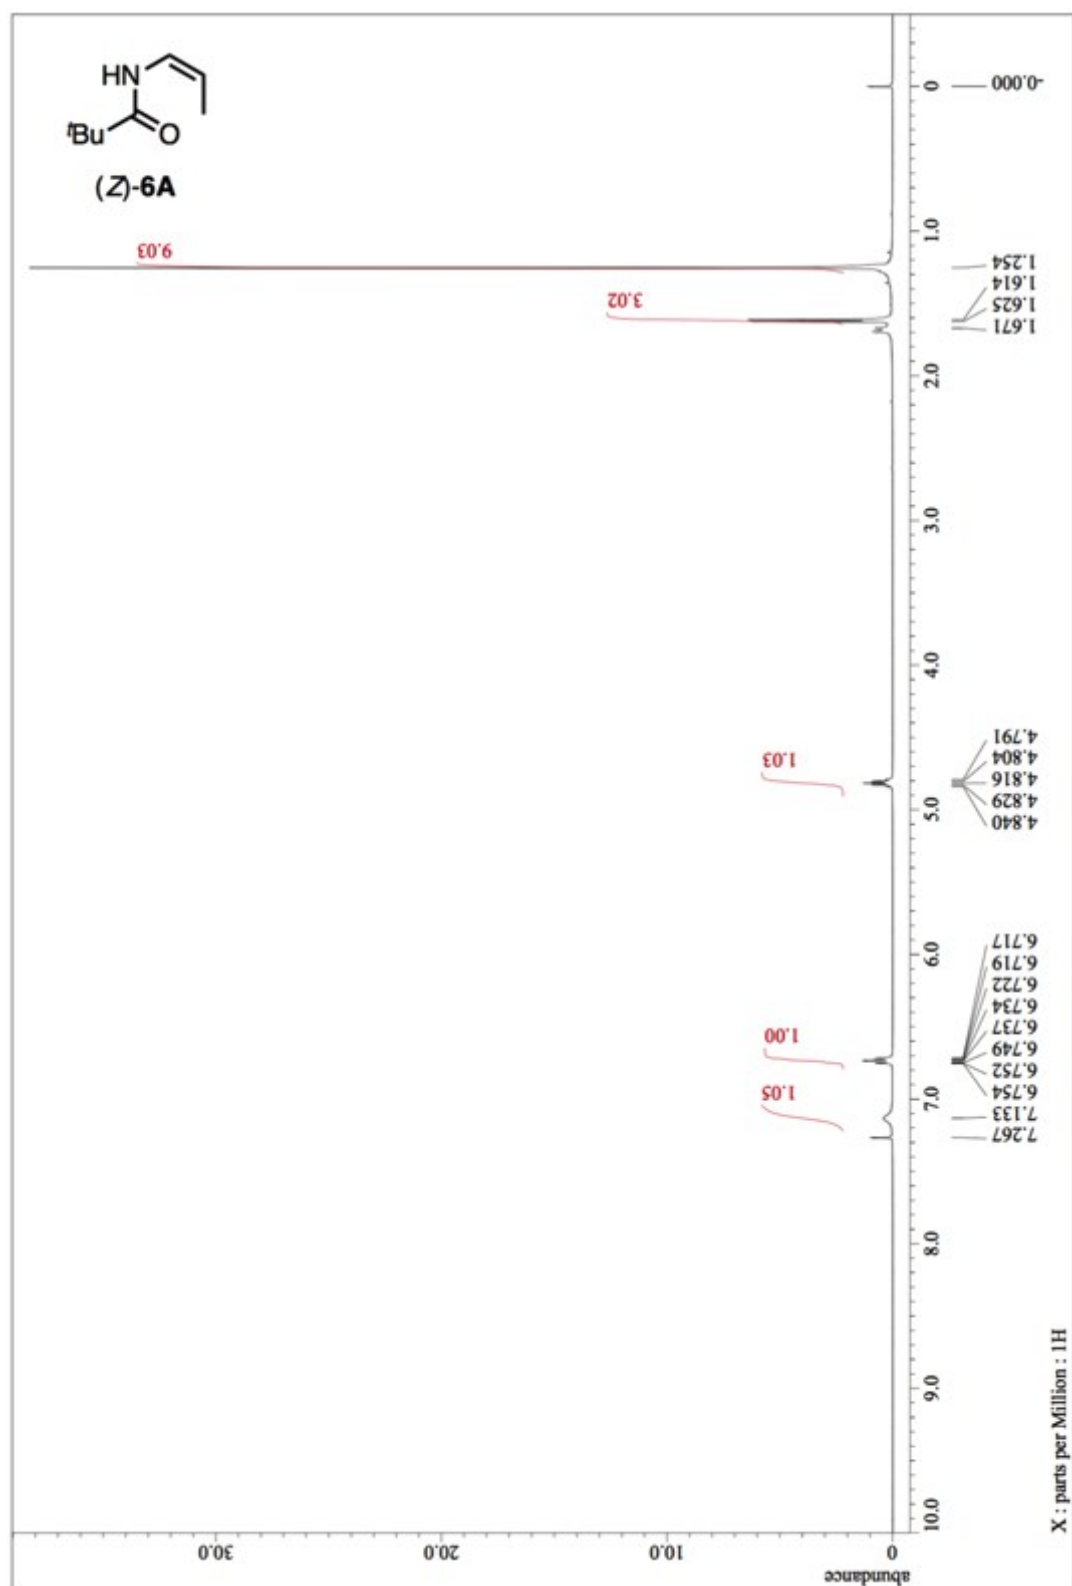

$^{13}\text{C}$  NMR (151MHz,  $\text{CDCl}_3$ ) of (Z)-6A

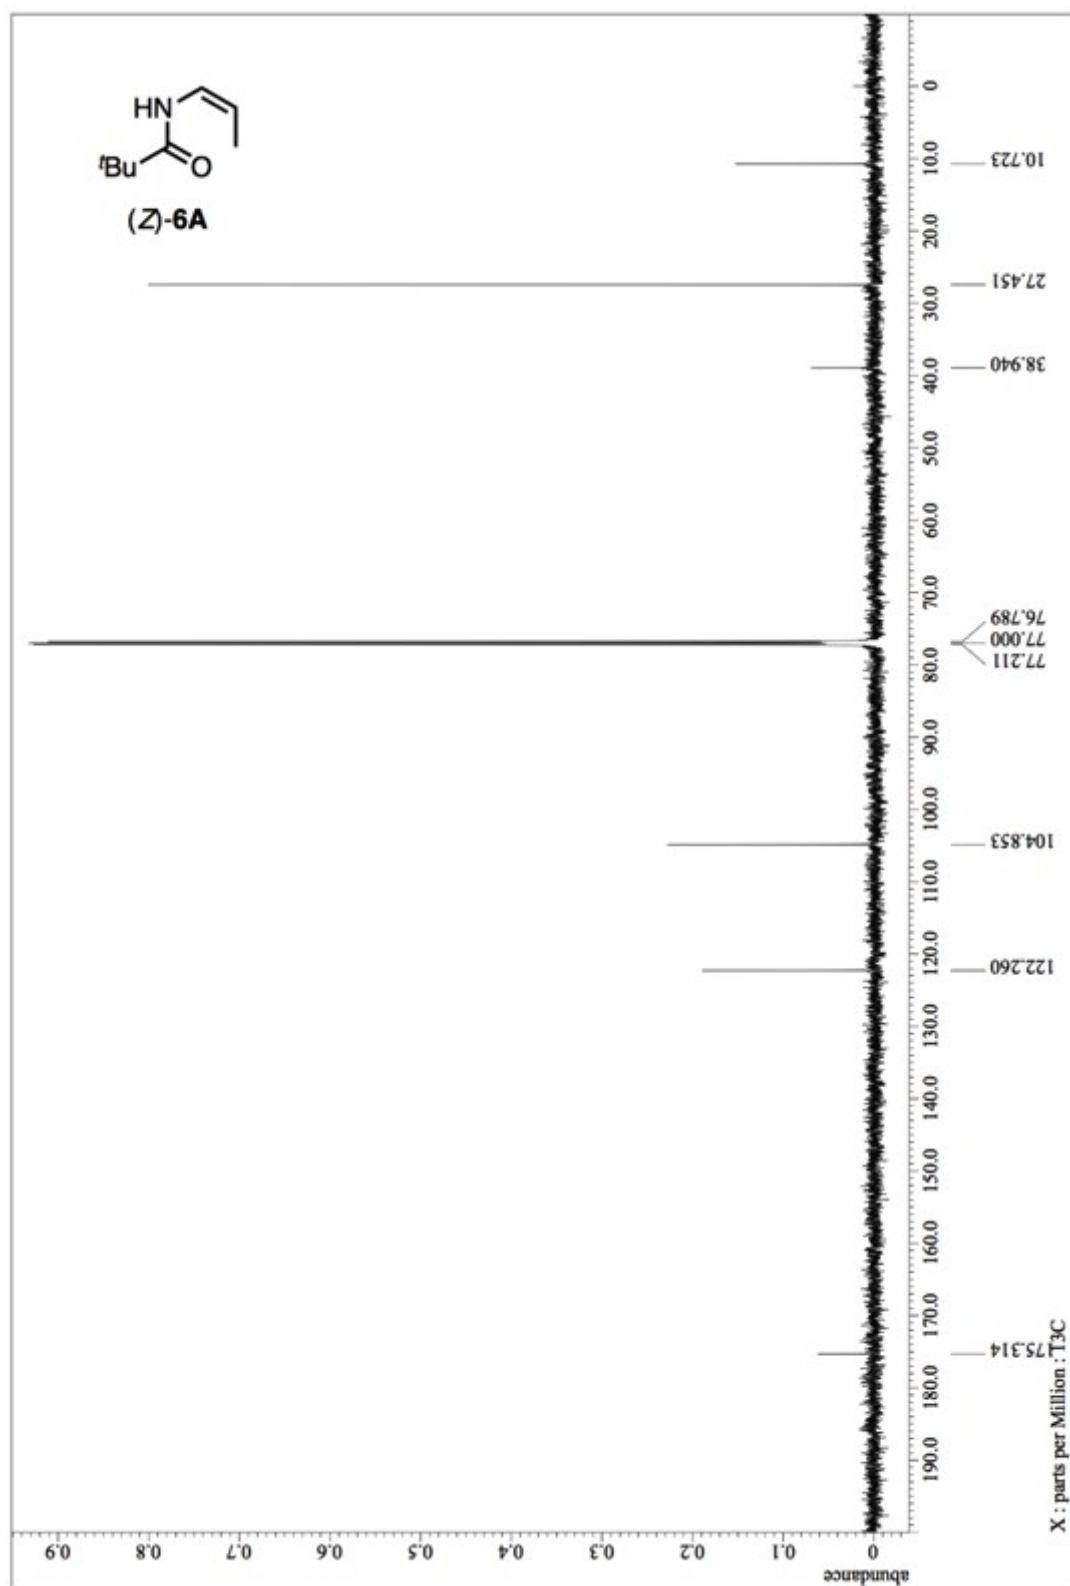

<sup>1</sup>H NMR (600MHz, CD<sub>2</sub>Cl<sub>2</sub>) of 9Aa

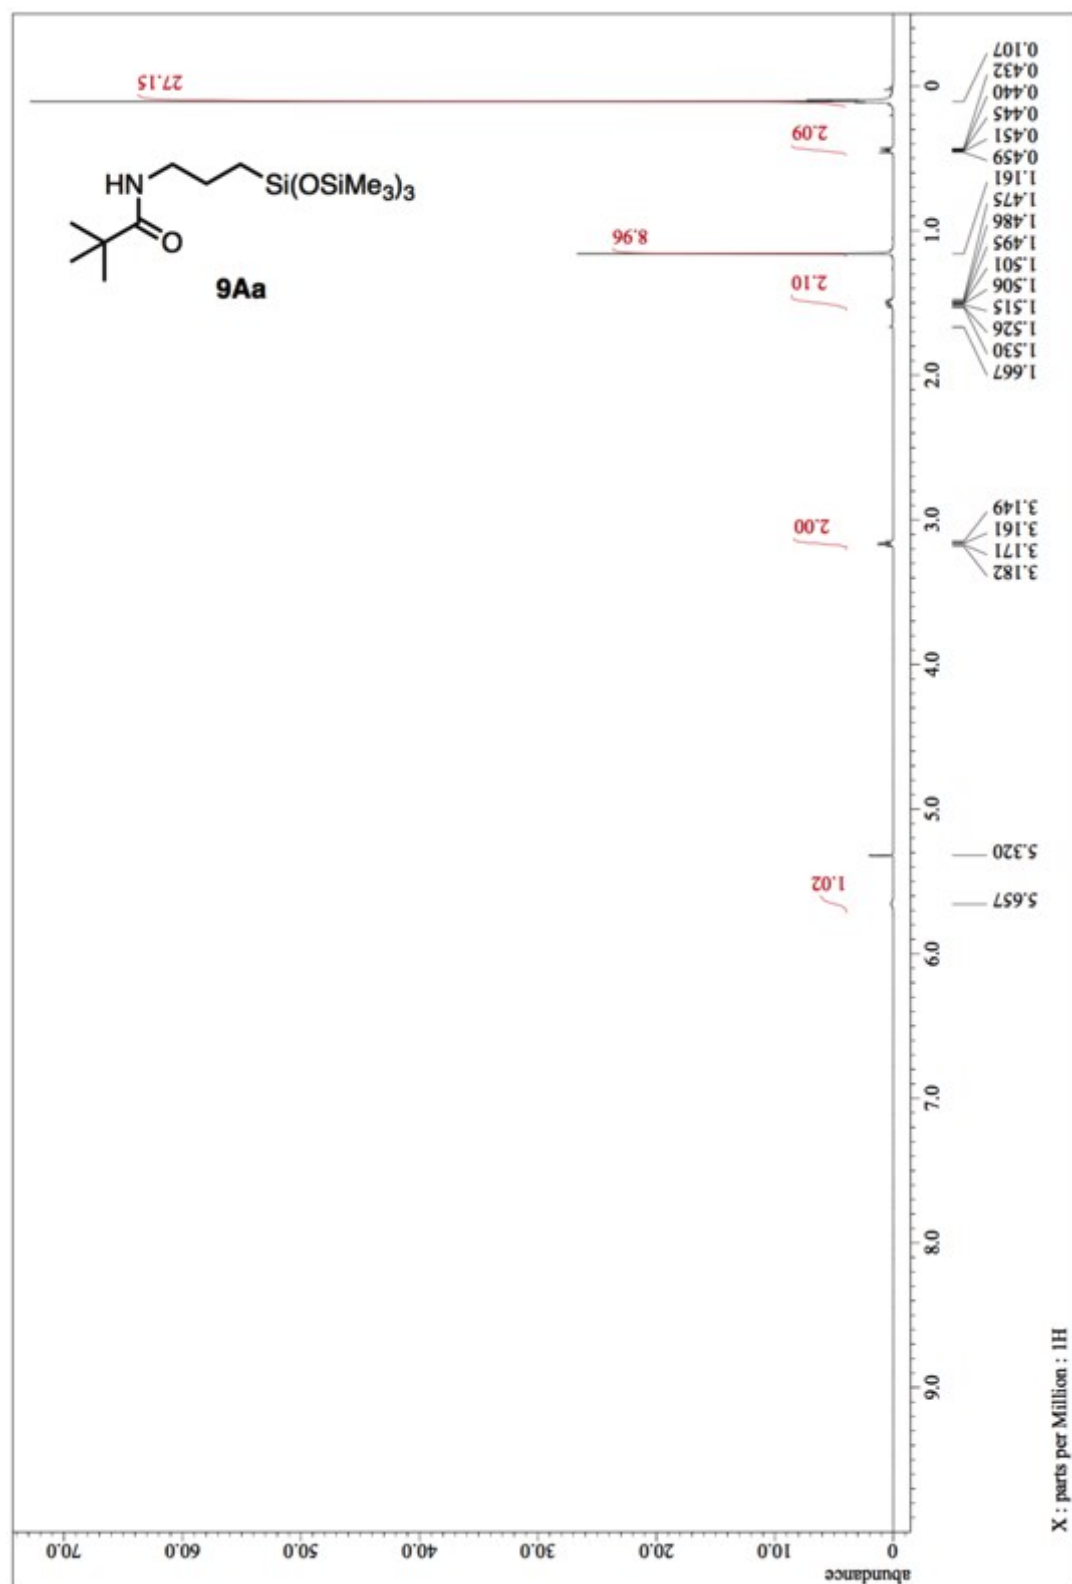

$^{13}\text{C}$  NMR (151MHz,  $\text{CD}_2\text{Cl}_2$ ) of 9Aa

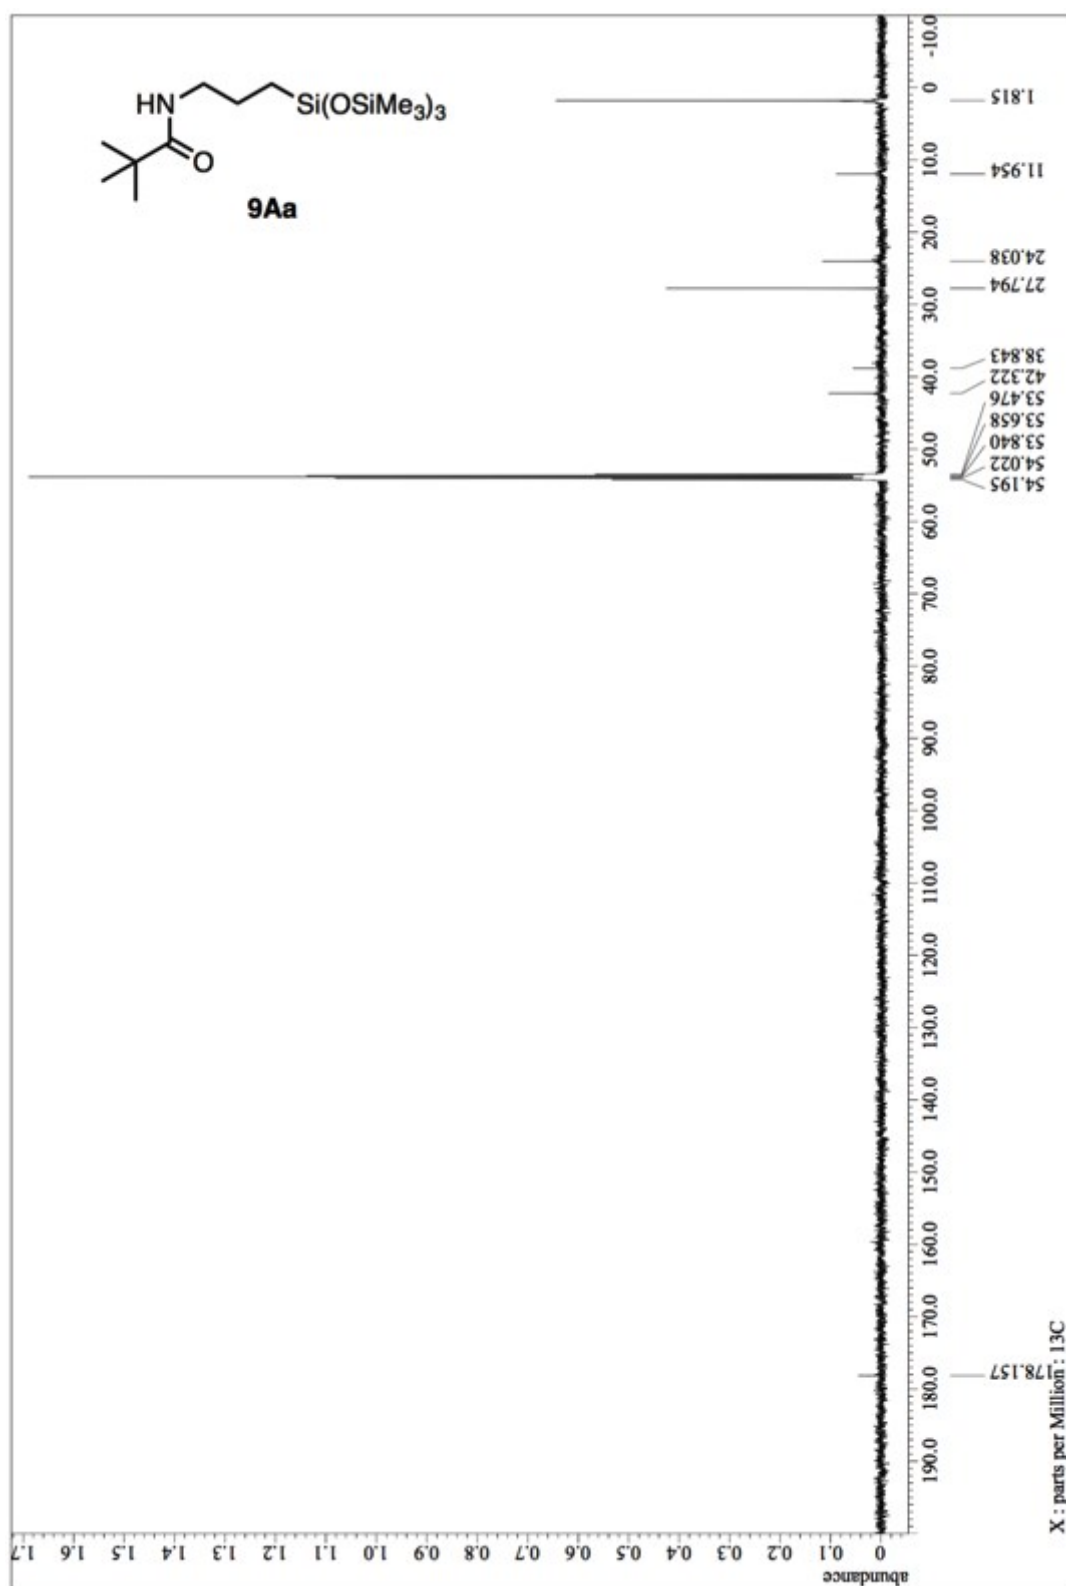

Supplement: c7sc00071e1.pdf [file c7sc00071e1.pdf]
